# Supplementary material for: RNA-Seq of Dermal Fibroblasts from Patients with Hypermobile Ehlers–Danlos Syndrome and Hypermobility Spectrum Disorders Supports Their Categorization as a Single Entity with Involvement of Extracellular Matrix Degrading and Proinflammatory Pathomechanisms
Source: Cells. 2022 Dec 14;11(24):4040. doi: 10.3390/cells11244040 (PMC9777098; doi:10.3390/cells11244040)
Supplement: Supplementary file 1 [file cells-11-04040-s001.zip]

Archive with 6 entries (6 files):
- Supplementary materials/Supplementary Figures.pdf
- Supplementary materials/Table S1.xlsx
- Supplementary materials/Table S2.xlsx
- Supplementary materials/Table S3.xlsx
- Supplementary materials/Table S4.xlsx
- Supplementary materials/Table S5.xls
