# Supplementary material for: RNA-Seq of Dermal Fibroblasts from Patients with Hypermobile Ehlers–Danlos Syndrome and Hypermobility Spectrum Disorders Supports Their Categorization as a Single Entity with Involvement of Extracellular Matrix Degrading and Proinflammatory Pathomechanisms
Source: Cells. 2022 Dec 14;11(24):4040. doi: 10.3390/cells11244040 (PMC9777098; doi:10.3390/cells11244040)
Supplement: Supplementary file 1 [file cells-11-04040-s001.zip › Supplementary materials/Table S1.xlsx]

## Sheet: hEDS
	PERSONAL INFORMATION		2017 new nosology (hEDS) Hypermobility Spectrum Disorders (HSD) for all those patients who do not fullfill the new criteria																														MUCOCUTANEOUS SIGNS													OSTEOARTICULAR SIGNS
patient ID	SEX	AGE AT LAST EVALUATION	2017 hEDS nosology (Criteria 1+2+3)	BEIGHTON SCORE	BS ≥6 for pre-pubertal children and adolescents, ≥5 for pubertal men and women up to the age of 50, and ≥4 for those >50 years	Unusually soft or velvety skin	Mild skin hyperextensibility (>1.5 cm)	Striae distensae/rubrae prepuberal or unusual sites	Bilateral piezogenic papules of heels	Recurrent or multiple abdominal hernia(s) (e.g., umbilical, inguinal, crural)	Atrophic scarring involving at least 2 sites	Pelvic floor, rectal, and/or uterine prolapse in children, men or nulliparous women without a history of morbid obesity or other known predisposing medical condition	Dental crowding and high or narrow palate	Arachnodactyly	Arm span-to-height ≥1.05	Mitral valve prolapse (MVP)	Aortic root dilatation with Z-score > +2	5 or more features present	n° of features	Positive family history, with one or more first degree relatives independently meeting the current diagnostic criteria	Musculoskeletal pain in two or more limbs, recurring daily for at least 3 months	Chronic, widespread pain for ≥3 months	Recurrent joint dislocations or frank joint instability, in the absence of trauma	Positive Feature C (at least one)	CRITERION 2	FOR A POSITIVE CRETERION 2: Two or More Among the Features (A–C) MUST Be Present (A and B; A and C; B and C; A and B and C)				Absence of unusual skin fragility	Exclusion of other heritable and acquired connective tissue disorders	Exclusion of alternative diagnoses that may also include joint hypermobility by means of hypotonia and/or connective tissue laxity	Mild skin hyperextensibility (>1.5 cm)	Unusually soft or velvety skin	Strie distensae/rubrae preebuberal or unusula sites	Atrophic scarring involving at least 2 sites	Small or post-surgical atrophic scars	Bilateral piezogenic papules of heels	Keratosis pilaris	Recurrent or multiple abdominal hernia(s) (e.g., umbilical, inguinal, crural)	Light blue sclerae	Easy bruising	Gingival inflammation/recessions	Resistance to local anaesthetic drugs	Uvula abnormalities	BEIGHTON SCORE	Generalized joint hypermobility (BS≥5/9)	Historical joint hypermobility (5-point questionnaire)	Congenital hip dysplasia
						Feature A (must have at least 5)														Feature B	Feature C (at least one)									CRITERION 3 (all must be met)
				CRITERION 1		CRITERION 2: Two or More Among Features (A–C) MUST Be Present (A and B; A and C; B and C; A and B and C) Feature A (must have at least 5)																				A+B	A+C	B+C	A+B+C
P1	F	36	+	5	+	+	+	+	+	-	+	+	+	-	-	-	-	+	7	+	NV	+	+	+	+	+	+	+	+	+	+	+	+	+	+	+	+	+	-	-	+	+	+	-	-	5	+	+	-
P2	F	47	+	5	+	+	+	+	+	-	-	-	+	-	-	+	-	+	6	-	NV	+	+	+	+	-	+	-	-	+	+	+	+	+	+	-	-	+	-	-	+	+	+	-	+	5	+	+	-
P3	F	31	+	6	+	+	+	+	+	-	+	+	+	-	-	+	-	+	8	-	NV	+	+	+	+	-	+	-	-	+	+	+	+	+	+	+	+	+	-	-	+	+	+	+	-	6	+	+	-
P4	F	52	+	5	+	+	+	-	+	-	+	-	+	-	-	-	-	+	5	-	NV	+	+	+	+	-	+	-	-	+	+	+	+	+	-	+	+	+	-	-	-	+	+	+	+	5	+	+	-
P5	F	17	+	5	+	+	+	+	+	-	+	-	+	-	-	-	-	+	6	-	NV	+	+	+	+	-	+	-	-	+	+	+	+	+	+	+	+	+	-	-	+	-	+	-	-	5	+	+	-
P6	F	54	+	5	+	+	+	+	+	-	+	-	+	-	-	+	-	+	7	-	NV	+	+	+	+	-	+	-	-	+	+	+	+	+	+	+	+	+	-	-	+	+	-	-	+	5	+	+	-
P7	F	38	+	5	+	+	+	+	+	-	-	+	-	+	-	+	-	+	7	-	NV	+	+	+	+	-	+	-	-	+	+	+	+	+	+	-	+	+	-	-	-	+	+	+	+	5	+	+	-
P8	F	30	+	5	+	+	-	+	+	-	+	-	+	-	-	-	-	+	5	-	NV	+	+	+	+	-	+	-	-	+	+	+	-	+	+	+	+	+	-	-	-	+	+	+	-	5	+	+	-
P9	F	43	+	6	+	-	+	+	+	+	+	-	+	+	-	+	-	+	8	-	NV	+	+	+	+	-	+	-	-	+	+	+	+	-	+	+	+	+	-	+	+	+	-	+	-	6	+	+	-
P10	F	18	+	5	+	+	+	+	+	-	+	-	+	+	-	+	-	+	8	-	NV	+	+	+	+	-	+	-	-	+	+	+	+	+	+	+	+	+	+	-	+	+	+	+	+	5	+	+	-
P11	F	28	+	6	+	+	+	+	+	-	-	-	+	-	-	+	-	+	6	+	NV	+	+	+	+	+	+	+	+	+	+	+	+	+	+	-	+	+	-	-	+	+	+	+	-	6	+	+	-
P12	F	51	+	6	+	+	+	+	+	-	+	-	+	-	-	+	-	+	7	-	NV	+	+	+	+	-	+	-	-	+	+	+	+	+	+	+	+	+	-	-	-	+	+	+	-	6	+	+	-
P13	F	37	+	5	+	+	-	+	+	-	+	+	-	-	-	-	-	+	5	-	NV	+	+	+	+	-	+	-	-	+	+	+	-	+	+	+	+	+	+	-	+	+	+	-	-	5	+	+	-
P14	F	38	+	5	+	+	-	+	+	-	-	+	+	-	-	+	-	+	6	-	+	-	+	+	+	-	+	-	-	+	+	+	-	+	+	-	+	+	-	-	+	+	+	-	-	5	+	+	-
P15	F	38	+	7	+	+	+	+	+	-	+	+	+	-	-	+	-	+	8	-	NV	+	+	+	+	-	+	-	-	+	+	+	+	+	+	+	+	+	-	-	+	+	+	+	+	7	+	+	-
P16	F	35	+	5	+	+	+	+	+	-	-	-	+	+	-	+	-	+	7	-	NV	+	+	+	+	-	+	-	-	+	+	+	+	+	+	-	+	+	-	-	+	+	+	+	-	5	+	+	-
P17	F	45	+	5	+	+	+	+	+	-	-	-	+	-	-	+	-	+	6	-	NV	+	+	+	+	-	+	-	-	+	+	+	+	+	+	-	+	+	+	-	-	+	-	+	-	5	+	+	-
P18	F	39	+	9	+	+	+	+	+	-	+	+	+	-	-	+	-	+	8	-	NV	+	+	+	+	-	+	-	-	+	+	+	+	+	+	+	+	+	-	-	+	+	+	+	-	9	+	+	-
P19	F	43	+	5	+	-	-	+	+	+	-	-	+	+	-	+	-	+	6	-	NV	+	+	+	+	-	+	-	-	+	+	+	-	-	+	-	-	+	+	+	+	+	+	-	-	5	+	+	-
P20	F	20	+	9	+	+	+	-	+	-	-	-	+	-	-	+	-	+	5	-	+	-	+	+	+	-	+	-	-	+	+	+	+	+	-	-	-	+	-	-	+	+	-	+	+	9	+	+	+
[truncated: 88 more columns]

## Sheet: HSD
	PERSONAL INFORMATION		2017 new nosology (hEDS) Hypermobility Spectrum Disorders (HSD) for all those patients who do not fullfill the new criteria																														MUCOCUTANEOUS SIGNS													OSTEOARTICULAR SIGNS
Pateint ID	SEX	AGE AT LAST EVALUATION	2017 hEDS nosology (Criteria 1+2+3)	BEIGHTON SCORE	BS ≥6 for pre-pubertal children and adolescents, ≥5 for pubertal men and women up to the age of 50, and ≥4 for those >50 years	Unusually soft or velvety skin	Mild skin hyperextensibility (>1.5 cm)	Striae distensae/rubrae prepuberal or unusual sites	Bilateral piezogenic papules of heels	Recurrent or multiple abdominal hernia(s) (e.g., umbilical, inguinal, crural)	Atrophic scarring involving at least 2 sites	Pelvic floor, rectal, and/or uterine prolapse in children, men or nulliparous women without a history of morbid obesity or other known predisposing medical condition	Dental crowding and high or narrow palate	Arachnodactyly	Arm span-to-height ≥1.05	Mitral valve prolapse (MVP)	Aortic root dilatation with Z-score > +2	5 or more features present	n° of features	Positive family history, with one or more first degree relatives independently meeting the current diagnostic criteria	Musculoskeletal pain in two or more limbs, recurring daily for at least 3 months	Chronic, widespread pain for ≥3 months	Recurrent joint dislocations or frank joint instability, in the absence of trauma	Positive Feature C (at least one)	CRITERION 2	FOR A POSITIVE CRETERION 2: Two or More Among the Features (A–C) MUST Be Present (A and B; A and C; B and C; A and B and C)				Absence of unusual skin fragility	Exclusion of other heritable and acquired connective tissue disorders	Exclusion of alternative diagnoses that may also include joint hypermobility by means of hypotonia and/or connective tissue laxity	Mild skin hyperextensibility (>1.5 cm)	Unusually soft or velvety skin	Strie distensae/rubrae preebuberal or unusula sites	Atrophic scarring involving at least 2 sites	Small or post-surgical atrophic scars	Bilateral piezogenic papules of heels	Keratosis pilaris	Recurrent or multiple abdominal hernia(s) (e.g., umbilical, inguinal, crural)	Light blue sclerae	Easy bruising	Gingival inflammation/recessions	Resistance to local anaesthetic drugs	Uvula abnormalities	BEIGHTON SCORE	Generalized joint hypermobility (BS≥5/9)	Historical joint hypermobility (5-point questionnaire)	Congenital hip dysplasia
						Feature A (must have at least 5)														Feature B	Feature C (at least one)									CRITERION 3 (all must be met)
				CRITERION 1		CRITERION 2: Two or More Among Features (A–C) MUST Be Present (A and B; A and C; B and C; A and B and C) Feature A (must have at least 5)																				A+B	A+C	B+C	A+B+C
H1	F	54	-	4	+	+	-	+	+	-	-	-	+	-	-	-	-	-	4	-	NV	+	+	+	-	-	-	-	-	+	+	+	-	+	+	-	+	+	-	-	+	+	+	+	+	5	-	+	-
H2	F	49	-	5	+	+	-	+	+	-	-	-	+	-	-	-	-	-	4	-	NV	+	+	+	-	-	-	-	-	+	+	+	-	+	+	-	-	+	-	-	-	+	-	-	+	5	+	+	-
H3	M	46	-	7	+	+	+	-	-	-	-	-	-	-	-	+	-	-	3	-	NV	+	-	+	-	-	-	-	-	+	+	+	+	+	-	-	-	-	-	-	+	-	+	-	+	7	+	+	-
H4	F	29	-	5	+	-	-	+	+	-	+	-	+	-	-	-	-	-	4	-	+	-	-	+	-	-	-	-	-	+	+	+	-	-	+	+	+	+	-	-	-	+	-	-	+	5	+	+	-
H5	F	21	-	5	+	-	-	+	+	-	-	-	+	-	-	-	-	-	3	-	NV	+	+	+	-	-	-	-	-	+	+	+	-	-	+	-	+	+	-	-	+	+	+	+	+	5	+	+	-
H6	F	30	-	4	-	+	-	+	+	-	-	-	-	+	+	+	-	+	6	-	-	-	+	+	+	-	+	-	-	+	+	+	-	+	+	-	+	+	-	-	+	+	-	-	+	4	-	+	-
H7	F	32	-	5	+	+	+	-	-	-	-	-	+	-	-	-	-	-	3	-	NV	+	+	+	-	-	-	-	-	+	+	+	+	+	-	-	-	-	-	-	+	+	-	-	+	5	-	+	-
H8	F	23	-	3	-	+	-	+	+	-	-	-	-	-	-	-	-	-	3	-	NV	+	+	+	-	-	-	-	-	+	+	+	-	-	+	-	-	+	+	-	+	+	+	-	-	3	-	+	-
H9	F	17	-	5	+	+	-	-	+	-	-	-	-	-	-	-	-	-	2	-	+	-	-	+	-	-	-	-	-	+	+	+	-	+	-	-	+	+	-	-	+	+	+	-	-	5	+	+	-
H10	M	36	-	3	-	+	+	+	+	-	+	-	+	-	-	-	-	+	6	-	NV	+	+	+	+	-	+	-	-	+	+	+	+	+	+	+	+	+	-	-	+	-	-	+	+	3	-	+	-
H11	F	39	-	5	+	-	+	+	+	-	-	+	-	-	-	-	-	-	4	-	NV	+	+	+	-	-	-	-	-	+	+	+	+	-	+	-	-	+	-	-	+	+	+	-	+	5	-	+	-
H12	F	24	-	3	-	+	+	+	+	-	+	-	+	-	-	+	-	+	7	-	NV	+	+	+	+	-	+	-	-	+	+	+	+	+	+	+	+	+	-	-	+	+	+	-	-	3	+	+	-
H13	F	28	-	5	+	-	-	+	+	-	-	-	-	-	-	-	-	-	2	-	+	-	+	+	-	-	-	-	-	+	+	+	-	-	+	-	-	+	+	-	+	+	-	-	+	5	+	+	-
H14	M	37	-	5	+	-	+	-	+	-	-	-	+	-	+	-	-	-	4	-	NV	+	+	+	-	-	-	-	-	+	+	+	+	-	-	-	-	+	-	-	+	+	-	-	-	5	-	+	-
H15	F	54	-	3	-	+	-	+	+	-	-	-	-	-	-	+	-	-	4	-	NV	+	-	+	-	-	-	-	-	+	+	+	-	+	+	-	+	+	-	-	-	+	+	+	-	3	-	+	-
H16	M	27	-	2	-	-	+	-	+	-	-	-	-	-	-	-	-	-	2	-	NV	+	-	+	-	-	-	-	-	+	+	+	+	-	-	-	+	+	-	-	-	-	-	-	+	2	-	+	-
H17	F	53	-	2	-	+	-	-	+	-	+	-	-	-	-	-	-	-	3	-	NV	+	+	+	-	-	-	-	-	+	+	+	-	+	-	+	+	+	+	-	-	-	-	-	-	2	-	+	-
H18	F	32	-	3	-	-	-	+	+	-	-	-	+	-	-	+	-	-	4	-	NV	+	+	+	-	-	-	-	-	+	+	+	-	-	+	-	+	+	-	-	+	+	+	+	-	3	-	+	-
H19	F	48	-	4	-	+	+	+	+	-	-	-	-	+	-	-	-	+	5	-	NV	+	+	+	+	-	+	-	-	+	+	+	+	+	+	-	-	+	-	-	-	+	-	+	+	4	+	+	-
H20	F	30	-	4	-	+	-	+	+	-	+	-	-	+	-	-	-	+	5	-	+	-	+	+	+	-	+	-	-	+	+	+	-	+	+	+	+	+	+	-	+	+	-	-	+	4	-	+	-
[truncated: 88 more columns]
