# Supplementary material for: RNA-Seq of Dermal Fibroblasts from Patients with Hypermobile Ehlers–Danlos Syndrome and Hypermobility Spectrum Disorders Supports Their Categorization as a Single Entity with Involvement of Extracellular Matrix Degrading and Proinflammatory Pathomechanisms
Source: Cells. 2022 Dec 14;11(24):4040. doi: 10.3390/cells11244040 (PMC9777098; doi:10.3390/cells11244040)
Supplement: Supplementary file 1 [file cells-11-04040-s001.zip › Supplementary materials/Table S2.xlsx]

## Sheet: hEDS vs controls
722 DEGs identified in hEDS vs control
Gene Symbol	GENENAME	GENETYPE	hEDS Avg (log2)	control Avg (log2)	Fold Change	uncorrected p-value ≤0.01	FDR-adjusted p-value ≤0.01
PI16	peptidase inhibitor 16	protein-coding	2,82	6,08	-9,56	0,0001	0,0025
FOSB	FosB proto-oncogene, AP-1 transcription factor subunit	protein-coding	1,15	3,94	-6,89	1,02E-10	9,26E-08
IGFBP7	insulin like growth factor binding protein 7	protein-coding	5,55	8,25	-6,5	4,72E-09	1,64E-06
PAX8-AS1	PAX8 antisense RNA 1	ncRNA	2,17	4,43	-4,77	0,0006	0,0076
SIK1	salt inducible kinase 1	protein-coding	2,05	4,21	-4,46	2,36E-11	3,78E-08
CACNB4	calcium voltage-gated channel auxiliary subunit beta 4	protein-coding	0,32	2,46	-4,4	4,72E-07	4,32E-05
GALNT12	polypeptide N-acetylgalactosaminyltransferase 12	protein-coding	1,68	3,69	-4,04	3,16E-07	3,18E-05
KRT19	keratin 19	protein-coding	3,17	5,17	-3,99	4,89E-06	0,0002
NR4A2	nuclear receptor subfamily 4 group A member 2	protein-coding	1,04	3,03	-3,97	1,04E-08	2,74E-06
FOS	Fos proto-oncogene, AP-1 transcription factor subunit	protein-coding	3,68	5,66	-3,94	4,01E-08	7,73E-06
NR4A1	nuclear receptor subfamily 4 group A member 1	protein-coding	2,32	4,28	-3,89	8,90E-08	1,41E-05
DEPTOR	DEP domain containing MTOR interacting protein	protein-coding	4,05	6	-3,87	0,0005	0,0068
GPRC5A	G protein-coupled receptor class C group 5 member A	protein-coding	2,6	4,52	-3,79	3,44E-06	0,0002
FRAS1	Fraser extracellular matrix complex subunit 1	protein-coding	3,38	5,29	-3,77	1,80E-07	2,15E-05
TNXB	tenascin XB	protein-coding	3,44	5,31	-3,67	2,28E-05	0,0007
TNXA	tenascin XA (pseudogene)	pseudo	1,94	3,74	-3,47	7,12E-07	5,95E-05
NPR3	natriuretic peptide receptor 3	protein-coding	5,19	6,98	-3,46	4,11E-07	3,94E-05
COMP	cartilage oligomeric matrix protein	protein-coding	5,85	7,64	-3,46	0,0002	0,0034
BMP6	bone morphogenetic protein 6	protein-coding	2,07	3,84	-3,41	2,71E-08	6,00E-06
COL14A1	collagen type XIV alpha 1 chain	protein-coding	1,65	3,42	-3,39	3,39E-07	3,39E-05
LIMS2	LIM zinc finger domain containing 2	protein-coding	4,53	6,28	-3,36	3,04E-09	1,25E-06
NTN4	netrin 4	protein-coding	4,65	6,4	-3,35	0,0004	0,0060
RDH10	retinol dehydrogenase 10	protein-coding	5,37	7,1	-3,32	2,05E-05	0,0007
TMEM14EP	transmembrane protein 14E, pseudogene	pseudo	1,86	3,57	-3,28	1,14E-11	2,00E-08
OXTR	oxytocin receptor	protein-coding	4,32	5,97	-3,15	0,0008	0,0097
LIMCH1	LIM and calponin homology domains 1	protein-coding	3,08	4,73	-3,13	1,01E-05	0,0004
USP53	ubiquitin specific peptidase 53	protein-coding	5,83	7,46	-3,11	1,27E-05	0,0005
WNT2	Wnt family member 2	protein-coding	3,03	4,64	-3,04	3,02E-07	3,09E-05
LHX9	LIM homeobox 9	protein-coding	0,84	2,44	-3,02	1,61E-05	0,0006
GRAMD2B	GRAM domain containing 2B	protein-coding	5,2	6,79	-3,01	9,75E-08	1,47E-05
MYH2	myosin heavy chain 2	protein-coding	0,73	2,31	-2,99	1,19E-05	0,0005
NEAT1	nuclear paraspeckle assembly transcript 1	ncRNA	7,77	9,35	-2,99	3,51E-10	2,21E-07
SHROOM3	shroom family member 3	protein-coding	4,15	5,73	-2,97	3,28E-12	8,53E-09
CSF2RB	colony stimulating factor 2 receptor subunit beta	protein-coding	-0,01	1,56	-2,96	1,34E-05	0,0005
TENM3	teneurin transmembrane protein 3	protein-coding	3,85	5,4	-2,94	0,0005	0,0065
CRLF1	cytokine receptor like factor 1	protein-coding	3,97	5,52	-2,92	0,0001	0,0028
RHOJ	ras homolog family member J	protein-coding	0,68	2,21	-2,9	2,65E-10	1,90E-07
SCARNA5	small Cajal body-specific RNA 5	ncRNA	3,72	5,25	-2,9	1,22E-07	1,64E-05
NCKAP5	NCK associated protein 5	protein-coding	1,62	3,15	-2,88	8,22E-07	6,52E-05
HAPLN3	hyaluronan and proteoglycan link protein 3	protein-coding	2,73	4,25	-2,87	1,15E-06	8,44E-05
SULF1	sulfatase 1	protein-coding	7,94	9,44	-2,84	6,13E-06	0,0003
PLCE1-AS1	PLCE1 antisense RNA 1	ncRNA	0,47	1,97	-2,84	2,29E-06	0,0001
ABCA9	ATP binding cassette subfamily A member 9	protein-coding	2,99	4,49	-2,82	1,58E-05	0,0006
PTGIS	prostaglandin I2 synthase	protein-coding	7,04	8,52	-2,8	0,0004	0,0065
ERCC6	ERCC excision repair 6, chromatin remodeling factor	protein-coding	3,54	5,03	-2,8	4,36E-12	9,09E-09
ADAMTSL1	ADAMTS like 1	protein-coding	6,39	7,87	-2,79	0,0006	0,0084
TEK	TEK receptor tyrosine kinase	protein-coding	0,74	2,21	-2,76	2,63E-05	0,0008
ID4	inhibitor of DNA binding 4, HLH protein	protein-coding	2,03	3,49	-2,75	2,00E-05	0,0007
GCNT1	glucosaminyl (N-acetyl) transferase 1	protein-coding	4,15	5,6	-2,74	3,08E-12	8,53E-09
ARHGAP20	Rho GTPase activating protein 20	protein-coding	1,95	3,39	-2,71	2,06E-06	0,0001
HES1	hes family bHLH transcription factor 1	protein-coding	0,11	1,54	-2,7	6,30E-11	7,55E-08
PRUNE2	prune homolog 2 with BCH domain	protein-coding	1,75	3,18	-2,69	4,16E-06	0,0002
CPA4	carboxypeptidase A4	protein-coding	3,99	5,4	-2,66	4,39E-05	0,0012
BST1	bone marrow stromal cell antigen 1	protein-coding	2,59	3,98	-2,63	6,38E-06	0,0003
IGFBP5	insulin like growth factor binding protein 5	protein-coding	8,87	10,27	-2,62	0,0002	0,0035
BHLHE40	basic helix-loop-helix family member e40	protein-coding	6,7	8,09	-2,62	6,78E-11	7,55E-08
MBP	myelin basic protein	protein-coding	1,03	2,41	-2,6	1,73E-06	0,0001
MEST	mesoderm specific transcript	protein-coding	3,98	5,35	-2,6	0,0004	0,0063
AKAP12	A-kinase anchoring protein 12	protein-coding	4,57	5,94	-2,59	3,00E-06	0,0002
SGMS2	sphingomyelin synthase 2	protein-coding	4,42	5,78	-2,56	1,14E-10	9,49E-08
KLF4	Kruppel like factor 4	protein-coding	4,25	5,6	-2,54	5,46E-09	1,75E-06
ANO4	anoctamin 4	protein-coding	0,38	1,72	-2,54	7,01E-09	2,06E-06
GOLGA8B	golgin A8 family member B	protein-coding	4,3	5,62	-2,51	9,48E-11	9,26E-08
FZD4	frizzled class receptor 4	protein-coding	2,57	3,9	-2,51	1,20E-07	1,62E-05
KCTD16	potassium channel tetramerization domain containing 16	protein-coding	1,09	2,41	-2,5	8,20E-05	0,0019
C11orf96	chromosome 11 open reading frame 96	protein-coding	1,2	2,51	-2,49	5,39E-05	0,0014
TGFBR1	transforming growth factor beta receptor 1	protein-coding	6,12	7,44	-2,49	3,98E-09	1,40E-06
ANKRD1	ankyrin repeat domain 1	protein-coding	0,71	2,01	-2,46	0,0002	0,0036
DOCK11	dedicator of cytokinesis 11	protein-coding	4,46	5,75	-2,46	1,12E-10	9,49E-08
VCAN	versican	protein-coding	6,17	7,46	-2,46	1,19E-07	1,62E-05
TENM3-AS1	TENM3 antisense RNA 1	ncRNA	2,03	3,32	-2,45	0,0003	0,0048
ROR1	receptor tyrosine kinase like orphan receptor 1	protein-coding	4,18	5,47	-2,44	5,77E-06	0,0003
SNORA27	small nucleolar RNA, H/ACA box 27	snoRNA	3,67	4,95	-2,43	1,10E-06	8,12E-05
FAM126A	family with sequence similarity 126 member A	protein-coding	6,57	7,84	-2,41	1,02E-10	9,26E-08
CDKN2A	cyclin dependent kinase inhibitor 2A	protein-coding	0,97	2,23	-2,4	2,68E-05	0,0008
NEK7	NIMA related kinase 7	protein-coding	7,71	8,97	-2,39	5,26E-13	5,47E-09
GDF6	growth differentiation factor 6	protein-coding	1,47	2,73	-2,38	2,73E-05	0,0008
ATP8B1	ATPase phospholipid transporting 8B1	protein-coding	4,63	5,88	-2,38	3,44E-08	7,01E-06
LINC00312	long intergenic non-protein coding RNA 312	ncRNA	2,66	3,9	-2,37	3,04E-06	0,0002
HMGN1	high mobility group nucleosome binding domain 1	protein-coding	5,16	6,4	-2,36	2,44E-07	2,68E-05
F2R	coagulation factor II thrombin receptor	protein-coding	2,28	3,52	-2,35	6,02E-05	0,0015
LYPD6B	LY6/PLAUR domain containing 6B	protein-coding	1,29	2,52	-2,35	0,0003	0,0053
GOLGB1	golgin B1	protein-coding	5	6,22	-2,34	1,67E-10	1,34E-07
FAM133CP	family with sequence similarity 133, member A pseudogene	pseudo	1,51	2,73	-2,33	5,96E-07	5,30E-05
NLRP10	NLR family pyrin domain containing 10	protein-coding	1,24	2,45	-2,31	1,47E-05	0,0005
PLAAT3	phospholipase A and acyltransferase 3	protein-coding	3,69	4,89	-2,3	4,67E-05	0,0013
FOXC2	forkhead box C2	protein-coding	0,92	2,11	-2,28	8,02E-07	6,46E-05
SEMA3C	semaphorin 3C	protein-coding	7,05	8,24	-2,27	7,42E-07	6,13E-05
UACA	uveal autoantigen with coiled-coil domains and ankyrin repeats	protein-coding	5,61	6,79	-2,26	1,19E-08	3,03E-06
UTRN	utrophin	protein-coding	5,53	6,7	-2,25	2,21E-09	9,59E-07
ATP10D	ATPase phospholipid transporting 10D (putative)	protein-coding	4,02	5,19	-2,24	3,92E-10	2,40E-07
PGBD3	piggyBac transposable element derived 3	protein-coding	2,83	3,99	-2,23	2,30E-10	1,77E-07
PCSK6	proprotein convertase subtilisin/kexin type 6	protein-coding	0,32	1,47	-2,23	0,0006	0,0081
SLC35E2B	solute carrier family 35 member E2B	protein-coding	4,45	5,6	-2,22	3,23E-05	0,0010
SAMD3	sterile alpha motif domain containing 3	protein-coding	1,5	2,64	-2,2	2,01E-05	0,0007
WNT4	Wnt family member 4	protein-coding	0	1,14	-2,2	1,60E-06	0,0001
PLK2	polo like kinase 2	protein-coding	4,32	5,45	-2,18	1,20E-07	1,62E-05
CSRNP1	cysteine and serine rich nuclear protein 1	protein-coding	2,89	4,01	-2,18	3,12E-09	1,25E-06
NUAK1	NUAK family kinase 1	protein-coding	4,91	6,03	-2,17	3,54E-06	0,0002
ABLIM1	actin binding LIM protein 1	protein-coding	2,12	3,24	-2,17	0,0006	0,0076
GULP1	GULP PTB domain containing engulfment adaptor 1	protein-coding	3,13	4,25	-2,16	2,49E-05	0,0008
VGLL3	vestigial like family member 3	protein-coding	8,03	9,14	-2,15	8,04E-07	6,46E-05
ITPRIP	inositol 1,4,5-trisphosphate receptor interacting protein	protein-coding	1,43	2,54	-2,15	1,99E-08	4,61E-06
ADGRG6	adhesion G protein-coupled receptor G6	protein-coding	1,68	2,78	-2,14	0,0003	0,0054
DGKI	diacylglycerol kinase iota	protein-coding	1,69	2,78	-2,13	3,76E-07	3,69E-05
PTPRQ	protein tyrosine phosphatase receptor type Q	protein-coding	1,51	2,6	-2,13	1,27E-06	9,15E-05
NEXN	nexilin F-actin binding protein	protein-coding	5,08	6,17	-2,13	1,33E-09	6,77E-07
SORT1	sortilin 1	protein-coding	4,42	5,51	-2,12	3,65E-06	0,0002
BLID	BH3-like motif containing, cell death inducer	protein-coding	2,62	3,7	-2,12	3,65E-08	7,31E-06
THSD4	thrombospondin type 1 domain containing 4	protein-coding	3,39	4,47	-2,11	0,0003	0,0044
AKAP6	A-kinase anchoring protein 6	protein-coding	2,51	3,58	-2,1	0,0005	0,0068
PKD2	polycystin 2, transient receptor potential cation channel	protein-coding	6,27	7,33	-2,1	2,63E-10	1,90E-07
FABP3	fatty acid binding protein 3	protein-coding	0,74	1,8	-2,09	3,03E-05	0,0009
MFGE8	milk fat globule EGF and factor V/VIII domain containing	protein-coding	8,34	9,4	-2,08	0,0001	0,0023
FRY	FRY microtubule binding protein	protein-coding	3,55	4,6	-2,07	0,0001	0,0025
FMN2	formin 2	protein-coding	4,32	5,36	-2,06	2,56E-07	2,75E-05
DUSP1	dual specificity phosphatase 1	protein-coding	7,95	8,98	-2,05	7,28E-06	0,0003
PRSS12	serine protease 12	protein-coding	5,29	6,32	-2,04	5,64E-06	0,0003
RASSF2	Ras association domain family member 2	protein-coding	2,27	3,3	-2,04	4,26E-05	0,0012
NKTR	natural killer cell triggering receptor	protein-coding	3,47	4,5	-2,04	3,32E-10	2,20E-07
SLC7A5P2	solute carrier family 7 member 5 pseudogene 2	pseudo	2,16	3,18	-2,04	2,93E-07	3,02E-05
LRRC37A4P	leucine rich repeat containing 37 member A4, pseudogene	pseudo	1,6	2,63	-2,03	0,0002	0,0039
LINC01133	long intergenic non-protein coding RNA 1133	ncRNA	4,41	5,43	-2,03	1,70E-05	0,0006
SNORA70G	small nucleolar RNA, H/ACA box 70G	snoRNA	3,88	4,9	-2,03	1,31E-05	0,0005
CCDC80	coiled-coil domain containing 80	protein-coding	5,77	6,79	-2,03	1,70E-07	2,08E-05
MGAT5	alpha-1,6-mannosylglycoprotein 6-beta-N-acetylglucosaminyltransferase	protein-coding	3,79	4,8	-2,03	4,26E-08	7,84E-06
CLIC4	chloride intracellular channel 4	protein-coding	9,53	10,54	-2,01	4,18E-08	7,84E-06
STK38	serine/threonine kinase 38	protein-coding	4,87	5,88	-2,01	4,37E-12	9,09E-09
FOXE1	forkhead box E1	protein-coding	-0,09	0,92	-2,01	0,0003	0,0043
FZD8	frizzled class receptor 8	protein-coding	2,01	3,02	-2,01	6,94E-06	0,0003
FMN1	formin 1	protein-coding	3,88	4,88	-2	7,47E-05	0,0018
LYPD6	LY6/PLAUR domain containing 6	protein-coding	1,98	2,98	-2	0,0008	0,0096
ITGBL1	integrin subunit beta like 1	protein-coding	7,87	8,87	-2	1,78E-07	2,14E-05
AFAP1	actin filament associated protein 1	protein-coding	5,54	6,53	-2	7,66E-14	1,59E-09
DNAJB4	DnaJ heat shock protein family (Hsp40) member B4	protein-coding	5,16	6,16	-2	7,08E-05	0,0017
SPTAN1	spectrin alpha, non-erythrocytic 1	protein-coding	7,41	8,41	-2	1,02E-12	6,83E-09
PITX2	paired like homeodomain 2	protein-coding	1,44	2,43	-1,99	0,0003	0,0049
FSTL3	follistatin like 3	protein-coding	4,67	5,67	-1,99	1,05E-05	0,0004
RECQL	RecQ like helicase	protein-coding	3,53	4,52	-1,99	2,22E-07	2,51E-05
RGS2	regulator of G protein signaling 2	protein-coding	1,03	2,02	-1,98	1,90E-07	2,21E-05
DPF3	double PHD fingers 3	protein-coding	1,71	2,69	-1,98	1,66E-05	0,0006
SPINT2	serine peptidase inhibitor, Kunitz type 2	protein-coding	1,59	2,57	-1,98	0,0008	0,0099
NALCN	sodium leak channel, non-selective	protein-coding	1,48	2,47	-1,98	1,61E-05	0,0006
LMO7	LIM domain 7	protein-coding	7,81	8,79	-1,97	1,34E-06	9,47E-05
ATF3	activating transcription factor 3	protein-coding	2,66	3,64	-1,97	0,0001	0,0023
STK32B	serine/threonine kinase 32B	protein-coding	3,1	4,08	-1,97	0,0004	0,0054
SNORA70B	small nucleolar RNA, H/ACA box 70B	snoRNA	1,13	2,1	-1,97	7,57E-09	2,16E-06
SYT12	synaptotagmin 12	protein-coding	-0,07	0,9	-1,96	4,92E-09	1,65E-06
HES4	hes family bHLH transcription factor 4	protein-coding	0,84	1,82	-1,96	6,60E-07	5,61E-05
OSR2	odd-skipped related transciption factor 2	protein-coding	2,32	3,29	-1,96	0,0004	0,0063
VPS13A	vacuolar protein sorting 13 homolog A	protein-coding	3,66	4,62	-1,95	9,26E-07	7,12E-05
MTHFD1L	methylenetetrahydrofolate dehydrogenase (NADP+ dependent) 1 like	protein-coding	5,73	6,69	-1,95	1,63E-12	6,83E-09
ANKH	ANKH inorganic pyrophosphate transport regulator	protein-coding	4,31	5,27	-1,94	3,87E-07	3,78E-05
PEAK1	pseudopodium enriched atypical kinase 1	protein-coding	6,65	7,61	-1,94	1,46E-09	7,06E-07
SNORA70F	small nucleolar RNA, H/ACA box 70F	snoRNA	0,5	1,46	-1,94	2,04E-06	0,0001
FAM66D	family with sequence similarity 66 member D	ncRNA	1,11	2,07	-1,94	7,01E-07	5,91E-05
SULF2	sulfatase 2	protein-coding	4,46	5,41	-1,93	0,0007	0,0085
PDLIM5	PDZ and LIM domain 5	protein-coding	6,04	6,98	-1,93	3,46E-05	0,0010
BCAT1	branched chain amino acid transaminase 1	protein-coding	6,04	6,98	-1,92	9,34E-06	0,0004
RGPD2	RANBP2 like and GRIP domain containing 2	protein-coding	-0,14	0,8	-1,92	2,06E-07	2,34E-05
USP17L2	ubiquitin specific peptidase 17 like family member 2	protein-coding	1,25	2,19	-1,92	2,86E-06	0,0002
CEMIP	cell migration inducing hyaluronidase 1	protein-coding	8,84	9,78	-1,92	0,0007	0,0085
MAP3K7CL	MAP3K7 C-terminal like	protein-coding	4,26	5,2	-1,92	0,0004	0,0061
SNAI1	snail family transcriptional repressor 1	protein-coding	4,29	5,23	-1,92	1,16E-05	0,0004
UBE2Q2P1	ubiquitin conjugating enzyme E2 Q2 pseudogene 1	pseudo	3,16	4,09	-1,92	8,04E-09	2,26E-06
LINC02969	long intergenic non-protein coding RNA 2969	ncRNA	2,14	3,07	-1,91	9,56E-08	1,47E-05
LENG8	leukocyte receptor cluster member 8	protein-coding	6,45	7,38	-1,91	7,75E-11	8,07E-08
DBNDD2	dysbindin domain containing 2	protein-coding	4,03	4,96	-1,91	7,07E-06	0,0003
LOC90246	uncharacterized LOC90246	ncRNA	1,16	2,09	-1,91	3,99E-06	0,0002
PER1	period circadian regulator 1	protein-coding	5,1	6,03	-1,9	1,29E-05	0,0005
HSPH1	heat shock protein family H (Hsp110) member 1	protein-coding	3,52	4,45	-1,9	7,98E-07	6,46E-05
KMT2A	lysine methyltransferase 2A	protein-coding	5,26	6,19	-1,9	1,59E-09	7,52E-07
VTN	vitronectin	protein-coding	0,48	1,4	-1,9	1,43E-05	0,0005
SETD7	SET domain containing 7, histone lysine methyltransferase	protein-coding	6,38	7,3	-1,89	3,11E-09	1,25E-06
HEATR5A	HEAT repeat containing 5A	protein-coding	4,67	5,59	-1,89	2,98E-10	2,07E-07
RNF150	ring finger protein 150	protein-coding	4,26	5,17	-1,88	0,0001	0,0027
OLFM1	olfactomedin 1	protein-coding	2,65	3,56	-1,88	0,0004	0,0062
SLC7A6	solute carrier family 7 member 6	protein-coding	3,79	4,7	-1,88	1,64E-12	6,83E-09
PLXNA2	plexin A2	protein-coding	3,36	4,27	-1,88	6,19E-05	0,0016
CRYGS	crystallin gamma S	protein-coding	0,92	1,82	-1,87	7,57E-10	4,26E-07
OSR1	odd-skipped related transcription factor 1	protein-coding	4,46	5,36	-1,87	0,0002	0,0033
EBF1	EBF transcription factor 1	protein-coding	4,43	5,33	-1,87	3,74E-06	0,0002
TAS2R14	taste 2 receptor member 14	protein-coding	2,03	2,93	-1,86	3,79E-09	1,36E-06
XG	Xg glycoprotein (Xg blood group)	protein-coding	2,71	3,61	-1,86	4,69E-05	0,0013
C1orf198	chromosome 1 open reading frame 198	protein-coding	7	7,9	-1,86	2,99E-05	0,0009
DYNLT4	dynein light chain Tctex-type 4	protein-coding	1,83	2,73	-1,86	4,36E-06	0,0002
HRCT1	histidine rich carboxyl terminus 1	protein-coding	1,07	1,96	-1,86	0,0002	0,0035
THAP9-AS1	THAP9 antisense RNA 1	ncRNA	5,61	6,5	-1,86	7,31E-08	1,21E-05
NFYB	nuclear transcription factor Y subunit beta	protein-coding	4,85	5,74	-1,85	3,08E-06	0,0002
KLF2	Kruppel like factor 2	protein-coding	3,48	4,36	-1,85	8,89E-05	0,0020
OPTN	optineurin	protein-coding	6,01	6,9	-1,85	5,06E-08	9,00E-06
RPL21P44	ribosomal protein L21 pseudogene 44	pseudo	0,3	1,18	-1,85	3,45E-11	4,79E-08
BTG2	BTG anti-proliferation factor 2	protein-coding	2,67	3,56	-1,85	2,44E-05	0,0008
PARD3B	par-3 family cell polarity regulator beta	protein-coding	4,51	5,39	-1,84	0,0001	0,0028
MPRIP	myosin phosphatase Rho interacting protein	protein-coding	6,7	7,59	-1,84	1,28E-06	9,15E-05
FLJ42393	uncharacterized LOC401105	ncRNA	1,5	2,38	-1,84	1,44E-06	9,90E-05
RABGEF1	RAB guanine nucleotide exchange factor 1	protein-coding	4,72	5,59	-1,84	2,27E-12	7,88E-09
FAT1	FAT atypical cadherin 1	protein-coding	7,26	8,14	-1,84	7,33E-06	0,0003
SLC36A1	solute carrier family 36 member 1	protein-coding	3,36	4,24	-1,84	1,56E-07	1,96E-05
LOC145474	uncharacterized LOC145474	ncRNA	0,53	1,4	-1,83	1,15E-07	1,62E-05
RECK	reversion inducing cysteine rich protein with kazal motifs	protein-coding	7,75	8,62	-1,83	0,0006	0,0080
RGPD1	RANBP2 like and GRIP domain containing 1	protein-coding	0,57	1,45	-1,83	0,0002	0,0039
LINC00641	long intergenic non-protein coding RNA 641	ncRNA	3,42	4,29	-1,83	8,15E-10	4,46E-07
RPL13AP6	ribosomal protein L13a pseudogene 6	pseudo	1,25	2,12	-1,83	9,58E-07	7,28E-05
ANXA3	annexin A3	protein-coding	0,57	1,43	-1,82	4,76E-05	0,0013
CHMP1B	charged multivesicular body protein 1B	protein-coding	6,39	7,25	-1,82	1,69E-09	7,81E-07
CHPF	chondroitin polymerizing factor	protein-coding	6,91	7,77	-1,81	4,27E-07	4,00E-05
CBLB	Cbl proto-oncogene B	protein-coding	3,89	4,75	-1,81	5,34E-06	0,0003
PLK3	polo like kinase 3	protein-coding	3,4	4,26	-1,81	1,58E-07	1,97E-05
SNORA46	small nucleolar RNA, H/ACA box 46	snoRNA	3,17	4,02	-1,81	0,0008	0,0099
SSB	small RNA binding exonuclease protection factor La	protein-coding	5,34	6,19	-1,8	1,83E-06	0,0001
LRRFIP1	LRR binding FLII interacting protein 1	protein-coding	5,91	6,77	-1,8	1,52E-06	0,0001
WWC3	WWC family member 3	protein-coding	4,5	5,35	-1,8	9,75E-09	2,60E-06
FZD6	frizzled class receptor 6	protein-coding	4,98	5,82	-1,8	4,53E-05	0,0012
KLF10	Kruppel like factor 10	protein-coding	5,13	5,98	-1,8	2,06E-05	0,0007
CYCSP52	CYCS pseudogene 52	pseudo	0,86	1,7	-1,79	3,48E-08	7,04E-06
PTK2B	protein tyrosine kinase 2 beta	protein-coding	3,16	4,01	-1,79	0,0006	0,0080
MAMLD1	mastermind like domain containing 1	protein-coding	3,76	4,6	-1,79	0,0002	0,0036
PLEKHG3	pleckstrin homology and RhoGEF domain containing G3	protein-coding	2,14	2,98	-1,79	1,82E-06	0,0001
ARHGAP5	Rho GTPase activating protein 5	protein-coding	5,82	6,65	-1,79	1,75E-08	4,23E-06
ANKRD44	ankyrin repeat domain 44	protein-coding	1,75	2,59	-1,79	3,08E-08	6,42E-06
LINC00672	long intergenic non-protein coding RNA 672	ncRNA	0,98	1,82	-1,79	1,38E-08	3,38E-06
PHLDB2	pleckstrin homology like domain family B member 2	protein-coding	3,78	4,62	-1,79	6,95E-06	0,0003
LINC01013	long intergenic non-protein coding RNA 1013	ncRNA	0,43	1,27	-1,79	0,0004	0,0060
GNPTAB	N-acetylglucosamine-1-phosphate transferase subunits alpha and beta	protein-coding	4,24	5,08	-1,78	1,11E-06	8,14E-05
PIGA	phosphatidylinositol glycan anchor biosynthesis class A	protein-coding	2,22	3,06	-1,78	3,53E-09	1,29E-06
FNIP2	folliculin interacting protein 2	protein-coding	4,01	4,84	-1,78	1,06E-06	7,92E-05
TMEM11	transmembrane protein 11	protein-coding	3,38	4,21	-1,78	0,0001	0,0028
SLC7A5P1	solute carrier family 7 member 5 pseudogene 1	pseudo	2,9	3,73	-1,78	4,09E-07	3,94E-05
TAS2R30	taste 2 receptor member 30	protein-coding	0,51	1,34	-1,78	1,71E-07	2,08E-05
ATXN2	ataxin 2	protein-coding	5,87	6,7	-1,77	2,00E-07	2,30E-05
SCARNA17	small Cajal body-specific RNA 17	ncRNA	5,53	6,35	-1,77	1,24E-07	1,66E-05
CALD1	caldesmon 1	protein-coding	9,14	9,96	-1,77	0,0003	0,0050
STK38L	serine/threonine kinase 38 like	protein-coding	3,86	4,68	-1,77	0,0002	0,0038
MPHOSPH8	M-phase phosphoprotein 8	protein-coding	4,48	5,3	-1,77	6,71E-08	1,13E-05
CCN2	cellular communication network factor 2	protein-coding	10,16	10,98	-1,77	0,0004	0,0057
TMEM117	transmembrane protein 117	protein-coding	3,25	4,07	-1,77	6,52E-07	5,60E-05
FERMT2	FERM domain containing kindlin 2	protein-coding	7,08	7,91	-1,77	2,59E-05	0,0008
ATP6V0A1	ATPase H+ transporting V0 subunit a1	protein-coding	4,49	5,31	-1,77	5,81E-06	0,0003
CCNL2	cyclin L2	protein-coding	4,68	5,5	-1,77	2,47E-07	2,69E-05
NNMT	nicotinamide N-methyltransferase	protein-coding	8,33	9,15	-1,77	2,04E-06	0,0001
FHL2	four and a half LIM domains 2	protein-coding	7,96	8,78	-1,76	9,85E-07	7,44E-05
NEDD9	neural precursor cell expressed, developmentally down-regulated 9	protein-coding	4,29	5,11	-1,76	0,0003	0,0050
PTPN12	protein tyrosine phosphatase non-receptor type 12	protein-coding	6,47	7,28	-1,76	7,28E-06	0,0003
ABCA10	ATP binding cassette subfamily A member 10	protein-coding	1,12	1,93	-1,76	3,71E-05	0,0011
AHSA2P	activator of HSP90 ATPase homolog 2, pseudogene	pseudo	3,92	4,74	-1,76	4,90E-07	4,47E-05
ORMDL1	ORMDL sphingolipid biosynthesis regulator 1	protein-coding	4,18	4,99	-1,76	5,52E-08	9,57E-06
LPCAT2	lysophosphatidylcholine acyltransferase 2	protein-coding	3,91	4,73	-1,76	4,52E-05	0,0012
KAZALD1	Kazal type serine peptidase inhibitor domain 1	protein-coding	2	2,81	-1,76	0,0003	0,0051
NGEF	neuronal guanine nucleotide exchange factor	protein-coding	0,06	0,87	-1,76	0,0003	0,0051
LINC01018	long intergenic non-protein coding RNA 1018	ncRNA	-0,01	0,8	-1,75	0,0007	0,0089
DST	dystonin	protein-coding	6,97	7,78	-1,75	4,80E-05	0,0013
CARMIL1	capping protein regulator and myosin 1 linker 1	protein-coding	2,26	3,07	-1,75	1,40E-06	9,68E-05
PLEKHA3	pleckstrin homology domain containing A3	protein-coding	4,17	4,98	-1,75	9,50E-05	0,0021
NEK10	NIMA related kinase 10	protein-coding	2,02	2,83	-1,75	3,87E-06	0,0002
ZFC3H1	zinc finger C3H1-type containing	protein-coding	4,03	4,84	-1,75	1,42E-07	1,83E-05
CAPN3	calpain 3	protein-coding	1,85	2,65	-1,75	3,09E-07	3,14E-05
RASSF8-AS1	RASSF8 antisense RNA 1	ncRNA	2,86	3,67	-1,75	3,44E-07	3,43E-05
GGCT	gamma-glutamylcyclotransferase	protein-coding	3,46	4,26	-1,75	9,86E-07	7,44E-05
RHPN2	rhophilin Rho GTPase binding protein 2	protein-coding	2	2,8	-1,75	3,14E-05	0,0009
SEMA4A	semaphorin 4A	protein-coding	1,67	2,47	-1,74	9,69E-06	0,0004
PFN1P2	profilin 1 pseudogene 2	pseudo	3,06	3,86	-1,74	5,28E-07	4,76E-05
RALGAPA1	Ral GTPase activating protein catalytic subunit alpha 1	protein-coding	3,01	3,81	-1,74	1,30E-08	3,22E-06
MAP3K1	mitogen-activated protein kinase kinase kinase 1	protein-coding	3,19	3,99	-1,73	2,92E-05	0,0009
ABCA5	ATP binding cassette subfamily A member 5	protein-coding	3,65	4,44	-1,73	0,0002	0,0033
LDHAL6B	lactate dehydrogenase A like 6B	protein-coding	2,05	2,84	-1,73	0,0002	0,0040
ZFR	zinc finger RNA binding protein	protein-coding	5,74	6,53	-1,73	6,34E-07	5,52E-05
TTC37	tetratricopeptide repeat domain 37	protein-coding	4,86	5,65	-1,73	0,0002	0,0035
TAS2R19	taste 2 receptor member 19	protein-coding	1,6	2,4	-1,73	3,78E-06	0,0002
BTBD1	BTB domain containing 1	protein-coding	6,83	7,62	-1,73	2,06E-08	4,70E-06
PIK3C2B	phosphatidylinositol-4-phosphate 3-kinase catalytic subunit type 2 beta	protein-coding	1,18	1,97	-1,73	6,21E-06	0,0003
SYNM	synemin	protein-coding	1,96	2,74	-1,73	1,80E-06	0,0001
GLIS2	GLIS family zinc finger 2	protein-coding	5,43	6,22	-1,73	1,43E-07	1,83E-05
EP300	E1A binding protein p300	protein-coding	4,01	4,8	-1,72	1,18E-08	3,03E-06
NDFIP2	Nedd4 family interacting protein 2	protein-coding	4,75	5,53	-1,72	1,38E-06	9,59E-05
ZRANB2	zinc finger RANBP2-type containing 2	protein-coding	2,08	2,86	-1,72	1,86E-08	4,45E-06
PCYOX1	prenylcysteine oxidase 1	protein-coding	5,98	6,77	-1,72	5,19E-06	0,0003
PTAR1	protein prenyltransferase alpha subunit repeat containing 1	protein-coding	3,8	4,59	-1,72	2,75E-07	2,86E-05
KIAA1671	KIAA1671	protein-coding	0,93	1,71	-1,72	8,40E-05	0,0019
SETX	senataxin	protein-coding	5,45	6,22	-1,72	4,56E-07	4,21E-05
NEGR1	neuronal growth regulator 1	protein-coding	4,29	5,07	-1,72	4,65E-05	0,0013
TBC1D2	TBC1 domain family member 2	protein-coding	3,24	4,02	-1,72	4,03E-05	0,0011
ZNF10	zinc finger protein 10	protein-coding	0,97	1,75	-1,72	1,10E-07	1,57E-05
GLS	glutaminase	protein-coding	8,41	9,19	-1,72	8,35E-06	0,0003
ARID4B	AT-rich interaction domain 4B	protein-coding	4,34	5,11	-1,71	6,87E-09	2,06E-06
FUS	FUS RNA binding protein	protein-coding	5,49	6,27	-1,71	8,08E-06	0,0003
MBNL2	muscleblind like splicing regulator 2	protein-coding	7,49	8,26	-1,7	8,89E-05	0,0020
RPGRIP1L	RPGRIP1 like	protein-coding	3,02	3,79	-1,7	8,14E-08	1,30E-05
ITGB5	integrin subunit beta 5	protein-coding	6,82	7,59	-1,7	0,0002	0,0035
CBX1	chromobox 1	protein-coding	2,18	2,95	-1,7	2,47E-05	0,0008
TAS2R20	taste 2 receptor member 20	protein-coding	0,91	1,68	-1,7	1,03E-06	7,70E-05
STAMBPL1	STAM binding protein like 1	protein-coding	3,15	3,92	-1,7	1,33E-05	0,0005
LINC00174	long intergenic non-protein coding RNA 174	ncRNA	1,18	1,94	-1,7	7,41E-09	2,14E-06
ANKIB1	ankyrin repeat and IBR domain containing 1	protein-coding	5,97	6,73	-1,7	1,33E-05	0,0005
LYRM9	LYR motif containing 9	protein-coding	2,62	3,38	-1,7	2,38E-05	0,0008
DCLK2	doublecortin like kinase 2	protein-coding	2,53	3,29	-1,69	0,0001	0,0029
SKIL	SKI like proto-oncogene	protein-coding	6,11	6,87	-1,69	0,0001	0,0026
ATP10A	ATPase phospholipid transporting 10A (putative)	protein-coding	5,13	5,88	-1,69	0,0001	0,0028
KMT2C	lysine methyltransferase 2C	protein-coding	3,96	4,72	-1,69	9,55E-09	2,58E-06
ZNF84	zinc finger protein 84	protein-coding	3,58	4,33	-1,68	1,08E-07	1,57E-05
LRRC1	leucine rich repeat containing 1	protein-coding	0,87	1,62	-1,68	2,03E-06	0,0001
MAP2K3	mitogen-activated protein kinase kinase 3	protein-coding	5,15	5,9	-1,68	6,14E-06	0,0003
INTU	inturned planar cell polarity protein	protein-coding	2,76	3,51	-1,68	5,53E-05	0,0014
PRR14L	proline rich 14 like	protein-coding	4,24	4,99	-1,68	5,86E-08	1,00E-05
BMP4	bone morphogenetic protein 4	protein-coding	0,01	0,76	-1,68	5,99E-05	0,0015
GIGYF2	GRB10 interacting GYF protein 2	protein-coding	5,43	6,18	-1,68	4,27E-06	0,0002
ANKRD29	ankyrin repeat domain 29	protein-coding	1,36	2,11	-1,68	5,22E-05	0,0014
SRSF5	serine and arginine rich splicing factor 5	protein-coding	7,88	8,63	-1,68	3,87E-08	7,60E-06
N4BP2L2	NEDD4 binding protein 2 like 2	protein-coding	3,75	4,5	-1,68	0,0001	0,0024
AHI1	Abelson helper integration site 1	protein-coding	3,81	4,55	-1,68	9,64E-08	1,47E-05
FOXC1	forkhead box C1	protein-coding	2,95	3,69	-1,68	0,0005	0,0065
EFHC1	EF-hand domain containing 1	protein-coding	2,92	3,67	-1,67	2,30E-07	2,54E-05
TMEM178B	transmembrane protein 178B	protein-coding	-0,1	0,65	-1,67	7,44E-05	0,0018
PABPC1L	poly(A) binding protein cytoplasmic 1 like	protein-coding	2,61	3,35	-1,67	2,48E-07	2,69E-05
GANC	glucosidase alpha, neutral C	protein-coding	3,26	4	-1,67	4,30E-08	7,84E-06
CCNH	cyclin H	protein-coding	3,84	4,58	-1,67	6,55E-05	0,0016
REEP3	receptor accessory protein 3	protein-coding	4,6	5,34	-1,67	2,94E-06	0,0002
LANCL1	LanC like 1	protein-coding	4,9	5,64	-1,67	0,0002	0,0036
DDX5	DEAD-box helicase 5	protein-coding	8,2	8,94	-1,67	3,39E-10	2,20E-07
PAPSS2	3'-phosphoadenosine 5'-phosphosulfate synthase 2	protein-coding	3,02	3,76	-1,67	0,0006	0,0076
SIPA1L1	signal induced proliferation associated 1 like 1	protein-coding	5,09	5,82	-1,67	1,83E-07	2,15E-05
PILRB	paired immunoglobin like type 2 receptor beta	protein-coding	2,97	3,7	-1,67	3,14E-07	3,18E-05
PLEKHH2	pleckstrin homology, MyTH4 and FERM domain containing H2	protein-coding	2,18	2,92	-1,67	6,87E-06	0,0003
OCLNP1	OCLN pseudogene 1	pseudo	0,65	1,39	-1,67	0,0007	0,0086
TENT2	terminal nucleotidyltransferase 2	protein-coding	4,59	5,32	-1,66	6,13E-07	5,36E-05
ZNF300	zinc finger protein 300	protein-coding	1,98	2,71	-1,66	8,14E-09	2,26E-06
CLK4	CDC like kinase 4	protein-coding	1,55	2,29	-1,66	4,89E-05	0,0013
PPP1CC	protein phosphatase 1 catalytic subunit gamma	protein-coding	6,6	7,33	-1,66	2,87E-05	0,0009
FOXO1	forkhead box O1	protein-coding	3,2	3,93	-1,66	2,97E-06	0,0002
FRS2	fibroblast growth factor receptor substrate 2	protein-coding	4,82	5,55	-1,66	1,28E-06	9,15E-05
DDHD2	DDHD domain containing 2	protein-coding	4,56	5,29	-1,66	1,62E-07	2,00E-05
CMAHP	cytidine monophospho-N-acetylneuraminic acid hydroxylase, pseudogene	pseudo	2,35	3,08	-1,66	0,0005	0,0068
SH3BP5	SH3 domain binding protein 5	protein-coding	5,6	6,33	-1,66	0,0005	0,0071
CUL4B	cullin 4B	protein-coding	7,5	8,23	-1,66	2,81E-05	0,0009
TJP1	tight junction protein 1	protein-coding	4,42	5,15	-1,66	9,09E-10	4,85E-07
NBR2	neighbor of BRCA1 lncRNA 2	ncRNA	3,47	4,2	-1,66	6,41E-05	0,0016
GALNT7	polypeptide N-acetylgalactosaminyltransferase 7	protein-coding	3,74	4,46	-1,65	1,99E-06	0,0001
TNNC2	troponin C2, fast skeletal type	protein-coding	1,1	1,83	-1,65	0,0001	0,0023
PWAR5	Prader Willi/Angelman region RNA 5	ncRNA	1,46	2,19	-1,65	5,92E-06	0,0003
MED23	mediator complex subunit 23	protein-coding	2,92	3,64	-1,65	1,34E-07	1,76E-05
TMEM131L	transmembrane 131 like	protein-coding	3,89	4,61	-1,65	1,35E-06	9,53E-05
CDC73	cell division cycle 73	protein-coding	4,78	5,5	-1,65	3,12E-05	0,0009
MAP4K5	mitogen-activated protein kinase kinase kinase kinase 5	protein-coding	4,64	5,36	-1,65	1,91E-06	0,0001
PTP4A1	protein tyrosine phosphatase 4A1	protein-coding	5,52	6,24	-1,65	1,14E-05	0,0004
L2HGDH	L-2-hydroxyglutarate dehydrogenase	protein-coding	1,39	2,11	-1,65	1,83E-09	8,11E-07
BEND3P3	BEN domain containing 3 pseudogene 3	pseudo	2,3	3,02	-1,65	1,22E-06	8,80E-05
PRPF18	pre-mRNA processing factor 18	protein-coding	3,48	4,2	-1,65	1,21E-08	3,03E-06
SNX3	sorting nexin 3	protein-coding	7,83	8,55	-1,64	5,86E-05	0,0015
LINC02893	long intergenic non-protein coding RNA 2893	ncRNA	1,91	2,62	-1,64	0,0004	0,0059
SMG1P3	SMG1 pseudogene 3	pseudo	5,57	6,29	-1,64	6,87E-06	0,0003
DENND1A	DENN domain containing 1A	protein-coding	4,99	5,71	-1,64	4,15E-06	0,0002
MAF	MAF bZIP transcription factor	protein-coding	0,5	1,22	-1,64	1,47E-05	0,0005
SRGAP2B	SLIT-ROBO Rho GTPase activating protein 2B	protein-coding	1,4	2,11	-1,64	5,40E-06	0,0003
RIOK2	RIO kinase 2	protein-coding	4,14	4,85	-1,63	2,27E-06	0,0001
MYH10	myosin heavy chain 10	protein-coding	6,53	7,24	-1,63	3,95E-05	0,0011
RHOB	ras homolog family member B	protein-coding	5,71	6,42	-1,63	0,0005	0,0073
TAS2R50	taste 2 receptor member 50	protein-coding	0,38	1,09	-1,63	1,09E-07	1,57E-05
STK39	serine/threonine kinase 39	protein-coding	4,85	5,56	-1,63	5,59E-06	0,0003
INSIG2	insulin induced gene 2	protein-coding	4,06	4,77	-1,63	6,39E-06	0,0003
AP3B1	adaptor related protein complex 3 subunit beta 1	protein-coding	5	5,71	-1,63	5,48E-09	1,75E-06
MYEF2	myelin expression factor 2	protein-coding	0,89	1,6	-1,63	0,0003	0,0054
GCNT4	glucosaminyl (N-acetyl) transferase 4	protein-coding	0,29	0,99	-1,63	2,40E-06	0,0001
CEACAM19	CEA cell adhesion molecule 19	protein-coding	3,07	3,78	-1,63	1,29E-05	0,0005
ATRX	ATRX chromatin remodeler	protein-coding	4,11	4,81	-1,62	0,0002	0,0035
YBX1	Y-box binding protein 1	protein-coding	8,63	9,33	-1,62	0,0004	0,0061
KIAA1549L	KIAA1549 like	protein-coding	3,78	4,48	-1,62	0,0001	0,0028
SAMD9	sterile alpha motif domain containing 9	protein-coding	2,26	2,96	-1,62	0,0008	0,0097
VDAC3	voltage dependent anion channel 3	protein-coding	5,76	6,46	-1,62	5,86E-06	0,0003
STING1	stimulator of interferon response cGAMP interactor 1	protein-coding	4,84	5,53	-1,62	5,80E-06	0,0003
IDS	iduronate 2-sulfatase	protein-coding	6,65	7,35	-1,62	6,94E-09	2,06E-06
DCUN1D1	defective in cullin neddylation 1 domain containing 1	protein-coding	4,7	5,39	-1,62	5,76E-06	0,0003
ZFP36	ZFP36 ring finger protein	protein-coding	6,21	6,9	-1,62	0,0002	0,0035
EPS8L2	EPS8 like 2	protein-coding	3,29	3,99	-1,62	6,59E-05	0,0016
MRPS30	mitochondrial ribosomal protein S30	protein-coding	4,65	5,35	-1,62	0,0001	0,0027
LRRC41	leucine rich repeat containing 41	protein-coding	4,48	5,17	-1,62	1,37E-06	9,59E-05
DOCK7	dedicator of cytokinesis 7	protein-coding	5,53	6,23	-1,62	9,83E-08	1,47E-05
GRK5	G protein-coupled receptor kinase 5	protein-coding	4,86	5,55	-1,61	0,0001	0,0026
GDPD5	glycerophosphodiester phosphodiesterase domain containing 5	protein-coding	2,68	3,37	-1,61	2,66E-06	0,0002
MUC1	mucin 1, cell surface associated	protein-coding	3,55	4,24	-1,61	8,36E-05	0,0019
DNAH1	dynein axonemal heavy chain 1	protein-coding	1,34	2,03	-1,61	6,45E-06	0,0003
SCRN3	secernin 3	protein-coding	2,78	3,47	-1,61	3,10E-06	0,0002
ECHDC2	enoyl-CoA hydratase domain containing 2	protein-coding	3,24	3,93	-1,61	1,06E-05	0,0004
MXRA7	matrix remodeling associated 7	protein-coding	4,81	5,5	-1,61	9,09E-05	0,0021
JMJD1C	jumonji domain containing 1C	protein-coding	4,14	4,83	-1,61	4,75E-06	0,0002
CLIP4	CAP-Gly domain containing linker protein family member 4	protein-coding	5,56	6,24	-1,61	0,0003	0,0046
SMCR8	SMCR8-C9orf72 complex subunit	protein-coding	4,62	5,3	-1,61	6,41E-06	0,0003
ZNF708	zinc finger protein 708	protein-coding	2,97	3,65	-1,61	5,86E-09	1,82E-06
DCAF13P3	DDB1 and CUL4 associated factor 13 pseudogene 3	pseudo	0,97	1,66	-1,61	8,63E-07	6,80E-05
CENATAC	centrosomal AT-AC splicing factor	protein-coding	3,21	3,89	-1,6	3,62E-06	0,0002
PIK3R2	phosphoinositide-3-kinase regulatory subunit 2	protein-coding	6,11	6,8	-1,6	7,40E-05	0,0018
CORO6	coronin 6	protein-coding	1,75	2,43	-1,6	3,99E-06	0,0002
BTBD3	BTB domain containing 3	protein-coding	3,76	4,44	-1,6	0,0001	0,0028
RANBP17	RAN binding protein 17	protein-coding	4,64	5,32	-1,6	0,0008	0,0096
SEC11A	SEC11 homolog A, signal peptidase complex subunit	protein-coding	6,32	7	-1,6	0,0002	0,0041
SEC24A	SEC24 homolog A, COPII coat complex component	protein-coding	4,72	5,4	-1,6	6,88E-06	0,0003
JAK1	Janus kinase 1	protein-coding	7,1	7,78	-1,6	0,0002	0,0041
PTPRF	protein tyrosine phosphatase receptor type F	protein-coding	5,18	5,86	-1,6	2,76E-05	0,0009
TMPPE	transmembrane protein with metallophosphoesterase domain	protein-coding	1,81	2,49	-1,6	7,74E-08	1,26E-05
UBR1	ubiquitin protein ligase E3 component n-recognin 1	protein-coding	3,67	4,35	-1,6	1,04E-05	0,0004
SMIM14	small integral membrane protein 14	protein-coding	5,57	6,25	-1,6	4,21E-08	7,84E-06
BIRC6	baculoviral IAP repeat containing 6	protein-coding	5,14	5,82	-1,6	1,96E-08	4,61E-06
LRRC37A3	leucine rich repeat containing 37 member A3	protein-coding	1,46	2,13	-1,6	5,93E-05	0,0015
DDX60L	DExD/H-box 60 like	protein-coding	3,82	4,49	-1,6	3,66E-05	0,0011
TBC1D12	TBC1 domain family member 12	protein-coding	4,31	4,99	-1,6	2,31E-05	0,0008
ETF1	eukaryotic translation termination factor 1	protein-coding	5,42	6,09	-1,59	1,42E-05	0,0005
DPP8	dipeptidyl peptidase 8	protein-coding	3,96	4,64	-1,59	1,05E-05	0,0004
EPRS1	glutamyl-prolyl-tRNA synthetase 1	protein-coding	7,21	7,88	-1,59	7,92E-06	0,0003
AGA	aspartylglucosaminidase	protein-coding	4,56	5,23	-1,59	5,22E-05	0,0014
DMD	dystrophin	protein-coding	-0,13	0,54	-1,59	0,0002	0,0034
EBLN2	endogenous Bornavirus like nucleoprotein 2	protein-coding	0,95	1,62	-1,59	9,61E-08	1,47E-05
SLC25A4	solute carrier family 25 member 4	protein-coding	4,78	5,45	-1,59	0,0002	0,0041
AP1G2	adaptor related protein complex 1 subunit gamma 2	protein-coding	2,7	3,37	-1,59	8,59E-05	0,0020
RAPH1	Ras association (RalGDS/AF-6) and pleckstrin homology domains 1	protein-coding	5,54	6,21	-1,59	0,0006	0,0075
GNB4	G protein subunit beta 4	protein-coding	4,05	4,72	-1,59	1,64E-06	0,0001
SLC29A1	solute carrier family 29 member 1 (Augustine blood group)	protein-coding	3,13	3,8	-1,59	0,0007	0,0087
KCNK6	potassium two pore domain channel subfamily K member 6	protein-coding	1,15	1,82	-1,59	0,0002	0,0037
WDR47	WD repeat domain 47	protein-coding	3,97	4,64	-1,59	6,59E-07	5,61E-05
INTS3	integrator complex subunit 3	protein-coding	5,2	5,87	-1,59	1,14E-05	0,0004
UBN2	ubinuclein 2	protein-coding	3,26	3,93	-1,59	7,97E-06	0,0003
UFL1	UFM1 specific ligase 1	protein-coding	4,58	5,25	-1,59	9,71E-05	0,0021
PLA2G12A	phospholipase A2 group XIIA	protein-coding	3,99	4,65	-1,59	1,35E-07	1,76E-05
AXIN2	axin 2	protein-coding	2,07	2,73	-1,59	0,0004	0,0060
SF3B1	splicing factor 3b subunit 1	protein-coding	7,27	7,94	-1,59	9,81E-08	1,47E-05
BLZF1	basic leucine zipper nuclear factor 1	protein-coding	4,85	5,51	-1,59	0,0004	0,0060
HHIP	hedgehog interacting protein	protein-coding	-0,23	0,44	-1,58	3,50E-05	0,0010
ST7	suppression of tumorigenicity 7	protein-coding	4,31	4,97	-1,58	2,42E-06	0,0001
FBXO3	F-box protein 3	protein-coding	4,8	5,47	-1,58	7,74E-07	6,32E-05
SLC38A1	solute carrier family 38 member 1	protein-coding	4,34	5	-1,58	0,0002	0,0036
XPO4	exportin 4	protein-coding	3,19	3,85	-1,58	3,83E-08	7,60E-06
CCDC148	coiled-coil domain containing 148	protein-coding	0,45	1,11	-1,58	4,71E-05	0,0013
RAB40AL	RAB40A like	protein-coding	0,29	0,95	-1,58	4,92E-08	8,82E-06
LINC00597	long intergenic non-protein coding RNA 597	ncRNA	1,04	1,7	-1,58	3,87E-05	0,0011
ANKRD36	ankyrin repeat domain 36	protein-coding	3,6	4,26	-1,58	0,0008	0,0093
EXOC6	exocyst complex component 6	protein-coding	1,02	1,68	-1,58	1,38E-05	0,0005
MAN2A1	mannosidase alpha class 2A member 1	protein-coding	6,44	7,09	-1,58	2,19E-06	0,0001
POU5F2	POU domain class 5, transcription factor 2	protein-coding	0,07	0,72	-1,58	6,89E-11	7,55E-08
PGRMC2	progesterone receptor membrane component 2	protein-coding	6,55	7,21	-1,58	0,0002	0,0034
ANKRD36B	ankyrin repeat domain 36B	protein-coding	2,49	3,14	-1,58	0,0005	0,0070
LTBP3	latent transforming growth factor beta binding protein 3	protein-coding	7,63	8,28	-1,58	3,70E-06	0,0002
ADAM9	ADAM metallopeptidase domain 9	protein-coding	7,17	7,83	-1,57	2,51E-05	0,0008
FOXD2-AS1	FOXD2 adjacent opposite strand RNA 1	ncRNA	0,98	1,63	-1,57	1,82E-07	2,15E-05
HTT	huntingtin	protein-coding	3,88	4,54	-1,57	1,11E-05	0,0004
SNORA55	small nucleolar RNA, H/ACA box 55	snoRNA	2,81	3,46	-1,57	5,41E-06	0,0003
MAP3K14	mitogen-activated protein kinase kinase kinase 14	protein-coding	2,11	2,76	-1,57	4,55E-05	0,0012
MCU	mitochondrial calcium uniporter	protein-coding	2,94	3,6	-1,57	3,97E-07	3,84E-05
KCNQ1OT1	KCNQ1 opposite strand/antisense transcript 1	ncRNA	4,26	4,91	-1,57	5,36E-05	0,0014
LINC01963	long intergenic non-protein coding RNA 1963	ncRNA	3,47	4,12	-1,57	0,0007	0,0086
SNX30	sorting nexin family member 30	protein-coding	5,25	5,91	-1,57	7,33E-06	0,0003
LINC01347	long intergenic non-protein coding RNA 1347	ncRNA	2,64	3,29	-1,57	1,34E-05	0,0005
PCGF5	polycomb group ring finger 5	protein-coding	4,13	4,78	-1,57	8,54E-06	0,0004
PRMT9	protein arginine methyltransferase 9	protein-coding	1,74	2,4	-1,57	4,99E-09	1,65E-06
ZBTB41	zinc finger and BTB domain containing 41	protein-coding	4,34	4,99	-1,57	8,99E-05	0,0020
SCAND2P	SCAN domain containing 2 pseudogene	pseudo	1,4	2,05	-1,57	8,55E-06	0,0004
ARHGAP27P1	Rho GTPase activating protein 27 pseudogene 1	pseudo	3,81	4,46	-1,57	4,14E-05	0,0012
LAT	linker for activation of T cells	protein-coding	0,86	1,51	-1,57	4,37E-07	4,07E-05
TOMM7	translocase of outer mitochondrial membrane 7	protein-coding	7,9	8,55	-1,57	4,39E-07	4,07E-05
RTL1	retrotransposon Gag like 1	protein-coding	1,43	2,08	-1,57	0,0003	0,0051
PMP22	peripheral myelin protein 22	protein-coding	6,26	6,91	-1,57	0,0002	0,0036
SYDE2	synapse defective Rho GTPase homolog 2	protein-coding	2,37	3,02	-1,57	2,28E-06	0,0001
LEO1	LEO1 homolog, Paf1/RNA polymerase II complex component	protein-coding	4,89	5,53	-1,57	0,0005	0,0071
TMEM43	transmembrane protein 43	protein-coding	5,71	6,35	-1,56	6,57E-06	0,0003
TNKS	tankyrase	protein-coding	4,13	4,77	-1,56	6,44E-06	0,0003
ZNRF2P1	zinc and ring finger 2 pseudogene 1	pseudo	1,39	2,03	-1,56	9,46E-05	0,0021
SPART	spartin	protein-coding	5,3	5,94	-1,56	0,0003	0,0053
UAP1	UDP-N-acetylglucosamine pyrophosphorylase 1	protein-coding	6,91	7,55	-1,56	5,13E-05	0,0014
JUND	JunD proto-oncogene, AP-1 transcription factor subunit	protein-coding	5,9	6,54	-1,56	7,71E-08	1,26E-05
PLS3	plastin 3	protein-coding	7,98	8,62	-1,56	0,0002	0,0039
UBR7	ubiquitin protein ligase E3 component n-recognin 7	protein-coding	3,82	4,46	-1,56	0,0002	0,0035
ARL17A	ADP ribosylation factor like GTPase 17A	protein-coding	4,33	4,97	-1,56	0,0003	0,0044
ARHGAP12	Rho GTPase activating protein 12	protein-coding	3,79	4,43	-1,56	8,57E-05	0,0020
ADGRE5	adhesion G protein-coupled receptor E5	protein-coding	5,35	5,99	-1,56	0,0001	0,0026
HNRNPA2B1	heterogeneous nuclear ribonucleoprotein A2/B1	protein-coding	7,92	8,56	-1,56	0,0002	0,0034
FNBP1L	formin binding protein 1 like	protein-coding	4,01	4,65	-1,56	0,0004	0,0065
TDRD3	tudor domain containing 3	protein-coding	4,72	5,36	-1,56	6,36E-07	5,52E-05
LOX	lysyl oxidase	protein-coding	10,1	10,74	-1,56	0,0001	0,0028
ZMPSTE24	zinc metallopeptidase STE24	protein-coding	4,38	5,02	-1,56	6,49E-05	0,0016
HPS5	HPS5 biogenesis of lysosomal organelles complex 2 subunit 2	protein-coding	4,58	5,22	-1,56	6,12E-09	1,87E-06
SUMO1P3	SUMO1 pseudogene 3	pseudo	6,42	7,06	-1,56	1,30E-05	0,0005
RPL29P2	ribosomal protein L29 pseudogene 2	pseudo	3,04	3,68	-1,56	5,87E-05	0,0015
UBE2H	ubiquitin conjugating enzyme E2 H	protein-coding	6,71	7,34	-1,56	0,0002	0,0032
DONSON	DNA replication fork stabilization factor DONSON	protein-coding	2,15	2,79	-1,56	2,79E-05	0,0009
APC	APC regulator of WNT signaling pathway	protein-coding	4,51	5,14	-1,56	4,09E-05	0,0012
TM9SF2	transmembrane 9 superfamily member 2	protein-coding	6,96	7,6	-1,55	0,0002	0,0034
SPATA5	spermatogenesis associated 5	protein-coding	3,22	3,86	-1,55	2,46E-06	0,0001
ARPC1A	actin related protein 2/3 complex subunit 1A	protein-coding	5,8	6,43	-1,55	5,84E-06	0,0003
EBLN3P	endogenous Bornavirus like nucleoprotein 3, pseudogene	pseudo	4,45	5,08	-1,55	1,55E-07	1,95E-05
PTPRA	protein tyrosine phosphatase receptor type A	protein-coding	5,56	6,19	-1,55	9,18E-05	0,0021
PPIP5K2	diphosphoinositol pentakisphosphate kinase 2	protein-coding	3,44	4,07	-1,55	1,07E-05	0,0004
ROCK1P1	Rho associated coiled-coil containing protein kinase 1 pseudogene 1	pseudo	0,5	1,13	-1,55	4,57E-05	0,0013
CPLANE1	ciliogenesis and planar polarity effector 1	protein-coding	4,52	5,15	-1,55	1,70E-06	0,0001
CFAP298	cilia and flagella associated protein 298	protein-coding	3,78	4,41	-1,55	1,03E-05	0,0004
GK5	glycerol kinase 5	protein-coding	2,46	3,09	-1,55	3,54E-07	3,49E-05
TEP1	telomerase associated protein 1	protein-coding	2,82	3,44	-1,55	5,64E-07	5,04E-05
NIT2	nitrilase family member 2	protein-coding	4	4,63	-1,55	6,05E-07	5,35E-05
PRR34-AS1	PRR34 antisense RNA 1	ncRNA	2,41	3,04	-1,55	1,31E-05	0,0005
JADE1	jade family PHD finger 1	protein-coding	5,07	5,69	-1,54	3,97E-05	0,0011
ZFHX3	zinc finger homeobox 3	protein-coding	5,2	5,83	-1,54	3,37E-08	6,95E-06
HELZ	helicase with zinc finger	protein-coding	5,21	5,83	-1,54	4,91E-09	1,65E-06
UBE2B	ubiquitin conjugating enzyme E2 B	protein-coding	5,96	6,58	-1,54	5,95E-05	0,0015
ZFHX2	zinc finger homeobox 2	protein-coding	0,65	1,28	-1,54	3,36E-05	0,0010
MSANTD2	Myb/SANT DNA binding domain containing 2	protein-coding	2,52	3,15	-1,54	1,44E-06	9,89E-05
TRAPPC3	trafficking protein particle complex subunit 3	protein-coding	5,56	6,18	-1,54	1,62E-05	0,0006
SUMO4	small ubiquitin like modifier 4	protein-coding	1,04	1,66	-1,54	0,0002	0,0030
SRP54	signal recognition particle 54	protein-coding	6,45	7,08	-1,54	9,68E-05	0,0021
HSPG2	heparan sulfate proteoglycan 2	protein-coding	7,88	8,5	-1,54	2,00E-06	0,0001
MGC16025	uncharacterized LOC85009	ncRNA	0,97	1,59	-1,54	9,61E-05	0,0021
TAS2R46	taste 2 receptor member 46	protein-coding	0,23	0,85	-1,54	1,18E-07	1,62E-05
FTX	FTX transcript, XIST regulator	ncRNA	5,04	5,66	-1,54	2,04E-06	0,0001
ARL5B	ADP ribosylation factor like GTPase 5B	protein-coding	4,88	5,5	-1,54	1,49E-06	0,0001
ZMYND8	zinc finger MYND-type containing 8	protein-coding	3,08	3,7	-1,54	1,62E-06	0,0001
USP45	ubiquitin specific peptidase 45	protein-coding	2,54	3,16	-1,54	5,79E-05	0,0015
SLC30A7	solute carrier family 30 member 7	protein-coding	4,94	5,56	-1,54	5,58E-10	3,32E-07
TRIP11	thyroid hormone receptor interactor 11	protein-coding	4,49	5,11	-1,54	0,0002	0,0034
METTL21A	methyltransferase 21A, HSPA lysine	protein-coding	3,03	3,65	-1,54	3,25E-05	0,0010
MAP1A	microtubule associated protein 1A	protein-coding	6,12	6,74	-1,54	9,36E-06	0,0004
SEPTIN11	septin 11	protein-coding	9,14	9,76	-1,54	1,99E-06	0,0001
XNDC1N	XRCC1 N-terminal domain containing 1, N-terminal like	protein-coding	1,34	1,96	-1,54	9,12E-07	7,06E-05
ZNF529	zinc finger protein 529	protein-coding	2,88	3,5	-1,54	1,80E-06	0,0001
TRPM4	transient receptor potential cation channel subfamily M member 4	protein-coding	2,58	3,2	-1,54	8,77E-09	2,40E-06
PNPLA7	patatin like phospholipase domain containing 7	protein-coding	1,14	1,76	-1,53	0,0002	0,0029
TMEM87B	transmembrane protein 87B	protein-coding	4,8	5,42	-1,53	8,51E-05	0,0020
FUBP1	far upstream element binding protein 1	protein-coding	5,46	6,07	-1,53	5,14E-06	0,0003
MACF1	microtubule actin crosslinking factor 1	protein-coding	6,27	6,89	-1,53	1,86E-06	0,0001
MXRA8	matrix remodeling associated 8	protein-coding	6,85	7,47	-1,53	0,0006	0,0075
ANKRD20A9P	ankyrin repeat domain 20 family member A9, pseudogene	pseudo	2,75	3,37	-1,53	7,68E-05	0,0018
CDK13	cyclin dependent kinase 13	protein-coding	5,74	6,35	-1,53	9,28E-08	1,46E-05
CBX5	chromobox 5	protein-coding	6,04	6,65	-1,53	2,89E-05	0,0009
FBXO38	F-box protein 38	protein-coding	4,06	4,68	-1,53	0,0001	0,0022
SLC23A2	solute carrier family 23 member 2	protein-coding	3,54	4,16	-1,53	0,0005	0,0070
WNT2B	Wnt family member 2B	protein-coding	1,01	1,63	-1,53	0,0005	0,0069
FAR1	fatty acyl-CoA reductase 1	protein-coding	4,87	5,49	-1,53	1,94E-05	0,0007
SH3RF1	SH3 domain containing ring finger 1	protein-coding	4,4	5,02	-1,53	1,92E-05	0,0006
SYNE1	spectrin repeat containing nuclear envelope protein 1	protein-coding	5,81	6,42	-1,53	5,84E-05	0,0015
CHPF2	chondroitin polymerizing factor 2	protein-coding	5,53	6,14	-1,53	1,08E-05	0,0004
CENPT	centromere protein T	protein-coding	1,03	1,64	-1,53	1,14E-05	0,0004
CERCAM	cerebral endothelial cell adhesion molecule	protein-coding	6,4	7,01	-1,53	0,0005	0,0073
KLRA1P	killer cell lectin like receptor A1, pseudogene	pseudo	1,36	1,97	-1,53	1,86E-05	0,0006
GPATCH4	G-patch domain containing 4	protein-coding	2,84	3,45	-1,53	2,40E-06	0,0001
SRRM1	serine and arginine repetitive matrix 1	protein-coding	6,91	7,52	-1,53	5,93E-06	0,0003
STARD4	StAR related lipid transfer domain containing 4	protein-coding	4,04	4,65	-1,53	0,0004	0,0055
PIK3CA	phosphatidylinositol-4,5-bisphosphate 3-kinase catalytic subunit alpha	protein-coding	4,52	5,14	-1,53	0,0002	0,0034
EXTL1	exostosin like glycosyltransferase 1	protein-coding	0,44	1,05	-1,53	0,0006	0,0080
YTHDC2	YTH domain containing 2	protein-coding	2,31	2,92	-1,53	2,03E-06	0,0001
DDR1	discoidin domain receptor tyrosine kinase 1	protein-coding	4,07	4,68	-1,53	4,14E-05	0,0012
MPC1	mitochondrial pyruvate carrier 1	protein-coding	5,44	6,05	-1,53	8,83E-07	6,91E-05
CEP295	centrosomal protein 295	protein-coding	2,52	3,13	-1,53	2,00E-05	0,0007
SLC2A3	solute carrier family 2 member 3	protein-coding	7,25	7,86	-1,53	1,30E-07	1,73E-05
EVC	EvC ciliary complex subunit 1	protein-coding	5,46	6,07	-1,52	4,34E-05	0,0012
METTL14	methyltransferase 14, N6-adenosine-methyltransferase subunit	protein-coding	2,7	3,31	-1,52	0,0002	0,0037
PHTF2	putative homeodomain transcription factor 2	protein-coding	4,38	4,99	-1,52	0,0008	0,0098
TAS2R13	taste 2 receptor member 13	protein-coding	0,55	1,16	-1,52	9,96E-06	0,0004
DICER1	dicer 1, ribonuclease III	protein-coding	3,44	4,05	-1,52	5,71E-06	0,0003
GLTP	glycolipid transfer protein	protein-coding	4,05	4,66	-1,52	2,70E-05	0,0008
RBM39	RNA binding motif protein 39	protein-coding	7,64	8,24	-1,52	2,79E-07	2,88E-05
POU2F1	POU class 2 homeobox 1	protein-coding	2,54	3,14	-1,52	0,0008	0,0093
UNC13A	unc-13 homolog A	protein-coding	0,01	0,61	-1,52	0,0006	0,0074
XGY2	XG pseudogene, Y-linked 2	pseudo	0,08	0,68	-1,52	1,21E-06	8,80E-05
ZUP1	zinc finger containing ubiquitin peptidase 1	protein-coding	3,4	4	-1,52	2,56E-07	2,75E-05
LTN1	listerin E3 ubiquitin protein ligase 1	protein-coding	4,3	4,91	-1,52	0,0002	0,0040
SLC35D1	solute carrier family 35 member D1	protein-coding	4,12	4,72	-1,52	1,84E-06	0,0001
CRY2	cryptochrome circadian regulator 2	protein-coding	5,73	6,34	-1,52	0,0001	0,0023
VTI1A	vesicle transport through interaction with t-SNAREs 1A	protein-coding	3,92	4,52	-1,52	5,77E-06	0,0003
SLC12A6	solute carrier family 12 member 6	protein-coding	3,64	4,24	-1,52	1,36E-05	0,0005
MST1	macrophage stimulating 1	protein-coding	2,43	3,03	-1,52	8,03E-05	0,0019
FBN1	fibrillin 1	protein-coding	10,81	11,41	-1,52	4,12E-08	7,84E-06
LPAR6	lysophosphatidic acid receptor 6	protein-coding	0,88	1,48	-1,52	1,37E-05	0,0005
TRAPPC4	trafficking protein particle complex subunit 4	protein-coding	5,27	5,87	-1,51	0,0001	0,0028
ARPC3	actin related protein 2/3 complex subunit 3	protein-coding	7,31	7,91	-1,51	0,0003	0,0048
TTC21B	tetratricopeptide repeat domain 21B	protein-coding	3,58	4,17	-1,51	6,66E-05	0,0016
WNK1	WNK lysine deficient protein kinase 1	protein-coding	3	3,6	-1,51	5,33E-06	0,0003
OSBPL3	oxysterol binding protein like 3	protein-coding	5,87	6,46	-1,51	7,87E-05	0,0019
B4GALT4	beta-1,4-galactosyltransferase 4	protein-coding	5,75	6,34	-1,51	1,47E-05	0,0005
CFAP44	cilia and flagella associated protein 44	protein-coding	1,01	1,6	-1,51	0,0002	0,0036
SMAD1	SMAD family member 1	protein-coding	4,21	4,81	-1,51	8,15E-07	6,50E-05
HLX	H2.0 like homeobox	protein-coding	4,39	4,99	-1,51	0,0007	0,0084
TPR	translocated promoter region, nuclear basket protein	protein-coding	6,16	6,76	-1,51	0,0003	0,0043
SREK1	splicing regulatory glutamic acid and lysine rich protein 1	protein-coding	4,94	5,54	-1,51	3,73E-05	0,0011
MAFK	MAF bZIP transcription factor K	protein-coding	3,83	4,43	-1,51	9,27E-07	7,12E-05
DYRK3	dual specificity tyrosine phosphorylation regulated kinase 3	protein-coding	4,11	4,71	-1,51	1,28E-05	0,0005
METTL15	methyltransferase like 15	protein-coding	3,47	4,07	-1,51	2,34E-05	0,0008
P2RX5	purinergic receptor P2X 5	protein-coding	0,44	1,03	-1,51	0,0003	0,0047
C1QTNF3	C1q and TNF related 3	protein-coding	1,64	2,24	-1,51	0,0005	0,0072
CEP43	centrosomal protein 43	protein-coding	3,13	3,72	-1,51	2,42E-05	0,0008
MICU3	mitochondrial calcium uptake family member 3	protein-coding	1,49	2,08	-1,51	5,58E-05	0,0014
LNPK	lunapark, ER junction formation factor	protein-coding	4,97	5,56	-1,51	8,80E-05	0,0020
AK2	adenylate kinase 2	protein-coding	5,95	6,54	-1,51	0,0006	0,0075
AMZ1	archaelysin family metallopeptidase 1	protein-coding	0,33	0,92	-1,51	0,0008	0,0095
PSMA3-AS1	PSMA3 antisense RNA 1	ncRNA	3,43	4,02	-1,5	1,20E-07	1,62E-05
ELF1	E74 like ETS transcription factor 1	protein-coding	5,12	5,71	-1,5	4,25E-06	0,0002
PLEC	plectin	protein-coding	6,28	6,87	-1,5	0,0004	0,0063
ZFP37	ZFP37 zinc finger protein	protein-coding	1,66	2,25	-1,5	7,11E-06	0,0003
BICD1	BICD cargo adaptor 1	protein-coding	0,85	1,44	-1,5	6,03E-06	0,0003
MORF4L2	mortality factor 4 like 2	protein-coding	4,64	5,23	-1,5	0,0001	0,0023
DDAH1	dimethylarginine dimethylaminohydrolase 1	protein-coding	7,48	8,06	-1,5	0,0003	0,0049
KPNA5	karyopherin subunit alpha 5	protein-coding	3,19	3,78	-1,5	4,62E-06	0,0002
CHORDC1P4	CHORDC1 pseudogene 4	pseudo	0,27	0,86	-1,5	7,97E-07	6,46E-05
SUGCT	succinyl-CoA:glutarate-CoA transferase	protein-coding	1,86	2,45	-1,5	1,17E-05	0,0004
SLC37A3	solute carrier family 37 member 3	protein-coding	4,81	5,4	-1,5	8,25E-06	0,0003
NCL	nucleolin	protein-coding	7,34	7,92	-1,5	0,0006	0,0075
STK17A	serine/threonine kinase 17a	protein-coding	5,15	5,74	-1,5	1,39E-05	0,0005
EMP2	epithelial membrane protein 2	protein-coding	6,5	5,9	1,52	0,0001	0,0024
RAMP2	receptor activity modifying protein 2	protein-coding	1,73	1,11	1,54	0,0003	0,0047
BMP2	bone morphogenetic protein 2	protein-coding	0,91	0,28	1,54	6,03E-05	0,0015
PLIN2	perilipin 2	protein-coding	8,04	7,41	1,55	6,31E-05	0,0016
TNIP3	TNFAIP3 interacting protein 3	protein-coding	2,15	1,52	1,55	0,0002	0,0039
ARHGAP24	Rho GTPase activating protein 24	protein-coding	4,77	4,13	1,56	0,0006	0,0077
COL27A1	collagen type XXVII alpha 1 chain	protein-coding	4,57	3,93	1,56	0,0002	0,0033
HS6ST1	heparan sulfate 6-O-sulfotransferase 1	protein-coding	4,93	4,29	1,56	0,0005	0,0067
H2AC21	H2A clustered histone 21	protein-coding	4,49	3,84	1,57	2,87E-05	0,0009
ADAMDEC1	ADAM like decysin 1	protein-coding	0,42	-0,23	1,57	2,75E-07	2,86E-05
DMC1	DNA meiotic recombinase 1	protein-coding	4,16	3,51	1,57	0,0001	0,0027
MMD	monocyte to macrophage differentiation associated	protein-coding	3,07	2,41	1,58	2,41E-05	0,0008
LIMD2	LIM domain containing 2	protein-coding	3,48	2,82	1,58	0,0006	0,0080
KCNG1	potassium voltage-gated channel modifier subfamily G member 1	protein-coding	3,75	3,08	1,58	0,0003	0,0051
CCDC7	coiled-coil domain containing 7	protein-coding	4,76	4,09	1,59	1,77E-06	0,0001
BARD1	BRCA1 associated RING domain 1	protein-coding	3,97	3,29	1,6	6,05E-06	0,0003
ADGRG1	adhesion G protein-coupled receptor G1	protein-coding	2,05	1,37	1,6	0,0007	0,0088
ARAP3	ArfGAP with RhoGAP domain, ankyrin repeat and PH domain 3	protein-coding	4,3	3,62	1,6	7,69E-07	6,30E-05
NDRG2	NDRG family member 2	protein-coding	2,01	1,32	1,61	0,0006	0,0081
LINC01426	long intergenic non-protein coding RNA 1426	ncRNA	2,73	2,04	1,61	7,74E-05	0,0018
SV2A	synaptic vesicle glycoprotein 2A	protein-coding	4,18	3,49	1,62	0,0001	0,0023
ARG2	arginase 2	protein-coding	2,74	2,05	1,62	0,0001	0,0028
RUNX2	RUNX family transcription factor 2	protein-coding	4,15	3,46	1,62	0,0003	0,0043
NBPF15	NBPF member 15	protein-coding	0,59	-0,11	1,62	3,92E-06	0,0002
NUAK2	NUAK family kinase 2	protein-coding	3,86	3,16	1,63	7,26E-06	0,0003
RPS6KA1	ribosomal protein S6 kinase A1	protein-coding	1,39	0,69	1,63	2,89E-08	6,20E-06
AFF2	AF4/FMR2 family member 2	protein-coding	3,21	2,5	1,63	0,0007	0,0089
ADM	adrenomedullin	protein-coding	10,84	10,13	1,63	0,0007	0,0090
POU2F2-AS1	POU2F2 antisense RNA 1	ncRNA	1,36	0,65	1,63	8,61E-05	0,0020
ACSS3	acyl-CoA synthetase short chain family member 3	protein-coding	2,72	2,01	1,64	0,0005	0,0068
ZNF22	zinc finger protein 22	protein-coding	3,1	2,38	1,65	3,43E-09	1,29E-06
H1-4	H1.4 linker histone, cluster member	protein-coding	5,73	5,01	1,65	0,0002	0,0036
GTPBP2	GTP binding protein 2	protein-coding	6,71	5,98	1,66	1,52E-06	0,0001
SLC43A3	solute carrier family 43 member 3	protein-coding	5,54	4,8	1,66	0,0008	0,0097
TNFRSF1B	TNF receptor superfamily member 1B	protein-coding	3,92	3,18	1,66	0,0003	0,0048
MAGED4B	MAGE family member D4B	protein-coding	4,22	3,48	1,67	5,79E-09	1,82E-06
BASP1	brain abundant membrane attached signal protein 1	protein-coding	4,77	4,03	1,67	1,91E-06	0,0001
OR2A20P	olfactory receptor family 2 subfamily A member 20 pseudogene	pseudo	3,55	2,8	1,68	0,0002	0,0030
PLTP	phospholipid transfer protein	protein-coding	4,58	3,82	1,69	0,0001	0,0023
SLC6A15	solute carrier family 6 member 15	protein-coding	1,66	0,89	1,7	6,36E-05	0,0016
HS3ST3B1	heparan sulfate-glucosamine 3-sulfotransferase 3B1	protein-coding	4,16	3,39	1,7	5,64E-05	0,0015
TMEM132A	transmembrane protein 132A	protein-coding	5,27	4,5	1,7	6,92E-05	0,0017
ADORA1	adenosine A1 receptor	protein-coding	1,49	0,71	1,72	1,52E-06	0,0001
PCDHAC2	protocadherin alpha subfamily C, 2	protein-coding	1,32	0,54	1,72	0,0003	0,0051
SRPX	sushi repeat containing protein X-linked	protein-coding	6,94	6,15	1,73	0,0005	0,0071
CSF3	colony stimulating factor 3	protein-coding	0,7	-0,09	1,73	0,0002	0,0032
PMAIP1	phorbol-12-myristate-13-acetate-induced protein 1	protein-coding	2,67	1,88	1,73	4,16E-05	0,0012
CD40	CD40 molecule	protein-coding	3,5	2,71	1,73	7,85E-05	0,0019
H2BC10	H2B clustered histone 10	protein-coding	2,27	1,48	1,74	0,0006	0,0082
CH25H	cholesterol 25-hydroxylase	protein-coding	6,33	5,52	1,75	0,0006	0,0082
UBALD2	UBA like domain containing 2	protein-coding	6,53	5,72	1,76	1,16E-11	2,00E-08
H2BC4	H2B clustered histone 4	protein-coding	5,2	4,38	1,76	9,55E-05	0,0021
S100A2	S100 calcium binding protein A2	protein-coding	3,23	2,4	1,77	0,0006	0,0076
NQO1	NAD(P)H quinone dehydrogenase 1	protein-coding	7,7	6,87	1,78	6,74E-06	0,0003
MT1E	metallothionein 1E	protein-coding	6,48	5,64	1,78	2,48E-05	0,0008
VDR	vitamin D receptor	protein-coding	6,68	5,84	1,78	1,06E-07	1,56E-05
IL1RN	interleukin 1 receptor antagonist	protein-coding	0,9	0,06	1,79	7,03E-06	0,0003
H3C11	H3 clustered histone 11	protein-coding	6,45	5,6	1,8	6,89E-05	0,0017
PCDHGA11	protocadherin gamma subfamily A, 11	protein-coding	4,27	3,42	1,8	3,20E-06	0,0002
AKR1B1	aldo-keto reductase family 1 member B	protein-coding	6,58	5,72	1,83	2,88E-08	6,20E-06
IL4I1	interleukin 4 induced 1	protein-coding	0,95	0,08	1,83	1,04E-07	1,55E-05
PF4V1	platelet factor 4 variant 1	protein-coding	0,87	-0,01	1,83	0,0004	0,0054
TUBA4A	tubulin alpha 4a	protein-coding	2,67	1,79	1,84	9,46E-05	0,0021
CCL5	C-C motif chemokine ligand 5	protein-coding	0,69	-0,19	1,85	0,0001	0,0023
NETO2	neuropilin and tolloid like 2	protein-coding	3,87	2,98	1,85	0,0003	0,0044
TRIB3	tribbles pseudokinase 3	protein-coding	8,11	7,22	1,85	2,75E-05	0,0009
TRIM16	tripartite motif containing 16	protein-coding	5,45	4,54	1,87	2,79E-08	6,12E-06
EPB41L3	erythrocyte membrane protein band 4.1 like 3	protein-coding	6,83	5,91	1,89	6,02E-05	0,0015
GMFG	glia maturation factor gamma	protein-coding	1,14	0,21	1,91	0,0004	0,0054
CYP1B1	cytochrome P450 family 1 subfamily B member 1	protein-coding	8,04	7,11	1,91	0,0003	0,0051
CYYR1	cysteine and tyrosine rich 1	protein-coding	1,06	0,11	1,92	5,54E-06	0,0003
CCL8	C-C motif chemokine ligand 8	protein-coding	0,76	-0,2	1,94	9,50E-10	4,94E-07
PNKD	PNKD metallo-beta-lactamase domain containing	protein-coding	3,06	2,1	1,95	7,67E-05	0,0018
H2AC17	H2A clustered histone 17	protein-coding	4,72	3,75	1,96	6,20E-05	0,0016
TRIM16L	tripartite motif containing 16 like	pseudo	3,64	2,67	1,96	5,45E-05	0,0014
CTSS	cathepsin S	protein-coding	1,88	0,89	1,98	9,78E-05	0,0021
SLC22A4	solute carrier family 22 member 4	protein-coding	3,23	2,23	2	1,53E-07	1,94E-05
CD82	CD82 molecule	protein-coding	3,59	2,59	2,01	2,58E-05	0,0008
CCL7	C-C motif chemokine ligand 7	protein-coding	1,64	0,63	2,01	6,50E-06	0,0003
C1QTNF1	C1q and TNF related 1	protein-coding	3,75	2,74	2,02	4,10E-06	0,0002
KCNE3	potassium voltage-gated channel subfamily E regulatory subunit 3	protein-coding	1,97	0,95	2,03	4,18E-07	3,98E-05
LAMC3	laminin subunit gamma 3	protein-coding	1,09	0,05	2,06	2,99E-09	1,25E-06
H2AC13	H2A clustered histone 13	protein-coding	4,06	3,02	2,06	0,0007	0,0085
TNC	tenascin C	protein-coding	10,81	9,75	2,09	2,64E-06	0,0002
QPRT	quinolinate phosphoribosyltransferase	protein-coding	2,58	1,49	2,13	7,83E-05	0,0019
CRYBG1	crystallin beta-gamma domain containing 1	protein-coding	4,06	2,96	2,14	0,0005	0,0073
WASHC1	WASH complex subunit 1	protein-coding	2,48	1,38	2,16	4,52E-06	0,0002
ARSI	arylsulfatase family member I	protein-coding	3,11	2	2,16	1,91E-07	2,21E-05
SALL1	spalt like transcription factor 1	protein-coding	3,9	2,78	2,17	8,11E-06	0,0003
POU2F2	POU class 2 homeobox 2	protein-coding	2,73	1,59	2,21	5,54E-06	0,0003
TNFRSF21	TNF receptor superfamily member 21	protein-coding	5,85	4,69	2,24	0,0001	0,0024
DGAT2	diacylglycerol O-acyltransferase 2	protein-coding	2,9	1,72	2,27	5,59E-06	0,0003
WWC1	WW and C2 domain containing 1	protein-coding	3,47	2,21	2,39	0,0001	0,0026
PRDM1	PR/SET domain 1	protein-coding	4,74	3,45	2,44	1,11E-05	0,0004
CCL2	C-C motif chemokine ligand 2	protein-coding	7,34	6,01	2,52	4,35E-05	0,0012
PHACTR1	phosphatase and actin regulator 1	protein-coding	2,34	1	2,53	4,21E-06	0,0002
CD163	CD163 molecule	protein-coding	1,93	0,59	2,53	4,01E-08	7,73E-06
LINC00623	long intergenic non-protein coding RNA 623	ncRNA	2,28	0,94	2,54	6,12E-07	5,36E-05
TSPAN18	tetraspanin 18	protein-coding	5,28	3,91	2,59	4,20E-05	0,0012
KCNJ15	potassium inwardly rectifying channel subfamily J member 15	protein-coding	3,39	2	2,61	3,08E-08	6,42E-06
IL32	interleukin 32	protein-coding	5,76	4,37	2,61	0,0003	0,0051
TNFAIP6	TNF alpha induced protein 6	protein-coding	5,75	4,37	2,62	0,0003	0,0051
GNAO1	G protein subunit alpha o1	protein-coding	1,55	0,13	2,68	3,76E-11	4,89E-08
GBP5	guanylate binding protein 5	protein-coding	2,48	1,01	2,76	2,87E-06	0,0002
RBP1	retinol binding protein 1	protein-coding	2,13	0,66	2,77	3,97E-06	0,0002
INHBE	inhibin subunit beta E	protein-coding	3,12	1,65	2,77	1,31E-05	0,0005
SLC1A3	solute carrier family 1 member 3	protein-coding	4,63	3,16	2,78	0,0002	0,0041
APOE	apolipoprotein E	protein-coding	3,47	1,96	2,85	0,0002	0,0037
MDFI	MyoD family inhibitor	protein-coding	2,52	1	2,88	0,0007	0,0085
MAP7	microtubule associated protein 7	protein-coding	4,02	2,41	3,04	1,39E-07	1,81E-05
TMEM176B	transmembrane protein 176B	protein-coding	1,97	0,1	3,67	7,23E-07	6,02E-05
RIPOR3	RIPOR family member 3	protein-coding	2,94	1,06	3,68	8,54E-05	0,0020
CYP7B1	cytochrome P450 family 7 subfamily B member 1	protein-coding	3,5	1,58	3,79	1,54E-05	0,0005
IFI27	interferon alpha inducible protein 27	protein-coding	3,94	1,93	4,05	4,91E-05	0,0013
CXCL8	C-X-C motif chemokine ligand 8	protein-coding	5,01	2,83	4,51	6,92E-05	0,0017
CXCL3	C-X-C motif chemokine ligand 3	protein-coding	3,34	1,02	5	5,23E-07	4,73E-05
CXCL1	C-X-C motif chemokine ligand 1	protein-coding	5,24	2,79	5,48	1,16E-05	0,0004
MMP3	matrix metallopeptidase 3	protein-coding	5,02	2,43	6,03	2,17E-05	0,0007
CXCL5	C-X-C motif chemokine ligand 5	protein-coding	2,75	0,08	6,37	2,72E-07	2,85E-05
CES1	carboxylesterase 1	protein-coding	3,82	0,98	7,15	6,67E-10	3,86E-07
MMP1	matrix metallopeptidase 1	protein-coding	5,18	1,92	9,59	2,59E-11	3,84E-08
CXCL6	C-X-C motif chemokine ligand 6	protein-coding	5,97	2,06	15,04	1,49E-07	1,90E-05

## Sheet: HSD vs controls
1174 DEGs identified in HSD vs control
Gene Symbol	GENENAME	GENETYPE	HSD Avg (log2)	control Avg (log2)	Fold Change	uncorrected p-value ≤0.01	FDR-adjusted p-value ≤0.01
PI16	peptidase inhibitor 16	protein-coding	3,21	6,08	-7,28	0,0009	0,0074
FOSB	FosB proto-oncogene, AP-1 transcription factor subunit	protein-coding	1,16	3,94	-6,84	2,46E-08	2,59E-06
FOS	Fos proto-oncogene, AP-1 transcription factor subunit	protein-coding	3,26	5,66	-5,27	2,66E-07	1,44E-05
DEPTOR	DEP domain containing MTOR interacting protein	protein-coding	3,7	6	-4,94	0,0001	0,0015
IGFBP7	insulin like growth factor binding protein 7	protein-coding	6	8,25	-4,74	2,09E-06	6,85E-05
NEAT1	nuclear paraspeckle assembly transcript 1	ncRNA	7,12	9,35	-4,7	2,90E-15	3,02E-11
USP53	ubiquitin specific peptidase 53	protein-coding	5,24	7,46	-4,68	2,20E-07	1,28E-05
KRT19	keratin 19	protein-coding	2,99	5,17	-4,52	8,01E-06	0,0002
NPR3	natriuretic peptide receptor 3	protein-coding	4,93	6,98	-4,15	8,66E-07	3,45E-05
FRAS1	Fraser extracellular matrix complex subunit 1	protein-coding	3,26	5,29	-4,1	2,84E-07	1,50E-05
GALNT12	polypeptide N-acetylgalactosaminyltransferase 12	protein-coding	1,66	3,69	-4,09	2,07E-06	6,82E-05
RDH10	retinol dehydrogenase 10	protein-coding	5,08	7,1	-4,07	4,58E-06	0,0001
OXTR	oxytocin receptor	protein-coding	4,01	5,97	-3,92	0,0001	0,0016
ABCA9	ATP binding cassette subfamily A member 9	protein-coding	2,52	4,49	-3,91	4,69E-06	0,0001
CACNB4	calcium voltage-gated channel auxiliary subunit beta 4	protein-coding	0,58	2,46	-3,69	9,61E-07	3,75E-05
TMEM14EP	transmembrane protein 14E, pseudogene	pseudo	1,71	3,57	-3,65	5,03E-12	5,51E-09
MALL	mal, T cell differentiation protein like	protein-coding	2,3	4,15	-3,63	0,0001	0,0019
TNXB	tenascin XB	protein-coding	3,46	5,31	-3,61	0,0003	0,0029
PTGIS	prostaglandin I2 synthase	protein-coding	6,7	8,52	-3,55	4,73E-05	0,0008
NR4A1	nuclear receptor subfamily 4 group A member 1	protein-coding	2,46	4,28	-3,51	1,88E-05	0,0004
CDH6	cadherin 6	protein-coding	1,97	3,76	-3,47	0,0003	0,0033
TNXA	tenascin XA (pseudogene)	pseudo	1,97	3,74	-3,41	2,44E-05	0,0005
AKAP12	A-kinase anchoring protein 12	protein-coding	4,18	5,94	-3,39	1,38E-07	9,10E-06
POSTN	periostin	protein-coding	7,87	9,63	-3,38	0,0008	0,0073
ARHGAP20	Rho GTPase activating protein 20	protein-coding	1,65	3,39	-3,35	8,36E-07	3,39E-05
NR4A2	nuclear receptor subfamily 4 group A member 2	protein-coding	1,29	3,03	-3,33	1,83E-05	0,0004
SULF1	sulfatase 1	protein-coding	7,71	9,44	-3,32	4,75E-06	0,0001
WNT2	Wnt family member 2	protein-coding	2,91	4,64	-3,3	7,69E-06	0,0002
SHROOM3	shroom family member 3	protein-coding	4,01	5,73	-3,27	1,60E-12	2,57E-09
ROR1	receptor tyrosine kinase like orphan receptor 1	protein-coding	3,77	5,47	-3,24	4,70E-07	2,20E-05
GPRC5A	G protein-coupled receptor class C group 5 member A	protein-coding	2,85	4,52	-3,18	5,56E-05	0,0009
SIK1	salt inducible kinase 1	protein-coding	2,57	4,21	-3,11	7,89E-07	3,26E-05
GRAMD2B	GRAM domain containing 2B	protein-coding	5,15	6,79	-3,11	2,22E-07	1,28E-05
GOLGA8B	golgin A8 family member B	protein-coding	4,04	5,62	-3	3,76E-13	7,83E-10
COMP	cartilage oligomeric matrix protein	protein-coding	6,06	7,64	-2,99	0,0011	0,0091
ID4	inhibitor of DNA binding 4, HLH protein	protein-coding	1,93	3,49	-2,95	5,10E-05	0,0008
UTRN	utrophin	protein-coding	5,14	6,7	-2,94	2,65E-12	3,45E-09
MBP	myelin basic protein	protein-coding	0,86	2,41	-2,91	2,37E-06	7,64E-05
PLCE1-AS1	PLCE1 antisense RNA 1	ncRNA	0,43	1,97	-2,91	1,21E-06	4,45E-05
ATP10D	ATPase phospholipid transporting 10D (putative)	protein-coding	3,66	5,19	-2,89	2,55E-12	3,45E-09
GULP1	GULP PTB domain containing engulfment adaptor 1	protein-coding	2,72	4,25	-2,89	2,87E-06	8,92E-05
DOCK11	dedicator of cytokinesis 11	protein-coding	4,25	5,75	-2,84	1,67E-11	1,24E-08
ERCC6	ERCC excision repair 6, chromatin remodeling factor	protein-coding	3,52	5,03	-2,84	9,13E-10	2,53E-07
GCNT1	glucosaminyl (N-acetyl) transferase 1	protein-coding	4,1	5,6	-2,83	6,68E-11	3,57E-08
SGMS2	sphingomyelin synthase 2	protein-coding	4,28	5,78	-2,83	1,49E-10	6,09E-08
PRUNE2	prune homolog 2 with BCH domain	protein-coding	1,68	3,18	-2,83	3,70E-05	0,0007
PTPRQ	protein tyrosine phosphatase receptor type Q	protein-coding	1,1	2,6	-2,82	2,44E-08	2,59E-06
CDKN2A	cyclin dependent kinase inhibitor 2A	protein-coding	0,75	2,23	-2,81	0,0001	0,0016
FAM126A	family with sequence similarity 126 member A	protein-coding	6,35	7,84	-2,79	1,88E-12	2,80E-09
GOLGB1	golgin B1	protein-coding	4,74	6,22	-2,79	2,64E-14	1,37E-10
FMN1	formin 1	protein-coding	3,42	4,88	-2,76	5,93E-08	4,73E-06
FZD4	frizzled class receptor 4	protein-coding	2,45	3,9	-2,73	4,46E-07	2,11E-05
BHLHE40	basic helix-loop-helix family member e40	protein-coding	6,64	8,09	-2,72	1,10E-10	4,92E-08
LRRC37A4P	leucine rich repeat containing 37 member A4, pseudogene	pseudo	1,18	2,63	-2,72	3,63E-06	0,0001
LIMCH1	LIM and calponin homology domains 1	protein-coding	3,29	4,73	-2,72	0,0004	0,0041
BLID	BH3-like motif containing, cell death inducer	protein-coding	2,26	3,7	-2,72	2,16E-11	1,50E-08
FAM133CP	family with sequence similarity 133, member A pseudogene	pseudo	1,29	2,73	-2,71	1,76E-08	2,01E-06
SLC38A4	solute carrier family 38 member 4	protein-coding	1,64	3,07	-2,71	0,0010	0,0084
MYH2	myosin heavy chain 2	protein-coding	0,88	2,31	-2,69	0,0002	0,0025
SEMA3C	semaphorin 3C	protein-coding	6,82	8,24	-2,68	2,34E-07	1,31E-05
TRPC4	transient receptor potential cation channel subfamily C member 4	protein-coding	2,32	3,73	-2,67	5,17E-05	0,0009
BMP6	bone morphogenetic protein 6	protein-coding	2,43	3,84	-2,66	7,66E-06	0,0002
KCTD16	potassium channel tetramerization domain containing 16	protein-coding	1	2,41	-2,65	0,0005	0,0047
NEK7	NIMA related kinase 7	protein-coding	7,56	8,97	-2,64	1,64E-14	1,14E-10
THSD4	thrombospondin type 1 domain containing 4	protein-coding	3,07	4,47	-2,64	2,49E-05	0,0005
CSF2RB	colony stimulating factor 2 receptor subunit beta	protein-coding	0,16	1,56	-2,64	0,0003	0,0036
HMGN1	high mobility group nucleosome binding domain 1	protein-coding	5,01	6,4	-2,61	2,03E-07	1,20E-05
CEMIP	cell migration inducing hyaluronidase 1	protein-coding	8,4	9,78	-2,61	3,33E-06	9,99E-05
ATP8B1	ATPase phospholipid transporting 8B1	protein-coding	4,5	5,88	-2,59	8,44E-09	1,10E-06
COL14A1	collagen type XIV alpha 1 chain	protein-coding	2,06	3,42	-2,56	3,90E-05	0,0007
DNAJB4	DnaJ heat shock protein family (Hsp40) member B4	protein-coding	4,8	6,16	-2,56	8,59E-06	0,0002
MID1	midline 1	protein-coding	2,39	3,73	-2,53	1,00E-05	0,0002
PDE5A	phosphodiesterase 5A	protein-coding	2,89	4,23	-2,53	9,65E-05	0,0014
ANO4	anoctamin 4	protein-coding	0,38	1,72	-2,53	7,02E-07	2,98E-05
VCAN	versican	protein-coding	6,12	7,46	-2,53	1,71E-07	1,06E-05
UACA	uveal autoantigen with coiled-coil domains and ankyrin repeats	protein-coding	5,45	6,79	-2,53	1,92E-09	4,29E-07
VGLL3	vestigial like family member 3	protein-coding	7,83	9,14	-2,48	1,60E-08	1,88E-06
FMN2	formin 2	protein-coding	4,06	5,36	-2,46	1,78E-09	4,07E-07
PKD2	polycystin 2, transient receptor potential cation channel	protein-coding	6,03	7,33	-2,46	1,04E-10	4,81E-08
PGBD3	piggyBac transposable element derived 3	protein-coding	2,69	3,99	-2,46	1,99E-09	4,35E-07
TEK	TEK receptor tyrosine kinase	protein-coding	0,91	2,21	-2,46	0,0002	0,0025
HES1	hes family bHLH transcription factor 1	protein-coding	0,24	1,54	-2,45	8,02E-09	1,08E-06
NKTR	natural killer cell triggering receptor	protein-coding	3,21	4,5	-2,45	6,91E-14	2,40E-10
NFYB	nuclear transcription factor Y subunit beta	protein-coding	4,45	5,74	-2,44	5,72E-09	8,56E-07
CPA4	carboxypeptidase A4	protein-coding	4,12	5,4	-2,43	0,0003	0,0035
DUSP1	dual specificity phosphatase 1	protein-coding	7,71	8,98	-2,41	8,94E-06	0,0002
USP32P2	ubiquitin specific peptidase 32 pseudogene 2	pseudo	1,3	2,56	-2,4	0,0006	0,0057
CREBRF	CREB3 regulatory factor	protein-coding	4,81	6,07	-2,4	9,03E-07	3,55E-05
LINC00312	long intergenic non-protein coding RNA 312	ncRNA	2,65	3,9	-2,38	2,20E-05	0,0004
F2R	coagulation factor II thrombin receptor	protein-coding	2,28	3,52	-2,36	0,0005	0,0047
LINC00641	long intergenic non-protein coding RNA 641	ncRNA	3,05	4,29	-2,36	2,81E-15	3,02E-11
KLF4	Kruppel like factor 4	protein-coding	4,36	5,6	-2,36	2,24E-07	1,29E-05
ADGRG6	adhesion G protein-coupled receptor G6	protein-coding	1,54	2,78	-2,36	0,0002	0,0028
PLK2	polo like kinase 2	protein-coding	4,21	5,45	-2,36	3,12E-08	3,05E-06
DST	dystonin	protein-coding	6,56	7,78	-2,33	9,44E-09	1,21E-06
LENG8	leukocyte receptor cluster member 8	protein-coding	6,16	7,38	-2,33	8,76E-14	2,60E-10
ABCA5	ATP binding cassette subfamily A member 5	protein-coding	3,23	4,44	-2,32	1,91E-06	6,45E-05
SNORA70G	small nucleolar RNA, H/ACA box 70G	snoRNA	3,69	4,9	-2,32	6,99E-07	2,98E-05
NEXN	nexilin F-actin binding protein	protein-coding	4,96	6,17	-2,3	4,23E-10	1,40E-07
HAPLN3	hyaluronan and proteoglycan link protein 3	protein-coding	3,04	4,25	-2,3	9,78E-05	0,0014
TGFBR1	transforming growth factor beta receptor 1	protein-coding	6,24	7,44	-2,3	2,34E-08	2,50E-06
EBF1	EBF transcription factor 1	protein-coding	4,14	5,33	-2,29	1,64E-07	1,03E-05
ANGPTL1	angiopoietin like 1	protein-coding	1,55	2,73	-2,27	0,0007	0,0065
OLR1	oxidized low density lipoprotein receptor 1	protein-coding	0,61	1,79	-2,27	0,0001	0,0019
AKAP6	A-kinase anchoring protein 6	protein-coding	2,4	3,58	-2,27	0,0004	0,0045
MBNL2	muscleblind like splicing regulator 2	protein-coding	7,09	8,26	-2,26	2,16E-08	2,37E-06
ARHGAP5	Rho GTPase activating protein 5	protein-coding	5,48	6,65	-2,25	2,56E-13	5,92E-10
OSR1	odd-skipped related transcription factor 1	protein-coding	4,19	5,36	-2,25	2,79E-06	8,73E-05
FAM66D	family with sequence similarity 66 member D	ncRNA	0,9	2,07	-2,25	2,73E-09	5,46E-07
PLAAT3	phospholipase A and acyltransferase 3	protein-coding	3,73	4,89	-2,24	0,0002	0,0024
BST1	bone marrow stromal cell antigen 1	protein-coding	2,82	3,98	-2,24	0,0001	0,0014
ITPRIP	inositol 1,4,5-trisphosphate receptor interacting protein	protein-coding	1,38	2,54	-2,23	5,70E-08	4,58E-06
BCAT1	branched chain amino acid transaminase 1	protein-coding	5,83	6,98	-2,23	2,31E-06	7,50E-05
CLIC4	chloride intracellular channel 4	protein-coding	9,38	10,54	-2,23	1,55E-09	3,61E-07
SLC35E2B	solute carrier family 35 member E2B	protein-coding	4,44	5,6	-2,22	0,0001	0,0016
LIMS2	LIM zinc finger domain containing 2	protein-coding	5,13	6,28	-2,22	2,94E-05	0,0006
FAT1	FAT atypical cadherin 1	protein-coding	6,99	8,14	-2,21	6,92E-08	5,32E-06
LMO7	LIM domain 7	protein-coding	7,66	8,79	-2,2	4,92E-08	4,23E-06
ITGBL1	integrin subunit beta like 1	protein-coding	7,74	8,87	-2,19	2,51E-07	1,39E-05
N4BP2L2	NEDD4 binding protein 2 like 2	protein-coding	3,37	4,5	-2,19	3,74E-08	3,42E-06
RECQL	RecQ like helicase	protein-coding	3,4	4,52	-2,18	2,34E-08	2,50E-06
LAMA3	laminin subunit alpha 3	protein-coding	0,87	1,99	-2,18	0,0002	0,0028
THAP9-AS1	THAP9 antisense RNA 1	ncRNA	5,38	6,5	-2,18	2,85E-09	5,64E-07
MGARP	mitochondria localized glutamic acid rich protein	protein-coding	2,34	3,46	-2,18	0,0004	0,0041
RHOJ	ras homolog family member J	protein-coding	1,1	2,21	-2,17	1,87E-06	6,35E-05
UBE2Q2P1	ubiquitin conjugating enzyme E2 Q2 pseudogene 1	pseudo	2,98	4,09	-2,17	2,65E-11	1,67E-08
SPTAN1	spectrin alpha, non-erythrocytic 1	protein-coding	7,3	8,41	-2,16	5,10E-14	2,12E-10
FER1L4	fer-1 like family member 4 (pseudogene)	pseudo	2,13	3,24	-2,16	0,0001	0,0016
ABCA6	ATP binding cassette subfamily A member 6	protein-coding	3,08	4,19	-2,16	0,0002	0,0026
FLJ42393	uncharacterized LOC401105	ncRNA	1,27	2,38	-2,16	3,06E-09	5,84E-07
RPL13AP6	ribosomal protein L13a pseudogene 6	pseudo	1,02	2,12	-2,15	1,08E-08	1,34E-06
C11orf96	chromosome 11 open reading frame 96	protein-coding	1,41	2,51	-2,15	0,0003	0,0036
VPS13A	vacuolar protein sorting 13 homolog A	protein-coding	3,52	4,62	-2,14	8,45E-09	1,10E-06
SNORA70B	small nucleolar RNA, H/ACA box 70B	snoRNA	1,01	2,1	-2,14	1,81E-09	4,10E-07
CSRNP1	cysteine and serine rich nuclear protein 1	protein-coding	2,92	4,01	-2,13	3,24E-07	1,66E-05
BTG2	BTG anti-proliferation factor 2	protein-coding	2,46	3,56	-2,13	2,34E-06	7,54E-05
ZMAT3	zinc finger matrin-type 3	protein-coding	5,32	6,41	-2,13	8,98E-05	0,0013
RECK	reversion inducing cysteine rich protein with kazal motifs	protein-coding	7,54	8,62	-2,13	5,11E-05	0,0008
LINC02969	long intergenic non-protein coding RNA 2969	ncRNA	1,99	3,07	-2,12	5,01E-09	7,83E-07
FABP3	fatty acid binding protein 3	protein-coding	0,73	1,8	-2,11	0,0006	0,0060
LRRC2	leucine rich repeat containing 2	protein-coding	3,02	4,09	-2,1	0,0002	0,0028
WNT4	Wnt family member 4	protein-coding	0,07	1,14	-2,1	8,66E-07	3,45E-05
SLC7A5P2	solute carrier family 7 member 5 pseudogene 2	pseudo	2,11	3,18	-2,1	5,70E-07	2,57E-05
LOC392196	ubiquitin specific peptidase 17 like family member 2 pseudogene	pseudo	1,23	2,3	-2,1	5,08E-05	0,0008
ABCA10	ATP binding cassette subfamily A member 10	protein-coding	0,87	1,93	-2,09	6,89E-06	0,0002
PABPC1L	poly(A) binding protein cytoplasmic 1 like	protein-coding	2,29	3,35	-2,09	1,64E-10	6,51E-08
CUL4B	cullin 4B	protein-coding	7,17	8,23	-2,09	9,98E-08	6,98E-06
LRRFIP1	LRR binding FLII interacting protein 1	protein-coding	5,7	6,77	-2,09	6,17E-08	4,84E-06
MGAT5	alpha-1,6-mannosylglycoprotein 6-beta-N-acetylglucosaminyltransferase	protein-coding	3,74	4,8	-2,09	1,16E-07	7,97E-06
FZD6	frizzled class receptor 6	protein-coding	4,76	5,82	-2,08	8,31E-07	3,38E-05
GALNT7	polypeptide N-acetylgalactosaminyltransferase 7	protein-coding	3,41	4,46	-2,08	3,92E-09	6,58E-07
SAMD12	sterile alpha motif domain containing 12	protein-coding	0,83	1,89	-2,08	0,0001	0,0017
FNIP2	folliculin interacting protein 2	protein-coding	3,79	4,84	-2,07	5,45E-08	4,48E-06
RALGAPA1	Ral GTPase activating protein catalytic subunit alpha 1	protein-coding	2,76	3,81	-2,07	4,72E-12	5,46E-09
USP17L2	ubiquitin specific peptidase 17 like family member 2	protein-coding	1,14	2,19	-2,07	7,02E-07	2,98E-05
AHNAK2	AHNAK nucleoprotein 2	protein-coding	5,57	6,62	-2,07	0,0010	0,0086
CBLB	Cbl proto-oncogene B	protein-coding	3,7	4,75	-2,07	3,74E-06	0,0001
MFGE8	milk fat globule EGF and factor V/VIII domain containing	protein-coding	8,35	9,4	-2,07	0,0011	0,0090
TAS2R19	taste 2 receptor member 19	protein-coding	1,35	2,4	-2,07	5,58E-08	4,50E-06
NCKAP5	NCK associated protein 5	protein-coding	2,1	3,15	-2,07	0,0009	0,0075
GNPTAB	N-acetylglucosamine-1-phosphate transferase subunits alpha and beta	protein-coding	4,03	5,08	-2,07	5,18E-08	4,39E-06
RPGRIP1L	RPGRIP1 like	protein-coding	2,74	3,79	-2,07	1,11E-10	4,92E-08
HEATR5A	HEAT repeat containing 5A	protein-coding	4,55	5,59	-2,06	3,43E-10	1,19E-07
PEAK1	pseudopodium enriched atypical kinase 1	protein-coding	6,56	7,61	-2,06	1,55E-11	1,19E-08
LOC90246	uncharacterized LOC90246	ncRNA	1,05	2,09	-2,06	5,57E-06	0,0002
RGS2	regulator of G protein signaling 2	protein-coding	0,98	2,02	-2,06	4,64E-07	2,18E-05
PTPN12	protein tyrosine phosphatase non-receptor type 12	protein-coding	6,24	7,28	-2,06	5,66E-09	8,53E-07
ARID4B	AT-rich interaction domain 4B	protein-coding	4,07	5,11	-2,06	7,37E-12	6,67E-09
CMAHP	cytidine monophospho-N-acetylneuraminic acid hydroxylase, pseudogene	pseudo	2,04	3,08	-2,05	0,0002	0,0022
TAS2R20	taste 2 receptor member 20	protein-coding	0,64	1,68	-2,05	5,47E-08	4,48E-06
ZFC3H1	zinc finger C3H1-type containing	protein-coding	3,8	4,84	-2,05	1,14E-11	9,15E-09
KMT2A	lysine methyltransferase 2A	protein-coding	5,15	6,19	-2,05	7,02E-11	3,65E-08
AHSA2P	activator of HSP90 ATPase homolog 2, pseudogene	pseudo	3,7	4,74	-2,05	7,41E-09	1,04E-06
CCDC80	coiled-coil domain containing 80	protein-coding	5,75	6,79	-2,05	3,69E-08	3,41E-06
NDFIP2	Nedd4 family interacting protein 2	protein-coding	4,5	5,53	-2,05	3,25E-08	3,14E-06
SETD7	SET domain containing 7, histone lysine methyltransferase	protein-coding	6,27	7,3	-2,05	1,27E-10	5,35E-08
TDRD3	tudor domain containing 3	protein-coding	4,33	5,36	-2,04	2,47E-11	1,61E-08
ZEB1	zinc finger E-box binding homeobox 1	protein-coding	5,6	6,63	-2,04	1,00E-06	3,85E-05
ATXN2	ataxin 2	protein-coding	5,67	6,7	-2,04	3,25E-09	6,10E-07
FZD8	frizzled class receptor 8	protein-coding	1,99	3,02	-2,04	8,72E-05	0,0013
ANKRD29	ankyrin repeat domain 29	protein-coding	1,08	2,11	-2,03	9,27E-06	0,0002
OPTN	optineurin	protein-coding	5,87	6,9	-2,03	6,47E-09	9,42E-07
KLF10	Kruppel like factor 10	protein-coding	4,95	5,98	-2,03	2,02E-06	6,70E-05
PLEKHG3	pleckstrin homology and RhoGEF domain containing G3	protein-coding	1,96	2,98	-2,03	7,10E-07	3,00E-05
ARHGAP12	Rho GTPase activating protein 12	protein-coding	3,41	4,43	-2,03	2,68E-08	2,69E-06
FERMT2	FERM domain containing kindlin 2	protein-coding	6,89	7,91	-2,02	1,04E-06	3,94E-05
STK38	serine/threonine kinase 38	protein-coding	4,86	5,88	-2,02	3,30E-12	4,04E-09
PFN1P2	profilin 1 pseudogene 2	pseudo	2,84	3,86	-2,02	1,98E-09	4,35E-07
NLRP10	NLR family pyrin domain containing 10	protein-coding	1,43	2,45	-2,02	0,0010	0,0082
RASSF8-AS1	RASSF8 antisense RNA 1	ncRNA	2,66	3,67	-2,02	7,51E-09	1,05E-06
TPR	translocated promoter region, nuclear basket protein	protein-coding	5,74	6,76	-2,02	2,08E-09	4,46E-07
TMTC3	transmembrane O-mannosyltransferase targeting cadherins 3	protein-coding	5,38	6,39	-2,02	7,31E-06	0,0002
DDX60L	DExD/H-box 60 like	protein-coding	3,48	4,49	-2,02	3,67E-08	3,41E-06
COLGALT2	collagen beta(1-O)galactosyltransferase 2	protein-coding	1,29	2,29	-2,01	0,0008	0,0071
ANKH	ANKH inorganic pyrophosphate transport regulator	protein-coding	4,27	5,27	-2	2,86E-05	0,0005
MTHFD1L	methylenetetrahydrofolate dehydrogenase (NADP+ dependent) 1 like	protein-coding	5,69	6,69	-2	8,02E-13	1,52E-09
SAMD9	sterile alpha motif domain containing 9	protein-coding	1,97	2,96	-2	6,53E-05	0,0010
MPHOSPH8	M-phase phosphoprotein 8	protein-coding	4,3	5,3	-2	3,56E-10	1,19E-07
PCGF5	polycomb group ring finger 5	protein-coding	3,78	4,78	-1,99	3,43E-09	6,13E-07
LPCAT2	lysophosphatidylcholine acyltransferase 2	protein-coding	3,73	4,73	-1,99	6,79E-05	0,0010
SNORA70F	small nucleolar RNA, H/ACA box 70F	snoRNA	0,47	1,46	-1,99	3,21E-06	9,73E-05
KIF5B	kinesin family member 5B	protein-coding	7,39	8,39	-1,99	1,58E-05	0,0003
GLS	glutaminase	protein-coding	8,2	9,19	-1,99	3,51E-09	6,14E-07
HSPA4L	heat shock protein family A (Hsp70) member 4 like	protein-coding	1,76	2,75	-1,98	0,0006	0,0054
CRYGS	crystallin gamma S	protein-coding	0,83	1,82	-1,98	4,98E-10	1,57E-07
TMTC2	transmembrane O-mannosyltransferase targeting cadherins 2	protein-coding	1,65	2,64	-1,98	0,0011	0,0089
MPRIP	myosin phosphatase Rho interacting protein	protein-coding	6,6	7,59	-1,98	3,91E-07	1,91E-05
PARD3B	par-3 family cell polarity regulator beta	protein-coding	4,41	5,39	-1,98	3,22E-05	0,0006
PTAR1	protein prenyltransferase alpha subunit repeat containing 1	protein-coding	3,6	4,59	-1,98	5,17E-09	8,02E-07
KLF2	Kruppel like factor 2	protein-coding	3,38	4,36	-1,98	0,0004	0,0040
SRSF5	serine and arginine rich splicing factor 5	protein-coding	7,65	8,63	-1,97	6,95E-12	6,58E-09
NALCN	sodium leak channel, non-selective	protein-coding	1,49	2,47	-1,96	0,0001	0,0015
TAS2R14	taste 2 receptor member 14	protein-coding	1,96	2,93	-1,96	8,77E-10	2,47E-07
TMEM117	transmembrane protein 117	protein-coding	3,1	4,07	-1,96	3,61E-07	1,81E-05
PITX2	paired like homeodomain 2	protein-coding	1,46	2,43	-1,96	0,0011	0,0090
RNF150	ring finger protein 150	protein-coding	4,2	5,17	-1,95	0,0005	0,0047
PRR14L	proline rich 14 like	protein-coding	4,03	4,99	-1,95	8,27E-11	4,10E-08
CPLANE1	ciliogenesis and planar polarity effector 1	protein-coding	4,18	5,15	-1,95	2,89E-10	1,04E-07
PTK2B	protein tyrosine kinase 2 beta	protein-coding	3,04	4,01	-1,95	0,0002	0,0021
PHTF2	putative homeodomain transcription factor 2	protein-coding	4,03	4,99	-1,95	1,01E-05	0,0002
TMEM11	transmembrane protein 11	protein-coding	3,25	4,21	-1,95	0,0002	0,0021
SKIL	SKI like proto-oncogene	protein-coding	5,91	6,87	-1,95	2,28E-07	1,29E-05
ANKIB1	ankyrin repeat and IBR domain containing 1	protein-coding	5,76	6,73	-1,95	3,27E-08	3,14E-06
MAGI2	membrane associated guanylate kinase, WW and PDZ domain containing 2	protein-coding	1,88	2,85	-1,95	2,22E-05	0,0004
BLZF1	basic leucine zipper nuclear factor 1	protein-coding	4,55	5,51	-1,95	1,37E-06	4,96E-05
LANCL1	LanC like 1	protein-coding	4,68	5,64	-1,95	4,06E-07	1,95E-05
OLFM1	olfactomedin 1	protein-coding	2,6	3,56	-1,95	0,0010	0,0084
SLC7A6	solute carrier family 7 member 6	protein-coding	3,74	4,7	-1,94	6,68E-12	6,58E-09
ZNF84	zinc finger protein 84	protein-coding	3,37	4,33	-1,94	8,66E-09	1,12E-06
SSB	small RNA binding exonuclease protection factor La	protein-coding	5,23	6,19	-1,94	7,04E-08	5,39E-06
FOXC2	forkhead box C2	protein-coding	1,16	2,11	-1,94	2,03E-05	0,0004
PLK3	polo like kinase 3	protein-coding	3,3	4,26	-1,94	1,32E-07	8,76E-06
SREK1	splicing regulatory glutamic acid and lysine rich protein 1	protein-coding	4,58	5,54	-1,94	4,77E-09	7,58E-07
CLIP4	CAP-Gly domain containing linker protein family member 4	protein-coding	5,29	6,24	-1,94	7,85E-06	0,0002
CCNL2	cyclin L2	protein-coding	4,55	5,5	-1,94	1,07E-09	2,82E-07
CYCSP52	CYCS pseudogene 52	pseudo	0,75	1,7	-1,94	3,80E-08	3,42E-06
LINC00672	long intergenic non-protein coding RNA 672	ncRNA	0,87	1,82	-1,93	7,05E-10	2,07E-07
VEPH1	ventricular zone expressed PH domain containing 1	protein-coding	3,06	4,01	-1,93	0,0007	0,0064
ATRX	ATRX chromatin remodeler	protein-coding	3,86	4,81	-1,93	2,86E-07	1,51E-05
RABGEF1	RAB guanine nucleotide exchange factor 1	protein-coding	4,65	5,59	-1,93	1,99E-13	5,17E-10
TTC37	tetratricopeptide repeat domain 37	protein-coding	4,7	5,65	-1,93	5,25E-07	2,41E-05
JAK1	Janus kinase 1	protein-coding	6,83	7,78	-1,93	3,13E-06	9,57E-05
RIOK2	RIO kinase 2	protein-coding	3,9	4,85	-1,93	9,25E-10	2,53E-07
ADAM9	ADAM metallopeptidase domain 9	protein-coding	6,88	7,83	-1,93	8,23E-08	6,05E-06
HSPH1	heat shock protein family H (Hsp110) member 1	protein-coding	3,5	4,45	-1,93	3,75E-08	3,42E-06
SEMA4A	semaphorin 4A	protein-coding	1,53	2,47	-1,92	4,06E-07	1,95E-05
CHMP1B	charged multivesicular body protein 1B	protein-coding	6,31	7,25	-1,92	1,84E-08	2,06E-06
FRY	FRY microtubule binding protein	protein-coding	3,66	4,6	-1,92	0,0010	0,0085
TRIP11	thyroid hormone receptor interactor 11	protein-coding	4,17	5,11	-1,92	1,17E-08	1,43E-06
FOXO1	forkhead box O1	protein-coding	2,99	3,93	-1,92	7,60E-07	3,16E-05
SETX	senataxin	protein-coding	5,28	6,22	-1,92	8,24E-10	2,35E-07
XG	Xg glycoprotein (Xg blood group)	protein-coding	2,67	3,61	-1,92	5,45E-05	0,0009
CCNL1	cyclin L1	protein-coding	4,38	5,32	-1,92	7,56E-05	0,0011
PPP1CC	protein phosphatase 1 catalytic subunit gamma	protein-coding	6,39	7,33	-1,91	4,89E-07	2,27E-05
SH3BP5	SH3 domain binding protein 5	protein-coding	5,4	6,33	-1,91	2,34E-05	0,0005
SLC36A1	solute carrier family 36 member 1	protein-coding	3,3	4,24	-1,91	6,62E-07	2,84E-05
DYNLT4	dynein light chain Tctex-type 4	protein-coding	1,79	2,73	-1,91	1,05E-05	0,0002
JMJD1C	jumonji domain containing 1C	protein-coding	3,89	4,83	-1,91	1,78E-08	2,03E-06
MED23	mediator complex subunit 23	protein-coding	2,71	3,64	-1,91	4,63E-10	1,48E-07
KMT2C	lysine methyltransferase 2C	protein-coding	3,79	4,72	-1,9	8,61E-12	7,47E-09
ARRDC3	arrestin domain containing 3	protein-coding	4,72	5,64	-1,9	0,0003	0,0034
FRS2	fibroblast growth factor receptor substrate 2	protein-coding	4,62	5,55	-1,9	1,66E-10	6,51E-08
LINC01133	long intergenic non-protein coding RNA 1133	ncRNA	4,51	5,43	-1,9	0,0002	0,0027
SRGAP2B	SLIT-ROBO Rho GTPase activating protein 2B	protein-coding	1,18	2,11	-1,9	1,84E-07	1,12E-05
ZNF638	zinc finger protein 638	protein-coding	4,8	5,72	-1,89	2,16E-08	2,37E-06
CEP295	centrosomal protein 295	protein-coding	2,2	3,13	-1,89	2,65E-08	2,69E-06
CTR9	CTR9 homolog, Paf1/RNA polymerase II complex component	protein-coding	5,12	6,04	-1,89	1,94E-07	1,16E-05
PRSS12	serine protease 12	protein-coding	5,4	6,32	-1,89	0,0003	0,0035
EID3	EP300 interacting inhibitor of differentiation 3	protein-coding	2,75	3,67	-1,89	5,54E-06	0,0002
PER1	period circadian regulator 1	protein-coding	5,11	6,03	-1,89	4,93E-05	0,0008
MYO1E	myosin IE	protein-coding	6,48	7,39	-1,88	0,0005	0,0046
IFIT2	interferon induced protein with tetratricopeptide repeats 2	protein-coding	3,02	3,93	-1,88	0,0010	0,0085
ORMDL1	ORMDL sphingolipid biosynthesis regulator 1	protein-coding	4,08	4,99	-1,88	1,03E-08	1,29E-06
CALD1	caldesmon 1	protein-coding	9,05	9,96	-1,88	2,05E-05	0,0004
LDHAL6B	lactate dehydrogenase A like 6B	protein-coding	1,93	2,84	-1,88	9,00E-05	0,0013
METTL15	methyltransferase like 15	protein-coding	3,16	4,07	-1,88	2,99E-09	5,80E-07
FNBP1L	formin binding protein 1 like	protein-coding	3,74	4,65	-1,88	2,65E-06	8,42E-05
LTN1	listerin E3 ubiquitin protein ligase 1	protein-coding	4	4,91	-1,88	9,55E-08	6,78E-06
NEK10	NIMA related kinase 10	protein-coding	1,92	2,83	-1,88	3,04E-05	0,0006
WNK1	WNK lysine deficient protein kinase 1	protein-coding	2,69	3,6	-1,88	3,01E-09	5,80E-07
KLF9	Kruppel like factor 9	protein-coding	4,89	5,8	-1,87	0,0003	0,0030
VPS13C	vacuolar protein sorting 13 homolog C	protein-coding	5,03	5,93	-1,87	1,04E-07	7,21E-06
SLC7A5P1	solute carrier family 7 member 5 pseudogene 1	pseudo	2,83	3,73	-1,87	2,01E-07	1,19E-05
REV3L	REV3 like, DNA directed polymerase zeta catalytic subunit	protein-coding	4,97	5,88	-1,87	0,0009	0,0078
EP300	E1A binding protein p300	protein-coding	3,89	4,8	-1,87	4,30E-11	2,42E-08
SPATA5	spermatogenesis associated 5	protein-coding	2,95	3,86	-1,87	3,43E-08	3,23E-06
DYNC2H1	dynein cytoplasmic 2 heavy chain 1	protein-coding	4,21	5,11	-1,87	2,33E-06	7,52E-05
MDM2	MDM2 proto-oncogene	protein-coding	5,55	6,45	-1,87	3,58E-06	0,0001
RAD17	RAD17 checkpoint clamp loader component	protein-coding	3,52	4,42	-1,87	8,39E-09	1,10E-06
ZNF10	zinc finger protein 10	protein-coding	0,85	1,75	-1,87	3,30E-09	6,13E-07
GGCT	gamma-glutamylcyclotransferase	protein-coding	3,36	4,26	-1,87	9,82E-09	1,24E-06
TAOK1	TAO kinase 1	protein-coding	6,45	7,35	-1,87	1,43E-09	3,39E-07
NFIA	nuclear factor I A	protein-coding	3,5	4,4	-1,87	0,0003	0,0030
FTX	FTX transcript, XIST regulator	ncRNA	4,76	5,66	-1,86	1,26E-09	3,15E-07
DPP8	dipeptidyl peptidase 8	protein-coding	3,74	4,64	-1,86	2,81E-08	2,77E-06
SYDE2	synapse defective Rho GTPase homolog 2	protein-coding	2,12	3,02	-1,86	7,91E-09	1,07E-06
ADGRE5	adhesion G protein-coupled receptor E5	protein-coding	5,09	5,99	-1,86	3,39E-05	0,0006
EPRS1	glutamyl-prolyl-tRNA synthetase 1	protein-coding	6,98	7,88	-1,86	6,80E-09	9,75E-07
ANKRD33B	ankyrin repeat domain 33B	protein-coding	2,38	3,27	-1,86	0,0005	0,0049
NNMT	nicotinamide N-methyltransferase	protein-coding	8,26	9,15	-1,86	2,77E-06	8,67E-05
PLEKHA3	pleckstrin homology domain containing A3	protein-coding	4,09	4,98	-1,86	1,65E-05	0,0004
BTBD1	BTB domain containing 1	protein-coding	6,73	7,62	-1,86	6,66E-10	2,01E-07
CDC73	cell division cycle 73	protein-coding	4,61	5,5	-1,86	2,71E-07	1,45E-05
DICER1	dicer 1, ribonuclease III	protein-coding	3,15	4,05	-1,86	4,94E-09	7,79E-07
CERT1	ceramide transporter 1	protein-coding	4,34	5,23	-1,86	1,60E-07	1,02E-05
RASSF2	Ras association domain family member 2	protein-coding	2,41	3,3	-1,86	0,0009	0,0075
BTBD3	BTB domain containing 3	protein-coding	3,55	4,44	-1,86	4,19E-06	0,0001
DGKI	diacylglycerol kinase iota	protein-coding	1,89	2,78	-1,86	3,48E-05	0,0006
RUFY3	RUN and FYVE domain containing 3	protein-coding	3,76	4,65	-1,85	6,39E-08	4,98E-06
MEIS2	Meis homeobox 2	protein-coding	6,02	6,91	-1,85	9,27E-05	0,0013
C1orf198	chromosome 1 open reading frame 198	protein-coding	7,01	7,9	-1,85	3,44E-05	0,0006
STK38L	serine/threonine kinase 38 like	protein-coding	3,79	4,68	-1,85	0,0004	0,0040
LINC00597	long intergenic non-protein coding RNA 597	ncRNA	0,81	1,7	-1,85	1,03E-06	3,93E-05
SRP54	signal recognition particle 54	protein-coding	6,19	7,08	-1,85	1,69E-08	1,97E-06
TTC21B	tetratricopeptide repeat domain 21B	protein-coding	3,29	4,17	-1,85	1,46E-07	9,46E-06
C1GALT1	core 1 synthase, glycoprotein-N-acetylgalactosamine 3-beta-galactosyltransferase 1	protein-coding	5,19	6,07	-1,85	2,24E-07	1,29E-05
POLK	DNA polymerase kappa	protein-coding	3,33	4,22	-1,85	1,79E-08	2,03E-06
DCUN1D1	defective in cullin neddylation 1 domain containing 1	protein-coding	4,51	5,39	-1,85	1,62E-08	1,90E-06
GDPD5	glycerophosphodiester phosphodiesterase domain containing 5	protein-coding	2,49	3,37	-1,84	8,26E-07	3,37E-05
TENT2	terminal nucleotidyltransferase 2	protein-coding	4,44	5,32	-1,84	2,47E-09	5,09E-07
OSBPL8	oxysterol binding protein like 8	protein-coding	6,91	7,79	-1,84	0,0002	0,0028
DCAF13P3	DDB1 and CUL4 associated factor 13 pseudogene 3	pseudo	0,77	1,66	-1,84	7,23E-08	5,45E-06
SCARNA17	small Cajal body-specific RNA 17	ncRNA	5,47	6,35	-1,84	8,77E-08	6,38E-06
MRPS30	mitochondrial ribosomal protein S30	protein-coding	4,47	5,35	-1,84	1,00E-06	3,85E-05
APC	APC regulator of WNT signaling pathway	protein-coding	4,26	5,14	-1,84	3,31E-08	3,16E-06
BIRC6	baculoviral IAP repeat containing 6	protein-coding	4,94	5,82	-1,84	3,38E-11	2,01E-08
SF3B1	splicing factor 3b subunit 1	protein-coding	7,06	7,94	-1,84	6,40E-12	6,58E-09
LOC145474	uncharacterized LOC145474	ncRNA	0,52	1,4	-1,84	4,80E-07	2,24E-05
ADAM10	ADAM metallopeptidase domain 10	protein-coding	5,95	6,83	-1,84	8,26E-07	3,37E-05
FBXO3	F-box protein 3	protein-coding	4,59	5,47	-1,84	1,07E-09	2,82E-07
MAP3K7CL	MAP3K7 C-terminal like	protein-coding	4,32	5,2	-1,84	0,0005	0,0047
AHI1	Abelson helper integration site 1	protein-coding	3,68	4,55	-1,83	3,65E-09	6,28E-07
ZNF708	zinc finger protein 708	protein-coding	2,78	3,65	-1,83	3,97E-11	2,29E-08
AFAP1	actin filament associated protein 1	protein-coding	5,66	6,53	-1,83	1,29E-10	5,35E-08
MUC1	mucin 1, cell surface associated	protein-coding	3,37	4,24	-1,83	1,20E-05	0,0003
PILRB	paired immunoglobin like type 2 receptor beta	protein-coding	2,83	3,7	-1,83	1,95E-08	2,17E-06
PIGA	phosphatidylinositol glycan anchor biosynthesis class A	protein-coding	2,18	3,06	-1,83	3,61E-09	6,27E-07
SMG1P3	SMG1 pseudogene 3	pseudo	5,42	6,29	-1,83	4,80E-08	4,16E-06
MAP2K3	mitogen-activated protein kinase kinase 3	protein-coding	5,03	5,9	-1,83	4,46E-06	0,0001
RPL21P44	ribosomal protein L21 pseudogene 44	pseudo	0,32	1,18	-1,83	1,79E-10	6,88E-08
LRRK2	leucine rich repeat kinase 2	protein-coding	2,37	3,24	-1,83	0,0004	0,0044
PRPF18	pre-mRNA processing factor 18	protein-coding	3,33	4,2	-1,82	2,05E-11	1,47E-08
UBR1	ubiquitin protein ligase E3 component n-recognin 1	protein-coding	3,48	4,35	-1,82	2,23E-08	2,43E-06
EFHC1	EF-hand domain containing 1	protein-coding	2,8	3,67	-1,82	2,78E-08	2,76E-06
STAMBPL1	STAM binding protein like 1	protein-coding	3,05	3,92	-1,82	6,64E-05	0,0010
PCYOX1	prenylcysteine oxidase 1	protein-coding	5,9	6,77	-1,82	1,14E-06	4,25E-05
SYT12	synaptotagmin 12	protein-coding	0,04	0,9	-1,82	9,11E-08	6,56E-06
SNAI1	snail family transcriptional repressor 1	protein-coding	4,36	5,23	-1,82	4,16E-05	0,0007
ZFR	zinc finger RNA binding protein	protein-coding	5,67	6,53	-1,82	7,74E-08	5,73E-06
LEO1	LEO1 homolog, Paf1/RNA polymerase II complex component	protein-coding	4,67	5,53	-1,82	7,07E-06	0,0002
PLEKHH2	pleckstrin homology, MyTH4 and FERM domain containing H2	protein-coding	2,06	2,92	-1,82	6,43E-06	0,0002
DOCK7	dedicator of cytokinesis 7	protein-coding	5,37	6,23	-1,82	4,36E-10	1,42E-07
ZNF480	zinc finger protein 480	protein-coding	2,54	3,4	-1,81	1,43E-07	9,32E-06
MALAT1	metastasis associated lung adenocarcinoma transcript 1	ncRNA	10,83	11,69	-1,81	3,40E-06	0,0001
SORT1	sortilin 1	protein-coding	4,65	5,51	-1,81	0,0001	0,0018
SLC38A1	solute carrier family 38 member 1	protein-coding	4,15	5	-1,81	8,06E-06	0,0002
SMS	spermine synthase	protein-coding	4,54	5,39	-1,81	9,13E-05	0,0013
ZRANB2	zinc finger RANBP2-type containing 2	protein-coding	2,01	2,86	-1,81	6,64E-09	9,60E-07
INTU	inturned planar cell polarity protein	protein-coding	2,65	3,51	-1,81	1,71E-05	0,0004
EBLN3P	endogenous Bornavirus like nucleoprotein 3, pseudogene	pseudo	4,23	5,08	-1,81	3,39E-10	1,19E-07
PDCD4	programmed cell death 4	protein-coding	6,2	7,05	-1,81	1,35E-08	1,60E-06
IGIP	IgA inducing protein	protein-coding	3,96	4,81	-1,81	5,85E-08	4,68E-06
ZNF300	zinc finger protein 300	protein-coding	1,86	2,71	-1,81	4,39E-09	7,20E-07
SCARNA5	small Cajal body-specific RNA 5	ncRNA	4,4	5,25	-1,81	0,0003	0,0034
FHL2	four and a half LIM domains 2	protein-coding	7,93	8,78	-1,81	1,88E-07	1,14E-05
USP45	ubiquitin specific peptidase 45	protein-coding	2,31	3,16	-1,8	6,01E-08	4,75E-06
LINC01347	long intergenic non-protein coding RNA 1347	ncRNA	2,44	3,29	-1,8	1,82E-07	1,11E-05
CD109	CD109 molecule	protein-coding	6,09	6,94	-1,8	8,24E-05	0,0012
GIGYF2	GRB10 interacting GYF protein 2	protein-coding	5,33	6,18	-1,8	5,52E-08	4,48E-06
ZNF160	zinc finger protein 160	protein-coding	4,08	4,93	-1,8	2,86E-11	1,75E-08
HELZ	helicase with zinc finger	protein-coding	4,98	5,83	-1,8	1,40E-12	2,43E-09
ZBTB41	zinc finger and BTB domain containing 41	protein-coding	4,14	4,99	-1,8	7,36E-08	5,53E-06
KLRA1P	killer cell lectin like receptor A1, pseudogene	pseudo	1,12	1,97	-1,8	2,63E-07	1,43E-05
CEP162	centrosomal protein 162	protein-coding	2,43	3,28	-1,8	4,59E-05	0,0008
ARL5B	ADP ribosylation factor like GTPase 5B	protein-coding	4,65	5,5	-1,8	6,89E-10	2,05E-07
HSF4	heat shock transcription factor 4	protein-coding	1,8	2,64	-1,8	1,32E-05	0,0003
PDLIM5	PDZ and LIM domain 5	protein-coding	6,14	6,98	-1,79	0,0003	0,0032
TNKS	tankyrase	protein-coding	3,93	4,77	-1,79	4,38E-08	3,86E-06
GANC	glucosidase alpha, neutral C	protein-coding	3,16	4	-1,79	6,33E-09	9,27E-07
LRRC41	leucine rich repeat containing 41	protein-coding	4,33	5,17	-1,79	2,33E-08	2,50E-06
PLS3	plastin 3	protein-coding	7,79	8,62	-1,79	9,84E-06	0,0002
PHLDB2	pleckstrin homology like domain family B member 2	protein-coding	3,78	4,62	-1,78	1,34E-05	0,0003
TIPARP	TCDD inducible poly(ADP-ribose) polymerase	protein-coding	4,75	5,59	-1,78	0,0009	0,0078
IFT80	intraflagellar transport 80	protein-coding	4,38	5,22	-1,78	2,70E-07	1,45E-05
XPO4	exportin 4	protein-coding	3,02	3,85	-1,78	1,16E-10	5,02E-08
LOC100190986	uncharacterized LOC100190986	ncRNA	4,12	4,95	-1,78	0,0005	0,0048
TAS2R30	taste 2 receptor member 30	protein-coding	0,51	1,34	-1,78	2,34E-07	1,31E-05
MAP3K1	mitogen-activated protein kinase kinase kinase 1	protein-coding	3,16	3,99	-1,78	0,0002	0,0025
VTN	vitronectin	protein-coding	0,57	1,4	-1,78	0,0001	0,0015
ZNF529	zinc finger protein 529	protein-coding	2,67	3,5	-1,78	1,23E-08	1,48E-06
ZC3H7A	zinc finger CCCH-type containing 7A	protein-coding	4,35	5,18	-1,77	3,80E-09	6,43E-07
HSPG2	heparan sulfate proteoglycan 2	protein-coding	7,67	8,5	-1,77	5,57E-08	4,50E-06
DPF3	double PHD fingers 3	protein-coding	1,87	2,69	-1,77	0,0002	0,0028
DDX5	DEAD-box helicase 5	protein-coding	8,11	8,94	-1,77	1,10E-11	9,14E-09
MLH3	mutL homolog 3	protein-coding	2,84	3,66	-1,77	7,71E-07	3,20E-05
CCNH	cyclin H	protein-coding	3,76	4,58	-1,77	1,64E-06	5,82E-05
MAP4K5	mitogen-activated protein kinase kinase kinase kinase 5	protein-coding	4,54	5,36	-1,77	6,12E-08	4,83E-06
SEPTIN11	septin 11	protein-coding	8,93	9,76	-1,77	2,27E-07	1,29E-05
CLIP3	CAP-Gly domain containing linker protein 3	protein-coding	6,87	7,69	-1,77	2,53E-06	8,07E-05
ZFP37	ZFP37 zinc finger protein	protein-coding	1,43	2,25	-1,77	2,71E-07	1,45E-05
SASS6	SAS-6 centriolar assembly protein	protein-coding	1,48	2,3	-1,77	7,96E-05	0,0012
ARHGAP27P1	Rho GTPase activating protein 27 pseudogene 1	pseudo	3,63	4,46	-1,77	5,01E-06	0,0001
MED13L	mediator complex subunit 13L	protein-coding	6,44	7,26	-1,77	4,67E-07	2,20E-05
HECTD2	HECT domain E3 ubiquitin protein ligase 2	protein-coding	2,67	3,49	-1,77	2,45E-06	7,84E-05
TAS2R13	taste 2 receptor member 13	protein-coding	0,33	1,16	-1,77	4,56E-07	2,15E-05
PLXNA2	plexin A2	protein-coding	3,45	4,27	-1,77	0,0010	0,0085
TBC1D3	TBC1 domain family member 3	protein-coding	2,87	3,69	-1,77	3,43E-09	6,13E-07
NPAT	nuclear protein, coactivator of histone transcription	protein-coding	3,68	4,51	-1,77	9,15E-08	6,57E-06
TP53INP1	tumor protein p53 inducible nuclear protein 1	protein-coding	2,56	3,38	-1,77	0,0001	0,0018
CBX1	chromobox 1	protein-coding	2,13	2,95	-1,77	5,86E-06	0,0002
ZFHX4	zinc finger homeobox 4	protein-coding	3,29	4,11	-1,76	0,0011	0,0091
EXPH5	exophilin 5	protein-coding	0,32	1,14	-1,76	0,0009	0,0078
CHN2	chimerin 2	protein-coding	0,12	0,94	-1,76	0,0007	0,0060
HLTF	helicase like transcription factor	protein-coding	3,98	4,8	-1,76	7,88E-06	0,0002
KIAA1671	KIAA1671	protein-coding	0,89	1,71	-1,76	9,65E-05	0,0014
APLP2	amyloid beta precursor like protein 2	protein-coding	6,03	6,85	-1,76	0,0007	0,0061
MYEF2	myelin expression factor 2	protein-coding	0,78	1,6	-1,76	4,20E-05	0,0007
PATJ	PATJ crumbs cell polarity complex component	protein-coding	2,58	3,4	-1,76	0,0002	0,0027
SGCB	sarcoglycan beta	protein-coding	6,95	7,76	-1,76	5,33E-05	0,0009
INSIG2	insulin induced gene 2	protein-coding	3,95	4,77	-1,76	1,19E-06	4,40E-05
ETF1	eukaryotic translation termination factor 1	protein-coding	5,28	6,09	-1,76	1,74E-07	1,08E-05
PER3	period circadian regulator 3	protein-coding	3,81	4,62	-1,76	9,97E-05	0,0014
SUMO4	small ubiquitin like modifier 4	protein-coding	0,85	1,66	-1,76	9,25E-06	0,0002
CAPZA2	capping actin protein of muscle Z-line subunit alpha 2	protein-coding	6,38	7,19	-1,75	4,26E-05	0,0007
PLEKHA5	pleckstrin homology domain containing A5	protein-coding	3,06	3,87	-1,75	0,0002	0,0026
SNORA58	small nucleolar RNA, H/ACA box 58	snoRNA	1,3	2,11	-1,75	1,56E-07	9,98E-06
CAPN3	calpain 3	protein-coding	1,85	2,65	-1,75	2,58E-07	1,41E-05
FAR1	fatty acyl-CoA reductase 1	protein-coding	4,68	5,49	-1,75	3,78E-08	3,42E-06
ZFP36	ZFP36 ring finger protein	protein-coding	6,1	6,9	-1,75	0,0002	0,0024
RGPD6	RANBP2 like and GRIP domain containing 6	protein-coding	3,37	4,18	-1,75	1,00E-09	2,71E-07
AP3B1	adaptor related protein complex 3 subunit beta 1	protein-coding	4,9	5,71	-1,75	5,41E-11	2,96E-08
METAP2	methionyl aminopeptidase 2	protein-coding	5,71	6,52	-1,75	2,66E-07	1,44E-05
PIK3R2	phosphoinositide-3-kinase regulatory subunit 2	protein-coding	5,99	6,8	-1,75	1,76E-06	6,04E-05
ATP13A3	ATPase 13A3	protein-coding	6,89	7,69	-1,74	2,36E-05	0,0005
ATP6V0A1	ATPase H+ transporting V0 subunit a1	protein-coding	4,51	5,31	-1,74	8,35E-06	0,0002
PRPF39	pre-mRNA processing factor 39	protein-coding	3,95	4,75	-1,74	5,61E-09	8,53E-07
SCAND2P	SCAN domain containing 2 pseudogene	pseudo	1,25	2,05	-1,74	3,92E-07	1,91E-05
ZNRF2P1	zinc and ring finger 2 pseudogene 1	pseudo	1,23	2,03	-1,74	2,15E-06	7,01E-05
MAMLD1	mastermind like domain containing 1	protein-coding	3,8	4,6	-1,74	0,0001	0,0017
FBXO38	F-box protein 38	protein-coding	3,88	4,68	-1,74	5,50E-07	2,50E-05
PPIP5K2	diphosphoinositol pentakisphosphate kinase 2	protein-coding	3,27	4,07	-1,74	4,33E-08	3,84E-06
NEDD1	NEDD1 gamma-tubulin ring complex targeting factor	protein-coding	3,35	4,15	-1,74	1,00E-06	3,85E-05
LNPK	lunapark, ER junction formation factor	protein-coding	4,76	5,56	-1,74	3,22E-06	9,73E-05
WDR47	WD repeat domain 47	protein-coding	3,84	4,64	-1,74	4,44E-08	3,90E-06
WIPF1	WAS/WASL interacting protein family member 1	protein-coding	6,31	7,1	-1,74	0,0002	0,0022
VPS41	VPS41 subunit of HOPS complex	protein-coding	5,02	5,81	-1,74	8,40E-09	1,10E-06
UBR7	ubiquitin protein ligase E3 component n-recognin 7	protein-coding	3,67	4,46	-1,74	2,13E-05	0,0004
TMEM43	transmembrane protein 43	protein-coding	5,56	6,35	-1,73	1,86E-06	6,32E-05
WWC3	WWC family member 3	protein-coding	4,56	5,35	-1,73	3,02E-06	9,26E-05
SUGCT	succinyl-CoA:glutarate-CoA transferase	protein-coding	1,65	2,45	-1,73	7,18E-08	5,45E-06
DMTF1	cyclin D binding myb like transcription factor 1	protein-coding	4,13	4,93	-1,73	2,60E-06	8,27E-05
ECHDC2	enoyl-CoA hydratase domain containing 2	protein-coding	3,14	3,93	-1,73	2,75E-06	8,64E-05
ST7	suppression of tumorigenicity 7	protein-coding	4,18	4,97	-1,73	1,92E-07	1,16E-05
DAAM1	dishevelled associated activator of morphogenesis 1	protein-coding	5,71	6,5	-1,73	1,55E-06	5,54E-05
CEACAM19	CEA cell adhesion molecule 19	protein-coding	2,98	3,78	-1,73	9,47E-06	0,0002
JMY	junction mediating and regulatory protein, p53 cofactor	protein-coding	3,51	4,3	-1,73	8,59E-08	6,27E-06
UBN2	ubinuclein 2	protein-coding	3,14	3,93	-1,73	1,36E-07	9,04E-06
CCNT1	cyclin T1	protein-coding	4,22	5,01	-1,73	9,23E-08	6,60E-06
SMCR8	SMCR8-C9orf72 complex subunit	protein-coding	4,52	5,3	-1,73	2,88E-07	1,51E-05
SPART	spartin	protein-coding	5,16	5,94	-1,73	3,22E-06	9,73E-05
TYW3	tRNA-yW synthesizing protein 3 homolog	protein-coding	3,52	4,31	-1,73	1,49E-07	9,59E-06
AASS	aminoadipate-semialdehyde synthase	protein-coding	1,13	1,92	-1,73	5,48E-08	4,48E-06
TMEM106B	transmembrane protein 106B	protein-coding	4,52	5,31	-1,72	6,17E-06	0,0002
SMAD1	SMAD family member 1	protein-coding	4,03	4,81	-1,72	7,60E-09	1,06E-06
TNFRSF25	TNF receptor superfamily member 25	protein-coding	1,22	2,01	-1,72	3,67E-05	0,0007
MGC16025	uncharacterized LOC85009	ncRNA	0,8	1,59	-1,72	2,09E-05	0,0004
ATP11C	ATPase phospholipid transporting 11C	protein-coding	5,19	5,98	-1,72	9,61E-08	6,80E-06
IFNE	interferon epsilon	protein-coding	1,48	2,26	-1,72	0,0003	0,0033
CYBRD1	cytochrome b reductase 1	protein-coding	8,78	9,56	-1,72	0,0001	0,0019
HNRNPA2B1	heterogeneous nuclear ribonucleoprotein A2/B1	protein-coding	7,78	8,56	-1,72	1,82E-07	1,11E-05
STING1	stimulator of interferon response cGAMP interactor 1	protein-coding	4,75	5,53	-1,72	7,82E-06	0,0002
CREB1	cAMP responsive element binding protein 1	protein-coding	5,57	6,35	-1,72	3,79E-08	3,42E-06
NBR2	neighbor of BRCA1 lncRNA 2	ncRNA	3,42	4,2	-1,72	1,88E-05	0,0004
UFL1	UFM1 specific ligase 1	protein-coding	4,47	5,25	-1,72	8,53E-07	3,43E-05
ANKRD36	ankyrin repeat domain 36	protein-coding	3,48	4,26	-1,72	3,47E-05	0,0006
SNORA27	small nucleolar RNA, H/ACA box 27	snoRNA	4,17	4,95	-1,72	0,0003	0,0036
RUFY2	RUN and FYVE domain containing 2	protein-coding	4,12	4,9	-1,72	1,43E-09	3,39E-07
IDS	iduronate 2-sulfatase	protein-coding	6,57	7,35	-1,72	3,70E-09	6,31E-07
TNIK	TRAF2 and NCK interacting kinase	protein-coding	2,18	2,95	-1,72	0,0007	0,0061
RAB40AL	RAB40A like	protein-coding	0,17	0,95	-1,71	1,27E-09	3,15E-07
ZNF91	zinc finger protein 91	protein-coding	5,02	5,79	-1,71	8,69E-07	3,45E-05
C1QTNF3	C1q and TNF related 3	protein-coding	1,46	2,24	-1,71	0,0001	0,0016
GLIS2	GLIS family zinc finger 2	protein-coding	5,45	6,22	-1,71	5,67E-07	2,56E-05
REL	REL proto-oncogene, NF-kB subunit	protein-coding	2,88	3,66	-1,71	4,18E-09	6,91E-07
ANKRD36B	ankyrin repeat domain 36B	protein-coding	2,37	3,14	-1,71	8,78E-05	0,0013
DDHD2	DDHD domain containing 2	protein-coding	4,52	5,29	-1,71	5,57E-09	8,53E-07
NUAK1	NUAK family kinase 1	protein-coding	5,26	6,03	-1,71	0,0009	0,0076
TJP1	tight junction protein 1	protein-coding	4,38	5,15	-1,71	4,76E-09	7,58E-07
ADHFE1	alcohol dehydrogenase iron containing 1	protein-coding	1,15	1,92	-1,71	4,63E-06	0,0001
RBM25	RNA binding motif protein 25	protein-coding	5,54	6,31	-1,71	3,51E-09	6,14E-07
SH3RF1	SH3 domain containing ring finger 1	protein-coding	4,24	5,02	-1,71	6,25E-07	2,76E-05
ATP5IF1	ATP synthase inhibitory factor subunit 1	protein-coding	5,53	6,3	-1,71	6,00E-07	2,69E-05
PIK3CA	phosphatidylinositol-4,5-bisphosphate 3-kinase catalytic subunit alpha	protein-coding	4,36	5,14	-1,71	9,32E-07	3,65E-05
SLC6A6	solute carrier family 6 member 6	protein-coding	5,85	6,62	-1,71	0,0008	0,0068
RASA1	RAS p21 protein activator 1	protein-coding	5,63	6,4	-1,71	9,85E-08	6,93E-06
SERPINB9	serpin family B member 9	protein-coding	1,61	2,38	-1,7	0,0010	0,0086
DIAPH3	diaphanous related formin 3	protein-coding	2,52	3,29	-1,7	0,0007	0,0067
CHPF	chondroitin polymerizing factor	protein-coding	7	7,77	-1,7	1,53E-05	0,0003
DYRK3	dual specificity tyrosine phosphorylation regulated kinase 3	protein-coding	3,94	4,71	-1,7	3,37E-08	3,20E-06
ERLEC1	endoplasmic reticulum lectin 1	protein-coding	6,1	6,87	-1,7	2,01E-09	4,36E-07
POU2F1	POU class 2 homeobox 1	protein-coding	2,37	3,14	-1,7	1,49E-05	0,0003
TBCK	TBC1 domain containing kinase	protein-coding	5,25	6,02	-1,7	7,69E-08	5,72E-06
CDK13	cyclin dependent kinase 13	protein-coding	5,59	6,35	-1,7	1,35E-09	3,26E-07
SESN1	sestrin 1	protein-coding	3,38	4,15	-1,7	4,22E-06	0,0001
FSTL3	follistatin like 3	protein-coding	4,9	5,67	-1,7	0,0005	0,0051
SYNM	synemin	protein-coding	1,98	2,74	-1,7	2,39E-05	0,0005
HSD17B12	hydroxysteroid 17-beta dehydrogenase 12	protein-coding	5,64	6,41	-1,7	2,53E-09	5,17E-07
FAM3C	FAM3 metabolism regulating signaling molecule C	protein-coding	5,39	6,16	-1,7	1,13E-06	4,21E-05
TBC1D12	TBC1 domain family member 12	protein-coding	4,22	4,99	-1,7	1,18E-06	4,38E-05
ZNF431	zinc finger protein 431	protein-coding	3	3,77	-1,7	8,25E-10	2,35E-07
MAN2A1	mannosidase alpha class 2A member 1	protein-coding	6,33	7,09	-1,7	7,49E-08	5,61E-06
ELF1	E74 like ETS transcription factor 1	protein-coding	4,94	5,71	-1,7	6,55E-08	5,09E-06
DNAJB14	DnaJ heat shock protein family (Hsp40) member B14	protein-coding	4,44	5,2	-1,7	7,23E-08	5,45E-06
KCTD9	potassium channel tetramerization domain containing 9	protein-coding	5,02	5,78	-1,7	6,71E-07	2,86E-05
NBEA	neurobeachin	protein-coding	3,25	4,02	-1,7	0,0006	0,0059
AGL	amylo-alpha-1, 6-glucosidase, 4-alpha-glucanotransferase	protein-coding	3,75	4,51	-1,7	1,71E-06	5,94E-05
LRRC1	leucine rich repeat containing 1	protein-coding	0,86	1,62	-1,69	1,14E-05	0,0003
EML4	EMAP like 4	protein-coding	4,43	5,19	-1,69	2,25E-07	1,29E-05
TAF1D	TATA-box binding protein associated factor, RNA polymerase I subunit D	protein-coding	6,97	7,73	-1,69	2,33E-11	1,56E-08
PHF20L1	PHD finger protein 20 like 1	protein-coding	5,49	6,25	-1,69	3,81E-07	1,88E-05
VCPIP1	valosin containing protein interacting protein 1	protein-coding	3,86	4,62	-1,69	5,13E-06	0,0001
GOLGA6L5P	golgin A6 family like 5, pseudogene	pseudo	3,14	3,9	-1,69	6,34E-05	0,0010
CWF19L2	CWF19 like cell cycle control factor 2	protein-coding	3,08	3,83	-1,69	2,47E-06	7,88E-05
SLTM	SAFB like transcription modulator	protein-coding	5,15	5,91	-1,69	5,37E-08	4,47E-06
EBLN2	endogenous Bornavirus like nucleoprotein 2	protein-coding	0,86	1,62	-1,69	1,04E-08	1,29E-06
RPL29P2	ribosomal protein L29 pseudogene 2	pseudo	2,93	3,68	-1,69	8,92E-06	0,0002
DENND1A	DENN domain containing 1A	protein-coding	4,95	5,71	-1,69	4,15E-07	1,98E-05
CEP170	centrosomal protein 170	protein-coding	5,23	5,98	-1,69	3,44E-08	3,23E-06
UPF2	UPF2 regulator of nonsense mediated mRNA decay	protein-coding	4,05	4,8	-1,69	1,18E-07	8,03E-06
PTPRF	protein tyrosine phosphatase receptor type F	protein-coding	5,1	5,86	-1,69	1,44E-05	0,0003
KIAA1109	KIAA1109	protein-coding	5,24	5,99	-1,68	1,27E-07	8,54E-06
CCN2	cellular communication network factor 2	protein-coding	10,23	10,98	-1,68	0,0011	0,0088
CLK4	CDC like kinase 4	protein-coding	1,53	2,29	-1,68	0,0002	0,0021
BEND3P3	BEN domain containing 3 pseudogene 3	pseudo	2,27	3,02	-1,68	4,35E-06	0,0001
AP1G2	adaptor related protein complex 1 subunit gamma 2	protein-coding	2,62	3,37	-1,68	1,17E-05	0,0003
SMG1P1	SMG1 pseudogene 1	pseudo	6,44	7,19	-1,68	0,0001	0,0018
ZNF470	zinc finger protein 470	protein-coding	3,1	3,85	-1,68	1,54E-06	5,53E-05
CFAP70	cilia and flagella associated protein 70	protein-coding	1,01	1,76	-1,68	4,60E-05	0,0008
ZNF678	zinc finger protein 678	protein-coding	1,5	2,25	-1,68	1,68E-06	5,85E-05
NSD3	nuclear receptor binding SET domain protein 3	protein-coding	4,28	5,03	-1,68	9,85E-09	1,24E-06
CCP110	centriolar coiled-coil protein 110	protein-coding	3,29	4,04	-1,68	3,77E-05	0,0007
PWAR5	Prader Willi/Angelman region RNA 5	ncRNA	1,44	2,19	-1,68	1,95E-05	0,0004
NR1D2	nuclear receptor subfamily 1 group D member 2	protein-coding	5,51	6,26	-1,68	0,0006	0,0054
CEP43	centrosomal protein 43	protein-coding	2,97	3,72	-1,68	1,23E-06	4,51E-05
SLC26A10	solute carrier family 26 member 10	pseudo	1,8	2,55	-1,68	0,0011	0,0088
API5	apoptosis inhibitor 5	protein-coding	6,28	7,03	-1,68	3,67E-07	1,83E-05
PSD3	pleckstrin and Sec7 domain containing 3	protein-coding	4,43	5,17	-1,68	3,34E-06	1,00E-04
UBE2B	ubiquitin conjugating enzyme E2 B	protein-coding	5,84	6,58	-1,68	1,23E-06	4,51E-05
ERV3-1	endogenous retrovirus group 3 member 1, envelope	protein-coding	3,08	3,82	-1,68	0,0002	0,0021
LINC01963	long intergenic non-protein coding RNA 1963	ncRNA	3,37	4,12	-1,68	8,47E-05	0,0012
MOSPD2	motile sperm domain containing 2	protein-coding	4,84	5,59	-1,68	0,0001	0,0014
AMT	aminomethyltransferase	protein-coding	1,47	2,21	-1,67	3,79E-06	0,0001
EPB41L2	erythrocyte membrane protein band 4.1 like 2	protein-coding	5,56	6,31	-1,67	3,11E-05	0,0006
LINC02893	long intergenic non-protein coding RNA 2893	ncRNA	1,88	2,62	-1,67	0,0002	0,0028
YBX1	Y-box binding protein 1	protein-coding	8,59	9,33	-1,67	3,68E-05	0,0007
SCAF11	SR-related CTD associated factor 11	protein-coding	5,66	6,4	-1,67	2,19E-09	4,55E-07
ANKRD44	ankyrin repeat domain 44	protein-coding	1,85	2,59	-1,67	6,50E-06	0,0002
ODF2L	outer dense fiber of sperm tails 2 like	protein-coding	2,46	3,21	-1,67	3,90E-06	0,0001
RPS6KA6	ribosomal protein S6 kinase A6	protein-coding	1,65	2,39	-1,67	0,0002	0,0028
INTS6L	integrator complex subunit 6 like	protein-coding	1,51	2,25	-1,67	8,61E-06	0,0002
SLC12A2	solute carrier family 12 member 2	protein-coding	3,41	4,15	-1,67	5,37E-08	4,47E-06
HES4	hes family bHLH transcription factor 4	protein-coding	1,08	1,82	-1,67	0,0003	0,0033
PAQR3	progestin and adipoQ receptor family member 3	protein-coding	2,6	3,34	-1,67	3,19E-05	0,0006
RTL1	retrotransposon Gag like 1	protein-coding	1,34	2,08	-1,67	0,0001	0,0016
TMPPE	transmembrane protein with metallophosphoesterase domain	protein-coding	1,75	2,49	-1,67	9,52E-09	1,21E-06
PTP4A1	protein tyrosine phosphatase 4A1	protein-coding	5,5	6,24	-1,67	9,50E-06	0,0002
PHC3	polyhomeotic homolog 3	protein-coding	5,24	5,98	-1,67	2,18E-09	4,55E-07
CRIM1	cysteine rich transmembrane BMP regulator 1	protein-coding	9,66	10,4	-1,67	0,0003	0,0033
LENG9	leukocyte receptor cluster member 9	protein-coding	3,21	3,95	-1,67	9,47E-08	6,75E-06
EEA1	early endosome antigen 1	protein-coding	3,61	4,35	-1,67	3,76E-05	0,0007
STK17A	serine/threonine kinase 17a	protein-coding	5	5,74	-1,67	2,87E-08	2,81E-06
TBC1D3F	TBC1 domain family member 3F	protein-coding	2,91	3,65	-1,67	5,15E-08	4,37E-06
OSBPL1A	oxysterol binding protein like 1A	protein-coding	4,28	5,02	-1,67	0,0001	0,0016
RANBP2	RAN binding protein 2	protein-coding	4,86	5,59	-1,67	6,51E-07	2,83E-05
UAP1	UDP-N-acetylglucosamine pyrophosphorylase 1	protein-coding	6,82	7,55	-1,67	1,77E-05	0,0004
SMC6	structural maintenance of chromosomes 6	protein-coding	3,7	4,44	-1,67	1,28E-06	4,65E-05
LRIF1	ligand dependent nuclear receptor interacting factor 1	protein-coding	3,2	3,93	-1,66	1,07E-05	0,0003
PNPLA7	patatin like phospholipase domain containing 7	protein-coding	1,02	1,76	-1,66	0,0001	0,0016
SNX3	sorting nexin 3	protein-coding	7,81	8,55	-1,66	2,02E-06	6,70E-05
SNX6	sorting nexin 6	protein-coding	6,21	6,95	-1,66	0,0001	0,0016
CEP120	centrosomal protein 120	protein-coding	2,5	3,23	-1,66	3,99E-07	1,93E-05
EPS8L2	EPS8 like 2	protein-coding	3,25	3,99	-1,66	3,14E-05	0,0006
SLC25A36	solute carrier family 25 member 36	protein-coding	5,08	5,82	-1,66	3,07E-07	1,59E-05
HCFC2	host cell factor C2	protein-coding	4,47	5,2	-1,66	1,17E-05	0,0003
TBK1	TANK binding kinase 1	protein-coding	5,08	5,81	-1,66	1,56E-07	9,98E-06
NEGR1	neuronal growth regulator 1	protein-coding	4,34	5,07	-1,66	0,0004	0,0040
EIF1AX	eukaryotic translation initiation factor 1A X-linked	protein-coding	6,77	7,5	-1,66	2,95E-07	1,53E-05
ATP6V1C1	ATPase H+ transporting V1 subunit C1	protein-coding	4,94	5,67	-1,66	1,82E-06	6,24E-05
KLHL11	kelch like family member 11	protein-coding	3,63	4,36	-1,66	3,47E-07	1,75E-05
TAS2R50	taste 2 receptor member 50	protein-coding	0,36	1,09	-1,66	2,87E-07	1,51E-05
REEP3	receptor accessory protein 3	protein-coding	4,61	5,34	-1,66	6,23E-07	2,76E-05
TAS2R46	taste 2 receptor member 46	protein-coding	0,12	0,85	-1,66	3,81E-07	1,88E-05
CLIP1	CAP-Gly domain containing linker protein 1	protein-coding	5,42	6,15	-1,66	9,41E-06	0,0002
MXRA8	matrix remodeling associated 8	protein-coding	6,74	7,47	-1,66	0,0005	0,0047
ASPH	aspartate beta-hydroxylase	protein-coding	6,73	7,46	-1,66	0,0004	0,0040
LRBA	LPS responsive beige-like anchor protein	protein-coding	4,41	5,14	-1,66	1,54E-07	9,90E-06
RPL23AP32	ribosomal protein L23a pseudogene 32	pseudo	1,56	2,29	-1,66	0,0003	0,0036
ARPC3	actin related protein 2/3 complex subunit 3	protein-coding	7,18	7,91	-1,66	1,49E-05	0,0003
KCNQ1OT1	KCNQ1 opposite strand/antisense transcript 1	ncRNA	4,18	4,91	-1,66	1,89E-05	0,0004
MYSM1	Myb like, SWIRM and MPN domains 1	protein-coding	4,08	4,81	-1,66	2,14E-07	1,25E-05
EXOC6	exocyst complex component 6	protein-coding	0,95	1,68	-1,66	4,24E-06	0,0001
STXBP3	syntaxin binding protein 3	protein-coding	5,29	6,02	-1,66	3,76E-08	3,42E-06
ZNF382	zinc finger protein 382	protein-coding	1,49	2,22	-1,66	3,41E-06	0,0001
SERAC1	serine active site containing 1	protein-coding	3,76	4,49	-1,66	0,0011	0,0091
TRPC1	transient receptor potential cation channel subfamily C member 1	protein-coding	3,66	4,39	-1,66	9,93E-07	3,85E-05
OSBPL9	oxysterol binding protein like 9	protein-coding	5,41	6,13	-1,65	1,11E-07	7,66E-06
ZNF800	zinc finger protein 800	protein-coding	4,1	4,83	-1,65	5,46E-07	2,49E-05
ZMPSTE24	zinc metallopeptidase STE24	protein-coding	4,3	5,02	-1,65	4,54E-06	0,0001
ZNF195	zinc finger protein 195	protein-coding	1,86	2,59	-1,65	9,54E-06	0,0002
NEMF	nuclear export mediator factor	protein-coding	4,36	5,08	-1,65	2,64E-06	8,39E-05
FAM76B	family with sequence similarity 76 member B	protein-coding	2,9	3,63	-1,65	3,99E-07	1,93E-05
SEC11A	SEC11 homolog A, signal peptidase complex subunit	protein-coding	6,28	7	-1,65	4,87E-05	0,0008
MKLN1	muskelin 1	protein-coding	5,53	6,25	-1,65	5,51E-08	4,48E-06
PBRM1	polybromo 1	protein-coding	5,42	6,14	-1,65	2,04E-10	7,45E-08
ARL17A	ADP ribosylation factor like GTPase 17A	protein-coding	4,25	4,97	-1,65	1,84E-05	0,0004
PCM1	pericentriolar material 1	protein-coding	4,12	4,84	-1,65	7,14E-06	0,0002
C22orf46	CTA-216E10.6	pseudo	1,71	2,43	-1,65	1,72E-06	5,98E-05
ADD3	adducin 3	protein-coding	0,43	1,15	-1,65	5,04E-07	2,32E-05
UBE2H	ubiquitin conjugating enzyme E2 H	protein-coding	6,62	7,34	-1,65	6,26E-06	0,0002
DPY19L4	dpy-19 like 4	protein-coding	2,93	3,65	-1,65	2,97E-06	9,13E-05
SRRM1	serine and arginine repetitive matrix 1	protein-coding	6,8	7,52	-1,65	1,13E-08	1,39E-06
CDC5L	cell division cycle 5 like	protein-coding	5,18	5,9	-1,65	7,35E-07	3,08E-05
RAB3GAP1	RAB3 GTPase activating protein catalytic subunit 1	protein-coding	5,67	6,39	-1,64	3,55E-10	1,19E-07
MANSC1	MANSC domain containing 1	protein-coding	2,32	3,03	-1,64	0,0008	0,0071
OCLNP1	OCLN pseudogene 1	pseudo	0,67	1,39	-1,64	0,0005	0,0048
RIOK3	RIO kinase 3	protein-coding	4,12	4,84	-1,64	1,84E-06	6,26E-05
RNF207	ring finger protein 207	protein-coding	2,21	2,93	-1,64	0,0006	0,0055
CNOT6	CCR4-NOT transcription complex subunit 6	protein-coding	4,31	5,02	-1,64	5,55E-09	8,53E-07
CACNA2D1	calcium voltage-gated channel auxiliary subunit alpha2delta 1	protein-coding	4,91	5,63	-1,64	7,96E-07	3,27E-05
SNX9	sorting nexin 9	protein-coding	3,6	4,31	-1,64	2,82E-05	0,0005
CRYZL1	crystallin zeta like 1	protein-coding	5,12	5,84	-1,64	1,99E-08	2,20E-06
RB1	RB transcriptional corepressor 1	protein-coding	5,13	5,84	-1,64	7,63E-06	0,0002
AKAP11	A-kinase anchoring protein 11	protein-coding	5,27	5,99	-1,64	1,28E-07	8,60E-06
AKAP9	A-kinase anchoring protein 9	protein-coding	3,62	4,34	-1,64	8,78E-05	0,0013
MYCBP2	MYC binding protein 2	protein-coding	5,13	5,84	-1,64	9,66E-06	0,0002
STAM	signal transducing adaptor molecule	protein-coding	3,88	4,59	-1,64	2,49E-05	0,0005
SUCLA2	succinate-CoA ligase ADP-forming subunit beta	protein-coding	4,39	5,1	-1,64	4,50E-06	0,0001
TMEM135	transmembrane protein 135	protein-coding	3,91	4,62	-1,64	5,82E-07	2,61E-05
SIPA1L1	signal induced proliferation associated 1 like 1	protein-coding	5,11	5,82	-1,64	1,94E-06	6,53E-05
SMIM14	small integral membrane protein 14	protein-coding	5,53	6,25	-1,64	6,37E-08	4,98E-06
SEC24A	SEC24 homolog A, COPII coat complex component	protein-coding	4,68	5,4	-1,64	5,29E-06	0,0001
MID2	midline 2	protein-coding	3,58	4,29	-1,64	8,60E-07	3,44E-05
CENPT	centromere protein T	protein-coding	0,93	1,64	-1,64	7,43E-06	0,0002
ANKRD26	ankyrin repeat domain 26	protein-coding	2,79	3,5	-1,64	9,40E-07	3,67E-05
ZNF670	zinc finger protein 670	protein-coding	1,88	2,59	-1,64	9,77E-05	0,0014
LYRM9	LYR motif containing 9	protein-coding	2,67	3,38	-1,64	1,73E-05	0,0004
ZNF117	zinc finger protein 117	protein-coding	2,67	3,38	-1,64	0,0005	0,0047
KPNA5	karyopherin subunit alpha 5	protein-coding	3,07	3,78	-1,63	8,41E-08	6,16E-06
WNT2B	Wnt family member 2B	protein-coding	0,92	1,63	-1,63	3,35E-05	0,0006
MAF	MAF bZIP transcription factor	protein-coding	0,51	1,22	-1,63	0,0002	0,0025
ZNF121	zinc finger protein 121	protein-coding	4,01	4,72	-1,63	1,99E-07	1,18E-05
ATP8B3	ATPase phospholipid transporting 8B3	protein-coding	1,86	2,57	-1,63	5,44E-05	0,0009
VPS8	VPS8 subunit of CORVET complex	protein-coding	4,71	5,42	-1,63	6,38E-06	0,0002
ZNF432	zinc finger protein 432	protein-coding	3,66	4,37	-1,63	2,12E-07	1,25E-05
PUS7L	pseudouridine synthase 7 like	protein-coding	3,1	3,81	-1,63	1,95E-06	6,56E-05
RASSF9	Ras association domain family member 9	protein-coding	1,39	2,09	-1,63	0,0006	0,0055
LRRC37A3	leucine rich repeat containing 37 member A3	protein-coding	1,43	2,13	-1,63	9,36E-06	0,0002
HOXD4	homeobox D4	protein-coding	2,64	3,35	-1,63	0,0006	0,0055
SUMO1P3	SUMO1 pseudogene 3	pseudo	6,35	7,06	-1,63	6,93E-08	5,32E-06
SLC30A9	solute carrier family 30 member 9	protein-coding	5,48	6,18	-1,63	4,77E-08	4,15E-06
ATG2B	autophagy related 2B	protein-coding	5	5,71	-1,63	3,37E-09	6,13E-07
NF1	neurofibromin 1	protein-coding	4,23	4,93	-1,63	2,26E-08	2,45E-06
LY6G5B	lymphocyte antigen 6 family member G5B	protein-coding	3,27	3,98	-1,63	1,22E-05	0,0003
MFSD8	major facilitator superfamily domain containing 8	protein-coding	2,57	3,27	-1,63	1,22E-09	3,10E-07
CDK17	cyclin dependent kinase 17	protein-coding	5,13	5,83	-1,63	7,79E-09	1,07E-06
EFCAB7	EF-hand calcium binding domain 7	protein-coding	1,59	2,29	-1,63	1,11E-06	4,16E-05
MACF1	microtubule actin crosslinking factor 1	protein-coding	6,18	6,89	-1,63	4,34E-08	3,84E-06
SNX30	sorting nexin family member 30	protein-coding	5,2	5,91	-1,63	6,03E-06	0,0002
PEX3	peroxisomal biogenesis factor 3	protein-coding	4,48	5,18	-1,63	8,65E-11	4,19E-08
VRK2	VRK serine/threonine kinase 2	protein-coding	4,1	4,8	-1,63	1,88E-06	6,36E-05
SLC2A3	solute carrier family 2 member 3	protein-coding	7,15	7,86	-1,63	4,85E-08	4,18E-06
CHPF2	chondroitin polymerizing factor 2	protein-coding	5,44	6,14	-1,63	8,69E-06	0,0002
REST	RE1 silencing transcription factor	protein-coding	4,87	5,57	-1,63	1,18E-08	1,43E-06
MDH1	malate dehydrogenase 1	protein-coding	6,39	7,09	-1,63	2,91E-06	9,00E-05
CCDC191	coiled-coil domain containing 191	protein-coding	1,21	1,91	-1,63	6,80E-06	0,0002
ZNF514	zinc finger protein 514	protein-coding	3,47	4,17	-1,62	1,38E-07	9,10E-06
BTBD19	BTB domain containing 19	protein-coding	3,42	4,12	-1,62	1,05E-05	0,0002
RNMT	RNA guanine-7 methyltransferase	protein-coding	3,87	4,57	-1,62	1,40E-07	9,16E-06
NCL	nucleolin	protein-coding	7,23	7,92	-1,62	3,59E-05	0,0006
ZWILCH	zwilch kinetochore protein	protein-coding	3,74	4,43	-1,62	0,0003	0,0036
LAT	linker for activation of T cells	protein-coding	0,81	1,51	-1,62	6,56E-07	2,84E-05
XGY2	XG pseudogene, Y-linked 2	pseudo	-0,01	0,68	-1,62	8,31E-07	3,38E-05
LPAR6	lysophosphatidic acid receptor 6	protein-coding	0,78	1,48	-1,62	1,14E-06	4,25E-05
GRK5	G protein-coupled receptor kinase 5	protein-coding	4,85	5,55	-1,62	0,0001	0,0017
MSH5	mutS homolog 5	protein-coding	1,22	1,91	-1,62	3,28E-06	9,91E-05
APPL1	adaptor protein, phosphotyrosine interacting with PH domain and leucine zipper 1	protein-coding	4,38	5,07	-1,62	1,24E-07	8,38E-06
NOL8	nucleolar protein 8	protein-coding	3,68	4,37	-1,62	9,00E-07	3,55E-05
INTS3	integrator complex subunit 3	protein-coding	5,18	5,87	-1,62	4,89E-07	2,27E-05
PPP4R1L	protein phosphatase 4 regulatory subunit 1 like (pseudogene)	pseudo	2,41	3,11	-1,62	3,44E-07	1,74E-05
NFAT5	nuclear factor of activated T cells 5	protein-coding	6,19	6,88	-1,62	4,66E-06	0,0001
BRWD3	bromodomain and WD repeat domain containing 3	protein-coding	2,65	3,34	-1,62	1,17E-05	0,0003
MYH10	myosin heavy chain 10	protein-coding	6,55	7,24	-1,62	0,0003	0,0036
RAB11FIP2	RAB11 family interacting protein 2	protein-coding	4,75	5,44	-1,62	3,18E-05	0,0006
FAM98B	family with sequence similarity 98 member B	protein-coding	3,45	4,14	-1,62	6,07E-05	0,0010
ITFG1	integrin alpha FG-GAP repeat containing 1	protein-coding	5,83	6,52	-1,62	6,07E-07	2,71E-05
RARA	retinoic acid receptor alpha	protein-coding	4,42	5,12	-1,62	2,03E-05	0,0004
SMIM8	small integral membrane protein 8	protein-coding	2,77	3,46	-1,62	6,49E-06	0,0002
AK4	adenylate kinase 4	protein-coding	5,97	6,66	-1,62	0,0005	0,0051
UPF3B	UPF3B regulator of nonsense mediated mRNA decay	protein-coding	3,73	4,42	-1,62	0,0003	0,0036
SLC35F5	solute carrier family 35 member F5	protein-coding	5,88	6,57	-1,62	3,96E-08	3,53E-06
ZMYND8	zinc finger MYND-type containing 8	protein-coding	3,01	3,7	-1,62	3,33E-07	1,70E-05
LINC00997	long intergenic non-protein coding RNA 997	ncRNA	2,49	3,19	-1,62	4,88E-05	0,0008
DOCK9	dedicator of cytokinesis 9	protein-coding	2,92	3,62	-1,62	6,65E-05	0,0010
ZNF37A	zinc finger protein 37A	protein-coding	4,34	5,03	-1,61	6,84E-09	9,75E-07
CENATAC	centrosomal AT-AC splicing factor	protein-coding	3,2	3,89	-1,61	1,57E-06	5,59E-05
SLF2	SMC5-SMC6 complex localization factor 2	protein-coding	4,26	4,95	-1,61	3,81E-07	1,88E-05
FUBP1	far upstream element binding protein 1	protein-coding	5,38	6,07	-1,61	1,16E-07	7,97E-06
BRWD1	bromodomain and WD repeat domain containing 1	protein-coding	5,52	6,21	-1,61	6,09E-07	2,71E-05
CEP350	centrosomal protein 350	protein-coding	4,91	5,6	-1,61	2,56E-07	1,41E-05
LOC100132356	uncharacterized LOC100132356	ncRNA	2,34	3,03	-1,61	1,22E-06	4,51E-05
NPIPB5	nuclear pore complex interacting protein family member B5	protein-coding	4,51	5,2	-1,61	6,42E-06	0,0002
ZNF354A	zinc finger protein 354A	protein-coding	2,04	2,73	-1,61	2,63E-08	2,69E-06
PAXBP1	PAX3 and PAX7 binding protein 1	protein-coding	2,22	2,9	-1,61	8,37E-07	3,39E-05
NAE1	NEDD8 activating enzyme E1 subunit 1	protein-coding	4,48	5,17	-1,61	3,13E-08	3,05E-06
ZNF766	zinc finger protein 766	protein-coding	3,43	4,12	-1,61	2,10E-09	4,46E-07
ARL17B	ADP ribosylation factor like GTPase 17B	protein-coding	0,77	1,46	-1,61	2,35E-05	0,0005
DDHD1	DDHD domain containing 1	protein-coding	3,8	4,48	-1,61	1,50E-06	5,41E-05
EIF5B	eukaryotic translation initiation factor 5B	protein-coding	6,63	7,31	-1,61	1,12E-06	4,18E-05
CCDC148	coiled-coil domain containing 148	protein-coding	0,42	1,11	-1,61	0,0002	0,0028
UBR4	ubiquitin protein ligase E3 component n-recognin 4	protein-coding	7,35	8,04	-1,61	8,00E-06	0,0002
SCRN3	secernin 3	protein-coding	2,78	3,47	-1,61	8,69E-07	3,45E-05
FUS	FUS RNA binding protein	protein-coding	5,58	6,27	-1,61	2,62E-05	0,0005
RAB8B	RAB8B, member RAS oncogene family	protein-coding	6,48	7,17	-1,61	0,0004	0,0038
LIPA	lipase A, lysosomal acid type	protein-coding	5,96	6,64	-1,6	0,0002	0,0022
CAND1	cullin associated and neddylation dissociated 1	protein-coding	4,73	5,42	-1,6	1,62E-07	1,02E-05
TM9SF2	transmembrane 9 superfamily member 2	protein-coding	6,92	7,6	-1,6	8,52E-06	0,0002
CFAP44	cilia and flagella associated protein 44	protein-coding	0,92	1,6	-1,6	2,62E-05	0,0005
VPS13B	vacuolar protein sorting 13 homolog B	protein-coding	4,7	5,38	-1,6	4,64E-05	0,0008
ZC3H13	zinc finger CCCH-type containing 13	protein-coding	6,5	7,18	-1,6	6,92E-06	0,0002
FAM200A	family with sequence similarity 200 member A	protein-coding	1,91	2,59	-1,6	5,97E-08	4,74E-06
TTC3P1	tetratricopeptide repeat domain 3 pseudogene 1	pseudo	1,76	2,44	-1,6	0,0002	0,0025
SLC23A2	solute carrier family 23 member 2	protein-coding	3,48	4,16	-1,6	4,87E-05	0,0008
AURKAP1	aurora kinase A pseudogene 1	pseudo	1,55	2,23	-1,6	5,79E-06	0,0002
ALKBH8	alkB homolog 8, tRNA methyltransferase	protein-coding	2,97	3,65	-1,6	1,52E-05	0,0003
SHPRH	SNF2 histone linker PHD RING helicase	protein-coding	3,06	3,74	-1,6	4,39E-05	0,0007
LINC00265	long intergenic non-protein coding RNA 265	ncRNA	1,88	2,56	-1,6	2,74E-05	0,0005
RNPC3	RNA binding region (RNP1, RRM) containing 3	protein-coding	3,94	4,61	-1,6	1,58E-05	0,0003
BOD1L1	biorientation of chromosomes in cell division 1 like 1	protein-coding	3,99	4,67	-1,6	2,81E-07	1,49E-05
PNISR	PNN interacting serine and arginine rich protein	protein-coding	6,71	7,38	-1,6	3,73E-07	1,86E-05
RGPD2	RANBP2 like and GRIP domain containing 2	protein-coding	0,12	0,8	-1,6	4,06E-05	0,0007
ANKRD42	ankyrin repeat domain 42	protein-coding	3,69	4,37	-1,6	7,81E-05	0,0012
METTL14	methyltransferase 14, N6-adenosine-methyltransferase subunit	protein-coding	2,63	3,31	-1,6	1,73E-05	0,0004
SUCO	SUN domain containing ossification factor	protein-coding	5	5,68	-1,6	1,01E-06	3,85E-05
VMP1	vacuole membrane protein 1	protein-coding	7,47	8,15	-1,6	6,71E-06	0,0002
REC8	REC8 meiotic recombination protein	protein-coding	1,5	2,18	-1,6	0,0002	0,0024
LTB4R2	leukotriene B4 receptor 2	protein-coding	0,91	1,58	-1,6	4,94E-06	0,0001
STT3B	STT3 oligosaccharyltransferase complex catalytic subunit B	protein-coding	5,94	6,61	-1,6	6,45E-07	2,83E-05
ZDHHC17	zinc finger DHHC-type palmitoyltransferase 17	protein-coding	4,42	5,1	-1,6	5,29E-08	4,46E-06
SLC46A3	solute carrier family 46 member 3	protein-coding	2,49	3,16	-1,6	0,0010	0,0083
KIAA0825	KIAA0825	protein-coding	1,81	2,48	-1,6	8,17E-06	0,0002
IFT46	intraflagellar transport 46	protein-coding	4,61	5,28	-1,59	7,37E-07	3,08E-05
SYNE1	spectrin repeat containing nuclear envelope protein 1	protein-coding	5,75	6,42	-1,59	9,31E-06	0,0002
MACROD2	mono-ADP ribosylhydrolase 2	protein-coding	1,1	1,77	-1,59	0,0004	0,0043
YTHDC1	YTH domain containing 1	protein-coding	5,35	6,02	-1,59	8,80E-08	6,38E-06
SLC12A6	solute carrier family 12 member 6	protein-coding	3,57	4,24	-1,59	7,67E-06	0,0002
SBF2	SET binding factor 2	protein-coding	6,57	7,25	-1,59	9,67E-05	0,0014
NCOA3	nuclear receptor coactivator 3	protein-coding	5,66	6,33	-1,59	1,65E-09	3,81E-07
TBC1D2	TBC1 domain family member 2	protein-coding	3,34	4,02	-1,59	0,0003	0,0032
KDM7A	lysine demethylase 7A	protein-coding	4,25	4,92	-1,59	5,33E-06	0,0001
TEP1	telomerase associated protein 1	protein-coding	2,77	3,44	-1,59	7,79E-08	5,75E-06
TCAIM	T cell activation inhibitor, mitochondrial	protein-coding	2,48	3,15	-1,59	8,87E-06	0,0002
ZNF445	zinc finger protein 445	protein-coding	3,97	4,64	-1,59	2,68E-09	5,42E-07
GLTP	glycolipid transfer protein	protein-coding	3,99	4,66	-1,59	3,33E-06	9,99E-05
SUN1	Sad1 and UNC84 domain containing 1	protein-coding	7,37	8,04	-1,59	1,88E-05	0,0004
ERCC6L2	ERCC excision repair 6 like 2	protein-coding	4,65	5,32	-1,59	1,00E-07	6,98E-06
USP15	ubiquitin specific peptidase 15	protein-coding	3,66	4,33	-1,59	3,71E-06	0,0001
UBE2Q2P2	ubiquitin conjugating enzyme E2 Q2 pseudogene 2	pseudo	1,34	2,01	-1,59	1,01E-05	0,0002
VDAC3	voltage dependent anion channel 3	protein-coding	5,79	6,46	-1,59	1,55E-06	5,54E-05
ZNF507	zinc finger protein 507	protein-coding	4	4,67	-1,59	3,55E-05	0,0006
ZC2HC1A	zinc finger C2HC-type containing 1A	protein-coding	3,53	4,2	-1,59	4,77E-05	0,0008
MOB1B	MOB kinase activator 1B	protein-coding	4,67	5,34	-1,59	1,48E-06	5,32E-05
CTNNA1	catenin alpha 1	protein-coding	8,37	9,04	-1,59	1,46E-07	9,46E-06
ASAP1	ArfGAP with SH3 domain, ankyrin repeat and PH domain 1	protein-coding	7,04	7,71	-1,59	5,57E-05	0,0009
RNF170	ring finger protein 170	protein-coding	3,13	3,8	-1,59	7,12E-07	3,00E-05
ALG13	ALG13 UDP-N-acetylglucosaminyltransferase subunit	protein-coding	3,91	4,57	-1,59	3,63E-07	1,81E-05
ZNF449	zinc finger protein 449	protein-coding	2,92	3,59	-1,59	0,0002	0,0024
CIRBP	cold inducible RNA binding protein	protein-coding	7,3	7,97	-1,59	3,51E-06	0,0001
ARL15	ADP ribosylation factor like GTPase 15	protein-coding	2,85	3,52	-1,59	1,33E-05	0,0003
ZNF131	zinc finger protein 131	protein-coding	3,75	4,42	-1,59	5,12E-06	0,0001
JADE1	jade family PHD finger 1	protein-coding	5,03	5,69	-1,59	3,90E-05	0,0007
SPAG9	sperm associated antigen 9	protein-coding	6,61	7,28	-1,59	7,72E-09	1,06E-06
DDAH1	dimethylarginine dimethylaminohydrolase 1	protein-coding	7,4	8,06	-1,59	0,0002	0,0026
PALS1	protein associated with LIN7 1, MAGUK p55 family member	protein-coding	3,48	4,15	-1,59	1,62E-05	0,0003
SZT2	SZT2 subunit of KICSTOR complex	protein-coding	4,31	4,98	-1,58	5,72E-07	2,57E-05
PIK3C2B	phosphatidylinositol-4-phosphate 3-kinase catalytic subunit type 2 beta	protein-coding	1,3	1,97	-1,58	0,0005	0,0051
RBM41	RNA binding motif protein 41	protein-coding	2,56	3,23	-1,58	1,75E-06	6,02E-05
RNF13	ring finger protein 13	protein-coding	4,97	5,63	-1,58	2,00E-07	1,19E-05
THOC2	THO complex 2	protein-coding	5,15	5,81	-1,58	2,87E-06	8,91E-05
SMG6	SMG6 nonsense mediated mRNA decay factor	protein-coding	5,52	6,18	-1,58	0,0007	0,0063
JMJD1C-AS1	JMJD1C antisense RNA 1	ncRNA	1,49	2,16	-1,58	1,11E-06	4,16E-05
RASSF8	Ras association domain family member 8	protein-coding	5,8	6,46	-1,58	0,0006	0,0055
BMPR2	bone morphogenetic protein receptor type 2	protein-coding	6,8	7,47	-1,58	5,51E-10	1,71E-07
POU5F2	POU domain class 5, transcription factor 2	protein-coding	0,06	0,72	-1,58	1,82E-10	6,88E-08
BMP2K	BMP2 inducible kinase	protein-coding	4,9	5,56	-1,58	0,0010	0,0081
VN1R1	vomeronasal 1 receptor 1	protein-coding	0,89	1,56	-1,58	1,05E-05	0,0002
GFPT2	glutamine-fructose-6-phosphate transaminase 2	protein-coding	4,99	5,65	-1,58	0,0012	0,0094
RBM39	RNA binding motif protein 39	protein-coding	7,58	8,24	-1,58	3,34E-09	6,13E-07
WDR36	WD repeat domain 36	protein-coding	4,41	5,07	-1,58	2,99E-05	0,0006
NUBPL	nucleotide binding protein like	protein-coding	2,55	3,21	-1,58	1,46E-05	0,0003
HINT3	histidine triad nucleotide binding protein 3	protein-coding	3,74	4,39	-1,58	0,0002	0,0021
RNF217	ring finger protein 217	protein-coding	3,98	4,64	-1,58	3,64E-05	0,0007
SS18	SS18 subunit of BAF chromatin remodeling complex	protein-coding	6,06	6,72	-1,58	1,72E-08	1,99E-06
FER	FER tyrosine kinase	protein-coding	3,95	4,61	-1,58	1,00E-06	3,85E-05
ABCC5	ATP binding cassette subfamily C member 5	protein-coding	3,64	4,3	-1,58	1,76E-08	2,01E-06
LINC00674	long intergenic non-protein coding RNA 674	ncRNA	5,33	5,99	-1,58	1,40E-05	0,0003
CILK1	ciliogenesis associated kinase 1	protein-coding	4,28	4,93	-1,58	2,16E-07	1,26E-05
GPR135	G protein-coupled receptor 135	protein-coding	2,23	2,89	-1,58	0,0003	0,0035
BROX	BRO1 domain and CAAX motif containing	protein-coding	3,81	4,46	-1,58	5,91E-05	0,0009
ZNF471	zinc finger protein 471	protein-coding	3,33	3,98	-1,58	0,0002	0,0026
DHX29	DExH-box helicase 29	protein-coding	5,27	5,93	-1,58	7,53E-08	5,61E-06
CCDC186	coiled-coil domain containing 186	protein-coding	4,15	4,8	-1,57	0,0007	0,0066
ZNF354B	zinc finger protein 354B	protein-coding	1,86	2,52	-1,57	0,0001	0,0016
ERC1	ELKS/RAB6-interacting/CAST family member 1	protein-coding	4,66	5,32	-1,57	1,33E-08	1,59E-06
ZFHX3	zinc finger homeobox 3	protein-coding	5,17	5,83	-1,57	3,15E-07	1,62E-05
FYCO1	FYVE and coiled-coil domain autophagy adaptor 1	protein-coding	5,11	5,76	-1,57	0,0003	0,0031
CSAD	cysteine sulfinic acid decarboxylase	protein-coding	2,93	3,59	-1,57	1,90E-05	0,0004
DNAH1	dynein axonemal heavy chain 1	protein-coding	1,38	2,03	-1,57	1,38E-05	0,0003
CCSAP	centriole, cilia and spindle associated protein	protein-coding	3,97	4,63	-1,57	0,0003	0,0036
PRMT9	protein arginine methyltransferase 9	protein-coding	4,47	5,13	-1,57	7,26E-05	0,0011
GAS5-AS1	GAS5 antisense RNA 1	ncRNA	2,69	3,34	-1,57	1,34E-05	0,0003
G2E3	G2/M-phase specific E3 ubiquitin protein ligase	protein-coding	2,7	3,35	-1,57	9,54E-06	0,0002
DDX52	DExD-box helicase 52	protein-coding	4,31	4,96	-1,57	1,24E-06	4,54E-05
SP100	SP100 nuclear antigen	protein-coding	4,72	5,37	-1,57	0,0002	0,0025
LINC00174	long intergenic non-protein coding RNA 174	ncRNA	1,29	1,94	-1,57	1,16E-06	4,31E-05
FAM126B	family with sequence similarity 126 member B	protein-coding	3,3	3,95	-1,57	2,60E-07	1,42E-05
TRAPPC8	trafficking protein particle complex subunit 8	protein-coding	4,85	5,5	-1,57	4,91E-07	2,27E-05
L2HGDH	L-2-hydroxyglutarate dehydrogenase	protein-coding	1,46	2,11	-1,57	1,07E-07	7,40E-06
SNORA70E	small nucleolar RNA, H/ACA box 70E	snoRNA	0,59	1,24	-1,57	8,97E-05	0,0013
SMAD3	SMAD family member 3	protein-coding	6,51	7,16	-1,57	0,0004	0,0044
ZNF841	zinc finger protein 841	protein-coding	4,8	5,45	-1,57	7,02E-09	9,93E-07
NCBP2	nuclear cap binding protein subunit 2	protein-coding	5,37	6,02	-1,57	1,65E-07	1,03E-05
PTPN11	protein tyrosine phosphatase non-receptor type 11	protein-coding	6,43	7,07	-1,57	1,88E-05	0,0004
PSMA3-AS1	PSMA3 antisense RNA 1	ncRNA	3,37	4,02	-1,57	3,65E-08	3,40E-06
CLASP2	cytoplasmic linker associated protein 2	protein-coding	3,63	4,27	-1,57	3,84E-07	1,89E-05
GCNT4	glucosaminyl (N-acetyl) transferase 4	protein-coding	0,34	0,99	-1,57	1,69E-05	0,0004
ERMP1	endoplasmic reticulum metallopeptidase 1	protein-coding	3,19	3,84	-1,57	1,94E-07	1,16E-05
KLHL24	kelch like family member 24	protein-coding	3,69	4,34	-1,57	7,07E-05	0,0011
MIER3	MIER family member 3	protein-coding	3,03	3,68	-1,57	8,51E-06	0,0002
CPNE3	copine 3	protein-coding	5,5	6,15	-1,57	8,18E-06	0,0002
ROCK2	Rho associated coiled-coil containing protein kinase 2	protein-coding	6,65	7,3	-1,57	9,86E-06	0,0002
TRIM33	tripartite motif containing 33	protein-coding	3,25	3,89	-1,57	2,12E-05	0,0004
BAZ2B	bromodomain adjacent to zinc finger domain 2B	protein-coding	3,17	3,81	-1,57	4,83E-05	0,0008
RMDN1	regulator of microtubule dynamics 1	protein-coding	4,79	5,43	-1,57	1,55E-06	5,54E-05
STAG2	stromal antigen 2	protein-coding	2,62	3,26	-1,57	2,21E-05	0,0004
TMEM87B	transmembrane protein 87B	protein-coding	4,77	5,42	-1,56	8,75E-06	0,0002
PGRMC2	progesterone receptor membrane component 2	protein-coding	6,56	7,21	-1,56	6,92E-05	0,0011
ITGB5	integrin subunit beta 5	protein-coding	6,94	7,59	-1,56	0,0003	0,0030
PLA2G6	phospholipase A2 group VI	protein-coding	2,06	2,71	-1,56	0,0002	0,0027
TFRC	transferrin receptor	protein-coding	6,51	7,15	-1,56	5,70E-05	0,0009
ZNF462	zinc finger protein 462	protein-coding	2,76	3,4	-1,56	0,0003	0,0029
MMUT	methylmalonyl-CoA mutase	protein-coding	4,68	5,32	-1,56	2,65E-07	1,44E-05
MINDY2	MINDY lysine 48 deubiquitinase 2	protein-coding	3,95	4,6	-1,56	7,14E-05	0,0011
ZNF665	zinc finger protein 665	protein-coding	1,92	2,56	-1,56	1,13E-05	0,0003
TRAPPC3	trafficking protein particle complex subunit 3	protein-coding	5,54	6,18	-1,56	3,14E-06	9,58E-05
HEATR1	HEAT repeat containing 1	protein-coding	5,37	6,01	-1,56	2,50E-08	2,60E-06
ELP1	elongator acetyltransferase complex subunit 1	protein-coding	4,9	5,54	-1,56	7,97E-07	3,27E-05
DCP2	decapping mRNA 2	protein-coding	3,9	4,54	-1,56	2,69E-06	8,49E-05
BMP4	bone morphogenetic protein 4	protein-coding	0,11	0,76	-1,56	0,0006	0,0058
FAM199X	family with sequence similarity 199, X-linked	protein-coding	2,86	3,5	-1,56	4,06E-07	1,95E-05
ZBTB20	zinc finger and BTB domain containing 20	protein-coding	0,99	1,63	-1,56	0,0001	0,0018
ZNF106	zinc finger protein 106	protein-coding	5,07	5,71	-1,56	6,29E-07	2,77E-05
HERC2P9	HERC2 pseudogene 9	pseudo	2,62	3,26	-1,56	0,0002	0,0027
SETDB2	SET domain bifurcated histone lysine methyltransferase 2	protein-coding	2,76	3,4	-1,56	0,0002	0,0022
LRP1	LDL receptor related protein 1	protein-coding	9,65	10,29	-1,56	7,92E-07	3,27E-05
NAP1L1	nucleosome assembly protein 1 like 1	protein-coding	7,5	8,14	-1,56	1,39E-05	0,0003
ARPC1A	actin related protein 2/3 complex subunit 1A	protein-coding	5,79	6,43	-1,56	3,79E-06	0,0001
AVPI1	arginine vasopressin induced 1	protein-coding	5,16	5,8	-1,56	0,0005	0,0045
CNOT4	CCR4-NOT transcription complex subunit 4	protein-coding	5,84	6,48	-1,56	0,0005	0,0051
NPEPPSP1	NPEPPS pseudogene 1	pseudo	5,16	5,8	-1,56	7,85E-09	1,07E-06
NIT2	nitrilase family member 2	protein-coding	3,99	4,63	-1,56	2,34E-07	1,31E-05
PHF3	PHD finger protein 3	protein-coding	4,76	5,4	-1,56	0,0001	0,0017
TLK2	tousled like kinase 2	protein-coding	5,44	6,08	-1,56	4,51E-09	7,28E-07
MYADM	myeloid associated differentiation marker	protein-coding	7,78	8,42	-1,56	0,0001	0,0015
PSMG2	proteasome assembly chaperone 2	protein-coding	5,63	6,27	-1,56	6,67E-06	0,0002
EVC	EvC ciliary complex subunit 1	protein-coding	5,43	6,07	-1,56	9,07E-05	0,0013
DYNC2LI1	dynein cytoplasmic 2 light intermediate chain 1	protein-coding	3,53	4,16	-1,56	1,70E-05	0,0004
PLEC	plectin	protein-coding	6,23	6,87	-1,56	0,0002	0,0022
KIAA1143	KIAA1143	protein-coding	5,16	5,8	-1,56	2,52E-05	0,0005
MTX3	metaxin 3	protein-coding	3,78	4,42	-1,56	3,04E-06	9,31E-05
DCUN1D5	defective in cullin neddylation 1 domain containing 5	protein-coding	4,83	5,47	-1,56	5,19E-05	0,0009
ZUP1	zinc finger containing ubiquitin peptidase 1	protein-coding	3,36	4	-1,56	5,02E-08	4,28E-06
NUDT12	nudix hydrolase 12	protein-coding	1,82	2,46	-1,56	0,0009	0,0078
MED1	mediator complex subunit 1	protein-coding	4,64	5,28	-1,56	2,67E-08	2,69E-06
LTBP3	latent transforming growth factor beta binding protein 3	protein-coding	7,65	8,28	-1,55	4,72E-05	0,0008
SLC37A3	solute carrier family 37 member 3	protein-coding	4,76	5,4	-1,55	1,85E-06	6,30E-05
SH3GL1P1	SH3 domain containing GRB2 like 1, endophilin A2 pseudogene 1	pseudo	1,06	1,7	-1,55	3,18E-06	9,66E-05
CREBZF	CREB/ATF bZIP transcription factor	protein-coding	4	4,63	-1,55	1,63E-07	1,02E-05
BACH1	BTB domain and CNC homolog 1	protein-coding	3,49	4,13	-1,55	8,39E-05	0,0012
RPL6	ribosomal protein L6	protein-coding	9,18	9,82	-1,55	0,0002	0,0026
ATXN1	ataxin 1	protein-coding	4,41	5,05	-1,55	8,78E-06	0,0002
MPC1	mitochondrial pyruvate carrier 1	protein-coding	5,41	6,05	-1,55	2,26E-07	1,29E-05
OGA	O-GlcNAcase	protein-coding	7,45	8,08	-1,55	1,13E-09	2,91E-07
ZNF107	zinc finger protein 107	protein-coding	1,3	1,94	-1,55	2,15E-05	0,0004
SLC35D1	solute carrier family 35 member D1	protein-coding	4,09	4,72	-1,55	4,76E-07	2,23E-05
MSANTD2	Myb/SANT DNA binding domain containing 2	protein-coding	2,51	3,15	-1,55	9,39E-06	0,0002
ZFP14	ZFP14 zinc finger protein	protein-coding	2,18	2,81	-1,55	1,59E-05	0,0003
CBWD2	COBW domain containing 2	protein-coding	4,34	4,97	-1,55	5,90E-09	8,76E-07
STRN	striatin	protein-coding	4,06	4,7	-1,55	6,15E-07	2,74E-05
DONSON	DNA replication fork stabilization factor DONSON	protein-coding	2,15	2,79	-1,55	0,0004	0,0038
ZNF570	zinc finger protein 570	protein-coding	2,61	3,24	-1,55	4,26E-05	0,0007
YTHDC2	YTH domain containing 2	protein-coding	2,29	2,92	-1,55	1,75E-05	0,0004
ST3GAL5	ST3 beta-galactoside alpha-2,3-sialyltransferase 5	protein-coding	0,6	1,23	-1,55	3,30E-06	9,93E-05
RESF1	retroelement silencing factor 1	protein-coding	2,66	3,29	-1,55	0,0001	0,0014
MTPN	myotrophin	protein-coding	6,08	6,71	-1,55	1,66E-06	5,84E-05
BTG1	BTG anti-proliferation factor 1	protein-coding	7,08	7,71	-1,55	8,09E-05	0,0012
MPHOSPH9	M-phase phosphoprotein 9	protein-coding	2,75	3,38	-1,55	1,37E-05	0,0003
AGA	aspartylglucosaminidase	protein-coding	4,6	5,23	-1,55	9,88E-05	0,0014
RAP1A	RAP1A, member of RAS oncogene family	protein-coding	5,94	6,57	-1,55	6,82E-06	0,0002
KIAA0586	KIAA0586	protein-coding	2,03	2,66	-1,55	8,44E-05	0,0012
SOWAHC	sosondowah ankyrin repeat domain family member C	protein-coding	4,25	4,88	-1,55	0,0003	0,0032
MCU	mitochondrial calcium uniporter	protein-coding	2,97	3,6	-1,55	7,02E-06	0,0002
ADAT2	adenosine deaminase tRNA specific 2	protein-coding	1,34	1,97	-1,55	2,95E-05	0,0006
DGKH	diacylglycerol kinase eta	protein-coding	3,35	3,98	-1,55	1,61E-06	5,71E-05
MAN1A2	mannosidase alpha class 1A member 2	protein-coding	4,79	5,42	-1,55	1,77E-07	1,09E-05
MEG8	maternally expressed 8, small nucleolar RNA host gene	ncRNA	3,45	4,08	-1,55	0,0003	0,0034
PPM1B	protein phosphatase, Mg2+/Mn2+ dependent 1B	protein-coding	4,3	4,92	-1,55	1,86E-07	1,13E-05
AXL	AXL receptor tyrosine kinase	protein-coding	5,95	6,58	-1,54	0,0002	0,0025
SLK	STE20 like kinase	protein-coding	5,2	5,82	-1,54	2,89E-05	0,0005
ARIH1	ariadne RBR E3 ubiquitin protein ligase 1	protein-coding	5,09	5,71	-1,54	2,63E-07	1,43E-05
PLA2G12A	phospholipase A2 group XIIA	protein-coding	4,03	4,65	-1,54	7,38E-07	3,08E-05
CYP2U1	cytochrome P450 family 2 subfamily U member 1	protein-coding	3,55	4,18	-1,54	0,0007	0,0065
ZNF441	zinc finger protein 441	protein-coding	2,64	3,26	-1,54	4,97E-05	0,0008
INO80D	INO80 complex subunit D	protein-coding	4	4,63	-1,54	1,93E-06	6,52E-05
PRRC2C	proline rich coiled-coil 2C	protein-coding	6,27	6,9	-1,54	4,46E-08	3,90E-06
SREK1IP1	SREK1 interacting protein 1	protein-coding	4,04	4,66	-1,54	6,63E-06	0,0002
LUC7L3	LUC7 like 3 pre-mRNA splicing factor	protein-coding	5,74	6,36	-1,54	3,32E-06	9,99E-05
ZFYVE9	zinc finger FYVE-type containing 9	protein-coding	5,01	5,64	-1,54	2,46E-08	2,59E-06
FAP	fibroblast activation protein alpha	protein-coding	7,25	7,88	-1,54	0,0009	0,0078
HPX	hemopexin	protein-coding	0,29	0,91	-1,54	2,02E-05	0,0004
CCDC88A	coiled-coil domain containing 88A	protein-coding	3,7	4,33	-1,54	0,0004	0,0038
RAD54L2	RAD54 like 2	protein-coding	3,08	3,7	-1,54	6,26E-09	9,24E-07
LPP	LIM domain containing preferred translocation partner in lipoma	protein-coding	5,05	5,67	-1,54	4,94E-05	0,0008
TPP2	tripeptidyl peptidase 2	protein-coding	5,88	6,51	-1,54	2,93E-07	1,53E-05
PHKA2	phosphorylase kinase regulatory subunit alpha 2	protein-coding	2,86	3,48	-1,54	1,04E-06	3,94E-05
C1GALT1C1	C1GALT1 specific chaperone 1	protein-coding	5,27	5,89	-1,54	9,75E-05	0,0014
RASAL2	RAS protein activator like 2	protein-coding	4,79	5,41	-1,54	9,13E-07	3,59E-05
PHF10	PHD finger protein 10	protein-coding	5,65	6,27	-1,54	0,0011	0,0089
LINC00515	long intergenic non-protein coding RNA 515	ncRNA	0,91	1,53	-1,54	4,10E-05	0,0007
KIAA1549L	KIAA1549 like	protein-coding	3,85	4,48	-1,54	0,0007	0,0063
CAPNS2	calpain small subunit 2	protein-coding	0,07	0,69	-1,54	3,24E-07	1,66E-05
TMEM131L	transmembrane 131 like	protein-coding	3,99	4,61	-1,54	1,22E-05	0,0003
TTC7A	tetratricopeptide repeat domain 7A	protein-coding	4,66	5,28	-1,54	2,77E-07	1,47E-05
RAPGEF4	Rap guanine nucleotide exchange factor 4	protein-coding	0,97	1,59	-1,54	8,65E-05	0,0013
PDCD6P1	PDCD6 pseudogene 1	pseudo	2,68	3,3	-1,54	0,0002	0,0023
PNN	pinin, desmosome associated protein	protein-coding	5,65	6,27	-1,54	4,73E-06	0,0001
PDXDC2P	pyridoxal dependent decarboxylase domain containing 2, pseudogene	pseudo	4,42	5,04	-1,54	6,75E-05	0,0010
MAPK8IP3	mitogen-activated protein kinase 8 interacting protein 3	protein-coding	4,61	5,23	-1,54	2,91E-07	1,52E-05
HSP90AA1	heat shock protein 90 alpha family class A member 1	protein-coding	7,77	8,39	-1,54	0,0006	0,0057
CD164	CD164 molecule	protein-coding	8,07	8,69	-1,54	1,65E-06	5,84E-05
RPS15AP10	ribosomal protein S15a pseudogene 10	pseudo	1,23	1,85	-1,54	0,0001	0,0017
GPATCH2	G-patch domain containing 2	protein-coding	3,62	4,24	-1,54	8,75E-07	3,46E-05
HERC2P2	HERC2 pseudogene 2	pseudo	4,39	5,01	-1,54	0,0003	0,0032
CCDC43	coiled-coil domain containing 43	protein-coding	3,89	4,51	-1,54	2,80E-08	2,77E-06
SLC38A6	solute carrier family 38 member 6	protein-coding	4,31	4,93	-1,53	1,65E-05	0,0004
SMG1	SMG1 nonsense mediated mRNA decay associated PI3K related kinase	protein-coding	5,38	6	-1,53	2,58E-07	1,41E-05
CHMP2B	charged multivesicular body protein 2B	protein-coding	5,87	6,49	-1,53	0,0001	0,0018
ZBTB11	zinc finger and BTB domain containing 11	protein-coding	4,16	4,77	-1,53	6,66E-07	2,84E-05
KAT2B	lysine acetyltransferase 2B	protein-coding	2,64	3,26	-1,53	0,0002	0,0023
GNB4	G protein subunit beta 4	protein-coding	4,1	4,72	-1,53	2,78E-06	8,70E-05
SRRM2	serine/arginine repetitive matrix 2	protein-coding	8,71	9,32	-1,53	1,59E-07	1,01E-05
HEATR5B	HEAT repeat containing 5B	protein-coding	3,71	4,33	-1,53	2,49E-07	1,38E-05
CRY2	cryptochrome circadian regulator 2	protein-coding	5,72	6,34	-1,53	2,53E-05	0,0005
ROCK1P1	Rho associated coiled-coil containing protein kinase 1 pseudogene 1	pseudo	0,52	1,13	-1,53	4,92E-05	0,0008
DOP1A	DOP1 leucine zipper like protein A	protein-coding	4,24	4,85	-1,53	2,75E-06	8,63E-05
PPIP5K1	diphosphoinositol pentakisphosphate kinase 1	protein-coding	3,61	4,22	-1,53	9,67E-07	3,77E-05
NAV2-AS6	NAV2 antisense RNA 6	ncRNA	0,74	1,36	-1,53	0,0004	0,0042
MIR3936HG	MIR3936 host gene	ncRNA	0,55	1,16	-1,53	0,0002	0,0026
ZNF43	zinc finger protein 43	protein-coding	2,79	3,4	-1,53	1,66E-06	5,84E-05
RSF1	remodeling and spacing factor 1	protein-coding	4,03	4,64	-1,53	0,0001	0,0015
MED19	mediator complex subunit 19	protein-coding	4,64	5,25	-1,53	8,41E-06	0,0002
PMS1	PMS1 homolog 1, mismatch repair system component	protein-coding	2,34	2,96	-1,53	0,0002	0,0023
PCNAP1	proliferating cell nuclear antigen pseudogene 1	pseudo	-0,06	0,56	-1,53	5,47E-06	0,0002
BTBD8	BTB domain containing 8	protein-coding	1,8	2,41	-1,53	7,63E-05	0,0011
ZBTB1	zinc finger and BTB domain containing 1	protein-coding	5,52	6,13	-1,53	3,16E-05	0,0006
WDSUB1	WD repeat, sterile alpha motif and U-box domain containing 1	protein-coding	3,18	3,8	-1,53	5,41E-05	0,0009
SLC30A7	solute carrier family 30 member 7	protein-coding	4,95	5,56	-1,53	1,09E-09	2,84E-07
SGTB	small glutamine rich tetratricopeptide repeat co-chaperone beta	protein-coding	4,42	5,03	-1,53	0,0004	0,0039
GAPVD1	GTPase activating protein and VPS9 domains 1	protein-coding	5,22	5,83	-1,53	1,27E-07	8,54E-06
ALDH1L2	aldehyde dehydrogenase 1 family member L2	protein-coding	6,72	7,33	-1,53	0,0003	0,0036
RER1	retention in endoplasmic reticulum sorting receptor 1	protein-coding	5,07	5,68	-1,53	1,62E-05	0,0003
OXCT1	3-oxoacid CoA-transferase 1	protein-coding	3,21	3,82	-1,53	0,0003	0,0029
SENP7	SUMO specific peptidase 7	protein-coding	3,17	3,78	-1,53	0,0002	0,0027
FBXO8	F-box protein 8	protein-coding	4,43	5,05	-1,53	2,60E-05	0,0005
UBR5	ubiquitin protein ligase E3 component n-recognin 5	protein-coding	4,83	5,44	-1,53	3,44E-09	6,13E-07
ZNF69	zinc finger protein 69	protein-coding	0,98	1,59	-1,53	0,0001	0,0018
MXRA7	matrix remodeling associated 7	protein-coding	4,89	5,5	-1,53	0,0003	0,0030
ACADSB	acyl-CoA dehydrogenase short/branched chain	protein-coding	3,05	3,66	-1,53	3,25E-05	0,0006
MARCHF7	membrane associated ring-CH-type finger 7	protein-coding	5,16	5,77	-1,53	4,72E-06	0,0001
ZNF37BP	zinc finger protein 37B, pseudogene	pseudo	2,25	2,87	-1,53	4,43E-05	0,0008
TYRO3P	TYRO3P protein tyrosine kinase pseudogene	pseudo	0,7	1,31	-1,53	2,15E-05	0,0004
CLCC1	chloride channel CLIC like 1	protein-coding	5,08	5,69	-1,53	3,30E-07	1,69E-05
PMP22	peripheral myelin protein 22	protein-coding	6,3	6,91	-1,53	0,0002	0,0020
TET1	tet methylcytosine dioxygenase 1	protein-coding	2,03	2,64	-1,52	0,0006	0,0056
UBXN2B	UBX domain protein 2B	protein-coding	3,01	3,61	-1,52	7,95E-06	0,0002
MRE11	MRE11 homolog, double strand break repair nuclease	protein-coding	3,76	4,37	-1,52	3,14E-05	0,0006
SNAPC3	small nuclear RNA activating complex polypeptide 3	protein-coding	5,55	6,16	-1,52	0,0001	0,0017
PTPRA	protein tyrosine phosphatase receptor type A	protein-coding	5,59	6,19	-1,52	5,87E-05	0,0009
ZNF606	zinc finger protein 606	protein-coding	1,56	2,17	-1,52	0,0001	0,0015
ATF6	activating transcription factor 6	protein-coding	5,28	5,89	-1,52	8,23E-06	0,0002
BCLAF1	BCL2 associated transcription factor 1	protein-coding	5,8	6,41	-1,52	3,55E-05	0,0006
AP1G1	adaptor related protein complex 1 subunit gamma 1	protein-coding	6	6,61	-1,52	9,18E-11	4,34E-08
PCDHGB8P	protocadherin gamma subfamily B, 8 pseudogene	pseudo	1,87	2,47	-1,52	0,0003	0,0029
ASH1L	ASH1 like histone lysine methyltransferase	protein-coding	4,97	5,57	-1,52	1,20E-05	0,0003
TSPYL6	TSPY like 6	protein-coding	0,16	0,77	-1,52	2,66E-06	8,42E-05
LDAF1	lipid droplet assembly factor 1	protein-coding	4,1	4,71	-1,52	0,0002	0,0027
ZNF404	zinc finger protein 404	protein-coding	2,05	2,65	-1,52	0,0008	0,0069
DLEU2L	deleted in lymphocytic leukemia 2 like	ncRNA	0,64	1,24	-1,52	6,56E-06	0,0002
METTL21A	methyltransferase 21A, HSPA lysine	protein-coding	3,05	3,65	-1,52	2,68E-05	0,0005
N4BP2	NEDD4 binding protein 2	protein-coding	2,31	2,91	-1,52	9,12E-05	0,0013
ANKRD20A9P	ankyrin repeat domain 20 family member A9, pseudogene	pseudo	2,76	3,37	-1,52	0,0001	0,0018
RBAK	RB associated KRAB zinc finger	protein-coding	3,51	4,12	-1,52	1,19E-07	8,12E-06
TRANK1	tetratricopeptide repeat and ankyrin repeat containing 1	protein-coding	3,93	4,53	-1,52	0,0006	0,0056
YWHAQ	tyrosine 3-monooxygenase/tryptophan 5-monooxygenase activation protein theta	protein-coding	8,12	8,72	-1,52	0,0002	0,0028
GPATCH4	G-patch domain containing 4	protein-coding	2,85	3,45	-1,52	8,46E-06	0,0002
CPD	carboxypeptidase D	protein-coding	6,27	6,87	-1,52	9,18E-05	0,0013
OTUD3	OTU deubiquitinase 3	protein-coding	1,79	2,4	-1,52	1,15E-05	0,0003
USP47	ubiquitin specific peptidase 47	protein-coding	5,88	6,49	-1,52	1,10E-06	4,14E-05
POM121	POM121 transmembrane nucleoporin	protein-coding	5,11	5,71	-1,52	8,22E-06	0,0002
LMNTD2	lamin tail domain containing 2	protein-coding	0,47	1,07	-1,52	7,61E-05	0,0011
RBM5	RNA binding motif protein 5	protein-coding	5,31	5,91	-1,52	6,46E-06	0,0002
PAIP1	poly(A) binding protein interacting protein 1	protein-coding	6,21	6,81	-1,52	1,69E-05	0,0004
CHORDC1	cysteine and histidine rich domain containing 1	protein-coding	4,07	4,67	-1,52	0,0002	0,0024
SEPTIN7	septin 7	protein-coding	7,47	8,07	-1,52	0,0001	0,0019
ZNF451	zinc finger protein 451	protein-coding	3,43	4,03	-1,52	2,04E-05	0,0004
POLG2	DNA polymerase gamma 2, accessory subunit	protein-coding	2,14	2,74	-1,52	0,0001	0,0019
CERCAM	cerebral endothelial cell adhesion molecule	protein-coding	6,42	7,01	-1,52	0,0012	0,0097
CASP8AP2	caspase 8 associated protein 2	protein-coding	2,58	3,18	-1,51	0,0002	0,0023
TBC1D23	TBC1 domain family member 23	protein-coding	5,85	6,44	-1,51	1,90E-07	1,14E-05
HIF1A	hypoxia inducible factor 1 subunit alpha	protein-coding	8,39	8,99	-1,51	1,10E-06	4,14E-05
TBC1D8B	TBC1 domain family member 8B	protein-coding	2,69	3,28	-1,51	0,0003	0,0031
ZNF615	zinc finger protein 615	protein-coding	2,26	2,86	-1,51	0,0007	0,0062
CCDC18	coiled-coil domain containing 18	protein-coding	1,4	2	-1,51	2,39E-05	0,0005
FEZ2	fasciculation and elongation protein zeta 2	protein-coding	6,18	6,78	-1,51	0,0004	0,0043
RBM26	RNA binding motif protein 26	protein-coding	3,64	4,23	-1,51	6,83E-06	0,0002
STAG1	stromal antigen 1	protein-coding	5,42	6,02	-1,51	2,33E-07	1,31E-05
PSIP1	PC4 and SFRS1 interacting protein 1	protein-coding	4	4,6	-1,51	5,40E-05	0,0009
EDRF1	erythroid differentiation regulatory factor 1	protein-coding	2,68	3,27	-1,51	4,95E-05	0,0008
MYO6	myosin VI	protein-coding	4,38	4,98	-1,51	7,49E-06	0,0002
DNAJC25	DnaJ heat shock protein family (Hsp40) member C25	protein-coding	3,32	3,92	-1,51	1,10E-05	0,0003
RFC1	replication factor C subunit 1	protein-coding	5,21	5,81	-1,51	5,92E-06	0,0002
NIPBL	NIPBL cohesin loading factor	protein-coding	5,92	6,51	-1,51	7,16E-06	0,0002
PTCH1	patched 1	protein-coding	2,82	3,41	-1,51	0,0008	0,0067
NBPF14	NBPF member 14	protein-coding	4,51	5,11	-1,51	1,22E-05	0,0003
GK5	glycerol kinase 5	protein-coding	2,5	3,09	-1,51	2,02E-06	6,70E-05
ZNF502	zinc finger protein 502	protein-coding	1,4	2	-1,51	2,17E-05	0,0004
POLR2M	RNA polymerase II subunit M	protein-coding	5,29	5,88	-1,51	2,73E-08	2,73E-06
SLC38A2	solute carrier family 38 member 2	protein-coding	9,28	9,88	-1,51	0,0002	0,0028
ARGLU1	arginine and glutamate rich 1	protein-coding	4,75	5,35	-1,51	1,52E-08	1,80E-06
ALG5	ALG5 dolichyl-phosphate beta-glucosyltransferase	protein-coding	5,02	5,62	-1,51	1,31E-06	4,75E-05
TOP2B	DNA topoisomerase II beta	protein-coding	5,72	6,31	-1,51	2,56E-05	0,0005
TOMM7	translocase of outer mitochondrial membrane 7	protein-coding	7,96	8,55	-1,51	2,38E-06	7,64E-05
ARID4A	AT-rich interaction domain 4A	protein-coding	4,93	5,52	-1,51	4,13E-07	1,98E-05
ASH2L	ASH2 like, histone lysine methyltransferase complex subunit	protein-coding	4,41	5	-1,51	1,71E-06	5,94E-05
PTPN21	protein tyrosine phosphatase non-receptor type 21	protein-coding	3,3	3,89	-1,51	0,0001	0,0016
ATP2B1	ATPase plasma membrane Ca2+ transporting 1	protein-coding	5,2	5,79	-1,51	0,0012	0,0099
GMCL1	germ cell-less 1, spermatogenesis associated	protein-coding	3,84	4,43	-1,51	4,32E-07	2,05E-05
VTA1	vesicle trafficking 1	protein-coding	3,95	4,55	-1,51	5,34E-06	0,0001
ULK4	unc-51 like kinase 4	protein-coding	2,37	2,97	-1,51	2,28E-06	7,40E-05
SMARCC2	SWI/SNF related, matrix associated, actin dependent regulator of chromatin subfamily c member 2	protein-coding	7,28	7,87	-1,51	7,68E-06	0,0002
CARF	calcium responsive transcription factor	protein-coding	1,91	2,5	-1,51	4,17E-05	0,0007
TRIT1	tRNA isopentenyltransferase 1	protein-coding	3,42	4,01	-1,51	9,06E-05	0,0013
NBPF9	NBPF member 9	protein-coding	3,9	4,49	-1,51	0,0006	0,0054
SNORA55	small nucleolar RNA, H/ACA box 55	snoRNA	2,87	3,46	-1,51	2,32E-05	0,0005
BICD1	BICD cargo adaptor 1	protein-coding	0,85	1,44	-1,51	4,12E-05	0,0007
STK39	serine/threonine kinase 39	protein-coding	4,96	5,56	-1,51	0,0001	0,0016
STARD4	StAR related lipid transfer domain containing 4	protein-coding	4,06	4,65	-1,51	0,0007	0,0066
RPE	ribulose-5-phosphate-3-epimerase	protein-coding	6,09	6,68	-1,51	1,31E-05	0,0003
IDI1	isopentenyl-diphosphate delta isomerase 1	protein-coding	4,91	5,5	-1,51	4,27E-05	0,0007
FKSG29	FKSG29	ncRNA	0,72	1,31	-1,51	6,41E-05	0,0010
EPB41L1	erythrocyte membrane protein band 4.1 like 1	protein-coding	5,38	5,98	-1,51	0,0001	0,0017
DOT1L	DOT1 like histone lysine methyltransferase	protein-coding	4,36	4,95	-1,51	8,87E-07	3,50E-05
ZMAT2	zinc finger matrin-type 2	protein-coding	6,42	7,01	-1,51	7,29E-05	0,0011
PGGHG	protein-glucosylgalactosylhydroxylysine glucosidase	protein-coding	3,87	4,46	-1,5	0,0001	0,0019
PPP3CA	protein phosphatase 3 catalytic subunit alpha	protein-coding	4,43	5,02	-1,5	7,33E-05	0,0011
RNF32	ring finger protein 32	protein-coding	0,97	1,56	-1,5	5,53E-05	0,0009
B4GALT4	beta-1,4-galactosyltransferase 4	protein-coding	5,75	6,34	-1,5	0,0002	0,0026
WDR55	WD repeat domain 55	protein-coding	4,58	5,17	-1,5	3,27E-08	3,14E-06
ZNF439	zinc finger protein 439	protein-coding	1,01	1,6	-1,5	0,0002	0,0028
C5orf15	chromosome 5 open reading frame 15	protein-coding	5,99	6,57	-1,5	2,81E-06	8,75E-05
TMEM178A	transmembrane protein 178A	protein-coding	0,79	1,37	-1,5	0,0005	0,0049
PRCP	prolylcarboxypeptidase	protein-coding	6,1	6,69	-1,5	0,0001	0,0017
DR1	down-regulator of transcription 1	protein-coding	5,53	6,12	-1,5	6,19E-06	0,0002
CCNG2	cyclin G2	protein-coding	4,77	5,35	-1,5	0,0006	0,0058
UMAD1	UBAP1-MVB12-associated (UMA) domain containing 1	protein-coding	3,3	3,89	-1,5	7,13E-07	3,00E-05
DZIP3	DAZ interacting zinc finger protein 3	protein-coding	3,67	4,26	-1,5	0,0006	0,0059
TNFRSF1A	TNF receptor superfamily member 1A	protein-coding	7,05	7,64	-1,5	0,0009	0,0080
AMH	anti-Mullerian hormone	protein-coding	0,23	0,82	-1,5	3,35E-05	0,0006
PITHD1	PITH domain containing 1	protein-coding	3,78	4,36	-1,5	1,47E-05	0,0003
INTS6	integrator complex subunit 6	protein-coding	3,16	3,75	-1,5	0,0005	0,0052
MIA3	MIA SH3 domain ER export factor 3	protein-coding	5,15	5,73	-1,5	1,60E-05	0,0003
COPB2	COPI coat complex subunit beta 2	protein-coding	6,8	7,38	-1,5	4,81E-05	0,0008
PPIF	peptidylprolyl isomerase F	protein-coding	6,13	5,53	1,51	1,02E-05	0,0002
SH3BP1	SH3 domain binding protein 1	protein-coding	3,56	2,96	1,51	0,0012	0,0094
GLIPR2	GLI pathogenesis related 2	protein-coding	6,02	5,42	1,52	1,29E-05	0,0003
H4C11	H4 clustered histone 11	protein-coding	2,54	1,93	1,53	0,0002	0,0026
COL6A2	collagen type VI alpha 2 chain	protein-coding	11,96	11,33	1,54	6,47E-07	2,83E-05
CCDC7	coiled-coil domain containing 7	protein-coding	4,72	4,09	1,54	2,37E-05	0,0005
ADAMDEC1	ADAM like decysin 1	protein-coding	0,4	-0,23	1,54	9,14E-06	0,0002
GPT2	glutamic--pyruvic transaminase 2	protein-coding	4,26	3,61	1,56	0,0006	0,0055
NUAK2	NUAK family kinase 2	protein-coding	3,8	3,16	1,56	0,0004	0,0038
IL1RN	interleukin 1 receptor antagonist	protein-coding	0,7	0,06	1,56	0,0010	0,0086
BASP1	brain abundant membrane attached signal protein 1	protein-coding	4,68	4,03	1,57	0,0003	0,0036
IL4I1	interleukin 4 induced 1	protein-coding	0,73	0,08	1,57	0,0002	0,0027
TMEM132A	transmembrane protein 132A	protein-coding	5,17	4,5	1,59	0,0005	0,0052
GTPBP2	GTP binding protein 2	protein-coding	6,65	5,98	1,59	1,29E-05	0,0003
NPAS2	neuronal PAS domain protein 2	protein-coding	6,32	5,64	1,6	0,0001	0,0016
RAMP2	receptor activity modifying protein 2	protein-coding	1,8	1,11	1,61	0,0002	0,0028
CIB2	calcium and integrin binding family member 2	protein-coding	2,76	2,06	1,61	0,0004	0,0042
NBPF15	NBPF member 15	protein-coding	0,59	-0,11	1,62	8,14E-05	0,0012
CCL7	C-C motif chemokine ligand 7	protein-coding	1,33	0,63	1,62	0,0011	0,0088
NQO1	NAD(P)H quinone dehydrogenase 1	protein-coding	7,57	6,87	1,62	5,87E-05	0,0009
SV2A	synaptic vesicle glycoprotein 2A	protein-coding	4,19	3,49	1,63	0,0002	0,0025
UBALD2	UBA like domain containing 2	protein-coding	6,42	5,72	1,63	1,82E-08	2,05E-06
CPNE2	copine 2	protein-coding	4,89	4,18	1,63	1,67E-06	5,84E-05
PCDHAC2	protocadherin alpha subfamily C, 2	protein-coding	1,25	0,54	1,64	0,0008	0,0072
SLC22A4	solute carrier family 22 member 4	protein-coding	2,95	2,23	1,65	5,72E-05	0,0009
H2AC21	H2A clustered histone 21	protein-coding	4,57	3,84	1,67	0,0001	0,0018
CCL8	C-C motif chemokine ligand 8	protein-coding	0,54	-0,2	1,67	1,73E-06	5,98E-05
PCDHGA11	protocadherin gamma subfamily A, 11	protein-coding	4,16	3,42	1,67	6,22E-06	0,0002
ARG2	arginase 2	protein-coding	2,79	2,05	1,68	0,0003	0,0031
TRIM16	tripartite motif containing 16	protein-coding	5,29	4,54	1,68	5,87E-06	0,0002
KCNE3	potassium voltage-gated channel subfamily E regulatory subunit 3	protein-coding	1,7	0,95	1,69	0,0002	0,0026
LCTL	lactase like	protein-coding	1,31	0,55	1,69	0,0004	0,0037
CYYR1	cysteine and tyrosine rich 1	protein-coding	0,87	0,11	1,69	0,0007	0,0066
ADORA1	adenosine A1 receptor	protein-coding	1,48	0,71	1,7	1,45E-05	0,0003
POU2F2-AS1	POU2F2 antisense RNA 1	ncRNA	1,42	0,65	1,7	0,0001	0,0019
VDR	vitamin D receptor	protein-coding	6,64	5,84	1,74	2,13E-06	6,98E-05
STAC	SH3 and cysteine rich domain	protein-coding	4,9	4,1	1,74	6,45E-05	0,0010
GMFG	glia maturation factor gamma	protein-coding	1,02	0,21	1,76	0,0010	0,0081
H2BC4	H2B clustered histone 4	protein-coding	5,2	4,38	1,76	0,0011	0,0091
CD163	CD163 molecule	protein-coding	1,41	0,59	1,76	0,0002	0,0023
TNFRSF21	TNF receptor superfamily member 21	protein-coding	5,51	4,69	1,78	0,0009	0,0077
KCNG1	potassium voltage-gated channel modifier subfamily G member 1	protein-coding	3,92	3,08	1,78	9,82E-05	0,0014
ARHGEF19	Rho guanine nucleotide exchange factor 19	protein-coding	4,62	3,78	1,78	0,0001	0,0018
BARD1	BRCA1 associated RING domain 1	protein-coding	4,13	3,29	1,79	2,99E-07	1,55E-05
MAGED4B	MAGE family member D4B	protein-coding	4,32	3,48	1,79	1,34E-09	3,26E-07
TRIB3	tribbles pseudokinase 3	protein-coding	8,07	7,22	1,8	0,0002	0,0027
H3C11	H3 clustered histone 11	protein-coding	6,46	5,6	1,81	9,62E-05	0,0014
DGAT2	diacylglycerol O-acyltransferase 2	protein-coding	2,58	1,72	1,82	0,0004	0,0045
IGSF3	immunoglobulin superfamily member 3	protein-coding	1,66	0,79	1,83	0,0012	0,0098
C1QTNF1	C1q and TNF related 1	protein-coding	3,61	2,74	1,83	0,0001	0,0014
TUBA4A	tubulin alpha 4a	protein-coding	2,68	1,79	1,85	0,0001	0,0016
CD82	CD82 molecule	protein-coding	3,5	2,59	1,89	0,0003	0,0031
LOXL3	lysyl oxidase like 3	protein-coding	6,03	5,09	1,92	7,28E-05	0,0011
TNC	tenascin C	protein-coding	10,7	9,75	1,93	0,0002	0,0023
PNKD	PNKD metallo-beta-lactamase domain containing	protein-coding	3,09	2,1	1,98	0,0002	0,0028
PRDM1	PR/SET domain 1	protein-coding	4,49	3,45	2,06	0,0002	0,0021
H2AC17	H2A clustered histone 17	protein-coding	4,81	3,75	2,08	0,0002	0,0027
NETO2	neuropilin and tolloid like 2	protein-coding	4,06	2,98	2,11	0,0002	0,0025
H2AC13	H2A clustered histone 13	protein-coding	4,1	3,02	2,12	0,0010	0,0082
CCL2	C-C motif chemokine ligand 2	protein-coding	7,12	6,01	2,16	0,0011	0,0091
WASHC1	WASH complex subunit 1	protein-coding	2,51	1,38	2,19	5,84E-06	0,0002
LAMC3	laminin subunit gamma 3	protein-coding	1,19	0,05	2,2	3,01E-09	5,80E-07
ARSI	arylsulfatase family member I	protein-coding	3,14	2	2,2	2,92E-07	1,52E-05
PHACTR1	phosphatase and actin regulator 1	protein-coding	2,15	1	2,23	0,0005	0,0050
POU2F2	POU class 2 homeobox 2	protein-coding	2,79	1,59	2,3	9,79E-06	0,0002
KCNJ15	potassium inwardly rectifying channel subfamily J member 15	protein-coding	3,27	2	2,41	3,49E-06	0,0001
GNAO1	G protein subunit alpha o1	protein-coding	1,52	0,13	2,62	1,86E-10	6,91E-08
SLC1A3	solute carrier family 1 member 3	protein-coding	4,62	3,16	2,76	0,0009	0,0080
TSPAN18	tetraspanin 18	protein-coding	5,38	3,91	2,77	6,23E-05	0,0010
MAP7	microtubule associated protein 7	protein-coding	3,92	2,41	2,83	6,03E-07	2,70E-05
RBP1	retinol binding protein 1	protein-coding	2,18	0,66	2,88	2,02E-06	6,70E-05
LINC00623	long intergenic non-protein coding RNA 623	ncRNA	2,52	0,94	2,99	1,71E-06	5,94E-05
INHBE	inhibin subunit beta E	protein-coding	3,25	1,65	3,02	2,00E-06	6,68E-05
TMEM176B	transmembrane protein 176B	protein-coding	1,75	0,1	3,15	0,0001	0,0015
CXCL3	C-X-C motif chemokine ligand 3	protein-coding	2,77	1,02	3,36	0,0001	0,0015
RIPOR3	RIPOR family member 3	protein-coding	2,9	1,06	3,57	0,0005	0,0049
CXCL5	C-X-C motif chemokine ligand 5	protein-coding	1,97	0,08	3,72	8,26E-05	0,0012
MMP3	matrix metallopeptidase 3	protein-coding	4,44	2,43	4,03	0,0012	0,0099
CXCL1	C-X-C motif chemokine ligand 1	protein-coding	4,8	2,79	4,04	0,0008	0,0067
IFI27	interferon alpha inducible protein 27	protein-coding	4,25	1,93	5,02	4,05E-05	0,0007
CES1	carboxylesterase 1	protein-coding	3,41	0,98	5,39	7,44E-07	3,10E-05
MMP1	matrix metallopeptidase 1	protein-coding	4,69	1,92	6,81	9,00E-08	6,50E-06
CXCL6	C-X-C motif chemokine ligand 6	protein-coding	5,24	2,06	9,07	2,44E-05	0,0005

## Sheet: 590 common DEGs
590 common DEGs among hEDS and HSD myofibroblasts
Gene Symbol	GENENAME	GENETYPE	Fold Change_hEDS vs control	uncorrected p-value ≤0.01	FDR-adjusted p-value ≤0.01	Fold Change_HSD vs control	uncorrected p-value ≤0.01	FDR-adjusted p-value ≤0.01
CXCL6	C-X-C motif chemokine ligand 6	protein-coding	15.04	1.49e-07	1.9e-05	9.07	2.44e-05	0.0005
MMP1	matrix metallopeptidase 1	protein-coding	9.59	2.59e-11	3.84e-08	6.81	9e-08	6.5e-06
CES1	carboxylesterase 1	protein-coding	7.15	6.67e-10	3.86e-07	5.39	7.44e-07	3.1e-05
IFI27	interferon alpha inducible protein 27	protein-coding	4.05	4.91e-05	0.0013	5.02	4.05e-05	0.0007
CXCL1	C-X-C motif chemokine ligand 1	protein-coding	5.48	1.16e-05	0.0004	4.04	0.0008	0.0067
MMP3	matrix metallopeptidase 3	protein-coding	6.03	2.17e-05	0.0007	4.03	0.0012	0.0099
CXCL5	C-X-C motif chemokine ligand 5	protein-coding	6.37	2.72e-07	2.85e-05	3.72	8.26e-05	0.0012
RIPOR3	RIPOR family member 3	protein-coding	3.68	8.54e-05	0.002	3.57	0.0005	0.0049
CXCL3	C-X-C motif chemokine ligand 3	protein-coding	5	5.23e-07	4.73e-05	3.36	0.0001	0.0015
TMEM176B	transmembrane protein 176B	protein-coding	3.67	7.23e-07	6.02e-05	3.15	0.0001	0.0015
INHBE	inhibin subunit beta E	protein-coding	2.77	1.31e-05	0.0005	3.02	2e-06	6.68e-05
LINC00623	long intergenic non-protein coding RNA 623	ncRNA	2.54	6.12e-07	5.36e-05	2.99	1.71e-06	5.94e-05
RBP1	retinol binding protein 1	protein-coding	2.77	3.97e-06	0.0002	2.88	2.02e-06	6.7e-05
MAP7	microtubule associated protein 7	protein-coding	3.04	1.39e-07	1.81e-05	2.83	6.03e-07	2.7e-05
TSPAN18	tetraspanin 18	protein-coding	2.59	4.2e-05	0.0012	2.77	6.23e-05	0.001
SLC1A3	solute carrier family 1 member 3	protein-coding	2.78	0.0002	0.0041	2.76	0.0009	0.008
GNAO1	G protein subunit alpha o1	protein-coding	2.68	3.76e-11	4.89e-08	2.62	1.86e-10	6.91e-08
KCNJ15	potassium inwardly rectifying channel subfamily J member 15	protein-coding	2.61	3.08e-08	6.42e-06	2.41	3.49e-06	0.0001
POU2F2	POU class 2 homeobox 2	protein-coding	2.21	5.54e-06	0.0003	2.3	9.79e-06	0.0002
PHACTR1	phosphatase and actin regulator 1	protein-coding	2.53	4.21e-06	0.0002	2.23	0.0005	0.005
ARSI	arylsulfatase family member I	protein-coding	2.16	1.91e-07	2.21e-05	2.2	2.92e-07	1.52e-05
LAMC3	laminin subunit gamma 3	protein-coding	2.06	2.99e-09	1.25e-06	2.2	3.01e-09	5.8e-07
WASHC1	WASH complex subunit 1	protein-coding	2.16	4.52e-06	0.0002	2.19	5.84e-06	0.0002
CCL2	C-C motif chemokine ligand 2	protein-coding	2.52	4.35e-05	0.0012	2.16	0.0011	0.0091
H2AC13	H2A clustered histone 13	protein-coding	2.06	0.0007	0.0085	2.12	0.001	0.0082
NETO2	neuropilin and tolloid like 2	protein-coding	1.85	0.0003	0.0044	2.11	0.0002	0.0025
H2AC17	H2A clustered histone 17	protein-coding	1.96	6.2e-05	0.0016	2.08	0.0002	0.0027
PRDM1	PR/SET domain 1	protein-coding	2.44	1.11e-05	0.0004	2.06	0.0002	0.0021
PNKD	PNKD metallo-beta-lactamase domain containing	protein-coding	1.95	7.67e-05	0.0018	1.98	0.0002	0.0028
TNC	tenascin C	protein-coding	2.09	2.64e-06	0.0002	1.93	0.0002	0.0023
CD82	CD82 molecule	protein-coding	2.01	2.58e-05	0.0008	1.89	0.0003	0.0031
TUBA4A	tubulin alpha 4a	protein-coding	1.84	9.46e-05	0.0021	1.85	0.0001	0.0016
C1QTNF1	C1q and TNF related 1	protein-coding	2.02	4.1e-06	0.0002	1.83	0.0001	0.0014
DGAT2	diacylglycerol O-acyltransferase 2	protein-coding	2.27	5.59e-06	0.0003	1.82	0.0004	0.0045
H3C11	H3 clustered histone 11	protein-coding	1.8	6.89e-05	0.0017	1.81	9.62e-05	0.0014
TRIB3	tribbles pseudokinase 3	protein-coding	1.85	2.75e-05	0.0009	1.8	0.0002	0.0027
BARD1	BRCA1 associated RING domain 1	protein-coding	1.6	6.05e-06	0.0003	1.79	2.99e-07	1.55e-05
MAGED4B	MAGE family member D4B	protein-coding	1.67	5.79e-09	1.82e-06	1.79	1.34e-09	3.26e-07
KCNG1	potassium voltage-gated channel modifier subfamily G member 1	protein-coding	1.58	0.0003	0.0051	1.78	9.82e-05	0.0014
TNFRSF21	TNF receptor superfamily member 21	protein-coding	2.24	0.0001	0.0024	1.78	0.0009	0.0077
CD163	CD163 molecule	protein-coding	2.53	4.01e-08	7.73e-06	1.76	0.0002	0.0023
GMFG	glia maturation factor gamma	protein-coding	1.91	0.0004	0.0054	1.76	0.001	0.0081
H2BC4	H2B clustered histone 4	protein-coding	1.76	9.55e-05	0.0021	1.76	0.0011	0.0091
VDR	vitamin D receptor	protein-coding	1.78	1.06e-07	1.56e-05	1.74	2.13e-06	6.98e-05
ADORA1	adenosine A1 receptor	protein-coding	1.72	1.52e-06	0.0001	1.7	1.45e-05	0.0003
POU2F2-AS1	POU2F2 antisense RNA 1	ncRNA	1.63	8.61e-05	0.002	1.7	0.0001	0.0019
CYYR1	cysteine and tyrosine rich 1	protein-coding	1.92	5.54e-06	0.0003	1.69	0.0007	0.0066
KCNE3	potassium voltage-gated channel subfamily E regulatory subunit 3	protein-coding	2.03	4.18e-07	3.98e-05	1.69	0.0002	0.0026
ARG2	arginase 2	protein-coding	1.62	0.0001	0.0028	1.68	0.0003	0.0031
TRIM16	tripartite motif containing 16	protein-coding	1.87	2.79e-08	6.12e-06	1.68	5.87e-06	0.0002
CCL8	C-C motif chemokine ligand 8	protein-coding	1.94	9.5e-10	4.94e-07	1.67	1.73e-06	5.98e-05
H2AC21	H2A clustered histone 21	protein-coding	1.57	2.87e-05	0.0009	1.67	0.0001	0.0018
PCDHGA11	protocadherin gamma subfamily A, 11	protein-coding	1.8	3.2e-06	0.0002	1.67	6.22e-06	0.0002
SLC22A4	solute carrier family 22 member 4	protein-coding	2	1.53e-07	1.94e-05	1.65	5.72e-05	0.0009
PCDHAC2	protocadherin alpha subfamily C, 2	protein-coding	1.72	0.0003	0.0051	1.64	0.0008	0.0072
UBALD2	UBA like domain containing 2	protein-coding	1.76	1.16e-11	2e-08	1.63	1.82e-08	2.05e-06
SV2A	synaptic vesicle glycoprotein 2A	protein-coding	1.62	0.0001	0.0023	1.63	0.0002	0.0025
CCL7	C-C motif chemokine ligand 7	protein-coding	2.01	6.5e-06	0.0003	1.62	0.0011	0.0088
NBPF15	NBPF member 15	protein-coding	1.62	3.92e-06	0.0002	1.62	8.14e-05	0.0012
NQO1	NAD(P)H quinone dehydrogenase 1	protein-coding	1.78	6.74e-06	0.0003	1.62	5.87e-05	0.0009
RAMP2	receptor activity modifying protein 2	protein-coding	1.54	0.0003	0.0047	1.61	0.0002	0.0028
GTPBP2	GTP binding protein 2	protein-coding	1.66	1.52e-06	0.0001	1.59	1.29e-05	0.0003
TMEM132A	transmembrane protein 132A	protein-coding	1.7	6.92e-05	0.0017	1.59	0.0005	0.0052
BASP1	brain abundant membrane attached signal protein 1	protein-coding	1.67	1.91e-06	0.0001	1.57	0.0003	0.0036
IL4I1	interleukin 4 induced 1	protein-coding	1.83	1.04e-07	1.55e-05	1.57	0.0002	0.0027
IL1RN	interleukin 1 receptor antagonist	protein-coding	1.79	7.03e-06	0.0003	1.56	0.001	0.0086
NUAK2	NUAK family kinase 2	protein-coding	1.63	7.26e-06	0.0003	1.56	0.0004	0.0038
ADAMDEC1	ADAM like decysin 1	protein-coding	1.57	2.75e-07	2.86e-05	1.54	9.14e-06	0.0002
CCDC7	coiled-coil domain containing 7	protein-coding	1.59	1.77e-06	0.0001	1.54	2.37e-05	0.0005
PI16	peptidase inhibitor 16	protein-coding	-9.56	0.0001	0.0025	-7.28	0.0009	0.0074
FOSB	FosB proto-oncogene, AP-1 transcription factor subunit	protein-coding	-6.89	1.02e-10	9.26e-08	-6.84	2.46e-08	2.59e-06
FOS	Fos proto-oncogene, AP-1 transcription factor subunit	protein-coding	-3.94	4.01e-08	7.73e-06	-5.27	2.66e-07	1.44e-05
DEPTOR	DEP domain containing MTOR interacting protein	protein-coding	-3.87	0.0005	0.0068	-4.94	0.0001	0.0015
IGFBP7	insulin like growth factor binding protein 7	protein-coding	-6.5	4.72e-09	1.64e-06	-4.74	2.09e-06	6.85e-05
NEAT1	nuclear paraspeckle assembly transcript 1	ncRNA	-2.99	3.51e-10	2.21e-07	-4.7	2.9e-15	3.02e-11
USP53	ubiquitin specific peptidase 53	protein-coding	-3.11	1.27e-05	0.0005	-4.68	2.2e-07	1.28e-05
KRT19	keratin 19	protein-coding	-3.99	4.89e-06	0.0002	-4.52	8.01e-06	0.0002
NPR3	natriuretic peptide receptor 3	protein-coding	-3.46	4.11e-07	3.94e-05	-4.15	8.66e-07	3.45e-05
FRAS1	Fraser extracellular matrix complex subunit 1	protein-coding	-3.77	1.8e-07	2.15e-05	-4.1	2.84e-07	1.5e-05
GALNT12	polypeptide N-acetylgalactosaminyltransferase 12	protein-coding	-4.04	3.16e-07	3.18e-05	-4.09	2.07e-06	6.82e-05
RDH10	retinol dehydrogenase 10	protein-coding	-3.32	2.05e-05	0.0007	-4.07	4.58e-06	0.0001
OXTR	oxytocin receptor	protein-coding	-3.15	0.0008	0.0097	-3.92	0.0001	0.0016
ABCA9	ATP binding cassette subfamily A member 9	protein-coding	-2.82	1.58e-05	0.0006	-3.91	4.69e-06	0.0001
CACNB4	calcium voltage-gated channel auxiliary subunit beta 4	protein-coding	-4.4	4.72e-07	4.32e-05	-3.69	9.61e-07	3.75e-05
TMEM14EP	transmembrane protein 14E, pseudogene	pseudo	-3.28	1.14e-11	2e-08	-3.65	5.03e-12	5.51e-09
TNXB	tenascin XB	protein-coding	-3.67	2.28e-05	0.0007	-3.61	0.0003	0.0029
PTGIS	prostaglandin I2 synthase	protein-coding	-2.8	0.0004	0.0065	-3.55	4.73e-05	0.0008
NR4A1	nuclear receptor subfamily 4 group A member 1	protein-coding	-3.89	8.9e-08	1.41e-05	-3.51	1.88e-05	0.0004
TNXA	tenascin XA (pseudogene)	pseudo	-3.47	7.12e-07	5.95e-05	-3.41	2.44e-05	0.0005
AKAP12	A-kinase anchoring protein 12	protein-coding	-2.59	3e-06	0.0002	-3.39	1.38e-07	9.1e-06
ARHGAP20	Rho GTPase activating protein 20	protein-coding	-2.71	2.06e-06	0.0001	-3.35	8.36e-07	3.39e-05
NR4A2	nuclear receptor subfamily 4 group A member 2	protein-coding	-3.97	1.04e-08	2.74e-06	-3.33	1.83e-05	0.0004
SULF1	sulfatase 1	protein-coding	-2.84	6.13e-06	0.0003	-3.32	4.75e-06	0.0001
WNT2	Wnt family member 2	protein-coding	-3.04	3.02e-07	3.09e-05	-3.3	7.69e-06	0.0002
SHROOM3	shroom family member 3	protein-coding	-2.97	3.28e-12	8.53e-09	-3.27	1.6e-12	2.57e-09
ROR1	receptor tyrosine kinase like orphan receptor 1	protein-coding	-2.44	5.77e-06	0.0003	-3.24	4.7e-07	2.2e-05
GPRC5A	G protein-coupled receptor class C group 5 member A	protein-coding	-3.79	3.44e-06	0.0002	-3.18	5.56e-05	0.0009
GRAMD2B	GRAM domain containing 2B	protein-coding	-3.01	9.75e-08	1.47e-05	-3.11	2.22e-07	1.28e-05
SIK1	salt inducible kinase 1	protein-coding	-4.46	2.36e-11	3.78e-08	-3.11	7.89e-07	3.26e-05
GOLGA8B	golgin A8 family member B	protein-coding	-2.51	9.48e-11	9.26e-08	-3	3.76e-13	7.83e-10
COMP	cartilage oligomeric matrix protein	protein-coding	-3.46	0.0002	0.0034	-2.99	0.0011	0.0091
ID4	inhibitor of DNA binding 4, HLH protein	protein-coding	-2.75	2e-05	0.0007	-2.95	5.1e-05	0.0008
UTRN	utrophin	protein-coding	-2.25	2.21e-09	9.59e-07	-2.94	2.65e-12	3.45e-09
PLCE1-AS1	PLCE1 antisense RNA 1	ncRNA	-2.84	2.29e-06	0.0001	-2.91	1.21e-06	4.45e-05
MBP	myelin basic protein	protein-coding	-2.6	1.73e-06	0.0001	-2.91	2.37e-06	7.64e-05
ATP10D	ATPase phospholipid transporting 10D (putative)	protein-coding	-2.24	3.92e-10	2.4e-07	-2.89	2.55e-12	3.45e-09
GULP1	GULP PTB domain containing engulfment adaptor 1	protein-coding	-2.16	2.49e-05	0.0008	-2.89	2.87e-06	8.92e-05
DOCK11	dedicator of cytokinesis 11	protein-coding	-2.46	1.12e-10	9.49e-08	-2.84	1.67e-11	1.24e-08
ERCC6	ERCC excision repair 6, chromatin remodeling factor	protein-coding	-2.8	4.36e-12	9.09e-09	-2.84	9.13e-10	2.53e-07
GCNT1	glucosaminyl (N-acetyl) transferase 1	protein-coding	-2.74	3.08e-12	8.53e-09	-2.83	6.68e-11	3.57e-08
PRUNE2	prune homolog 2 with BCH domain	protein-coding	-2.69	4.16e-06	0.0002	-2.83	3.7e-05	0.0007
SGMS2	sphingomyelin synthase 2	protein-coding	-2.56	1.14e-10	9.49e-08	-2.83	1.49e-10	6.09e-08
PTPRQ	protein tyrosine phosphatase receptor type Q	protein-coding	-2.13	1.27e-06	9.15e-05	-2.82	2.44e-08	2.59e-06
CDKN2A	cyclin dependent kinase inhibitor 2A	protein-coding	-2.4	2.68e-05	0.0008	-2.81	0.0001	0.0016
FAM126A	family with sequence similarity 126 member A	protein-coding	-2.41	1.02e-10	9.26e-08	-2.79	1.88e-12	2.8e-09
GOLGB1	golgin B1	protein-coding	-2.34	1.67e-10	1.34e-07	-2.79	2.64e-14	1.37e-10
FMN1	formin 1	protein-coding	-2	7.47e-05	0.0018	-2.76	5.93e-08	4.73e-06
FZD4	frizzled class receptor 4	protein-coding	-2.51	1.2e-07	1.62e-05	-2.73	4.46e-07	2.11e-05
BHLHE40	basic helix-loop-helix family member e40	protein-coding	-2.62	6.78e-11	7.55e-08	-2.72	1.1e-10	4.92e-08
BLID	BH3-like motif containing, cell death inducer	protein-coding	-2.12	3.65e-08	7.31e-06	-2.72	2.16e-11	1.5e-08
LIMCH1	LIM and calponin homology domains 1	protein-coding	-3.13	1.01e-05	0.0004	-2.72	0.0004	0.0041
LRRC37A4P	leucine rich repeat containing 37 member A4, pseudogene	pseudo	-2.03	0.0002	0.0039	-2.72	3.63e-06	0.0001
FAM133CP	family with sequence similarity 133, member A pseudogene	pseudo	-2.33	5.96e-07	5.3e-05	-2.71	1.76e-08	2.01e-06
MYH2	myosin heavy chain 2	protein-coding	-2.99	1.19e-05	0.0005	-2.69	0.0002	0.0025
SEMA3C	semaphorin 3C	protein-coding	-2.27	7.42e-07	6.13e-05	-2.68	2.34e-07	1.31e-05
BMP6	bone morphogenetic protein 6	protein-coding	-3.41	2.71e-08	6e-06	-2.66	7.66e-06	0.0002
KCTD16	potassium channel tetramerization domain containing 16	protein-coding	-2.5	8.2e-05	0.0019	-2.65	0.0005	0.0047
CSF2RB	colony stimulating factor 2 receptor subunit beta	protein-coding	-2.96	1.34e-05	0.0005	-2.64	0.0003	0.0036
NEK7	NIMA related kinase 7	protein-coding	-2.39	5.26e-13	5.47e-09	-2.64	1.64e-14	1.14e-10
THSD4	thrombospondin type 1 domain containing 4	protein-coding	-2.11	0.0003	0.0044	-2.64	2.49e-05	0.0005
HMGN1	high mobility group nucleosome binding domain 1	protein-coding	-2.36	2.44e-07	2.68e-05	-2.61	2.03e-07	1.2e-05
CEMIP	cell migration inducing hyaluronidase 1	protein-coding	-1.92	0.0007	0.0085	-2.61	3.33e-06	9.99e-05
ATP8B1	ATPase phospholipid transporting 8B1	protein-coding	-2.38	3.44e-08	7.01e-06	-2.59	8.44e-09	1.1e-06
COL14A1	collagen type XIV alpha 1 chain	protein-coding	-3.39	3.39e-07	3.39e-05	-2.56	3.9e-05	0.0007
DNAJB4	DnaJ heat shock protein family (Hsp40) member B4	protein-coding	-2	7.08e-05	0.0017	-2.56	8.59e-06	0.0002
ANO4	anoctamin 4	protein-coding	-2.54	7.01e-09	2.06e-06	-2.53	7.02e-07	2.98e-05
UACA	uveal autoantigen with coiled-coil domains and ankyrin repeats	protein-coding	-2.26	1.19e-08	3.03e-06	-2.53	1.92e-09	4.29e-07
VCAN	versican	protein-coding	-2.46	1.19e-07	1.62e-05	-2.53	1.71e-07	1.06e-05
VGLL3	vestigial like family member 3	protein-coding	-2.15	8.04e-07	6.46e-05	-2.48	1.6e-08	1.88e-06
FMN2	formin 2	protein-coding	-2.06	2.56e-07	2.75e-05	-2.46	1.78e-09	4.07e-07
PGBD3	piggyBac transposable element derived 3	protein-coding	-2.23	2.3e-10	1.77e-07	-2.46	1.99e-09	4.35e-07
PKD2	polycystin 2, transient receptor potential cation channel	protein-coding	-2.1	2.63e-10	1.9e-07	-2.46	1.04e-10	4.81e-08
TEK	TEK receptor tyrosine kinase	protein-coding	-2.76	2.63e-05	0.0008	-2.46	0.0002	0.0025
HES1	hes family bHLH transcription factor 1	protein-coding	-2.7	6.3e-11	7.55e-08	-2.45	8.02e-09	1.08e-06
NKTR	natural killer cell triggering receptor	protein-coding	-2.04	3.32e-10	2.2e-07	-2.45	6.91e-14	2.4e-10
NFYB	nuclear transcription factor Y subunit beta	protein-coding	-1.85	3.08e-06	0.0002	-2.44	5.72e-09	8.56e-07
CPA4	carboxypeptidase A4	protein-coding	-2.66	4.39e-05	0.0012	-2.43	0.0003	0.0035
DUSP1	dual specificity phosphatase 1	protein-coding	-2.05	7.28e-06	0.0003	-2.41	8.94e-06	0.0002
LINC00312	long intergenic non-protein coding RNA 312	ncRNA	-2.37	3.04e-06	0.0002	-2.38	2.2e-05	0.0004
F2R	coagulation factor II thrombin receptor	protein-coding	-2.35	6.02e-05	0.0015	-2.36	0.0005	0.0047
ADGRG6	adhesion G protein-coupled receptor G6	protein-coding	-2.14	0.0003	0.0054	-2.36	0.0002	0.0028
KLF4	Kruppel like factor 4	protein-coding	-2.54	5.46e-09	1.75e-06	-2.36	2.24e-07	1.29e-05
LINC00641	long intergenic non-protein coding RNA 641	ncRNA	-1.83	8.15e-10	4.46e-07	-2.36	2.81e-15	3.02e-11
PLK2	polo like kinase 2	protein-coding	-2.18	1.2e-07	1.62e-05	-2.36	3.12e-08	3.05e-06
DST	dystonin	protein-coding	-1.75	4.8e-05	0.0013	-2.33	9.44e-09	1.21e-06
LENG8	leukocyte receptor cluster member 8	protein-coding	-1.91	7.75e-11	8.07e-08	-2.33	8.76e-14	2.6e-10
ABCA5	ATP binding cassette subfamily A member 5	protein-coding	-1.73	0.0002	0.0033	-2.32	1.91e-06	6.45e-05
SNORA70G	small nucleolar RNA, H/ACA box 70G	snoRNA	-2.03	1.31e-05	0.0005	-2.32	6.99e-07	2.98e-05
HAPLN3	hyaluronan and proteoglycan link protein 3	protein-coding	-2.87	1.15e-06	8.44e-05	-2.3	9.78e-05	0.0014
NEXN	nexilin F-actin binding protein	protein-coding	-2.13	1.33e-09	6.77e-07	-2.3	4.23e-10	1.4e-07
TGFBR1	transforming growth factor beta receptor 1	protein-coding	-2.49	3.98e-09	1.4e-06	-2.3	2.34e-08	2.5e-06
EBF1	EBF transcription factor 1	protein-coding	-1.87	3.74e-06	0.0002	-2.29	1.64e-07	1.03e-05
AKAP6	A-kinase anchoring protein 6	protein-coding	-2.1	0.0005	0.0068	-2.27	0.0004	0.0045
MBNL2	muscleblind like splicing regulator 2	protein-coding	-1.7	8.89e-05	0.002	-2.26	2.16e-08	2.37e-06
ARHGAP5	Rho GTPase activating protein 5	protein-coding	-1.79	1.75e-08	4.23e-06	-2.25	2.56e-13	5.92e-10
FAM66D	family with sequence similarity 66 member D	ncRNA	-1.94	7.01e-07	5.91e-05	-2.25	2.73e-09	5.46e-07
OSR1	odd-skipped related transcription factor 1	protein-coding	-1.87	0.0002	0.0033	-2.25	2.79e-06	8.73e-05
BST1	bone marrow stromal cell antigen 1	protein-coding	-2.63	6.38e-06	0.0003	-2.24	0.0001	0.0014
PLAAT3	phospholipase A and acyltransferase 3	protein-coding	-2.3	4.67e-05	0.0013	-2.24	0.0002	0.0024
BCAT1	branched chain amino acid transaminase 1	protein-coding	-1.92	9.34e-06	0.0004	-2.23	2.31e-06	7.5e-05
CLIC4	chloride intracellular channel 4	protein-coding	-2.01	4.18e-08	7.84e-06	-2.23	1.55e-09	3.61e-07
ITPRIP	inositol 1,4,5-trisphosphate receptor interacting protein	protein-coding	-2.15	1.99e-08	4.61e-06	-2.23	5.7e-08	4.58e-06
LIMS2	LIM zinc finger domain containing 2	protein-coding	-3.36	3.04e-09	1.25e-06	-2.22	2.94e-05	0.0006
SLC35E2A	solute carrier family 35 member E2A	pseudo	-2.22	3.23e-05	0.001	-2.22	0.0001	0.0016
FAT1	FAT atypical cadherin 1	protein-coding	-1.84	7.33e-06	0.0003	-2.21	6.92e-08	5.32e-06
LMO7	LIM domain 7	protein-coding	-1.97	1.34e-06	9.47e-05	-2.2	4.92e-08	4.23e-06
ITGBL1	integrin subunit beta like 1	protein-coding	-2	1.78e-07	2.14e-05	-2.19	2.51e-07	1.39e-05
N4BP2L2	NEDD4 binding protein 2 like 2	protein-coding	-1.68	0.0001	0.0024	-2.19	3.74e-08	3.42e-06
RECQL	RecQ like helicase	protein-coding	-1.99	2.22e-07	2.51e-05	-2.18	2.34e-08	2.5e-06
THAP9-AS1	THAP9 antisense RNA 1	ncRNA	-1.86	7.31e-08	1.21e-05	-2.18	2.85e-09	5.64e-07
RHOJ	ras homolog family member J	protein-coding	-2.9	2.65e-10	1.9e-07	-2.17	1.87e-06	6.35e-05
UBE2Q2P1	ubiquitin conjugating enzyme E2 Q2 pseudogene 1	pseudo	-1.92	8.04e-09	2.26e-06	-2.17	2.65e-11	1.67e-08
FLJ42393	uncharacterized LOC401105	ncRNA	-1.84	1.44e-06	9.9e-05	-2.16	3.06e-09	5.84e-07
SPTAN1	spectrin alpha, non-erythrocytic 1	protein-coding	-2	1.02e-12	6.83e-09	-2.16	5.1e-14	2.12e-10
C11orf96	chromosome 11 open reading frame 96	protein-coding	-2.49	5.39e-05	0.0014	-2.15	0.0003	0.0036
RPL13AP6	ribosomal protein L13a pseudogene 6	pseudo	-1.83	9.58e-07	7.28e-05	-2.15	1.08e-08	1.34e-06
SNORA70B	small nucleolar RNA, H/ACA box 70B	snoRNA	-1.97	7.57e-09	2.16e-06	-2.14	1.81e-09	4.1e-07
VPS13A	vacuolar protein sorting 13 homolog A	protein-coding	-1.95	9.26e-07	7.12e-05	-2.14	8.45e-09	1.1e-06
BTG2	BTG anti-proliferation factor 2	protein-coding	-1.85	2.44e-05	0.0008	-2.13	2.34e-06	7.54e-05
CSRNP1	cysteine and serine rich nuclear protein 1	protein-coding	-2.18	3.12e-09	1.25e-06	-2.13	3.24e-07	1.66e-05
RECK	reversion inducing cysteine rich protein with kazal motifs	protein-coding	-1.83	0.0006	0.008	-2.13	5.11e-05	0.0008
LINC02969	long intergenic non-protein coding RNA 2969	ncRNA	-1.91	9.56e-08	1.47e-05	-2.12	5.01e-09	7.83e-07
FABP3	fatty acid binding protein 3	protein-coding	-2.09	3.03e-05	0.0009	-2.11	0.0006	0.006
SLC7A5P2	solute carrier family 7 member 5 pseudogene 2	pseudo	-2.04	2.93e-07	3.02e-05	-2.1	5.7e-07	2.57e-05
WNT4	Wnt family member 4	protein-coding	-2.2	1.6e-06	0.0001	-2.1	8.66e-07	3.45e-05
ABCA10	ATP binding cassette subfamily A member 10	protein-coding	-1.76	3.71e-05	0.0011	-2.09	6.89e-06	0.0002
CUL4B	cullin 4B	protein-coding	-1.66	2.81e-05	0.0009	-2.09	9.98e-08	6.98e-06
LRRFIP1	LRR binding FLII interacting protein 1	protein-coding	-1.8	1.52e-06	0.0001	-2.09	6.17e-08	4.84e-06
MGAT5	alpha-1,6-mannosylglycoprotein 6-beta-N-acetylglucosaminyltransferase	protein-coding	-2.03	4.26e-08	7.84e-06	-2.09	1.16e-07	7.97e-06
PABPC1L	poly(A) binding protein cytoplasmic 1 like	protein-coding	-1.67	2.48e-07	2.69e-05	-2.09	1.64e-10	6.51e-08
FZD6	frizzled class receptor 6	protein-coding	-1.8	4.53e-05	0.0012	-2.08	8.31e-07	3.38e-05
GALNT7	polypeptide N-acetylgalactosaminyltransferase 7	protein-coding	-1.65	1.99e-06	0.0001	-2.08	3.92e-09	6.58e-07
CBLB	Cbl proto-oncogene B	protein-coding	-1.81	5.34e-06	0.0003	-2.07	3.74e-06	0.0001
FNIP2	folliculin interacting protein 2	protein-coding	-1.78	1.06e-06	7.92e-05	-2.07	5.45e-08	4.48e-06
GNPTAB	N-acetylglucosamine-1-phosphate transferase subunits alpha and beta	protein-coding	-1.78	1.11e-06	8.14e-05	-2.07	5.18e-08	4.39e-06
MFGE8	milk fat globule EGF and factor V/VIII domain containing	protein-coding	-2.08	0.0001	0.0023	-2.07	0.0011	0.009
NCKAP5	NCK associated protein 5	protein-coding	-2.88	8.22e-07	6.52e-05	-2.07	0.0009	0.0075
RALGAPA1	Ral GTPase activating protein catalytic subunit alpha 1	protein-coding	-1.74	1.3e-08	3.22e-06	-2.07	4.72e-12	5.46e-09
RPGRIP1L	RPGRIP1 like	protein-coding	-1.7	8.14e-08	1.3e-05	-2.07	1.11e-10	4.92e-08
TAS2R19	taste 2 receptor member 19	protein-coding	-1.73	3.78e-06	0.0002	-2.07	5.58e-08	4.5e-06
USP17L2	ubiquitin specific peptidase 17 like family member 2	protein-coding	-1.92	2.86e-06	0.0002	-2.07	7.02e-07	2.98e-05
ARID4B	AT-rich interaction domain 4B	protein-coding	-1.71	6.87e-09	2.06e-06	-2.06	7.37e-12	6.67e-09
HEATR5A	HEAT repeat containing 5A	protein-coding	-1.89	2.98e-10	2.07e-07	-2.06	3.43e-10	1.19e-07
LOC90246	uncharacterized LOC90246	ncRNA	-1.91	3.99e-06	0.0002	-2.06	5.57e-06	0.0002
PEAK1	pseudopodium enriched atypical kinase 1	protein-coding	-1.94	1.46e-09	7.06e-07	-2.06	1.55e-11	1.19e-08
PTPN12	protein tyrosine phosphatase non-receptor type 12	protein-coding	-1.76	7.28e-06	0.0003	-2.06	5.66e-09	8.53e-07
RGS2	regulator of G protein signaling 2	protein-coding	-1.98	1.9e-07	2.21e-05	-2.06	4.64e-07	2.18e-05
AHSA2P	activator of HSP90 ATPase homolog 2, pseudogene	pseudo	-1.76	4.9e-07	4.47e-05	-2.05	7.41e-09	1.04e-06
CCDC80	coiled-coil domain containing 80	protein-coding	-2.03	1.7e-07	2.08e-05	-2.05	3.69e-08	3.41e-06
CMAHP	cytidine monophospho-N-acetylneuraminic acid hydroxylase, pseudogene	pseudo	-1.66	0.0005	0.0068	-2.05	0.0002	0.0022
KMT2A	lysine methyltransferase 2A	protein-coding	-1.9	1.59e-09	7.52e-07	-2.05	7.02e-11	3.65e-08
NDFIP2	Nedd4 family interacting protein 2	protein-coding	-1.72	1.38e-06	9.59e-05	-2.05	3.25e-08	3.14e-06
SETD7	SET domain containing 7, histone lysine methyltransferase	protein-coding	-1.89	3.11e-09	1.25e-06	-2.05	1.27e-10	5.35e-08
TAS2R20	taste 2 receptor member 20	protein-coding	-1.7	1.03e-06	7.7e-05	-2.05	5.47e-08	4.48e-06
ZFC3H1	zinc finger C3H1-type containing	protein-coding	-1.75	1.42e-07	1.83e-05	-2.05	1.14e-11	9.15e-09
ATXN2	ataxin 2	protein-coding	-1.77	2e-07	2.3e-05	-2.04	3.25e-09	6.1e-07
FZD8	frizzled class receptor 8	protein-coding	-2.01	6.94e-06	0.0003	-2.04	8.72e-05	0.0013
TDRD3	tudor domain containing 3	protein-coding	-1.56	6.36e-07	5.52e-05	-2.04	2.47e-11	1.61e-08
ANKRD29	ankyrin repeat domain 29	protein-coding	-1.68	5.22e-05	0.0014	-2.03	9.27e-06	0.0002
ARHGAP12	Rho GTPase activating protein 12	protein-coding	-1.56	8.57e-05	0.002	-2.03	2.68e-08	2.69e-06
KLF10	Kruppel like factor 10	protein-coding	-1.8	2.06e-05	0.0007	-2.03	2.02e-06	6.7e-05
OPTN	optineurin	protein-coding	-1.85	5.06e-08	9e-06	-2.03	6.47e-09	9.42e-07
PLEKHG3	pleckstrin homology and RhoGEF domain containing G3	protein-coding	-1.79	1.82e-06	0.0001	-2.03	7.1e-07	3e-05
DDX60L	DExD/H-box 60 like	protein-coding	-1.6	3.66e-05	0.0011	-2.02	3.67e-08	3.41e-06
FERMT2	FERM domain containing kindlin 2	protein-coding	-1.77	2.59e-05	0.0008	-2.02	1.04e-06	3.94e-05
RASSF8-AS1	RASSF8 antisense RNA 1	ncRNA	-1.75	3.44e-07	3.43e-05	-2.02	7.51e-09	1.05e-06
NLRP10	NLR family pyrin domain containing 10	protein-coding	-2.31	1.47e-05	0.0005	-2.02	0.001	0.0082
PFN1P2	profilin 1 pseudogene 2	pseudo	-1.74	5.28e-07	4.76e-05	-2.02	1.98e-09	4.35e-07
STK38	serine/threonine kinase 38	protein-coding	-2.01	4.37e-12	9.09e-09	-2.02	3.3e-12	4.04e-09
TPR	translocated promoter region, nuclear basket protein	protein-coding	-1.51	0.0003	0.0043	-2.02	2.08e-09	4.46e-07
ANKH	ANKH inorganic pyrophosphate transport regulator	protein-coding	-1.94	3.87e-07	3.78e-05	-2	2.86e-05	0.0005
MPHOSPH8	M-phase phosphoprotein 8	protein-coding	-1.77	6.71e-08	1.13e-05	-2	3.56e-10	1.19e-07
MTHFD1L	methylenetetrahydrofolate dehydrogenase (NADP+ dependent) 1 like	protein-coding	-1.95	1.63e-12	6.83e-09	-2	8.02e-13	1.52e-09
SAMD9	sterile alpha motif domain containing 9	protein-coding	-1.62	0.0008	0.0097	-2	6.53e-05	0.001
GLS	glutaminase	protein-coding	-1.72	8.35e-06	0.0003	-1.99	3.51e-09	6.14e-07
LPCAT2	lysophosphatidylcholine acyltransferase 2	protein-coding	-1.76	4.52e-05	0.0012	-1.99	6.79e-05	0.001
PCGF5	polycomb group ring finger 5	protein-coding	-1.57	8.54e-06	0.0004	-1.99	3.43e-09	6.13e-07
SNORA70F	small nucleolar RNA, H/ACA box 70F	snoRNA	-1.94	2.04e-06	0.0001	-1.99	3.21e-06	9.73e-05
CRYGS	crystallin gamma S	protein-coding	-1.87	7.57e-10	4.26e-07	-1.98	4.98e-10	1.57e-07
KLF2	Kruppel like factor 2	protein-coding	-1.85	8.89e-05	0.002	-1.98	0.0004	0.004
MPRIP	myosin phosphatase Rho interacting protein	protein-coding	-1.84	1.28e-06	9.15e-05	-1.98	3.91e-07	1.91e-05
PARD3B	par-3 family cell polarity regulator beta	protein-coding	-1.84	0.0001	0.0028	-1.98	3.22e-05	0.0006
PTAR1	protein prenyltransferase alpha subunit repeat containing 1	protein-coding	-1.72	2.75e-07	2.86e-05	-1.98	5.17e-09	8.02e-07
SRSF5	serine and arginine rich splicing factor 5	protein-coding	-1.68	3.87e-08	7.6e-06	-1.97	6.95e-12	6.58e-09
NALCN	sodium leak channel, non-selective	protein-coding	-1.98	1.61e-05	0.0006	-1.96	0.0001	0.0015
PITX2	paired like homeodomain 2	protein-coding	-1.99	0.0003	0.0049	-1.96	0.0011	0.009
TAS2R14	taste 2 receptor member 14	protein-coding	-1.86	3.79e-09	1.36e-06	-1.96	8.77e-10	2.47e-07
TMEM117	transmembrane protein 117	protein-coding	-1.77	6.52e-07	5.6e-05	-1.96	3.61e-07	1.81e-05
ANKIB1	ankyrin repeat and IBR domain containing 1	protein-coding	-1.7	1.33e-05	0.0005	-1.95	3.27e-08	3.14e-06
BLZF1	basic leucine zipper nuclear factor 1	protein-coding	-1.59	0.0004	0.006	-1.95	1.37e-06	4.96e-05
CPLANE1	ciliogenesis and planar polarity effector 1	protein-coding	-1.55	1.7e-06	0.0001	-1.95	2.89e-10	1.04e-07
LANCL1	LanC like 1	protein-coding	-1.67	0.0002	0.0036	-1.95	4.06e-07	1.95e-05
OLFM1	olfactomedin 1	protein-coding	-1.88	0.0004	0.0062	-1.95	0.001	0.0084
PHTF2	putative homeodomain transcription factor 2	protein-coding	-1.52	0.0008	0.0098	-1.95	1.01e-05	0.0002
PRR14L	proline rich 14 like	protein-coding	-1.68	5.86e-08	1e-05	-1.95	8.27e-11	4.1e-08
PTK2B	protein tyrosine kinase 2 beta	protein-coding	-1.79	0.0006	0.008	-1.95	0.0002	0.0021
RNF150	ring finger protein 150	protein-coding	-1.88	0.0001	0.0027	-1.95	0.0005	0.0047
SKIL	SKI like proto-oncogene	protein-coding	-1.69	0.0001	0.0026	-1.95	2.28e-07	1.29e-05
TMEM11	transmembrane protein 11	protein-coding	-1.78	0.0001	0.0028	-1.95	0.0002	0.0021
CCNL2	cyclin L2	protein-coding	-1.77	2.47e-07	2.69e-05	-1.94	1.07e-09	2.82e-07
CLIP4	CAP-Gly domain containing linker protein family member 4	protein-coding	-1.61	0.0003	0.0046	-1.94	7.85e-06	0.0002
CYCSP52	CYCS pseudogene 52	pseudo	-1.79	3.48e-08	7.04e-06	-1.94	3.8e-08	3.42e-06
FOXC2	forkhead box C2	protein-coding	-2.28	8.02e-07	6.46e-05	-1.94	2.03e-05	0.0004
PLK3	polo like kinase 3	protein-coding	-1.81	1.58e-07	1.97e-05	-1.94	1.32e-07	8.76e-06
SLC7A6	solute carrier family 7 member 6	protein-coding	-1.88	1.64e-12	6.83e-09	-1.94	6.68e-12	6.58e-09
SREK1	splicing regulatory glutamic acid and lysine rich protein 1	protein-coding	-1.51	3.73e-05	0.0011	-1.94	4.77e-09	7.58e-07
SSB	small RNA binding exonuclease protection factor La	protein-coding	-1.8	1.83e-06	0.0001	-1.94	7.04e-08	5.39e-06
ZNF84	zinc finger protein 84	protein-coding	-1.68	1.08e-07	1.57e-05	-1.94	8.66e-09	1.12e-06
ADAM9	ADAM metallopeptidase domain 9	protein-coding	-1.57	2.51e-05	0.0008	-1.93	8.23e-08	6.05e-06
ATRX	ATRX chromatin remodeler	protein-coding	-1.62	0.0002	0.0035	-1.93	2.86e-07	1.51e-05
HSPH1	heat shock protein family H (Hsp110) member 1	protein-coding	-1.9	7.98e-07	6.46e-05	-1.93	3.75e-08	3.42e-06
JAK1	Janus kinase 1	protein-coding	-1.6	0.0002	0.0041	-1.93	3.13e-06	9.57e-05
LINC00672	long intergenic non-protein coding RNA 672	ncRNA	-1.79	1.38e-08	3.38e-06	-1.93	7.05e-10	2.07e-07
RABGEF1	RAB guanine nucleotide exchange factor 1	protein-coding	-1.84	2.27e-12	7.88e-09	-1.93	1.99e-13	5.17e-10
RIOK2	RIO kinase 2	protein-coding	-1.63	2.27e-06	0.0001	-1.93	9.25e-10	2.53e-07
TTC37	tetratricopeptide repeat domain 37	protein-coding	-1.73	0.0002	0.0035	-1.93	5.25e-07	2.41e-05
CHMP1B	charged multivesicular body protein 1B	protein-coding	-1.82	1.69e-09	7.81e-07	-1.92	1.84e-08	2.06e-06
FOXO1	forkhead box O1	protein-coding	-1.66	2.97e-06	0.0002	-1.92	7.6e-07	3.16e-05
FRY	FRY microtubule binding protein	protein-coding	-2.07	0.0001	0.0025	-1.92	0.001	0.0085
SEMA4A	semaphorin 4A	protein-coding	-1.74	9.69e-06	0.0004	-1.92	4.06e-07	1.95e-05
SETX	senataxin	protein-coding	-1.72	4.56e-07	4.21e-05	-1.92	8.24e-10	2.35e-07
TRIP11	thyroid hormone receptor interactor 11	protein-coding	-1.54	0.0002	0.0034	-1.92	1.17e-08	1.43e-06
XG	Xg glycoprotein (Xg blood group)	protein-coding	-1.86	4.69e-05	0.0013	-1.92	5.45e-05	0.0009
JMJD1C	jumonji domain containing 1C	protein-coding	-1.61	4.75e-06	0.0002	-1.91	1.78e-08	2.03e-06
MED23	mediator complex subunit 23	protein-coding	-1.65	1.34e-07	1.76e-05	-1.91	4.63e-10	1.48e-07
PPP1CC	protein phosphatase 1 catalytic subunit gamma	protein-coding	-1.66	2.87e-05	0.0009	-1.91	4.89e-07	2.27e-05
SH3BP5	SH3 domain binding protein 5	protein-coding	-1.66	0.0005	0.0071	-1.91	2.34e-05	0.0005
SLC36A1	solute carrier family 36 member 1	protein-coding	-1.84	1.56e-07	1.96e-05	-1.91	6.62e-07	2.84e-05
DYNLT4	dynein light chain Tctex-type 4	protein-coding	-1.86	4.36e-06	0.0002	-1.91	1.05e-05	0.0002
FRS2	fibroblast growth factor receptor substrate 2	protein-coding	-1.66	1.28e-06	9.15e-05	-1.9	1.66e-10	6.51e-08
LINC01133	long intergenic non-protein coding RNA 1133	ncRNA	-2.03	1.7e-05	0.0006	-1.9	0.0002	0.0027
KMT2C	lysine methyltransferase 2C	protein-coding	-1.69	9.55e-09	2.58e-06	-1.9	8.61e-12	7.47e-09
SRGAP2B	SLIT-ROBO Rho GTPase activating protein 2B	protein-coding	-1.64	5.4e-06	0.0003	-1.9	1.84e-07	1.12e-05
CEP295	centrosomal protein 295	protein-coding	-1.53	2e-05	0.0007	-1.89	2.65e-08	2.69e-06
PER1	period circadian regulator 1	protein-coding	-1.9	1.29e-05	0.0005	-1.89	4.93e-05	0.0008
PRSS12	serine protease 12	protein-coding	-2.04	5.64e-06	0.0003	-1.89	0.0003	0.0035
CALD1	caldesmon 1	protein-coding	-1.77	0.0003	0.005	-1.88	2.05e-05	0.0004
FNBP1L	formin binding protein 1 like	protein-coding	-1.56	0.0004	0.0065	-1.88	2.65e-06	8.42e-05
LDHAL6B	lactate dehydrogenase A like 6B	protein-coding	-1.73	0.0002	0.004	-1.88	9e-05	0.0013
LTN1	listerin E3 ubiquitin protein ligase 1	protein-coding	-1.52	0.0002	0.004	-1.88	9.55e-08	6.78e-06
METTL15	methyltransferase like 15	protein-coding	-1.51	2.34e-05	0.0008	-1.88	2.99e-09	5.8e-07
NEK10	NIMA related kinase 10	protein-coding	-1.75	3.87e-06	0.0002	-1.88	3.04e-05	0.0006
ORMDL1	ORMDL sphingolipid biosynthesis regulator 1	protein-coding	-1.76	5.52e-08	9.57e-06	-1.88	1.03e-08	1.29e-06
WNK1	WNK lysine deficient protein kinase 1	protein-coding	-1.51	5.33e-06	0.0003	-1.88	3.01e-09	5.8e-07
EP300	E1A binding protein p300	protein-coding	-1.72	1.18e-08	3.03e-06	-1.87	4.3e-11	2.42e-08
GGCT	gamma-glutamylcyclotransferase	protein-coding	-1.75	9.86e-07	7.44e-05	-1.87	9.82e-09	1.24e-06
SLC7A5P1	solute carrier family 7 member 5 pseudogene 1	pseudo	-1.78	4.09e-07	3.94e-05	-1.87	2.01e-07	1.19e-05
SPATA5	spermatogenesis associated 5	protein-coding	-1.55	2.46e-06	0.0001	-1.87	3.43e-08	3.23e-06
ZNF10	zinc finger protein 10	protein-coding	-1.72	1.1e-07	1.57e-05	-1.87	3.3e-09	6.13e-07
BTBD1	BTB domain containing 1	protein-coding	-1.73	2.06e-08	4.7e-06	-1.86	6.66e-10	2.01e-07
BTBD3	BTB domain containing 3	protein-coding	-1.6	0.0001	0.0028	-1.86	4.19e-06	0.0001
ADGRE5	adhesion G protein-coupled receptor E5	protein-coding	-1.56	0.0001	0.0026	-1.86	3.39e-05	0.0006
CDC73	cell division cycle 73	protein-coding	-1.65	3.12e-05	0.0009	-1.86	2.71e-07	1.45e-05
DGKI	diacylglycerol kinase iota	protein-coding	-2.13	3.76e-07	3.69e-05	-1.86	3.48e-05	0.0006
DICER1	dicer 1, ribonuclease III	protein-coding	-1.52	5.71e-06	0.0003	-1.86	4.94e-09	7.79e-07
DPP8	dipeptidyl peptidase 8	protein-coding	-1.59	1.05e-05	0.0004	-1.86	2.81e-08	2.77e-06
EPRS1	glutamyl-prolyl-tRNA synthetase 1	protein-coding	-1.59	7.92e-06	0.0003	-1.86	6.8e-09	9.75e-07
FTX	FTX transcript, XIST regulator	ncRNA	-1.54	2.04e-06	0.0001	-1.86	1.26e-09	3.15e-07
NNMT	nicotinamide N-methyltransferase	protein-coding	-1.77	2.04e-06	0.0001	-1.86	2.77e-06	8.67e-05
PLEKHA3	pleckstrin homology domain containing A3	protein-coding	-1.75	9.5e-05	0.0021	-1.86	1.65e-05	0.0004
RASSF2	Ras association domain family member 2	protein-coding	-2.04	4.26e-05	0.0012	-1.86	0.0009	0.0075
SYDE2	synapse defective Rho GTPase homolog 2	protein-coding	-1.57	2.28e-06	0.0001	-1.86	7.91e-09	1.07e-06
C1orf198	chromosome 1 open reading frame 198	protein-coding	-1.86	2.99e-05	0.0009	-1.85	3.44e-05	0.0006
DCUN1D1	defective in cullin neddylation 1 domain containing 1	protein-coding	-1.62	5.76e-06	0.0003	-1.85	1.62e-08	1.9e-06
LINC00597	long intergenic non-protein coding RNA 597	ncRNA	-1.58	3.87e-05	0.0011	-1.85	1.03e-06	3.93e-05
SRP54	signal recognition particle 54	protein-coding	-1.54	9.68e-05	0.0021	-1.85	1.69e-08	1.97e-06
STK38L	serine/threonine kinase 38 like	protein-coding	-1.77	0.0002	0.0038	-1.85	0.0004	0.004
TTC21B	tetratricopeptide repeat domain 21B	protein-coding	-1.51	6.66e-05	0.0016	-1.85	1.46e-07	9.46e-06
APC	APC regulator of WNT signaling pathway	protein-coding	-1.56	4.09e-05	0.0012	-1.84	3.31e-08	3.16e-06
BIRC6	baculoviral IAP repeat containing 6	protein-coding	-1.6	1.96e-08	4.61e-06	-1.84	3.38e-11	2.01e-08
MAP3K7CL	MAP3K7 C-terminal like	protein-coding	-1.92	0.0004	0.0061	-1.84	0.0005	0.0047
DCAF13P3	DDB1 and CUL4 associated factor 13 pseudogene 3	pseudo	-1.61	8.63e-07	6.8e-05	-1.84	7.23e-08	5.45e-06
FBXO3	F-box protein 3	protein-coding	-1.58	7.74e-07	6.32e-05	-1.84	1.07e-09	2.82e-07
GDPD5	glycerophosphodiester phosphodiesterase domain containing 5	protein-coding	-1.61	2.66e-06	0.0002	-1.84	8.26e-07	3.37e-05
LOC145474	uncharacterized LOC145474	ncRNA	-1.83	1.15e-07	1.62e-05	-1.84	4.8e-07	2.24e-05
MRPS30	mitochondrial ribosomal protein S30	protein-coding	-1.62	0.0001	0.0027	-1.84	1e-06	3.85e-05
TENT2	terminal nucleotidyltransferase 2	protein-coding	-1.66	6.13e-07	5.36e-05	-1.84	2.47e-09	5.09e-07
SCARNA17	small Cajal body-specific RNA 17	ncRNA	-1.77	1.24e-07	1.66e-05	-1.84	8.77e-08	6.38e-06
SF3B1	splicing factor 3b subunit 1	protein-coding	-1.59	9.81e-08	1.47e-05	-1.84	6.4e-12	6.58e-09
AFAP1	actin filament associated protein 1	protein-coding	-2	7.66e-14	1.59e-09	-1.83	1.29e-10	5.35e-08
AHI1	Abelson helper integration site 1	protein-coding	-1.68	9.64e-08	1.47e-05	-1.83	3.65e-09	6.28e-07
SMG1P3	SMG1 pseudogene 3	pseudo	-1.64	6.87e-06	0.0003	-1.83	4.8e-08	4.16e-06
MAP2K3	mitogen-activated protein kinase kinase 3	protein-coding	-1.68	6.14e-06	0.0003	-1.83	4.46e-06	0.0001
MUC1	mucin 1, cell surface associated	protein-coding	-1.61	8.36e-05	0.0019	-1.83	1.2e-05	0.0003
PIGA	phosphatidylinositol glycan anchor biosynthesis class A	protein-coding	-1.78	3.53e-09	1.29e-06	-1.83	3.61e-09	6.27e-07
PILRB	paired immunoglobin like type 2 receptor beta	protein-coding	-1.67	3.14e-07	3.18e-05	-1.83	1.95e-08	2.17e-06
RPL21P44	ribosomal protein L21 pseudogene 44	pseudo	-1.85	3.45e-11	4.79e-08	-1.83	1.79e-10	6.88e-08
ZNF708	zinc finger protein 708	protein-coding	-1.61	5.86e-09	1.82e-06	-1.83	3.97e-11	2.29e-08
DOCK7	dedicator of cytokinesis 7	protein-coding	-1.62	9.83e-08	1.47e-05	-1.82	4.36e-10	1.42e-07
EFHC1	EF-hand domain containing 1	protein-coding	-1.67	2.3e-07	2.54e-05	-1.82	2.78e-08	2.76e-06
LEO1	LEO1 homolog, Paf1/RNA polymerase II complex component	protein-coding	-1.57	0.0005	0.0071	-1.82	7.07e-06	0.0002
PCYOX1	prenylcysteine oxidase 1	protein-coding	-1.72	5.19e-06	0.0003	-1.82	1.14e-06	4.25e-05
PLEKHH2	pleckstrin homology, MyTH4 and FERM domain containing H2	protein-coding	-1.67	6.87e-06	0.0003	-1.82	6.43e-06	0.0002
PRPF18	pre-mRNA processing factor 18	protein-coding	-1.65	1.21e-08	3.03e-06	-1.82	2.05e-11	1.47e-08
SNAI1	snail family transcriptional repressor 1	protein-coding	-1.92	1.16e-05	0.0004	-1.82	4.16e-05	0.0007
STAMBPL1	STAM binding protein like 1	protein-coding	-1.7	1.33e-05	0.0005	-1.82	6.64e-05	0.001
SYT12	synaptotagmin 12	protein-coding	-1.96	4.92e-09	1.65e-06	-1.82	9.11e-08	6.56e-06
UBR1	ubiquitin protein ligase E3 component n-recognin 1	protein-coding	-1.6	1.04e-05	0.0004	-1.82	2.23e-08	2.43e-06
ZFR	zinc finger RNA binding protein	protein-coding	-1.73	6.34e-07	5.52e-05	-1.82	7.74e-08	5.73e-06
FHL2	four and a half LIM domains 2	protein-coding	-1.76	9.85e-07	7.44e-05	-1.81	1.88e-07	1.14e-05
INTU	inturned planar cell polarity protein	protein-coding	-1.68	5.53e-05	0.0014	-1.81	1.71e-05	0.0004
EBLN3P	endogenous Bornavirus like nucleoprotein 3, pseudogene	pseudo	-1.55	1.55e-07	1.95e-05	-1.81	3.39e-10	1.19e-07
SCARNA5	small Cajal body-specific RNA 5	ncRNA	-2.9	1.22e-07	1.64e-05	-1.81	0.0003	0.0034
SLC38A1	solute carrier family 38 member 1	protein-coding	-1.58	0.0002	0.0036	-1.81	8.06e-06	0.0002
SORT1	sortilin 1	protein-coding	-2.12	3.65e-06	0.0002	-1.81	0.0001	0.0018
ZNF300	zinc finger protein 300	protein-coding	-1.66	8.14e-09	2.26e-06	-1.81	4.39e-09	7.2e-07
ZRANB2	zinc finger RANBP2-type containing 2	protein-coding	-1.72	1.86e-08	4.45e-06	-1.81	6.64e-09	9.6e-07
ARL5B	ADP ribosylation factor like GTPase 5B	protein-coding	-1.54	1.49e-06	0.0001	-1.8	6.89e-10	2.05e-07
GIGYF2	GRB10 interacting GYF protein 2	protein-coding	-1.68	4.27e-06	0.0002	-1.8	5.52e-08	4.48e-06
HELZ	helicase with zinc finger	protein-coding	-1.54	4.91e-09	1.65e-06	-1.8	1.4e-12	2.43e-09
KLRA1P	killer cell lectin like receptor A1, pseudogene	pseudo	-1.53	1.86e-05	0.0006	-1.8	2.63e-07	1.43e-05
LINC01347	long intergenic non-protein coding RNA 1347	ncRNA	-1.57	1.34e-05	0.0005	-1.8	1.82e-07	1.11e-05
USP45	ubiquitin specific peptidase 45	protein-coding	-1.54	5.79e-05	0.0015	-1.8	6.01e-08	4.75e-06
ZBTB41	zinc finger and BTB domain containing 41	protein-coding	-1.57	8.99e-05	0.002	-1.8	7.36e-08	5.53e-06
GANC	glucosidase alpha, neutral C	protein-coding	-1.67	4.3e-08	7.84e-06	-1.79	6.33e-09	9.27e-07
LRRC41	leucine rich repeat containing 41	protein-coding	-1.62	1.37e-06	9.59e-05	-1.79	2.33e-08	2.5e-06
PDLIM5	PDZ and LIM domain 5	protein-coding	-1.93	3.46e-05	0.001	-1.79	0.0003	0.0032
PLS3	plastin 3	protein-coding	-1.56	0.0002	0.0039	-1.79	9.84e-06	0.0002
TNKS	tankyrase	protein-coding	-1.56	6.44e-06	0.0003	-1.79	4.38e-08	3.86e-06
MAP3K1	mitogen-activated protein kinase kinase kinase 1	protein-coding	-1.73	2.92e-05	0.0009	-1.78	0.0002	0.0025
PHLDB2	pleckstrin homology like domain family B member 2	protein-coding	-1.79	6.95e-06	0.0003	-1.78	1.34e-05	0.0003
TAS2R30	taste 2 receptor member 30	protein-coding	-1.78	1.71e-07	2.08e-05	-1.78	2.34e-07	1.31e-05
VTN	vitronectin	protein-coding	-1.9	1.43e-05	0.0005	-1.78	0.0001	0.0015
XPO4	exportin 4	protein-coding	-1.58	3.83e-08	7.6e-06	-1.78	1.16e-10	5.02e-08
ZNF529	zinc finger protein 529	protein-coding	-1.54	1.8e-06	0.0001	-1.78	1.23e-08	1.48e-06
CBX1	chromobox 1	protein-coding	-1.7	2.47e-05	0.0008	-1.77	5.86e-06	0.0002
CCNH	cyclin H	protein-coding	-1.67	6.55e-05	0.0016	-1.77	1.64e-06	5.82e-05
DDX5	DEAD-box helicase 5	protein-coding	-1.67	3.39e-10	2.2e-07	-1.77	1.1e-11	9.14e-09
DPF3	double PHD fingers 3	protein-coding	-1.98	1.66e-05	0.0006	-1.77	0.0002	0.0028
HSPG2	heparan sulfate proteoglycan 2	protein-coding	-1.54	2e-06	0.0001	-1.77	5.57e-08	4.5e-06
ARHGAP27P1	Rho GTPase activating protein 27 pseudogene 1	pseudo	-1.57	4.14e-05	0.0012	-1.77	5.01e-06	0.0001
MAP4K5	mitogen-activated protein kinase kinase kinase kinase 5	protein-coding	-1.65	1.91e-06	0.0001	-1.77	6.12e-08	4.83e-06
PLXNA2	plexin A2	protein-coding	-1.88	6.19e-05	0.0016	-1.77	0.001	0.0085
SEPTIN11	septin 11	protein-coding	-1.54	1.99e-06	0.0001	-1.77	2.27e-07	1.29e-05
TAS2R13	taste 2 receptor member 13	protein-coding	-1.52	9.96e-06	0.0004	-1.77	4.56e-07	2.15e-05
ZFP37	ZFP37 zinc finger protein	protein-coding	-1.5	7.11e-06	0.0003	-1.77	2.71e-07	1.45e-05
ETF1	eukaryotic translation termination factor 1	protein-coding	-1.59	1.42e-05	0.0005	-1.76	1.74e-07	1.08e-05
INSIG2	insulin induced gene 2	protein-coding	-1.63	6.39e-06	0.0003	-1.76	1.19e-06	4.4e-05
KIAA1671	KIAA1671	protein-coding	-1.72	8.4e-05	0.0019	-1.76	9.65e-05	0.0014
MYEF2	myelin expression factor 2	protein-coding	-1.63	0.0003	0.0054	-1.76	4.2e-05	0.0007
SUMO4	small ubiquitin like modifier 4	protein-coding	-1.54	0.0002	0.003	-1.76	9.25e-06	0.0002
AP3B1	adaptor related protein complex 3 subunit beta 1	protein-coding	-1.63	5.48e-09	1.75e-06	-1.75	5.41e-11	2.96e-08
CAPN3	calpain 3	protein-coding	-1.75	3.09e-07	3.14e-05	-1.75	2.58e-07	1.41e-05
FAR1	fatty acyl-CoA reductase 1	protein-coding	-1.53	1.94e-05	0.0007	-1.75	3.78e-08	3.42e-06
PIK3R2	phosphoinositide-3-kinase regulatory subunit 2	protein-coding	-1.6	7.4e-05	0.0018	-1.75	1.76e-06	6.04e-05
ZFP36	ZFP36 ring finger protein	protein-coding	-1.62	0.0002	0.0035	-1.75	0.0002	0.0024
ATP6V0A1	ATPase H+ transporting V0 subunit a1	protein-coding	-1.77	5.81e-06	0.0003	-1.74	8.35e-06	0.0002
FBXO38	F-box protein 38	protein-coding	-1.53	0.0001	0.0022	-1.74	5.5e-07	2.5e-05
LNPK	lunapark, ER junction formation factor	protein-coding	-1.51	8.8e-05	0.002	-1.74	3.22e-06	9.73e-05
MAMLD1	mastermind like domain containing 1	protein-coding	-1.79	0.0002	0.0036	-1.74	0.0001	0.0017
PPIP5K2	diphosphoinositol pentakisphosphate kinase 2	protein-coding	-1.55	1.07e-05	0.0004	-1.74	4.33e-08	3.84e-06
SCAND2P	SCAN domain containing 2 pseudogene	pseudo	-1.57	8.55e-06	0.0004	-1.74	3.92e-07	1.91e-05
UBR7	ubiquitin protein ligase E3 component n-recognin 7	protein-coding	-1.56	0.0002	0.0035	-1.74	2.13e-05	0.0004
WDR47	WD repeat domain 47	protein-coding	-1.59	6.59e-07	5.61e-05	-1.74	4.44e-08	3.9e-06
ZNRF2P1	zinc and ring finger 2 pseudogene 1	pseudo	-1.56	9.46e-05	0.0021	-1.74	2.15e-06	7.01e-05
SUGCT	succinyl-CoA:glutarate-CoA transferase	protein-coding	-1.5	1.17e-05	0.0004	-1.73	7.18e-08	5.45e-06
CEACAM19	CEA cell adhesion molecule 19	protein-coding	-1.63	1.29e-05	0.0005	-1.73	9.47e-06	0.0002
ECHDC2	enoyl-CoA hydratase domain containing 2	protein-coding	-1.61	1.06e-05	0.0004	-1.73	2.75e-06	8.64e-05
SMCR8	SMCR8-C9orf72 complex subunit	protein-coding	-1.61	6.41e-06	0.0003	-1.73	2.88e-07	1.51e-05
SPART	spartin	protein-coding	-1.56	0.0003	0.0053	-1.73	3.22e-06	9.73e-05
ST7	suppression of tumorigenicity 7	protein-coding	-1.58	2.42e-06	0.0001	-1.73	1.92e-07	1.16e-05
TMEM43	transmembrane protein 43	protein-coding	-1.56	6.57e-06	0.0003	-1.73	1.86e-06	6.32e-05
UBN2	ubinuclein 2	protein-coding	-1.59	7.97e-06	0.0003	-1.73	1.36e-07	9.04e-06
WWC3	WWC family member 3	protein-coding	-1.8	9.75e-09	2.6e-06	-1.73	3.02e-06	9.26e-05
ANKRD36	ankyrin repeat domain 36	protein-coding	-1.58	0.0008	0.0093	-1.72	3.47e-05	0.0006
HNRNPA2B1	heterogeneous nuclear ribonucleoprotein A2/B1	protein-coding	-1.56	0.0002	0.0034	-1.72	1.82e-07	1.11e-05
IDS	iduronate 2-sulfatase	protein-coding	-1.62	6.94e-09	2.06e-06	-1.72	3.7e-09	6.31e-07
MGC16025	uncharacterized LOC85009	ncRNA	-1.54	9.61e-05	0.0021	-1.72	2.09e-05	0.0004
NBR2	neighbor of BRCA1 lncRNA 2	ncRNA	-1.66	6.41e-05	0.0016	-1.72	1.88e-05	0.0004
SMAD1	SMAD family member 1	protein-coding	-1.51	8.15e-07	6.5e-05	-1.72	7.6e-09	1.06e-06
SNORA27	small nucleolar RNA, H/ACA box 27	snoRNA	-2.43	1.1e-06	8.12e-05	-1.72	0.0003	0.0036
STING1	stimulator of interferon response cGAMP interactor 1	protein-coding	-1.62	5.8e-06	0.0003	-1.72	7.82e-06	0.0002
UFL1	UFM1 specific ligase 1	protein-coding	-1.59	9.71e-05	0.0021	-1.72	8.53e-07	3.43e-05
ANKRD36B	ankyrin repeat domain 36B	protein-coding	-1.58	0.0005	0.007	-1.71	8.78e-05	0.0013
C1QTNF3	C1q and TNF related 3	protein-coding	-1.51	0.0005	0.0072	-1.71	0.0001	0.0016
DDHD2	DDHD domain containing 2	protein-coding	-1.66	1.62e-07	2e-05	-1.71	5.57e-09	8.53e-07
GLIS2	GLIS family zinc finger 2	protein-coding	-1.73	1.43e-07	1.83e-05	-1.71	5.67e-07	2.56e-05
NUAK1	NUAK family kinase 1	protein-coding	-2.17	3.54e-06	0.0002	-1.71	0.0009	0.0076
PIK3CA	phosphatidylinositol-4,5-bisphosphate 3-kinase catalytic subunit alpha	protein-coding	-1.53	0.0002	0.0034	-1.71	9.32e-07	3.65e-05
RAB40AL	RAB40A like	protein-coding	-1.58	4.92e-08	8.82e-06	-1.71	1.27e-09	3.15e-07
SH3RF1	SH3 domain containing ring finger 1	protein-coding	-1.53	1.92e-05	0.0006	-1.71	6.25e-07	2.76e-05
TJP1	tight junction protein 1	protein-coding	-1.66	9.09e-10	4.85e-07	-1.71	4.76e-09	7.58e-07
CDK13	cyclin dependent kinase 13	protein-coding	-1.53	9.28e-08	1.46e-05	-1.7	1.35e-09	3.26e-07
CHPF	chondroitin polymerizing factor	protein-coding	-1.81	4.27e-07	4e-05	-1.7	1.53e-05	0.0003
DYRK3	dual specificity tyrosine phosphorylation regulated kinase 3	protein-coding	-1.51	1.28e-05	0.0005	-1.7	3.37e-08	3.2e-06
ELF1	E74 like ETS transcription factor 1	protein-coding	-1.5	4.25e-06	0.0002	-1.7	6.55e-08	5.09e-06
FSTL3	follistatin like 3	protein-coding	-1.99	1.05e-05	0.0004	-1.7	0.0005	0.0051
MAN2A1	mannosidase alpha class 2A member 1	protein-coding	-1.58	2.19e-06	0.0001	-1.7	7.49e-08	5.61e-06
POU2F1	POU class 2 homeobox 1	protein-coding	-1.52	0.0008	0.0093	-1.7	1.49e-05	0.0003
SYNM	synemin	protein-coding	-1.73	1.8e-06	0.0001	-1.7	2.39e-05	0.0005
TBC1D12	TBC1 domain family member 12	protein-coding	-1.6	2.31e-05	0.0008	-1.7	1.18e-06	4.38e-05
DENND1A	DENN domain containing 1A	protein-coding	-1.64	4.15e-06	0.0002	-1.69	4.15e-07	1.98e-05
EBLN2	endogenous Bornavirus like nucleoprotein 2	protein-coding	-1.59	9.61e-08	1.47e-05	-1.69	1.04e-08	1.29e-06
LRRC1	leucine rich repeat containing 1	protein-coding	-1.68	2.03e-06	0.0001	-1.69	1.14e-05	0.0003
PTPRF	protein tyrosine phosphatase receptor type F	protein-coding	-1.6	2.76e-05	0.0009	-1.69	1.44e-05	0.0003
RPL29P2	ribosomal protein L29 pseudogene 2	pseudo	-1.56	5.87e-05	0.0015	-1.69	8.92e-06	0.0002
AP1G2	adaptor related protein complex 1 subunit gamma 2	protein-coding	-1.59	8.59e-05	0.002	-1.68	1.17e-05	0.0003
CLK4	CDC like kinase 4	protein-coding	-1.66	4.89e-05	0.0013	-1.68	0.0002	0.0021
CCN2	cellular communication network factor 2	protein-coding	-1.77	0.0004	0.0057	-1.68	0.0011	0.0088
CEP43	centrosomal protein 43	protein-coding	-1.51	2.42e-05	0.0008	-1.68	1.23e-06	4.51e-05
BEND3P3	BEN domain containing 3 pseudogene 3	pseudo	-1.65	1.22e-06	8.8e-05	-1.68	4.35e-06	0.0001
PWAR5	Prader Willi/Angelman region RNA 5	ncRNA	-1.65	5.92e-06	0.0003	-1.68	1.95e-05	0.0004
LINC01963	long intergenic non-protein coding RNA 1963	ncRNA	-1.57	0.0007	0.0086	-1.68	8.47e-05	0.0012
UBE2B	ubiquitin conjugating enzyme E2 B	protein-coding	-1.54	5.95e-05	0.0015	-1.68	1.23e-06	4.51e-05
ANKRD44	ankyrin repeat domain 44	protein-coding	-1.79	3.08e-08	6.42e-06	-1.67	6.5e-06	0.0002
HES4	hes family bHLH transcription factor 4	protein-coding	-1.96	6.6e-07	5.61e-05	-1.67	0.0003	0.0033
LINC02893	long intergenic non-protein coding RNA 2893	ncRNA	-1.64	0.0004	0.0059	-1.67	0.0002	0.0028
PTP4A1	protein tyrosine phosphatase 4A1	protein-coding	-1.65	1.14e-05	0.0004	-1.67	9.5e-06	0.0002
RTL1	retrotransposon Gag like 1	protein-coding	-1.57	0.0003	0.0051	-1.67	0.0001	0.0016
STK17A	serine/threonine kinase 17a	protein-coding	-1.5	1.39e-05	0.0005	-1.67	2.87e-08	2.81e-06
TMPPE	transmembrane protein with metallophosphoesterase domain	protein-coding	-1.6	7.74e-08	1.26e-05	-1.67	9.52e-09	1.21e-06
UAP1	UDP-N-acetylglucosamine pyrophosphorylase 1	protein-coding	-1.56	5.13e-05	0.0014	-1.67	1.77e-05	0.0004
YBX1	Y-box binding protein 1	protein-coding	-1.62	0.0004	0.0061	-1.67	3.68e-05	0.0007
ARPC3	actin related protein 2/3 complex subunit 3	protein-coding	-1.51	0.0003	0.0048	-1.66	1.49e-05	0.0003
EPS8L2	EPS8 like 2	protein-coding	-1.62	6.59e-05	0.0016	-1.66	3.14e-05	0.0006
EXOC6	exocyst complex component 6	protein-coding	-1.58	1.38e-05	0.0005	-1.66	4.24e-06	0.0001
KCNQ1OT1	KCNQ1 opposite strand/antisense transcript 1	ncRNA	-1.57	5.36e-05	0.0014	-1.66	1.89e-05	0.0004
MXRA8	matrix remodeling associated 8	protein-coding	-1.53	0.0006	0.0075	-1.66	0.0005	0.0047
NEGR1	neuronal growth regulator 1	protein-coding	-1.72	4.65e-05	0.0013	-1.66	0.0004	0.004
PNPLA7	patatin like phospholipase domain containing 7	protein-coding	-1.53	0.0002	0.0029	-1.66	0.0001	0.0016
REEP3	receptor accessory protein 3	protein-coding	-1.67	2.94e-06	0.0002	-1.66	6.23e-07	2.76e-05
SNX3	sorting nexin 3	protein-coding	-1.64	5.86e-05	0.0015	-1.66	2.02e-06	6.7e-05
TAS2R46	taste 2 receptor member 46	protein-coding	-1.54	1.18e-07	1.62e-05	-1.66	3.81e-07	1.88e-05
TAS2R50	taste 2 receptor member 50	protein-coding	-1.63	1.09e-07	1.57e-05	-1.66	2.87e-07	1.51e-05
ARL17A	ADP ribosylation factor like GTPase 17A	protein-coding	-1.56	0.0003	0.0044	-1.65	1.84e-05	0.0004
SEC11A	SEC11 homolog A, signal peptidase complex subunit	protein-coding	-1.6	0.0002	0.0041	-1.65	4.87e-05	0.0008
SRRM1	serine and arginine repetitive matrix 1	protein-coding	-1.53	5.93e-06	0.0003	-1.65	1.13e-08	1.39e-06
UBE2H	ubiquitin conjugating enzyme E2 H	protein-coding	-1.56	0.0002	0.0032	-1.65	6.26e-06	0.0002
ZMPSTE24	zinc metallopeptidase STE24	protein-coding	-1.56	6.49e-05	0.0016	-1.65	4.54e-06	0.0001
SMIM14	small integral membrane protein 14	protein-coding	-1.6	4.21e-08	7.84e-06	-1.64	6.37e-08	4.98e-06
CENPT	centromere protein T	protein-coding	-1.53	1.14e-05	0.0004	-1.64	7.43e-06	0.0002
OCLNP1	OCLN pseudogene 1	pseudo	-1.67	0.0007	0.0086	-1.64	0.0005	0.0048
LYRM9	LYR motif containing 9	protein-coding	-1.7	2.38e-05	0.0008	-1.64	1.73e-05	0.0004
SEC24A	SEC24 homolog A, COPII coat complex component	protein-coding	-1.6	6.88e-06	0.0003	-1.64	5.29e-06	0.0001
SIPA1L1	signal induced proliferation associated 1 like 1	protein-coding	-1.67	1.83e-07	2.15e-05	-1.64	1.94e-06	6.53e-05
CHPF2	chondroitin polymerizing factor 2	protein-coding	-1.53	1.08e-05	0.0004	-1.63	8.69e-06	0.0002
KPNA5	karyopherin subunit alpha 5	protein-coding	-1.5	4.62e-06	0.0002	-1.63	8.41e-08	6.16e-06
LRRC37A3	leucine rich repeat containing 37 member A3	protein-coding	-1.6	5.93e-05	0.0015	-1.63	9.36e-06	0.0002
MACF1	microtubule actin crosslinking factor 1	protein-coding	-1.53	1.86e-06	0.0001	-1.63	4.34e-08	3.84e-06
MAF	MAF bZIP transcription factor	protein-coding	-1.64	1.47e-05	0.0005	-1.63	0.0002	0.0025
SLC2A3	solute carrier family 2 member 3	protein-coding	-1.53	1.3e-07	1.73e-05	-1.63	4.85e-08	4.18e-06
SNX30	sorting nexin family member 30	protein-coding	-1.57	7.33e-06	0.0003	-1.63	6.03e-06	0.0002
SUMO1P3	SUMO1 pseudogene 3	pseudo	-1.56	1.3e-05	0.0005	-1.63	6.93e-08	5.32e-06
WNT2B	Wnt family member 2B	protein-coding	-1.53	0.0005	0.0069	-1.63	3.35e-05	0.0006
GRK5	G protein-coupled receptor kinase 5	protein-coding	-1.61	0.0001	0.0026	-1.62	0.0001	0.0017
INTS3	integrator complex subunit 3	protein-coding	-1.59	1.14e-05	0.0004	-1.62	4.89e-07	2.27e-05
LAT	linker for activation of T cells	protein-coding	-1.57	4.37e-07	4.07e-05	-1.62	6.56e-07	2.84e-05
LPAR6	lysophosphatidic acid receptor 6	protein-coding	-1.52	1.37e-05	0.0005	-1.62	1.14e-06	4.25e-05
MYH10	myosin heavy chain 10	protein-coding	-1.63	3.95e-05	0.0011	-1.62	0.0003	0.0036
NCL	nucleolin	protein-coding	-1.5	0.0006	0.0075	-1.62	3.59e-05	0.0006
XGY2	XG pseudogene, Y-linked 2	pseudo	-1.52	1.21e-06	8.8e-05	-1.62	8.31e-07	3.38e-05
ZMYND8	zinc finger MYND-type containing 8	protein-coding	-1.54	1.62e-06	0.0001	-1.62	3.33e-07	1.7e-05
CCDC148	coiled-coil domain containing 148	protein-coding	-1.58	4.71e-05	0.0013	-1.61	0.0002	0.0028
CENATAC	centrosomal AT-AC splicing factor	protein-coding	-1.6	3.62e-06	0.0002	-1.61	1.57e-06	5.59e-05
FUBP1	far upstream element binding protein 1	protein-coding	-1.53	5.14e-06	0.0003	-1.61	1.16e-07	7.97e-06
FUS	FUS RNA binding protein	protein-coding	-1.71	8.08e-06	0.0003	-1.61	2.62e-05	0.0005
SCRN3	secernin 3	protein-coding	-1.61	3.1e-06	0.0002	-1.61	8.69e-07	3.45e-05
METTL14	methyltransferase 14, N6-adenosine-methyltransferase subunit	protein-coding	-1.52	0.0002	0.0037	-1.6	1.73e-05	0.0004
RGPD2	RANBP2 like and GRIP domain containing 2	protein-coding	-1.92	2.06e-07	2.34e-05	-1.6	4.06e-05	0.0007
SLC23A2	solute carrier family 23 member 2	protein-coding	-1.53	0.0005	0.007	-1.6	4.87e-05	0.0008
TM9SF2	transmembrane 9 superfamily member 2	protein-coding	-1.55	0.0002	0.0034	-1.6	8.52e-06	0.0002
CFAP44	cilia and flagella associated protein 44	protein-coding	-1.51	0.0002	0.0036	-1.6	2.62e-05	0.0005
DDAH1	dimethylarginine dimethylaminohydrolase 1	protein-coding	-1.5	0.0003	0.0049	-1.59	0.0002	0.0026
GLTP	glycolipid transfer protein	protein-coding	-1.52	2.7e-05	0.0008	-1.59	3.33e-06	9.99e-05
JADE1	jade family PHD finger 1	protein-coding	-1.54	3.97e-05	0.0011	-1.59	3.9e-05	0.0007
SLC12A6	solute carrier family 12 member 6	protein-coding	-1.52	1.36e-05	0.0005	-1.59	7.67e-06	0.0002
SYNE1	spectrin repeat containing nuclear envelope protein 1	protein-coding	-1.53	5.84e-05	0.0015	-1.59	9.31e-06	0.0002
TBC1D2	TBC1 domain family member 2	protein-coding	-1.72	4.03e-05	0.0011	-1.59	0.0003	0.0032
TEP1	telomerase associated protein 1	protein-coding	-1.55	5.64e-07	5.04e-05	-1.59	7.79e-08	5.75e-06
VDAC3	voltage dependent anion channel 3	protein-coding	-1.62	5.86e-06	0.0003	-1.59	1.55e-06	5.54e-05
PIK3C2B	phosphatidylinositol-4-phosphate 3-kinase catalytic subunit type 2 beta	protein-coding	-1.73	6.21e-06	0.0003	-1.58	0.0005	0.0051
POU5F2	POU domain class 5, transcription factor 2	protein-coding	-1.58	6.89e-11	7.55e-08	-1.58	1.82e-10	6.88e-08
RBM39	RNA binding motif protein 39	protein-coding	-1.52	2.79e-07	2.88e-05	-1.58	3.34e-09	6.13e-07
DNAH1	dynein axonemal heavy chain 1	protein-coding	-1.61	6.45e-06	0.0003	-1.57	1.38e-05	0.0003
PSMA3-AS1	PSMA3 antisense RNA 1	ncRNA	-1.5	1.2e-07	1.62e-05	-1.57	3.65e-08	3.4e-06
GCNT4	glucosaminyl (N-acetyl) transferase 4	protein-coding	-1.63	2.4e-06	0.0001	-1.57	1.69e-05	0.0004
L2HGDH	L-2-hydroxyglutarate dehydrogenase	protein-coding	-1.65	1.83e-09	8.11e-07	-1.57	1.07e-07	7.4e-06
LINC00174	long intergenic non-protein coding RNA 174	ncRNA	-1.7	7.41e-09	2.14e-06	-1.57	1.16e-06	4.31e-05
PRMT9	protein arginine methyltransferase 9	protein-coding	-1.57	4.99e-09	1.65e-06	-1.57	4.47e-09	7.26e-07
ZFHX3	zinc finger homeobox 3	protein-coding	-1.54	3.37e-08	6.95e-06	-1.57	3.15e-07	1.62e-05
ARPC1A	actin related protein 2/3 complex subunit 1A	protein-coding	-1.55	5.84e-06	0.0003	-1.56	3.79e-06	0.0001
BMP4	bone morphogenetic protein 4	protein-coding	-1.68	5.99e-05	0.0015	-1.56	0.0006	0.0058
EVC	EvC ciliary complex subunit 1	protein-coding	-1.52	4.34e-05	0.0012	-1.56	9.07e-05	0.0013
ITGB5	integrin subunit beta 5	protein-coding	-1.7	0.0002	0.0035	-1.56	0.0003	0.003
NIT2	nitrilase family member 2	protein-coding	-1.55	6.05e-07	5.35e-05	-1.56	2.34e-07	1.31e-05
PGRMC2	progesterone receptor membrane component 2	protein-coding	-1.58	0.0002	0.0034	-1.56	6.92e-05	0.0011
PLEC	plectin	protein-coding	-1.5	0.0004	0.0063	-1.56	0.0002	0.0022
TMEM87B	transmembrane protein 87B	protein-coding	-1.53	8.51e-05	0.002	-1.56	8.75e-06	0.0002
TRAPPC3	trafficking protein particle complex subunit 3	protein-coding	-1.54	1.62e-05	0.0006	-1.56	3.14e-06	9.58e-05
ZUP1	zinc finger containing ubiquitin peptidase 1	protein-coding	-1.52	2.56e-07	2.75e-05	-1.56	5.02e-08	4.28e-06
AGA	aspartylglucosaminidase	protein-coding	-1.59	5.22e-05	0.0014	-1.55	9.88e-05	0.0014
DONSON	DNA replication fork stabilization factor DONSON	protein-coding	-1.56	2.79e-05	0.0009	-1.55	0.0004	0.0038
LTBP3	latent transforming growth factor beta binding protein 3	protein-coding	-1.58	3.7e-06	0.0002	-1.55	4.72e-05	0.0008
MCU	mitochondrial calcium uniporter	protein-coding	-1.57	3.97e-07	3.84e-05	-1.55	7.02e-06	0.0002
MPC1	mitochondrial pyruvate carrier 1	protein-coding	-1.53	8.83e-07	6.91e-05	-1.55	2.26e-07	1.29e-05
MSANTD2	Myb/SANT DNA binding domain containing 2	protein-coding	-1.54	1.44e-06	9.89e-05	-1.55	9.39e-06	0.0002
SLC35D1	solute carrier family 35 member D1	protein-coding	-1.52	1.84e-06	0.0001	-1.55	4.76e-07	2.23e-05
SLC37A3	solute carrier family 37 member 3	protein-coding	-1.5	8.25e-06	0.0003	-1.55	1.85e-06	6.3e-05
YTHDC2	YTH domain containing 2	protein-coding	-1.53	2.03e-06	0.0001	-1.55	1.75e-05	0.0004
TMEM131L	transmembrane 131 like	protein-coding	-1.65	1.35e-06	9.53e-05	-1.54	1.22e-05	0.0003
KIAA1549L	KIAA1549 like	protein-coding	-1.62	0.0001	0.0028	-1.54	0.0007	0.0063
PLA2G12A	phospholipase A2 group XIIA	protein-coding	-1.59	1.35e-07	1.76e-05	-1.54	7.38e-07	3.08e-05
CRY2	cryptochrome circadian regulator 2	protein-coding	-1.52	0.0001	0.0023	-1.53	2.53e-05	0.0005
GNB4	G protein subunit beta 4	protein-coding	-1.59	1.64e-06	0.0001	-1.53	2.78e-06	8.7e-05
MXRA7	matrix remodeling associated 7	protein-coding	-1.61	9.09e-05	0.0021	-1.53	0.0003	0.003
PMP22	peripheral myelin protein 22	protein-coding	-1.57	0.0002	0.0036	-1.53	0.0002	0.002
ROCK1P1	Rho associated coiled-coil containing protein kinase 1 pseudogene 1	pseudo	-1.55	4.57e-05	0.0013	-1.53	4.92e-05	0.0008
SLC30A7	solute carrier family 30 member 7	protein-coding	-1.54	5.58e-10	3.32e-07	-1.53	1.09e-09	2.84e-07
ANKRD20A9P	ankyrin repeat domain 20 family member A9, pseudogene	pseudo	-1.53	7.68e-05	0.0018	-1.52	0.0001	0.0018
CERCAM	cerebral endothelial cell adhesion molecule	protein-coding	-1.53	0.0005	0.0073	-1.52	0.0012	0.0097
GPATCH4	G-patch domain containing 4	protein-coding	-1.53	2.4e-06	0.0001	-1.52	8.46e-06	0.0002
METTL21A	methyltransferase 21A, HSPA lysine	protein-coding	-1.54	3.25e-05	0.001	-1.52	2.68e-05	0.0005
PTPRA	protein tyrosine phosphatase receptor type A	protein-coding	-1.55	9.18e-05	0.0021	-1.52	5.87e-05	0.0009
BICD1	BICD cargo adaptor 1	protein-coding	-1.5	6.03e-06	0.0003	-1.51	4.12e-05	0.0007
GK5	glycerol kinase 5	protein-coding	-1.55	3.54e-07	3.49e-05	-1.51	2.02e-06	6.7e-05
SNORA55	small nucleolar RNA, H/ACA box 55	snoRNA	-1.57	5.41e-06	0.0003	-1.51	2.32e-05	0.0005
STARD4	StAR related lipid transfer domain containing 4	protein-coding	-1.53	0.0004	0.0055	-1.51	0.0007	0.0066
STK39	serine/threonine kinase 39	protein-coding	-1.63	5.59e-06	0.0003	-1.51	0.0001	0.0016
TOMM7	translocase of outer mitochondrial membrane 7	protein-coding	-1.57	4.39e-07	4.07e-05	-1.51	2.38e-06	7.64e-05
B4GALT4	beta-1,4-galactosyltransferase 4	protein-coding	-1.51	1.47e-05	0.0005	-1.5	0.0002	0.0026

## Sheet: 132 DEGs hEDS only
132 DEGs present only in hEDS vs control
Gene Symbol	GENENAME	GENETYPE	Fold Change_hEDS vs control	uncorrected p-value ≤0.01	FDR P-val 1%	Fold Change_HSD vs control	uncorrected p-value ≤0.01	FDR-adjusted p-value ≤0.01
CXCL8	C-X-C motif chemokine ligand 8	protein-coding	4.51	6.92e-05	0.0017	2.72	0.0085	0.0432
CYP7B1	cytochrome P450 family 7 subfamily B member 1	protein-coding	3.79	1.54e-05	0.0005	2.19	0.0074	0.0393
MDFI	MyoD family inhibitor	protein-coding	2.88	0.0007	0.0085	2.17	0.0074	0.0394
APOE	apolipoprotein E	protein-coding	2.85	0.0002	0.0037	2.28	0.0029	0.0193
GBP5	guanylate binding protein 5	protein-coding	2.76	2.87e-06	0.0002	1.88	0.0026	0.0175
TNFAIP6	TNF alpha induced protein 6	protein-coding	2.62	0.0003	0.0051	2.14	0.008	0.0416
IL32	interleukin 32	protein-coding	2.61	0.0003	0.0051	2.17	0.0046	0.0271
WWC1	WW and C2 domain containing 1	protein-coding	2.39	0.0001	0.0026	2.27	0.0014	0.011
SALL1	spalt like transcription factor 1	protein-coding	2.17	8.11e-06	0.0003	1.72	0.0018	0.013
CRYBG1	crystallin beta-gamma domain containing 1	protein-coding	2.14	0.0005	0.0073	2	0.0067	0.0364
QPRT	quinolinate phosphoribosyltransferase	protein-coding	2.13	7.83e-05	0.0019	1.96	0.0017	0.0129
CTSS	cathepsin S	protein-coding	1.98	9.78e-05	0.0021	1.43	0.0216	0.0875
TRIM16L	tripartite motif containing 16 like	pseudo	1.96	5.45e-05	0.0014	1.64	0.0025	0.017
CYP1B1	cytochrome P450 family 1 subfamily B member 1	protein-coding	1.91	0.0003	0.0051	1.26	0.0467	0.1554
EPB41L3	erythrocyte membrane protein band 4.1 like 3	protein-coding	1.89	6.02e-05	0.0015	1.54	0.0077	0.0404
CCL5	C-C motif chemokine ligand 5	protein-coding	1.85	0.0001	0.0023	1.86	0.0026	0.0172
AKR1B1	aldo-keto reductase family 1 member B	protein-coding	1.83	2.88e-08	6.2e-06	1.44	6.41e-05	0.001
PF4V1	platelet factor 4 variant 1	protein-coding	1.83	0.0004	0.0054	1.71	0.0016	0.0121
MT1E	metallothionein 1E	protein-coding	1.78	2.48e-05	0.0008	1.59	0.0018	0.013
S100A2	S100 calcium binding protein A2	protein-coding	1.77	0.0006	0.0076	1.5	0.0029	0.019
CH25H	cholesterol 25-hydroxylase	protein-coding	1.75	0.0006	0.0082	1.36	0.0395	0.1377
H2BC10	H2B clustered histone 10	protein-coding	1.74	0.0006	0.0082	1.94	0.0027	0.0179
CD40	CD40 molecule	protein-coding	1.73	7.85e-05	0.0019	1.61	0.002	0.0142
CSF3	colony stimulating factor 3	protein-coding	1.73	0.0002	0.0032	1.53	0.0046	0.0271
PMAIP1	phorbol-12-myristate-13-acetate-induced protein 1	protein-coding	1.73	4.16e-05	0.0012	1.48	0.0011	0.009
SRPX	sushi repeat containing protein X-linked	protein-coding	1.73	0.0005	0.0071	1.6	0.0039	0.0236
HS3ST3B1	heparan sulfate-glucosamine 3-sulfotransferase 3B1	protein-coding	1.7	5.64e-05	0.0015	1.43	0.0013	0.0103
SLC6A15	solute carrier family 6 member 15	protein-coding	1.7	6.36e-05	0.0016	1.24	0.066	0.1996
PLTP	phospholipid transfer protein	protein-coding	1.69	0.0001	0.0023	1.5	0.0029	0.0192
OR2A20P	olfactory receptor family 2 subfamily A member 20 pseudogene	pseudo	1.68	0.0002	0.003	1.26	0.047	0.156
SLC43A3	solute carrier family 43 member 3	protein-coding	1.66	0.0008	0.0097	1.34	0.0253	0.0987
TNFRSF1B	TNF receptor superfamily member 1B	protein-coding	1.66	0.0003	0.0048	1.47	0.0069	0.0372
H1-4	H1.4 linker histone, cluster member	protein-coding	1.65	0.0002	0.0036	1.44	0.0041	0.0247
ZNF22	zinc finger protein 22	protein-coding	1.65	3.43e-09	1.29e-06	1.48	6.21e-06	0.0002
ACSS3	acyl-CoA synthetase short chain family member 3	protein-coding	1.64	0.0005	0.0068	1.34	0.0581	0.1817
ADM	adrenomedullin	protein-coding	1.63	0.0007	0.009	1.37	0.081	0.2304
AFF2	AF4/FMR2 family member 2	protein-coding	1.63	0.0007	0.0089	1.24	0.1105	0.2842
RPS6KA1	ribosomal protein S6 kinase A1	protein-coding	1.63	2.89e-08	6.2e-06	1.37	0.0002	0.0024
RUNX2	RUNX family transcription factor 2	protein-coding	1.62	0.0003	0.0043	1.38	0.0026	0.0176
LINC01426	long intergenic non-protein coding RNA 1426	ncRNA	1.61	7.74e-05	0.0018	1.47	0.001	0.0083
NDRG2	NDRG family member 2	protein-coding	1.61	0.0006	0.0081	1.46	0.0159	0.0699
ARAP3	ArfGAP with RhoGAP domain, ankyrin repeat and PH domain 3	protein-coding	1.6	7.69e-07	6.3e-05	1.4	0.0004	0.0042
ADGRG1	adhesion G protein-coupled receptor G1	protein-coding	1.6	0.0007	0.0088	1.52	0.0048	0.028
LIMD2	LIM domain containing 2	protein-coding	1.58	0.0006	0.008	1.38	0.0161	0.0705
MMD	monocyte to macrophage differentiation associated	protein-coding	1.58	2.41e-05	0.0008	1.43	0.0017	0.0124
DMC1	DNA meiotic recombinase 1	protein-coding	1.57	0.0001	0.0027	1.49	0.0032	0.0205
ARHGAP24	Rho GTPase activating protein 24	protein-coding	1.56	0.0006	0.0077	1.33	0.0265	0.102
COL27A1	collagen type XXVII alpha 1 chain	protein-coding	1.56	0.0002	0.0033	1.37	0.0156	0.0687
HS6ST1	heparan sulfate 6-O-sulfotransferase 1	protein-coding	1.56	0.0005	0.0067	1.41	0.0106	0.0514
PLIN2	perilipin 2	protein-coding	1.55	6.31e-05	0.0016	1.29	0.0136	0.0621
TNIP3	TNFAIP3 interacting protein 3	protein-coding	1.55	0.0002	0.0039	1.33	0.0411	0.1417
BMP2	bone morphogenetic protein 2	protein-coding	1.54	6.03e-05	0.0015	1.36	0.0107	0.0518
EMP2	epithelial membrane protein 2	protein-coding	1.52	0.0001	0.0024	1.49	0.0006	0.0055
CHORDC1P4	CHORDC1 pseudogene 4	pseudo	-1.5	7.97e-07	6.46e-05	-1.35	1.98e-05	0.0004
MORF4L2	mortality factor 4 like 2	protein-coding	-1.5	0.0001	0.0023	-1.37	0.0011	0.009
AK2	adenylate kinase 2	protein-coding	-1.51	0.0006	0.0075	-1.49	0.0001	0.0019
AMZ1	archaelysin family metallopeptidase 1	protein-coding	-1.51	0.0008	0.0095	-1.29	0.0454	0.1521
MICU3	mitochondrial calcium uptake family member 3	protein-coding	-1.51	5.58e-05	0.0014	-1.3	0.0002	0.0022
HLX	H2.0 like homeobox	protein-coding	-1.51	0.0007	0.0084	-1.39	0.0018	0.0133
MAFK	MAF bZIP transcription factor K	protein-coding	-1.51	9.27e-07	7.12e-05	-1.46	6.1e-05	0.001
OSBPL3	oxysterol binding protein like 3	protein-coding	-1.51	7.87e-05	0.0019	-1.45	0.0003	0.0032
P2RX5	purinergic receptor P2X 5	protein-coding	-1.51	0.0003	0.0047	-1.45	0.005	0.029
TRAPPC4	trafficking protein particle complex subunit 4	protein-coding	-1.51	0.0001	0.0028	-1.46	0.0003	0.0035
FBN1	fibrillin 1	protein-coding	-1.52	4.12e-08	7.84e-06	-1.4	9.56e-06	0.0002
MST1	macrophage stimulating 1	protein-coding	-1.52	8.03e-05	0.0019	-1.46	0.0002	0.0024
UNC13A	unc-13 homolog A	protein-coding	-1.52	0.0006	0.0074	-1.52	0.0061	0.0339
VTI1A	vesicle transport through interaction with t-SNAREs 1A	protein-coding	-1.52	5.77e-06	0.0003	-1.47	4.61e-07	2.18e-05
CBX5	chromobox 5	protein-coding	-1.53	2.89e-05	0.0009	-1.49	2e-06	6.68e-05
DDR1	discoidin domain receptor tyrosine kinase 1	protein-coding	-1.53	4.14e-05	0.0012	-1.44	0.0022	0.0155
EXTL1	exostosin like glycosyltransferase 1	protein-coding	-1.53	0.0006	0.008	-1.47	0.0035	0.0217
XNDC1N	XRCC1 N-terminal domain containing 1, N-terminal like	protein-coding	-1.54	9.12e-07	7.06e-05	-1.42	4.41e-05	0.0008
MAP1A	microtubule associated protein 1A	protein-coding	-1.54	9.36e-06	0.0004	-1.45	5.54e-05	0.0009
TRPM4	transient receptor potential cation channel subfamily M member 4	protein-coding	-1.54	8.77e-09	2.4e-06	-1.5	5.35e-07	2.45e-05
ZFHX2	zinc finger homeobox 2	protein-coding	-1.54	3.36e-05	0.001	-1.42	0.0003	0.0033
CFAP298	cilia and flagella associated protein 298	protein-coding	-1.55	1.03e-05	0.0004	-1.45	6.05e-05	0.001
PRR34-AS1	PRR34 antisense RNA 1	ncRNA	-1.55	1.31e-05	0.0005	-1.37	0.0003	0.0037
HPS5	HPS5 biogenesis of lysosomal organelles complex 2 subunit 2	protein-coding	-1.56	6.12e-09	1.87e-06	-1.45	7.36e-07	3.08e-05
JUND	JunD proto-oncogene, AP-1 transcription factor subunit	protein-coding	-1.56	7.71e-08	1.26e-05	-1.45	3.42e-05	0.0006
LOX	lysyl oxidase	protein-coding	-1.56	0.0001	0.0028	-1.55	0.0025	0.0171
FOXD2-AS1	FOXD2 adjacent opposite strand RNA 1	ncRNA	-1.57	1.82e-07	2.15e-05	-1.41	0.0001	0.0016
HTT	huntingtin	protein-coding	-1.57	1.11e-05	0.0004	-1.49	7.69e-06	0.0002
MAP3K14	mitogen-activated protein kinase kinase kinase 14	protein-coding	-1.57	4.55e-05	0.0012	-1.45	0.001	0.0085
HHIP	hedgehog interacting protein	protein-coding	-1.58	3.5e-05	0.001	-1.46	0.0005	0.0046
AXIN2	axin 2	protein-coding	-1.59	0.0004	0.006	-1.56	0.0015	0.0116
DMD	dystrophin	protein-coding	-1.59	0.0002	0.0034	-1.45	0.0013	0.0102
KCNK6	potassium two pore domain channel subfamily K member 6	protein-coding	-1.59	0.0002	0.0037	-1.46	0.0039	0.0239
RAPH1	Ras association (RalGDS/AF-6) and pleckstrin homology domains 1	protein-coding	-1.59	0.0006	0.0075	-1.59	0.0054	0.0306
SLC25A4	solute carrier family 25 member 4	protein-coding	-1.59	0.0002	0.0041	-1.47	0.0042	0.0253
SLC29A1	solute carrier family 29 member 1 (Augustine blood group)	protein-coding	-1.59	0.0007	0.0087	-1.52	0.002	0.0144
CORO6	coronin 6	protein-coding	-1.6	3.99e-06	0.0002	-1.38	0.0005	0.0049
RANBP17	RAN binding protein 17	protein-coding	-1.6	0.0008	0.0096	-1.11	0.2893	0.5284
RHOB	ras homolog family member B	protein-coding	-1.63	0.0005	0.0073	-1.65	0.0035	0.0218
TNNC2	troponin C2, fast skeletal type	protein-coding	-1.65	0.0001	0.0023	-1.52	0.004	0.0245
PAPSS2	3'-phosphoadenosine 5'-phosphosulfate synthase 2	protein-coding	-1.67	0.0006	0.0076	-1.55	0.0023	0.0159
TMEM178B	transmembrane protein 178B	protein-coding	-1.67	7.44e-05	0.0018	-1.36	0.0195	0.081
FOXC1	forkhead box C1	protein-coding	-1.68	0.0005	0.0065	-1.55	0.0225	0.0901
ATP10A	ATPase phospholipid transporting 10A (putative)	protein-coding	-1.69	0.0001	0.0028	-1.63	0.0021	0.0147
DCLK2	doublecortin like kinase 2	protein-coding	-1.69	0.0001	0.0029	-1.51	0.0016	0.0123
LINC01018	long intergenic non-protein coding RNA 1018	ncRNA	-1.75	0.0007	0.0089	-1.52	0.0024	0.0165
CARMIL1	capping protein regulator and myosin 1 linker 1	protein-coding	-1.75	1.4e-06	9.68e-05	-1.47	0.0002	0.0027
RHPN2	rhophilin Rho GTPase binding protein 2	protein-coding	-1.75	3.14e-05	0.0009	-1.54	0.0017	0.0127
KAZALD1	Kazal type serine peptidase inhibitor domain 1	protein-coding	-1.76	0.0003	0.0051	-1.75	0.0052	0.0301
NEDD9	neural precursor cell expressed, developmentally down-regulated 9	protein-coding	-1.76	0.0003	0.005	-1.67	0.0015	0.0116
NGEF	neuronal guanine nucleotide exchange factor	protein-coding	-1.76	0.0003	0.0051	-1.69	0.0046	0.027
LINC01013	long intergenic non-protein coding RNA 1013	ncRNA	-1.79	0.0004	0.006	-1.37	0.0263	0.1018
SNORA46	small nucleolar RNA, H/ACA box 46	snoRNA	-1.81	0.0008	0.0099	-1.17	0.0839	0.236
ANXA3	annexin A3	protein-coding	-1.82	4.76e-05	0.0013	-1.56	0.002	0.0142
RGPD1	RANBP2 like and GRIP domain containing 1	protein-coding	-1.83	0.0002	0.0039	-1.76	0.0019	0.014
HRCT1	histidine rich carboxyl terminus 1	protein-coding	-1.86	0.0002	0.0035	-1.66	0.0021	0.015
DBNDD2	dysbindin domain containing 2	protein-coding	-1.91	7.07e-06	0.0003	-1.53	0.0013	0.01
SULF2	sulfatase 2	protein-coding	-1.93	0.0007	0.0085	-1.79	0.0033	0.0209
OSR2	odd-skipped related transciption factor 2	protein-coding	-1.96	0.0004	0.0063	-1.99	0.0037	0.0226
ATF3	activating transcription factor 3	protein-coding	-1.97	0.0001	0.0023	-1.77	0.0033	0.0209
STK32B	serine/threonine kinase 32B	protein-coding	-1.97	0.0004	0.0054	-1.67	0.0151	0.0672
SPINT2	serine peptidase inhibitor, Kunitz type 2	protein-coding	-1.98	0.0008	0.0099	-1.53	0.0229	0.0915
LYPD6	LY6/PLAUR domain containing 6	protein-coding	-2	0.0008	0.0096	-1.7	0.0277	0.1058
FOXE1	forkhead box E1	protein-coding	-2.01	0.0003	0.0043	-1.76	0.0048	0.0279
ABLIM1	actin binding LIM protein 1	protein-coding	-2.17	0.0006	0.0076	-1.69	0.0138	0.0627
SAMD3	sterile alpha motif domain containing 3	protein-coding	-2.2	2.01e-05	0.0007	-1.92	0.0016	0.0123
PCSK6	proprotein convertase subtilisin/kexin type 6	protein-coding	-2.23	0.0006	0.0081	-1.64	0.0079	0.0413
LYPD6B	LY6/PLAUR domain containing 6B	protein-coding	-2.35	0.0003	0.0053	-2.14	0.0073	0.0387
GDF6	growth differentiation factor 6	protein-coding	-2.38	2.73e-05	0.0008	-1.76	0.0061	0.0338
TENM3-AS1	TENM3 antisense RNA 1	ncRNA	-2.45	0.0003	0.0048	-2.14	0.0034	0.0212
ANKRD1	ankyrin repeat domain 1	protein-coding	-2.46	0.0002	0.0036	-2.32	0.0022	0.0153
MEST	mesoderm specific transcript	protein-coding	-2.6	0.0004	0.0063	-2.02	0.0138	0.0627
IGFBP5	insulin like growth factor binding protein 5	protein-coding	-2.62	0.0002	0.0035	-2.44	0.0014	0.0107
ADAMTSL1	ADAMTS like 1	protein-coding	-2.79	0.0006	0.0084	-2.81	0.0016	0.0122
CRLF1	cytokine receptor like factor 1	protein-coding	-2.92	0.0001	0.0028	-2.43	0.004	0.0242
TENM3	teneurin transmembrane protein 3	protein-coding	-2.94	0.0005	0.0065	-2.55	0.0028	0.0184
LHX9	LIM homeobox 9	protein-coding	-3.02	1.61e-05	0.0006	-2.9	0.0017	0.0128
NTN4	netrin 4	protein-coding	-3.35	0.0004	0.006	-2.65	0.0083	0.0424
PAX8-AS1	PAX8 antisense RNA 1	ncRNA	-4.77	0.0006	0.0076	-4.46	0.0023	0.0159

## Sheet: 584 DEGs HSD only
584 DEGs present only in HSD vs control
Gene Symbol	GENENAME	GENETYPE	Fold Change HSD vs control	P-val	FDR-adjusted p-value ≤0.01	Fold Change hEDS vs control	uncorrected p-value ≤0.01	FDR P-val 1%
MALL	mal, T cell differentiation protein like	protein-coding	-3.63	0.0001	0.0019	-2.82	0.0019	0.0178
CDH6	cadherin 6	protein-coding	-3.47	0.0003	0.0033	-2.1	0.0067	0.0443
POSTN	periostin	protein-coding	-3.38	0.0008	0.0073	-2.9	0.0017	0.0168
SLC38A4	solute carrier family 38 member 4	protein-coding	-2.71	0.001	0.0084	-2.1	0.0094	0.0565
TRPC4	transient receptor potential cation channel subfamily C member 4	protein-coding	-2.67	5.17e-05	0.0009	-1.8	0.0038	0.0299
MID1	midline 1	protein-coding	-2.53	1e-05	0.0002	-1.64	0.0011	0.012
PDE5A	phosphodiesterase 5A	protein-coding	-2.53	9.65e-05	0.0014	-1.84	0.005	0.0359
CREBRF	CREB3 regulatory factor	protein-coding	-2.4	9.03e-07	3.55e-05	-1.52	0.0039	0.0305
USP32P2	ubiquitin specific peptidase 32 pseudogene 2	pseudo	-2.4	0.0006	0.0057	-1.39	0.081	0.2451
ANGPTL1	angiopoietin like 1	protein-coding	-2.27	0.0007	0.0065	-1.5	0.0127	0.0695
OLR1	oxidized low density lipoprotein receptor 1	protein-coding	-2.27	0.0001	0.0019	-1.85	0.0013	0.0135
LAMA3	laminin subunit alpha 3	protein-coding	-2.18	0.0002	0.0028	-1.57	0.014	0.0745
MGARP	mitochondria localized glutamic acid rich protein	protein-coding	-2.18	0.0004	0.0041	-1.76	0.007	0.0459
ABCA6	ATP binding cassette subfamily A member 6	protein-coding	-2.16	0.0002	0.0026	-1.54	0.0051	0.0365
FER1L4	fer-1 like family member 4 (pseudogene)	pseudo	-2.16	0.0001	0.0016	-1.77	0.0039	0.0304
ZMAT3	zinc finger matrin-type 3	protein-coding	-2.13	8.98e-05	0.0013	-1.62	0.0022	0.0201
LOC392196	ubiquitin specific peptidase 17 like family member 2 pseudogene	pseudo	-2.1	5.08e-05	0.0008	-1.52	0.0073	0.0473
LRRC2	leucine rich repeat containing 2	protein-coding	-2.1	0.0002	0.0028	-1.91	0.001	0.0117
SAMD12	sterile alpha motif domain containing 12	protein-coding	-2.08	0.0001	0.0017	-1.74	0.0009	0.0104
AHNAK2	AHNAK nucleoprotein 2	protein-coding	-2.07	0.001	0.0086	-1.8	0.0013	0.0136
ZEB1	zinc finger E-box binding homeobox 1	protein-coding	-2.04	1e-06	3.85e-05	-1.49	0.0019	0.018
TMTC3	transmembrane O-mannosyltransferase targeting cadherins 3	protein-coding	-2.02	7.31e-06	0.0002	-1.51	0.004	0.0308
COLGALT2	collagen beta(1-O)galactosyltransferase 2	protein-coding	-2.01	0.0008	0.0071	-1.39	0.0354	0.1419
KIF5B	kinesin family member 5B	protein-coding	-1.99	1.58e-05	0.0003	-1.59	0.0038	0.03
HSPA4L	heat shock protein family A (Hsp70) member 4 like	protein-coding	-1.98	0.0006	0.0054	-1.49	0.01	0.0589
TMTC2	transmembrane O-mannosyltransferase targeting cadherins 2	protein-coding	-1.98	0.0011	0.0089	-1.64	0.0044	0.0328
MAGI2	membrane associated guanylate kinase, WW and PDZ domain containing 2	protein-coding	-1.95	2.22e-05	0.0004	-1.42	0.0034	0.0279
VEPH1	ventricular zone expressed PH domain containing 1	protein-coding	-1.93	0.0007	0.0064	-1.77	0.0021	0.019
CCNL1	cyclin L1	protein-coding	-1.92	7.56e-05	0.0011	-1.59	0.0027	0.0235
ARRDC3	arrestin domain containing 3	protein-coding	-1.9	0.0003	0.0034	-1.39	0.0076	0.0483
CTR9	CTR9 homolog, Paf1/RNA polymerase II complex component	protein-coding	-1.89	1.94e-07	1.16e-05	-1.49	0.0005	0.0068
EID3	EP300 interacting inhibitor of differentiation 3	protein-coding	-1.89	5.54e-06	0.0002	-1.59	0.0011	0.0117
ZNF638	zinc finger protein 638	protein-coding	-1.89	2.16e-08	2.37e-06	-1.46	0.0011	0.012
IFIT2	interferon induced protein with tetratricopeptide repeats 2	protein-coding	-1.88	0.001	0.0085	-1.72	0.0048	0.0353
MYO1E	myosin IE	protein-coding	-1.88	0.0005	0.0046	-1.64	0.0052	0.0373
DYNC2H1	dynein cytoplasmic 2 heavy chain 1	protein-coding	-1.87	2.33e-06	7.52e-05	-1.38	0.0061	0.0417
KLF9	Kruppel like factor 9	protein-coding	-1.87	0.0003	0.003	-1.59	0.0012	0.0124
MDM2	MDM2 proto-oncogene	protein-coding	-1.87	3.58e-06	0.0001	-1.56	0.0013	0.0137
NFIA	nuclear factor I A	protein-coding	-1.87	0.0003	0.003	-1.59	0.0019	0.0179
RAD17	RAD17 checkpoint clamp loader component	protein-coding	-1.87	8.39e-09	1.1e-06	-1.48	0.0001	0.0025
REV3L	REV3 like, DNA directed polymerase zeta catalytic subunit	protein-coding	-1.87	0.0009	0.0078	-1.23	0.1206	0.3184
TAOK1	TAO kinase 1	protein-coding	-1.87	1.43e-09	3.39e-07	-1.41	9.02e-05	0.002
VPS13C	vacuolar protein sorting 13 homolog C	protein-coding	-1.87	1.04e-07	7.21e-06	-1.49	0.0005	0.0071
ANKRD33B	ankyrin repeat domain 33B	protein-coding	-1.86	0.0005	0.0049	-1.45	0.0062	0.042
CERT1	ceramide transporter 1	protein-coding	-1.86	1.6e-07	1.02e-05	-1.48	6.04e-05	0.0015
C1GALT1	core 1 synthase, glycoprotein-N-acetylgalactosamine 3-beta-galactosyltransferase 1	protein-coding	-1.85	2.24e-07	1.29e-05	-1.42	7.5e-05	0.0018
MEIS2	Meis homeobox 2	protein-coding	-1.85	9.27e-05	0.0013	-1.33	0.0331	0.1352
POLK	DNA polymerase kappa	protein-coding	-1.85	1.79e-08	2.03e-06	-1.48	3.64e-05	0.0011
RUFY3	RUN and FYVE domain containing 3	protein-coding	-1.85	6.39e-08	4.98e-06	-1.49	0.0002	0.0037
ADAM10	ADAM metallopeptidase domain 10	protein-coding	-1.84	8.26e-07	3.37e-05	-1.4	0.0006	0.0082
OSBPL8	oxysterol binding protein like 8	protein-coding	-1.84	0.0002	0.0028	-1.34	0.1175	0.3134
LRRK2	leucine rich repeat kinase 2	protein-coding	-1.83	0.0004	0.0044	-1.61	0.005	0.0362
IGIP	IgA inducing protein	protein-coding	-1.81	5.85e-08	4.68e-06	-1.49	6.09e-05	0.0015
MALAT1	metastasis associated lung adenocarcinoma transcript 1	ncRNA	-1.81	3.4e-06	0.0001	-1.57	0.0009	0.0106
PDCD4	programmed cell death 4	protein-coding	-1.81	1.35e-08	1.6e-06	-1.45	3.53e-05	0.001
SMS	spermine synthase	protein-coding	-1.81	9.13e-05	0.0013	-1.52	0.0011	0.0119
ZNF480	zinc finger protein 480	protein-coding	-1.81	1.43e-07	9.32e-06	-1.42	0.0001	0.0026
CD109	CD109 molecule	protein-coding	-1.8	8.24e-05	0.0012	-1.37	0.0226	0.1039
HSF4	heat shock transcription factor 4	protein-coding	-1.8	1.32e-05	0.0003	-1.27	0.0563	0.193
CEP162	centrosomal protein 162	protein-coding	-1.8	4.59e-05	0.0008	-1.25	0.0141	0.0747
ZNF160	zinc finger protein 160	protein-coding	-1.8	2.86e-11	1.75e-08	-1.46	3.46e-07	3.43e-05
IFT80	intraflagellar transport 80	protein-coding	-1.78	2.7e-07	1.45e-05	-1.24	0.0077	0.0491
LOC100190986	uncharacterized LOC100190986	ncRNA	-1.78	0.0005	0.0048	-1.59	0.0067	0.0447
TIPARP	TCDD inducible poly(ADP-ribose) polymerase	protein-coding	-1.78	0.0009	0.0078	-1.42	0.0144	0.0761
CLIP3	CAP-Gly domain containing linker protein 3	protein-coding	-1.77	2.53e-06	8.07e-05	-1.49	8.11e-05	0.0019
HECTD2	HECT domain E3 ubiquitin protein ligase 2	protein-coding	-1.77	2.45e-06	7.84e-05	-1.37	0.0033	0.0272
MED13L	mediator complex subunit 13L	protein-coding	-1.77	4.67e-07	2.2e-05	-1.49	9.05e-05	0.002
MLH3	mutL homolog 3	protein-coding	-1.77	7.71e-07	3.2e-05	-1.36	0.0046	0.0341
NPAT	nuclear protein, coactivator of histone transcription	protein-coding	-1.77	9.15e-08	6.57e-06	-1.42	0.0002	0.0041
SASS6	SAS-6 centriolar assembly protein	protein-coding	-1.77	7.96e-05	0.0012	-1.44	0.0006	0.0079
TBC1D3	TBC1 domain family member 3	protein-coding	-1.77	3.43e-09	6.13e-07	-1.45	1.38e-06	9.59e-05
TP53INP1	tumor protein p53 inducible nuclear protein 1	protein-coding	-1.77	0.0001	0.0018	-1.43	0.0008	0.0101
ZC3H7A	zinc finger CCCH-type containing 7A	protein-coding	-1.77	3.8e-09	6.43e-07	-1.46	2.57e-06	0.0001
APLP2	amyloid beta precursor like protein 2	protein-coding	-1.76	0.0007	0.0061	-1.39	0.0163	0.0829
CHN2	chimerin 2	protein-coding	-1.76	0.0007	0.006	-1.76	0.0011	0.0122
EXPH5	exophilin 5	protein-coding	-1.76	0.0009	0.0078	-1.55	0.0022	0.0198
HLTF	helicase like transcription factor	protein-coding	-1.76	7.88e-06	0.0002	-1.34	0.0089	0.0542
PATJ	PATJ crumbs cell polarity complex component	protein-coding	-1.76	0.0002	0.0027	-1.48	0.0294	0.1252
PER3	period circadian regulator 3	protein-coding	-1.76	9.97e-05	0.0014	-1.44	0.0061	0.0417
SGCB	sarcoglycan beta	protein-coding	-1.76	5.33e-05	0.0009	-1.61	0.0011	0.0119
ZFHX4	zinc finger homeobox 4	protein-coding	-1.76	0.0011	0.0091	-1.51	0.0099	0.0584
CAPZA2	capping actin protein of muscle Z-line subunit alpha 2	protein-coding	-1.75	4.26e-05	0.0007	-1.59	0.0011	0.0121
METAP2	methionyl aminopeptidase 2	protein-coding	-1.75	2.66e-07	1.44e-05	-1.35	0.0012	0.0125
PLEKHA5	pleckstrin homology domain containing A5	protein-coding	-1.75	0.0002	0.0026	-1.22	0.0519	0.1833
RGPD6	RANBP2 like and GRIP domain containing 6	protein-coding	-1.75	1e-09	2.71e-07	-1.4	5.48e-05	0.0014
SNORA58	small nucleolar RNA, H/ACA box 58	snoRNA	-1.75	1.56e-07	9.98e-06	-1.49	8.62e-05	0.002
ATP13A3	ATPase 13A3	protein-coding	-1.74	2.36e-05	0.0005	-1.54	0.0009	0.0103
NEDD1	NEDD1 gamma-tubulin ring complex targeting factor	protein-coding	-1.74	1e-06	3.85e-05	-1.43	0.0005	0.0065
PRPF39	pre-mRNA processing factor 39	protein-coding	-1.74	5.61e-09	8.53e-07	-1.42	4.53e-05	0.0012
VPS41	VPS41 subunit of HOPS complex	protein-coding	-1.74	8.4e-09	1.1e-06	-1.48	1.27e-05	0.0005
WIPF1	WAS/WASL interacting protein family member 1	protein-coding	-1.74	0.0002	0.0022	-1.53	0.002	0.0185
AASS	aminoadipate-semialdehyde synthase	protein-coding	-1.73	5.48e-08	4.48e-06	-1.44	2.57e-05	0.0008
CCNT1	cyclin T1	protein-coding	-1.73	9.23e-08	6.6e-06	-1.47	1.4e-05	0.0005
DAAM1	dishevelled associated activator of morphogenesis 1	protein-coding	-1.73	1.55e-06	5.54e-05	-1.48	0.0002	0.0034
DMTF1	cyclin D binding myb like transcription factor 1	protein-coding	-1.73	2.6e-06	8.27e-05	-1.47	0.0013	0.0134
JMY	junction mediating and regulatory protein, p53 cofactor	protein-coding	-1.73	8.59e-08	6.27e-06	-1.49	1.33e-05	0.0005
TYW3	tRNA-yW synthesizing protein 3 homolog	protein-coding	-1.73	1.49e-07	9.59e-06	-1.44	6.02e-05	0.0015
ATP11C	ATPase phospholipid transporting 11C	protein-coding	-1.72	9.61e-08	6.8e-06	-1.42	0.0002	0.0033
CREB1	cAMP responsive element binding protein 1	protein-coding	-1.72	3.79e-08	3.42e-06	-1.34	0.0002	0.004
CYBRD1	cytochrome b reductase 1	protein-coding	-1.72	0.0001	0.0019	-1.49	0.0007	0.0085
IFNE	interferon epsilon	protein-coding	-1.72	0.0003	0.0033	-1.42	0.0062	0.0421
RUFY2	RUN and FYVE domain containing 2	protein-coding	-1.72	1.43e-09	3.39e-07	-1.49	9.27e-06	0.0004
TMEM106B	transmembrane protein 106B	protein-coding	-1.72	6.17e-06	0.0002	-1.38	0.0016	0.0157
TNFRSF25	TNF receptor superfamily member 25	protein-coding	-1.72	3.67e-05	0.0007	-1.49	0.0003	0.005
TNIK	TRAF2 and NCK interacting kinase	protein-coding	-1.72	0.0007	0.0061	-1.43	0.0418	0.1584
ADHFE1	alcohol dehydrogenase iron containing 1	protein-coding	-1.71	4.63e-06	0.0001	-1.41	0.0007	0.0085
ATP5IF1	ATP synthase inhibitory factor subunit 1	protein-coding	-1.71	6e-07	2.69e-05	-1.48	2.75e-05	0.0009
RASA1	RAS p21 protein activator 1	protein-coding	-1.71	9.85e-08	6.93e-06	-1.44	0.0001	0.0022
RBM25	RNA binding motif protein 25	protein-coding	-1.71	3.51e-09	6.14e-07	-1.47	4.93e-05	0.0013
REL	REL proto-oncogene, NF-kB subunit	protein-coding	-1.71	4.18e-09	6.91e-07	-1.48	3.44e-06	0.0002
SLC6A6	solute carrier family 6 member 6	protein-coding	-1.71	0.0008	0.0068	-1.57	0.0041	0.0312
ZNF91	zinc finger protein 91	protein-coding	-1.71	8.69e-07	3.45e-05	-1.42	0.0004	0.0054
AGL	amylo-alpha-1, 6-glucosidase, 4-alpha-glucanotransferase	protein-coding	-1.7	1.71e-06	5.94e-05	-1.45	0.0005	0.0067
DIAPH3	diaphanous related formin 3	protein-coding	-1.7	0.0007	0.0067	-1.55	0.002	0.0185
DNAJB14	DnaJ heat shock protein family (Hsp40) member B14	protein-coding	-1.7	7.23e-08	5.45e-06	-1.37	0.0008	0.0097
ERLEC1	endoplasmic reticulum lectin 1	protein-coding	-1.7	2.01e-09	4.36e-07	-1.47	3.64e-06	0.0002
FAM3C	FAM3 metabolism regulating signaling molecule C	protein-coding	-1.7	1.13e-06	4.21e-05	-1.45	7.72e-05	0.0018
HSD17B12	hydroxysteroid 17-beta dehydrogenase 12	protein-coding	-1.7	2.53e-09	5.17e-07	-1.49	1.19e-07	1.62e-05
KCTD9	potassium channel tetramerization domain containing 9	protein-coding	-1.7	6.71e-07	2.86e-05	-1.43	0.0002	0.0041
NBEA	neurobeachin	protein-coding	-1.7	0.0006	0.0059	-1.36	0.0397	0.153
SERPINB9	serpin family B member 9	protein-coding	-1.7	0.001	0.0086	-1.48	0.0099	0.0586
SESN1	sestrin 1	protein-coding	-1.7	4.22e-06	0.0001	-1.43	0.0005	0.007
TBCK	TBC1 domain containing kinase	protein-coding	-1.7	7.69e-08	5.72e-06	-1.42	5.02e-05	0.0013
ZNF431	zinc finger protein 431	protein-coding	-1.7	8.25e-10	2.35e-07	-1.44	6.55e-07	5.61e-05
CEP170	centrosomal protein 170	protein-coding	-1.69	3.44e-08	3.23e-06	-1.45	7.29e-05	0.0018
CWF19L2	CWF19 like cell cycle control factor 2	protein-coding	-1.69	2.47e-06	7.88e-05	-1.34	0.0049	0.0357
EML4	EMAP like 4	protein-coding	-1.69	2.25e-07	1.29e-05	-1.46	3.55e-05	0.001
GOLGA6L5P	golgin A6 family like 5, pseudogene	pseudo	-1.69	6.34e-05	0.001	-1.28	0.0063	0.0426
PHF20L1	PHD finger protein 20 like 1	protein-coding	-1.69	3.81e-07	1.88e-05	-1.43	0.0004	0.0064
SLTM	SAFB like transcription modulator	protein-coding	-1.69	5.37e-08	4.47e-06	-1.4	0.0007	0.0088
TAF1D	TATA-box binding protein associated factor, RNA polymerase I subunit D	protein-coding	-1.69	2.33e-11	1.56e-08	-1.46	4.24e-07	3.99e-05
UPF2	UPF2 regulator of nonsense mediated mRNA decay	protein-coding	-1.69	1.18e-07	8.03e-06	-1.42	0.0002	0.0035
VCPIP1	valosin containing protein interacting protein 1	protein-coding	-1.69	5.13e-06	0.0001	-1.31	0.002	0.0186
API5	apoptosis inhibitor 5	protein-coding	-1.68	3.67e-07	1.83e-05	-1.44	0.0002	0.0037
CCP110	centriolar coiled-coil protein 110	protein-coding	-1.68	3.77e-05	0.0007	-1.32	0.0169	0.0847
ERV3-1	endogenous retrovirus group 3 member 1, envelope	protein-coding	-1.68	0.0002	0.0021	-1.43	0.0189	0.092
KIAA1109	KIAA1109	protein-coding	-1.68	1.27e-07	8.54e-06	-1.44	0.0002	0.0041
MOSPD2	motile sperm domain containing 2	protein-coding	-1.68	0.0001	0.0014	-1.4	0.0321	0.1324
NR1D2	nuclear receptor subfamily 1 group D member 2	protein-coding	-1.68	0.0006	0.0054	-1.37	0.0836	0.2504
PSD3	pleckstrin and Sec7 domain containing 3	protein-coding	-1.68	3.34e-06	0.0001	-1.42	0.0002	0.0041
SLC26A10	solute carrier family 26 member 10	pseudo	-1.68	0.0011	0.0088	-1.31	0.0775	0.2383
SMG1P1	SMG1 pseudogene 1	pseudo	-1.68	0.0001	0.0018	-1.39	0.0345	0.1391
CFAP70	cilia and flagella associated protein 70	protein-coding	-1.68	4.6e-05	0.0008	-1.49	0.0005	0.0073
NSD3	nuclear receptor binding SET domain protein 3	protein-coding	-1.68	9.85e-09	1.24e-06	-1.41	7.72e-05	0.0018
ZNF470	zinc finger protein 470	protein-coding	-1.68	1.54e-06	5.53e-05	-1.34	0.0015	0.0151
ZNF678	zinc finger protein 678	protein-coding	-1.68	1.68e-06	5.85e-05	-1.3	0.0024	0.021
AMT	aminomethyltransferase	protein-coding	-1.67	3.79e-06	0.0001	-1.49	7.47e-05	0.0018
CRIM1	cysteine rich transmembrane BMP regulator 1	protein-coding	-1.67	0.0003	0.0033	-1.52	0.0013	0.0135
INTS6L	integrator complex subunit 6 like	protein-coding	-1.67	8.61e-06	0.0002	-1.41	0.0011	0.0119
EEA1	early endosome antigen 1	protein-coding	-1.67	3.76e-05	0.0007	-1.52	0.0017	0.0166
EPB41L2	erythrocyte membrane protein band 4.1 like 2	protein-coding	-1.67	3.11e-05	0.0006	-1.43	0.0006	0.0079
LENG9	leukocyte receptor cluster member 9	protein-coding	-1.67	9.47e-08	6.75e-06	-1.48	4.21e-06	0.0002
ODF2L	outer dense fiber of sperm tails 2 like	protein-coding	-1.67	3.9e-06	0.0001	-1.38	0.0007	0.0089
OSBPL1A	oxysterol binding protein like 1A	protein-coding	-1.67	0.0001	0.0016	-1.35	0.0092	0.0558
PAQR3	progestin and adipoQ receptor family member 3	protein-coding	-1.67	3.19e-05	0.0006	-1.49	0.0026	0.0226
PHC3	polyhomeotic homolog 3	protein-coding	-1.67	2.18e-09	4.55e-07	-1.48	2.1e-06	0.0001
RANBP2	RAN binding protein 2	protein-coding	-1.67	6.51e-07	2.83e-05	-1.35	0.0022	0.0198
RPS6KA6	ribosomal protein S6 kinase A6	protein-coding	-1.67	0.0002	0.0028	-1.44	0.002	0.0186
SCAF11	SR-related CTD associated factor 11	protein-coding	-1.67	2.19e-09	4.55e-07	-1.41	2.17e-05	0.0007
SLC12A2	solute carrier family 12 member 2	protein-coding	-1.67	5.37e-08	4.47e-06	-1.49	7.06e-07	5.92e-05
SMC6	structural maintenance of chromosomes 6	protein-coding	-1.67	1.28e-06	4.65e-05	-1.42	0.0011	0.012
TBC1D3F	TBC1 domain family member 3F	protein-coding	-1.67	5.15e-08	4.37e-06	-1.38	8.53e-05	0.002
ASPH	aspartate beta-hydroxylase	protein-coding	-1.66	0.0004	0.004	-1.4	0.0441	0.1643
ATP6V1C1	ATPase H+ transporting V1 subunit C1	protein-coding	-1.66	1.82e-06	6.24e-05	-1.36	0.0017	0.0165
CEP120	centrosomal protein 120	protein-coding	-1.66	3.99e-07	1.93e-05	-1.26	0.004	0.031
CLIP1	CAP-Gly domain containing linker protein 1	protein-coding	-1.66	9.41e-06	0.0002	-1.35	0.0014	0.0145
EIF1AX	eukaryotic translation initiation factor 1A X-linked	protein-coding	-1.66	2.95e-07	1.53e-05	-1.41	0.0003	0.0044
HCFC2	host cell factor C2	protein-coding	-1.66	1.17e-05	0.0003	-1.45	0.0009	0.0107
KLHL11	kelch like family member 11	protein-coding	-1.66	3.47e-07	1.75e-05	-1.48	2.89e-05	0.0009
LRBA	LPS responsive beige-like anchor protein	protein-coding	-1.66	1.54e-07	9.9e-06	-1.49	1.73e-05	0.0006
LRIF1	ligand dependent nuclear receptor interacting factor 1	protein-coding	-1.66	1.07e-05	0.0003	-1.39	0.0016	0.0156
MYSM1	Myb like, SWIRM and MPN domains 1	protein-coding	-1.66	2.14e-07	1.25e-05	-1.31	0.0007	0.0086
RPL23AP32	ribosomal protein L23a pseudogene 32	pseudo	-1.66	0.0003	0.0036	-1.59	0.0012	0.0128
SERAC1	serine active site containing 1	protein-coding	-1.66	0.0011	0.0091	-1.5	0.0043	0.0322
SLC25A36	solute carrier family 25 member 36	protein-coding	-1.66	3.07e-07	1.59e-05	-1.34	0.0011	0.012
SNX6	sorting nexin 6	protein-coding	-1.66	0.0001	0.0016	-1.37	0.0031	0.0258
STXBP3	syntaxin binding protein 3	protein-coding	-1.66	3.76e-08	3.42e-06	-1.44	8.28e-05	0.0019
TBK1	TANK binding kinase 1	protein-coding	-1.66	1.56e-07	9.98e-06	-1.3	0.0064	0.0431
TRPC1	transient receptor potential cation channel subfamily C member 1	protein-coding	-1.66	9.93e-07	3.85e-05	-1.37	0.0002	0.0033
ZNF382	zinc finger protein 382	protein-coding	-1.66	3.41e-06	0.0001	-1.37	0.001	0.0114
ADD3	adducin 3	protein-coding	-1.65	5.04e-07	2.32e-05	-1.42	1.95e-05	0.0007
C22orf46	CTA-216E10.6	pseudo	-1.65	1.72e-06	5.98e-05	-1.49	0.0002	0.0037
CDC5L	cell division cycle 5 like	protein-coding	-1.65	7.35e-07	3.08e-05	-1.44	0.0002	0.0039
DPY19L4	dpy-19 like 4	protein-coding	-1.65	2.97e-06	9.13e-05	-1.3	0.0036	0.0285
FAM76B	family with sequence similarity 76 member B	protein-coding	-1.65	3.99e-07	1.93e-05	-1.33	0.0003	0.0051
MKLN1	muskelin 1	protein-coding	-1.65	5.51e-08	4.48e-06	-1.29	0.0005	0.0072
NEMF	nuclear export mediator factor	protein-coding	-1.65	2.64e-06	8.39e-05	-1.37	0.0009	0.0103
OSBPL9	oxysterol binding protein like 9	protein-coding	-1.65	1.11e-07	7.66e-06	-1.49	1.06e-05	0.0004
PBRM1	polybromo 1	protein-coding	-1.65	2.04e-10	7.45e-08	-1.45	2.67e-07	2.83e-05
PCM1	pericentriolar material 1	protein-coding	-1.65	7.14e-06	0.0002	-1.31	0.0077	0.0489
ZNF195	zinc finger protein 195	protein-coding	-1.65	9.54e-06	0.0002	-1.46	0.0008	0.0098
ZNF800	zinc finger protein 800	protein-coding	-1.65	5.46e-07	2.49e-05	-1.41	0.0004	0.0055
AKAP11	A-kinase anchoring protein 11	protein-coding	-1.64	1.28e-07	8.6e-06	-1.4	0.0002	0.003
AKAP9	A-kinase anchoring protein 9	protein-coding	-1.64	8.78e-05	0.0013	-1.45	0.0093	0.056
ANKRD26	ankyrin repeat domain 26	protein-coding	-1.64	9.4e-07	3.67e-05	-1.38	0.0008	0.0096
CACNA2D1	calcium voltage-gated channel auxiliary subunit alpha2delta 1	protein-coding	-1.64	7.96e-07	3.27e-05	-1.46	1.43e-05	0.0005
CNOT6	CCR4-NOT transcription complex subunit 6	protein-coding	-1.64	5.55e-09	8.53e-07	-1.47	6.22e-06	0.0003
CRYZL1	crystallin zeta like 1	protein-coding	-1.64	1.99e-08	2.2e-06	-1.36	4.58e-05	0.0013
MANSC1	MANSC domain containing 1	protein-coding	-1.64	0.0008	0.0071	-1.38	0.0039	0.03
MID2	midline 2	protein-coding	-1.64	8.6e-07	3.44e-05	-1.48	1.1e-05	0.0004
MYCBP2	MYC binding protein 2	protein-coding	-1.64	9.66e-06	0.0002	-1.33	0.002	0.0188
RAB3GAP1	RAB3 GTPase activating protein catalytic subunit 1	protein-coding	-1.64	3.55e-10	1.19e-07	-1.41	1.97e-05	0.0007
RB1	RB transcriptional corepressor 1	protein-coding	-1.64	7.63e-06	0.0002	-1.42	0.0012	0.0129
RIOK3	RIO kinase 3	protein-coding	-1.64	1.84e-06	6.26e-05	-1.47	0.0003	0.0046
RNF207	ring finger protein 207	protein-coding	-1.64	0.0006	0.0055	-1.42	0.023	0.1054
SNX9	sorting nexin 9	protein-coding	-1.64	2.82e-05	0.0005	-1.41	0.0024	0.0214
STAM	signal transducing adaptor molecule	protein-coding	-1.64	2.49e-05	0.0005	-1.43	0.0002	0.0033
SUCLA2	succinate-CoA ligase ADP-forming subunit beta	protein-coding	-1.64	4.5e-06	0.0001	-1.44	0.0007	0.009
TMEM135	transmembrane protein 135	protein-coding	-1.64	5.82e-07	2.61e-05	-1.33	0.0017	0.0167
ZNF117	zinc finger protein 117	protein-coding	-1.64	0.0005	0.0047	-1.24	0.0924	0.2674
ZNF670	zinc finger protein 670	protein-coding	-1.64	9.77e-05	0.0014	-1.41	0.0013	0.0135
ATG2B	autophagy related 2B	protein-coding	-1.63	3.37e-09	6.13e-07	-1.44	2.93e-06	0.0002
ATP8B3	ATPase phospholipid transporting 8B3	protein-coding	-1.63	5.44e-05	0.0009	-1.33	0.0064	0.0433
CDK17	cyclin dependent kinase 17	protein-coding	-1.63	7.79e-09	1.07e-06	-1.41	7.9e-06	0.0003
EFCAB7	EF-hand calcium binding domain 7	protein-coding	-1.63	1.11e-06	4.16e-05	-1.21	0.0133	0.0719
HOXD4	homeobox D4	protein-coding	-1.63	0.0006	0.0055	-1.45	0.0149	0.0779
CCDC191	coiled-coil domain containing 191	protein-coding	-1.63	6.8e-06	0.0002	-1.29	0.0022	0.0199
LY6G5B	lymphocyte antigen 6 family member G5B	protein-coding	-1.63	1.22e-05	0.0003	-1.44	0.0006	0.0078
MDH1	malate dehydrogenase 1	protein-coding	-1.63	2.91e-06	9e-05	-1.41	0.0007	0.0086
MFSD8	major facilitator superfamily domain containing 8	protein-coding	-1.63	1.22e-09	3.1e-07	-1.44	3.02e-08	6.4e-06
NF1	neurofibromin 1	protein-coding	-1.63	2.26e-08	2.45e-06	-1.25	0.0008	0.0099
PEX3	peroxisomal biogenesis factor 3	protein-coding	-1.63	8.65e-11	4.19e-08	-1.38	2.01e-06	0.0001
PUS7L	pseudouridine synthase 7 like	protein-coding	-1.63	1.95e-06	6.56e-05	-1.31	0.0016	0.0155
RASSF9	Ras association domain family member 9	protein-coding	-1.63	0.0006	0.0055	-1.46	0.0037	0.029
REST	RE1 silencing transcription factor	protein-coding	-1.63	1.18e-08	1.43e-06	-1.24	0.002	0.0185
SLC30A9	solute carrier family 30 member 9	protein-coding	-1.63	4.77e-08	4.15e-06	-1.49	5.03e-06	0.0002
VPS8	VPS8 subunit of CORVET complex	protein-coding	-1.63	6.38e-06	0.0002	-1.48	0.0003	0.0047
VRK2	VRK serine/threonine kinase 2	protein-coding	-1.63	1.88e-06	6.36e-05	-1.38	0.0006	0.008
ZNF121	zinc finger protein 121	protein-coding	-1.63	1.99e-07	1.18e-05	-1.47	6.72e-06	0.0003
ZNF432	zinc finger protein 432	protein-coding	-1.63	2.12e-07	1.25e-05	-1.45	7.94e-06	0.0003
AK4	adenylate kinase 4	protein-coding	-1.62	0.0005	0.0051	-1.44	0.0011	0.0117
APPL1	adaptor protein, phosphotyrosine interacting with PH domain and leucine zipper 1	protein-coding	-1.62	1.24e-07	8.38e-06	-1.42	0.0003	0.0043
BRWD3	bromodomain and WD repeat domain containing 3	protein-coding	-1.62	1.17e-05	0.0003	-1.36	0.0006	0.0076
BTBD19	BTB domain containing 19	protein-coding	-1.62	1.05e-05	0.0002	-1.47	8.02e-05	0.0019
SMIM8	small integral membrane protein 8	protein-coding	-1.62	6.49e-06	0.0002	-1.49	0.0002	0.0036
DOCK9	dedicator of cytokinesis 9	protein-coding	-1.62	6.65e-05	0.001	-1.54	0.0009	0.0107
FAM98B	family with sequence similarity 98 member B	protein-coding	-1.62	6.07e-05	0.001	-1.28	0.0374	0.1471
ITFG1	integrin alpha FG-GAP repeat containing 1	protein-coding	-1.62	6.07e-07	2.71e-05	-1.4	0.0001	0.0028
LINC00997	long intergenic non-protein coding RNA 997	ncRNA	-1.62	4.88e-05	0.0008	-1.35	0.0037	0.0293
MSH5	mutS homolog 5	protein-coding	-1.62	3.28e-06	9.91e-05	-1.38	0.0005	0.0066
NFAT5	nuclear factor of activated T cells 5	protein-coding	-1.62	4.66e-06	0.0001	-1.38	0.0007	0.0087
NOL8	nucleolar protein 8	protein-coding	-1.62	9e-07	3.55e-05	-1.34	0.0063	0.0429
PPP4R1L	protein phosphatase 4 regulatory subunit 1 like (pseudogene)	pseudo	-1.62	3.44e-07	1.74e-05	-1.42	0.0001	0.0028
RAB11FIP2	RAB11 family interacting protein 2	protein-coding	-1.62	3.18e-05	0.0006	-1.33	0.0084	0.052
RARA	retinoic acid receptor alpha	protein-coding	-1.62	2.03e-05	0.0004	-1.38	0.0002	0.0036
RNMT	RNA guanine-7 methyltransferase	protein-coding	-1.62	1.4e-07	9.16e-06	-1.3	0.0004	0.0054
SLC35F5	solute carrier family 35 member F5	protein-coding	-1.62	3.96e-08	3.53e-06	-1.36	0.0001	0.0028
UPF3B	UPF3B regulator of nonsense mediated mRNA decay	protein-coding	-1.62	0.0003	0.0036	-1.29	0.0598	0.2009
ZNF514	zinc finger protein 514	protein-coding	-1.62	1.38e-07	9.1e-06	-1.36	0.0002	0.0032
ZWILCH	zwilch kinetochore protein	protein-coding	-1.62	0.0003	0.0036	-1.34	0.0252	0.1122
ARL17B	ADP ribosylation factor like GTPase 17B	protein-coding	-1.61	2.35e-05	0.0005	-1.49	0.0004	0.0054
BRWD1	bromodomain and WD repeat domain containing 1	protein-coding	-1.61	6.09e-07	2.71e-05	-1.39	0.0001	0.0028
CEP350	centrosomal protein 350	protein-coding	-1.61	2.56e-07	1.41e-05	-1.37	0.0009	0.0102
DDHD1	DDHD domain containing 1	protein-coding	-1.61	1.5e-06	5.41e-05	-1.31	0.0004	0.0059
EIF5B	eukaryotic translation initiation factor 5B	protein-coding	-1.61	1.12e-06	4.18e-05	-1.31	0.0023	0.0207
SLF2	SMC5-SMC6 complex localization factor 2	protein-coding	-1.61	3.81e-07	1.88e-05	-1.35	0.0006	0.008
PAXBP1	PAX3 and PAX7 binding protein 1	protein-coding	-1.61	8.37e-07	3.39e-05	-1.48	1.96e-05	0.0007
NPIPB5	nuclear pore complex interacting protein family member B5	protein-coding	-1.61	6.42e-06	0.0002	-1.43	0.0011	0.0119
LOC100132356	uncharacterized LOC100132356	ncRNA	-1.61	1.22e-06	4.51e-05	-1.38	0.0003	0.0047
NAE1	NEDD8 activating enzyme E1 subunit 1	protein-coding	-1.61	3.13e-08	3.05e-06	-1.36	5.25e-05	0.0014
RAB8B	RAB8B, member RAS oncogene family	protein-coding	-1.61	0.0004	0.0038	-1.28	0.0912	0.2653
UBR4	ubiquitin protein ligase E3 component n-recognin 4	protein-coding	-1.61	8e-06	0.0002	-1.39	0.0012	0.0125
ZNF354A	zinc finger protein 354A	protein-coding	-1.61	2.63e-08	2.69e-06	-1.29	0.0001	0.0022
ZNF37A	zinc finger protein 37A	protein-coding	-1.61	6.84e-09	9.75e-07	-1.36	9.53e-05	0.0021
ZNF766	zinc finger protein 766	protein-coding	-1.61	2.1e-09	4.46e-07	-1.4	2.29e-07	2.54e-05
ALKBH8	alkB homolog 8, tRNA methyltransferase	protein-coding	-1.6	1.52e-05	0.0003	-1.2	0.0923	0.2672
ANKRD42	ankyrin repeat domain 42	protein-coding	-1.6	7.81e-05	0.0012	-1.47	0.0003	0.0046
AURKAP1	aurora kinase A pseudogene 1	pseudo	-1.6	5.79e-06	0.0002	-1.43	0.0006	0.0084
BOD1L1	biorientation of chromosomes in cell division 1 like 1	protein-coding	-1.6	2.81e-07	1.49e-05	-1.31	0.0022	0.02
CAND1	cullin associated and neddylation dissociated 1	protein-coding	-1.6	1.62e-07	1.02e-05	-1.49	1.33e-05	0.0005
FAM200A	family with sequence similarity 200 member A	protein-coding	-1.6	5.97e-08	4.74e-06	-1.46	9.13e-07	7.06e-05
KIAA0825	KIAA0825	protein-coding	-1.6	8.17e-06	0.0002	-1.36	0.0013	0.0138
LINC00265	long intergenic non-protein coding RNA 265	ncRNA	-1.6	2.74e-05	0.0005	-1.36	0.0018	0.0175
LIPA	lipase A, lysosomal acid type	protein-coding	-1.6	0.0002	0.0022	-1.43	0.0014	0.0142
LTB4R2	leukotriene B4 receptor 2	protein-coding	-1.6	4.94e-06	0.0001	-1.41	0.0002	0.0035
PNISR	PNN interacting serine and arginine rich protein	protein-coding	-1.6	3.73e-07	1.86e-05	-1.33	0.001	0.0111
REC8	REC8 meiotic recombination protein	protein-coding	-1.6	0.0002	0.0024	-1.39	0.0029	0.0243
RNPC3	RNA binding region (RNP1, RRM) containing 3	protein-coding	-1.6	1.58e-05	0.0003	-1.4	0.0004	0.0059
SHPRH	SNF2 histone linker PHD RING helicase	protein-coding	-1.6	4.39e-05	0.0007	-1.21	0.0729	0.2288
SLC46A3	solute carrier family 46 member 3	protein-coding	-1.6	0.001	0.0083	-1.46	0.0015	0.0148
STT3B	STT3 oligosaccharyltransferase complex catalytic subunit B	protein-coding	-1.6	6.45e-07	2.83e-05	-1.36	0.0004	0.0064
SUCO	SUN domain containing ossification factor	protein-coding	-1.6	1.01e-06	3.85e-05	-1.36	0.0004	0.0065
TTC3P1	tetratricopeptide repeat domain 3 pseudogene 1	pseudo	-1.6	0.0002	0.0025	-1.4	0.0026	0.0225
VMP1	vacuole membrane protein 1	protein-coding	-1.6	6.71e-06	0.0002	-1.27	0.0054	0.0383
VPS13B	vacuolar protein sorting 13 homolog B	protein-coding	-1.6	4.64e-05	0.0008	-1.34	0.0029	0.0245
ZC3H13	zinc finger CCCH-type containing 13	protein-coding	-1.6	6.92e-06	0.0002	-1.29	0.0052	0.0373
ZDHHC17	zinc finger DHHC-type palmitoyltransferase 17	protein-coding	-1.6	5.29e-08	4.46e-06	-1.4	0.0001	0.0028
ALG13	ALG13 UDP-N-acetylglucosaminyltransferase subunit	protein-coding	-1.59	3.63e-07	1.81e-05	-1.42	5.41e-05	0.0014
ARL15	ADP ribosylation factor like GTPase 15	protein-coding	-1.59	1.33e-05	0.0003	-1.34	0.0002	0.004
ASAP1	ArfGAP with SH3 domain, ankyrin repeat and PH domain 1	protein-coding	-1.59	5.57e-05	0.0009	-1.32	0.0073	0.0475
CIRBP	cold inducible RNA binding protein	protein-coding	-1.59	3.51e-06	0.0001	-1.34	0.0002	0.0041
CTNNA1	catenin alpha 1	protein-coding	-1.59	1.46e-07	9.46e-06	-1.46	2.35e-05	0.0008
ERCC6L2	ERCC excision repair 6 like 2	protein-coding	-1.59	1e-07	6.98e-06	-1.41	8.22e-05	0.0019
IFT46	intraflagellar transport 46	protein-coding	-1.59	7.37e-07	3.08e-05	-1.42	2.81e-05	0.0009
KDM7A	lysine demethylase 7A	protein-coding	-1.59	5.33e-06	0.0001	-1.45	0.0017	0.0165
MACROD2	mono-ADP ribosylhydrolase 2	protein-coding	-1.59	0.0004	0.0043	-1.45	0.0007	0.0086
MOB1B	MOB kinase activator 1B	protein-coding	-1.59	1.48e-06	5.32e-05	-1.35	0.0013	0.0138
PALS1	protein associated with LIN7 1, MAGUK family member	protein-coding	-1.59	1.62e-05	0.0003	-1.41	0.0004	0.0054
NCOA3	nuclear receptor coactivator 3	protein-coding	-1.59	1.65e-09	3.81e-07	-1.48	4.26e-08	7.84e-06
RNF170	ring finger protein 170	protein-coding	-1.59	7.12e-07	3e-05	-1.27	0.0046	0.0338
SBF2	SET binding factor 2	protein-coding	-1.59	9.67e-05	0.0014	-1.36	0.0122	0.0678
SPAG9	sperm associated antigen 9	protein-coding	-1.59	7.72e-09	1.06e-06	-1.38	3.97e-06	0.0002
SUN1	Sad1 and UNC84 domain containing 1	protein-coding	-1.59	1.88e-05	0.0004	-1.45	0.0002	0.0036
TCAIM	T cell activation inhibitor, mitochondrial	protein-coding	-1.59	8.87e-06	0.0002	-1.43	0.0003	0.0045
UBE2Q2P2	ubiquitin conjugating enzyme E2 Q2 pseudogene 2	pseudo	-1.59	1.01e-05	0.0002	-1.24	0.013	0.0706
USP15	ubiquitin specific peptidase 15	protein-coding	-1.59	3.71e-06	0.0001	-1.4	0.004	0.0306
YTHDC1	YTH domain containing 1	protein-coding	-1.59	8.8e-08	6.38e-06	-1.38	0.0002	0.0031
ZC2HC1A	zinc finger C2HC-type containing 1A	protein-coding	-1.59	4.77e-05	0.0008	-1.32	0.0032	0.0267
ZNF131	zinc finger protein 131	protein-coding	-1.59	5.12e-06	0.0001	-1.49	0.0002	0.003
ZNF445	zinc finger protein 445	protein-coding	-1.59	2.68e-09	5.42e-07	-1.47	2.29e-07	2.54e-05
ZNF449	zinc finger protein 449	protein-coding	-1.59	0.0002	0.0024	-1.37	0.0092	0.0558
ZNF507	zinc finger protein 507	protein-coding	-1.59	3.55e-05	0.0006	-1.28	0.0133	0.072
ABCC5	ATP binding cassette subfamily C member 5	protein-coding	-1.58	1.76e-08	2.01e-06	-1.43	8.25e-06	0.0003
BMP2K	BMP2 inducible kinase	protein-coding	-1.58	0.001	0.0081	-1.32	0.0156	0.0802
BMPR2	bone morphogenetic protein receptor type 2	protein-coding	-1.58	5.51e-10	1.71e-07	-1.46	2.03e-07	2.32e-05
BROX	BRO1 domain and CAAX motif containing	protein-coding	-1.58	5.91e-05	0.0009	-1.32	0.0042	0.0319
DHX29	DExH-box helicase 29	protein-coding	-1.58	7.53e-08	5.61e-06	-1.4	0.0001	0.0027
FER	FER tyrosine kinase	protein-coding	-1.58	1e-06	3.85e-05	-1.41	0.0004	0.0056
GFPT2	glutamine-fructose-6-phosphate transaminase 2	protein-coding	-1.58	0.0012	0.0094	-1.5	0.0038	0.0296
GPR135	G protein-coupled receptor 135	protein-coding	-1.58	0.0003	0.0035	-1.35	0.0081	0.051
HINT3	histidine triad nucleotide binding protein 3	protein-coding	-1.58	0.0002	0.0021	-1.35	0.0534	0.1868
CILK1	ciliogenesis associated kinase 1	protein-coding	-1.58	2.16e-07	1.26e-05	-1.33	0.0004	0.0063
LINC00674	long intergenic non-protein coding RNA 674	ncRNA	-1.58	1.4e-05	0.0003	-1.38	0.0002	0.0037
JMJD1C-AS1	JMJD1C antisense RNA 1	ncRNA	-1.58	1.11e-06	4.16e-05	-1.4	0.0003	0.0047
NUBPL	nucleotide binding protein like	protein-coding	-1.58	1.46e-05	0.0003	-1.44	0.0001	0.0025
RASSF8	Ras association domain family member 8	protein-coding	-1.58	0.0006	0.0055	-1.35	0.0059	0.0405
RBM41	RNA binding motif protein 41	protein-coding	-1.58	1.75e-06	6.02e-05	-1.38	9.17e-05	0.0021
RNF13	ring finger protein 13	protein-coding	-1.58	2e-07	1.19e-05	-1.37	9.42e-05	0.0021
RNF217	ring finger protein 217	protein-coding	-1.58	3.64e-05	0.0007	-1.44	0.0005	0.0068
SMG6	SMG6 nonsense mediated mRNA decay factor	protein-coding	-1.58	0.0007	0.0063	-1.4	0.0161	0.082
SS18	SS18 subunit of BAF chromatin remodeling complex	protein-coding	-1.58	1.72e-08	1.99e-06	-1.42	1.91e-05	0.0006
SZT2	SZT2 subunit of KICSTOR complex	protein-coding	-1.58	5.72e-07	2.57e-05	-1.46	4.53e-05	0.0012
THOC2	THO complex 2	protein-coding	-1.58	2.87e-06	8.91e-05	-1.3	0.0135	0.0727
VN1R1	vomeronasal 1 receptor 1	protein-coding	-1.58	1.05e-05	0.0002	-1.45	9.55e-05	0.0021
WDR36	WD repeat domain 36	protein-coding	-1.58	2.99e-05	0.0006	-1.37	0.0037	0.029
ZNF471	zinc finger protein 471	protein-coding	-1.58	0.0002	0.0026	-1.23	0.0343	0.1385
BAZ2B	bromodomain adjacent to zinc finger domain 2B	protein-coding	-1.57	4.83e-05	0.0008	-1.33	0.008	0.0505
CCDC186	coiled-coil domain containing 186	protein-coding	-1.57	0.0007	0.0066	-1.2	0.151	0.3698
CCSAP	centriole, cilia and spindle associated protein	protein-coding	-1.57	0.0003	0.0036	-1.38	0.0032	0.0267
CLASP2	cytoplasmic linker associated protein 2	protein-coding	-1.57	3.84e-07	1.89e-05	-1.43	3.46e-06	0.0002
CPNE3	copine 3	protein-coding	-1.57	8.18e-06	0.0002	-1.35	0.0012	0.0126
CSAD	cysteine sulfinic acid decarboxylase	protein-coding	-1.57	1.9e-05	0.0004	-1.34	0.0013	0.0133
DDX52	DExD-box helicase 52	protein-coding	-1.57	1.24e-06	4.54e-05	-1.43	8.61e-05	0.002
ERC1	ELKS/RAB6-interacting/CAST family member 1	protein-coding	-1.57	1.33e-08	1.59e-06	-1.44	2.78e-06	0.0002
ERMP1	endoplasmic reticulum metallopeptidase 1	protein-coding	-1.57	1.94e-07	1.16e-05	-1.36	0.0001	0.0028
FAM126B	family with sequence similarity 126 member B	protein-coding	-1.57	2.6e-07	1.42e-05	-1.49	1.6e-05	0.0006
RMDN1	regulator of microtubule dynamics 1	protein-coding	-1.57	1.55e-06	5.54e-05	-1.29	0.0022	0.0202
FYCO1	FYVE and coiled-coil domain autophagy adaptor 1	protein-coding	-1.57	0.0003	0.0031	-1.46	0.0013	0.0136
G2E3	G2/M-phase specific E3 ubiquitin protein ligase	protein-coding	-1.57	9.54e-06	0.0002	-1.38	0.0001	0.0028
GAS5-AS1	GAS5 antisense RNA 1	ncRNA	-1.57	1.34e-05	0.0003	-1.39	0.0005	0.0067
KLHL24	kelch like family member 24	protein-coding	-1.57	7.07e-05	0.0011	-1.3	0.0064	0.0434
MIER3	MIER family member 3	protein-coding	-1.57	8.51e-06	0.0002	-1.37	0.0006	0.0083
NCBP2	nuclear cap binding protein subunit 2	protein-coding	-1.57	1.65e-07	1.03e-05	-1.39	0.001	0.0113
PTPN11	protein tyrosine phosphatase non-receptor type 11	protein-coding	-1.57	1.88e-05	0.0004	-1.4	0.0005	0.0069
ROCK2	Rho associated coiled-coil containing protein kinase 2	protein-coding	-1.57	9.86e-06	0.0002	-1.16	0.1007	0.2834
SMAD3	SMAD family member 3	protein-coding	-1.57	0.0004	0.0044	-1.22	0.0282	0.1217
SNORA70E	small nucleolar RNA, H/ACA box 70E	snoRNA	-1.57	8.97e-05	0.0013	-1.41	0.0005	0.0071
SP100	SP100 nuclear antigen	protein-coding	-1.57	0.0002	0.0025	-1.36	0.0191	0.0923
STAG2	stromal antigen 2	protein-coding	-1.57	2.21e-05	0.0004	-1.23	0.0344	0.1388
TRAPPC8	trafficking protein particle complex subunit 8	protein-coding	-1.57	4.91e-07	2.27e-05	-1.36	0.0002	0.0033
TRIM33	tripartite motif containing 33	protein-coding	-1.57	2.12e-05	0.0004	-1.3	0.0013	0.0138
ZNF354B	zinc finger protein 354B	protein-coding	-1.57	0.0001	0.0016	-1.26	0.0086	0.0531
ZNF841	zinc finger protein 841	protein-coding	-1.57	7.02e-09	9.93e-07	-1.47	1.03e-06	7.7e-05
AVPI1	arginine vasopressin induced 1	protein-coding	-1.56	0.0005	0.0045	-1.77	0.0014	0.0143
CNOT4	CCR4-NOT transcription complex subunit 4	protein-coding	-1.56	0.0005	0.0051	-1.38	0.0243	0.1094
DCP2	decapping mRNA 2	protein-coding	-1.56	2.69e-06	8.49e-05	-1.31	0.0043	0.0323
DCUN1D5	defective in cullin neddylation 1 domain containing 5	protein-coding	-1.56	5.19e-05	0.0009	-1.43	0.0031	0.0256
DYNC2LI1	dynein cytoplasmic 2 light intermediate chain 1	protein-coding	-1.56	1.7e-05	0.0004	-1.17	0.0191	0.0924
FAM199X	family with sequence similarity 199, X-linked	protein-coding	-1.56	4.06e-07	1.95e-05	-1.38	9.86e-05	0.0022
MINDY2	MINDY lysine 48 deubiquitinase 2	protein-coding	-1.56	7.14e-05	0.0011	-1.46	0.0004	0.0063
HEATR1	HEAT repeat containing 1	protein-coding	-1.56	2.5e-08	2.6e-06	-1.36	3.4e-05	0.001
HERC2P9	HERC2 pseudogene 9	pseudo	-1.56	0.0002	0.0027	-1.24	0.0495	0.1778
ELP1	elongator acetyltransferase complex subunit 1	protein-coding	-1.56	7.97e-07	3.27e-05	-1.48	4.93e-05	0.0013
KIAA1143	KIAA1143	protein-coding	-1.56	2.52e-05	0.0005	-1.42	0.0009	0.0107
NPEPPSP1	NPEPPS pseudogene 1	pseudo	-1.56	7.85e-09	1.07e-06	-1.41	4.64e-07	4.28e-05
LRP1	LDL receptor related protein 1	protein-coding	-1.56	7.92e-07	3.27e-05	-1.48	5.63e-07	5.04e-05
MED1	mediator complex subunit 1	protein-coding	-1.56	2.67e-08	2.69e-06	-1.43	1.52e-06	0.0001
MTX3	metaxin 3	protein-coding	-1.56	3.04e-06	9.31e-05	-1.31	0.002	0.0184
MMUT	methylmalonyl-CoA mutase	protein-coding	-1.56	2.65e-07	1.44e-05	-1.32	0.0002	0.0035
MYADM	myeloid associated differentiation marker	protein-coding	-1.56	0.0001	0.0015	-1.38	0.0005	0.007
NAP1L1	nucleosome assembly protein 1 like 1	protein-coding	-1.56	1.39e-05	0.0003	-1.48	0.0005	0.0068
NUDT12	nudix hydrolase 12	protein-coding	-1.56	0.0009	0.0078	-1.32	0.0122	0.0678
PHF3	PHD finger protein 3	protein-coding	-1.56	0.0001	0.0017	-1.21	0.0794	0.2418
PLA2G6	phospholipase A2 group VI	protein-coding	-1.56	0.0002	0.0027	-1.36	0.0165	0.0833
PSMG2	proteasome assembly chaperone 2	protein-coding	-1.56	6.67e-06	0.0002	-1.46	9.79e-05	0.0021
SETDB2	SET domain bifurcated histone lysine methyltransferase 2	protein-coding	-1.56	0.0002	0.0022	-1.3	0.0235	0.1068
TFRC	transferrin receptor	protein-coding	-1.56	5.7e-05	0.0009	-1.48	0.0005	0.0067
TLK2	tousled like kinase 2	protein-coding	-1.56	4.51e-09	7.28e-07	-1.44	5.31e-08	9.28e-06
ZBTB20	zinc finger and BTB domain containing 20	protein-coding	-1.56	0.0001	0.0018	-1.35	0.0038	0.0295
ZNF106	zinc finger protein 106	protein-coding	-1.56	6.29e-07	2.77e-05	-1.44	1.67e-05	0.0006
ZNF462	zinc finger protein 462	protein-coding	-1.56	0.0003	0.0029	-1.4	0.0092	0.0558
ZNF665	zinc finger protein 665	protein-coding	-1.56	1.13e-05	0.0003	-1.35	0.0007	0.0088
ADAT2	adenosine deaminase tRNA specific 2	protein-coding	-1.55	2.95e-05	0.0006	-1.39	0.0001	0.0029
ATXN1	ataxin 1	protein-coding	-1.55	8.78e-06	0.0002	-1.36	0.0006	0.0077
BACH1	BTB domain and CNC homolog 1	protein-coding	-1.55	8.39e-05	0.0012	-1.3	0.0025	0.0222
BTG1	BTG anti-proliferation factor 1	protein-coding	-1.55	8.09e-05	0.0012	-1.29	0.0033	0.0269
CBWD2	COBW domain containing 2	protein-coding	-1.55	5.9e-09	8.76e-07	-1.35	3.52e-06	0.0002
CREBZF	CREB/ATF bZIP transcription factor	protein-coding	-1.55	1.63e-07	1.02e-05	-1.32	0.0001	0.0025
DGKH	diacylglycerol kinase eta	protein-coding	-1.55	1.61e-06	5.71e-05	-1.42	0.0001	0.0025
KIAA0586	KIAA0586	protein-coding	-1.55	8.44e-05	0.0012	-1.3	0.003	0.0248
RESF1	retroelement silencing factor 1	protein-coding	-1.55	0.0001	0.0014	-1.29	0.0082	0.0513
MAN1A2	mannosidase alpha class 1A member 2	protein-coding	-1.55	1.77e-07	1.09e-05	-1.31	0.0001	0.0023
MEG8	maternally expressed 8, small nucleolar RNA host gene	ncRNA	-1.55	0.0003	0.0034	-1.47	0.0003	0.0044
OGA	O-GlcNAcase	protein-coding	-1.55	1.13e-09	2.91e-07	-1.41	4.34e-06	0.0002
MPHOSPH9	M-phase phosphoprotein 9	protein-coding	-1.55	1.37e-05	0.0003	-1.28	0.0046	0.0339
MTPN	myotrophin	protein-coding	-1.55	1.66e-06	5.84e-05	-1.38	0.0002	0.0035
PPM1B	protein phosphatase, Mg2+/Mn2+ dependent 1B	protein-coding	-1.55	1.86e-07	1.13e-05	-1.43	8.99e-06	0.0004
RAP1A	RAP1A, member of RAS oncogene family	protein-coding	-1.55	6.82e-06	0.0002	-1.33	0.0015	0.0149
RPL6	ribosomal protein L6	protein-coding	-1.55	0.0002	0.0026	-1.55	0.0012	0.013
SH3GL1P1	SH3 domain containing GRB2 like 1, endophilin A2 pseudogene 1	pseudo	-1.55	3.18e-06	9.66e-05	-1.46	2.05e-05	0.0007
SOWAHC	sosondowah ankyrin repeat domain family member C	protein-coding	-1.55	0.0003	0.0032	-1.23	0.0335	0.1363
ST3GAL5	ST3 beta-galactoside alpha-2,3-sialyltransferase 5	protein-coding	-1.55	3.3e-06	9.93e-05	-1.49	1.07e-05	0.0004
STRN	striatin	protein-coding	-1.55	6.15e-07	2.74e-05	-1.33	0.0005	0.0065
ZFP14	ZFP14 zinc finger protein	protein-coding	-1.55	1.59e-05	0.0003	-1.34	0.0011	0.0117
ZNF107	zinc finger protein 107	protein-coding	-1.55	2.15e-05	0.0004	-1.25	0.011	0.0629
ZNF570	zinc finger protein 570	protein-coding	-1.55	4.26e-05	0.0007	-1.32	0.0024	0.0214
ARIH1	ariadne RBR E3 ubiquitin protein ligase 1	protein-coding	-1.54	2.63e-07	1.43e-05	-1.37	4.37e-05	0.0012
AXL	AXL receptor tyrosine kinase	protein-coding	-1.54	0.0002	0.0025	-1.4	0.0014	0.014
C1GALT1C1	C1GALT1 specific chaperone 1	protein-coding	-1.54	9.75e-05	0.0014	-1.46	0.0001	0.0022
CAPNS2	calpain small subunit 2	protein-coding	-1.54	3.24e-07	1.66e-05	-1.45	1.42e-05	0.0005
CCDC43	coiled-coil domain containing 43	protein-coding	-1.54	2.8e-08	2.77e-06	-1.3	0.0004	0.0054
CCDC88A	coiled-coil domain containing 88A	protein-coding	-1.54	0.0004	0.0038	-1.26	0.0582	0.1975
CD164	CD164 molecule	protein-coding	-1.54	1.65e-06	5.84e-05	-1.21	0.0147	0.0772
CYP2U1	cytochrome P450 family 2 subfamily U member 1	protein-coding	-1.54	0.0007	0.0065	-1.47	0.0005	0.0072
FAP	fibroblast activation protein alpha	protein-coding	-1.54	0.0009	0.0078	-1.19	0.0335	0.1363
GPATCH2	G-patch domain containing 2	protein-coding	-1.54	8.75e-07	3.46e-05	-1.43	1.65e-05	0.0006
HERC2P2	HERC2 pseudogene 2	pseudo	-1.54	0.0003	0.0032	-1.22	0.0434	0.1624
HPX	hemopexin	protein-coding	-1.54	2.02e-05	0.0004	-1.34	0.0012	0.0125
HSP90AA1	heat shock protein 90 alpha family class A member 1	protein-coding	-1.54	0.0006	0.0057	-1.36	0.0206	0.0975
INO80D	INO80 complex subunit D	protein-coding	-1.54	1.93e-06	6.52e-05	-1.39	0.0003	0.0044
LINC00515	long intergenic non-protein coding RNA 515	ncRNA	-1.54	4.1e-05	0.0007	-1.39	0.0018	0.0174
PDCD6P1	PDCD6 pseudogene 1	pseudo	-1.54	0.0002	0.0023	-1.26	0.0292	0.1245
LPP	LIM domain containing preferred translocation partner in lipoma	protein-coding	-1.54	4.94e-05	0.0008	-1.36	0.0025	0.0216
LUC7L3	LUC7 like 3 pre-mRNA splicing factor	protein-coding	-1.54	3.32e-06	9.99e-05	-1.45	0.0003	0.0049
MAPK8IP3	mitogen-activated protein kinase 8 interacting protein 3	protein-coding	-1.54	2.91e-07	1.52e-05	-1.32	0.0004	0.0056
PDXDC2P	pyridoxal dependent decarboxylase domain containing 2, pseudogene	pseudo	-1.54	6.75e-05	0.001	-1.46	5.94e-05	0.0015
PHF10	PHD finger protein 10	protein-coding	-1.54	0.0011	0.0089	-1.36	0.0119	0.0663
PHKA2	phosphorylase kinase regulatory subunit alpha 2	protein-coding	-1.54	1.04e-06	3.94e-05	-1.37	0.0005	0.0068
PNN	pinin, desmosome associated protein	protein-coding	-1.54	4.73e-06	0.0001	-1.37	0.0012	0.0125
PRRC2C	proline rich coiled-coil 2C	protein-coding	-1.54	4.46e-08	3.9e-06	-1.36	7.89e-05	0.0019
RAD54L2	RAD54 like 2	protein-coding	-1.54	6.26e-09	9.24e-07	-1.45	1.73e-06	0.0001
RAPGEF4	Rap guanine nucleotide exchange factor 4	protein-coding	-1.54	8.65e-05	0.0013	-1.28	0.0063	0.0427
RASAL2	RAS protein activator like 2	protein-coding	-1.54	9.13e-07	3.59e-05	-1.45	7.45e-05	0.0018
RPS15AP10	ribosomal protein S15a pseudogene 10	pseudo	-1.54	0.0001	0.0017	-1.33	0.0019	0.0179
SLK	STE20 like kinase	protein-coding	-1.54	2.89e-05	0.0005	-1.37	0.0038	0.0295
SREK1IP1	SREK1 interacting protein 1	protein-coding	-1.54	6.63e-06	0.0002	-1.27	0.0045	0.0335
TPP2	tripeptidyl peptidase 2	protein-coding	-1.54	2.93e-07	1.53e-05	-1.22	0.0041	0.0316
TTC7A	tetratricopeptide repeat domain 7A	protein-coding	-1.54	2.77e-07	1.47e-05	-1.48	4.55e-06	0.0002
ZFYVE9	zinc finger FYVE-type containing 9	protein-coding	-1.54	2.46e-08	2.59e-06	-1.37	2.65e-05	0.0008
ZNF441	zinc finger protein 441	protein-coding	-1.54	4.97e-05	0.0008	-1.32	0.0021	0.0197
ACADSB	acyl-CoA dehydrogenase short/branched chain	protein-coding	-1.53	3.25e-05	0.0006	-1.26	0.0062	0.0421
ALDH1L2	aldehyde dehydrogenase 1 family member L2	protein-coding	-1.53	0.0003	0.0036	-1.29	0.0445	0.1655
BTBD8	BTB domain containing 8	protein-coding	-1.53	7.63e-05	0.0011	-1.32	0.0041	0.0314
CHMP2B	charged multivesicular body protein 2B	protein-coding	-1.53	0.0001	0.0018	-1.3	0.0123	0.0678
CLCC1	chloride channel CLIC like 1	protein-coding	-1.53	3.3e-07	1.69e-05	-1.32	2.23e-05	0.0007
DOP1A	DOP1 leucine zipper like protein A	protein-coding	-1.53	2.75e-06	8.63e-05	-1.16	0.0236	0.1069
FBXO8	F-box protein 8	protein-coding	-1.53	2.6e-05	0.0005	-1.46	0.0002	0.0033
GAPVD1	GTPase activating protein and VPS9 domains 1	protein-coding	-1.53	1.27e-07	8.54e-06	-1.43	1.16e-06	8.44e-05
HEATR5B	HEAT repeat containing 5B	protein-coding	-1.53	2.49e-07	1.38e-05	-1.42	1.47e-05	0.0005
KAT2B	lysine acetyltransferase 2B	protein-coding	-1.53	0.0002	0.0023	-1.39	0.001	0.0117
NAV2-AS6	NAV2 antisense RNA 6	ncRNA	-1.53	0.0004	0.0042	-1.39	0.001	0.0112
MIR3936HG	MIR3936 host gene	ncRNA	-1.53	0.0002	0.0026	-1.36	0.0013	0.0137
MARCHF7	membrane associated ring-CH-type finger 7	protein-coding	-1.53	4.72e-06	0.0001	-1.36	0.0007	0.0089
MED19	mediator complex subunit 19	protein-coding	-1.53	8.41e-06	0.0002	-1.38	0.0002	0.0041
OXCT1	3-oxoacid CoA-transferase 1	protein-coding	-1.53	0.0003	0.0029	-1.47	0.0008	0.0094
PCNAP1	proliferating cell nuclear antigen pseudogene 1	pseudo	-1.53	5.47e-06	0.0002	-1.42	5.31e-05	0.0014
PMS1	PMS1 homolog 1, mismatch repair system component	protein-coding	-1.53	0.0002	0.0023	-1.39	0.0008	0.0099
PPIP5K1	diphosphoinositol pentakisphosphate kinase 1	protein-coding	-1.53	9.67e-07	3.77e-05	-1.47	2.1e-06	0.0001
RER1	retention in endoplasmic reticulum sorting receptor 1	protein-coding	-1.53	1.62e-05	0.0003	-1.49	0.0002	0.0029
RSF1	remodeling and spacing factor 1	protein-coding	-1.53	0.0001	0.0015	-1.26	0.0313	0.1304
SENP7	SUMO specific peptidase 7	protein-coding	-1.53	0.0002	0.0027	-1.22	0.0596	0.2006
SGTB	small glutamine rich tetratricopeptide repeat co-chaperone beta	protein-coding	-1.53	0.0004	0.0039	-1.34	0.0136	0.0731
SLC38A6	solute carrier family 38 member 6	protein-coding	-1.53	1.65e-05	0.0004	-1.29	0.009	0.0549
SMG1	SMG1 nonsense mediated mRNA decay associated PI3K related kinase	protein-coding	-1.53	2.58e-07	1.41e-05	-1.31	0.0005	0.0074
SRRM2	serine/arginine repetitive matrix 2	protein-coding	-1.53	1.59e-07	1.01e-05	-1.39	0.0002	0.0036
TYRO3P	TYRO3P protein tyrosine kinase pseudogene	pseudo	-1.53	2.15e-05	0.0004	-1.45	0.0001	0.0025
UBR5	ubiquitin protein ligase E3 component n-recognin 5	protein-coding	-1.53	3.44e-09	6.13e-07	-1.38	6.02e-06	0.0003
WDSUB1	WD repeat, sterile alpha motif and U-box domain containing 1	protein-coding	-1.53	5.41e-05	0.0009	-1.42	0.0005	0.0069
ZBTB1	zinc finger and BTB domain containing 1	protein-coding	-1.53	3.16e-05	0.0006	-1.3	0.0132	0.0715
ZBTB11	zinc finger and BTB domain containing 11	protein-coding	-1.53	6.66e-07	2.84e-05	-1.35	8.11e-05	0.0019
ZNF37BP	zinc finger protein 37B, pseudogene	pseudo	-1.53	4.43e-05	0.0008	-1.22	0.0362	0.1438
ZNF43	zinc finger protein 43	protein-coding	-1.53	1.66e-06	5.84e-05	-1.33	0.0002	0.0041
ZNF69	zinc finger protein 69	protein-coding	-1.53	0.0001	0.0018	-1.42	0.0006	0.008
AP1G1	adaptor related protein complex 1 subunit gamma 1	protein-coding	-1.52	9.18e-11	4.34e-08	-1.42	2.46e-08	5.56e-06
ASH1L	ASH1 like histone lysine methyltransferase	protein-coding	-1.52	1.2e-05	0.0003	-1.29	0.002	0.0187
ATF6	activating transcription factor 6	protein-coding	-1.52	8.23e-06	0.0002	-1.47	0.0004	0.0054
BCLAF1	BCL2 associated transcription factor 1	protein-coding	-1.52	3.55e-05	0.0006	-1.29	0.018	0.0888
LMNTD2	lamin tail domain containing 2	protein-coding	-1.52	7.61e-05	0.0011	-1.47	9.65e-05	0.0021
CHORDC1	cysteine and histidine rich domain containing 1	protein-coding	-1.52	0.0002	0.0024	-1.28	0.0283	0.1219
CPD	carboxypeptidase D	protein-coding	-1.52	9.18e-05	0.0013	-1.25	0.0118	0.0661
DLEU2L	deleted in lymphocytic leukemia 2 like	ncRNA	-1.52	6.56e-06	0.0002	-1.36	0.0007	0.0085
MRE11	MRE11 homolog, double strand break repair nuclease	protein-coding	-1.52	3.14e-05	0.0006	-1.34	0.0032	0.0266
N4BP2	NEDD4 binding protein 2	protein-coding	-1.52	9.12e-05	0.0013	-1.38	0.0005	0.0068
OTUD3	OTU deubiquitinase 3	protein-coding	-1.52	1.15e-05	0.0003	-1.36	0.0003	0.0048
PAIP1	poly(A) binding protein interacting protein 1	protein-coding	-1.52	1.69e-05	0.0004	-1.39	0.0005	0.0073
PCDHGB8P	protocadherin gamma subfamily B, 8 pseudogene	pseudo	-1.52	0.0003	0.0029	-1.31	0.0089	0.0545
POLG2	DNA polymerase gamma 2, accessory subunit	protein-coding	-1.52	0.0001	0.0019	-1.4	0.0003	0.0044
POM121	POM121 transmembrane nucleoporin	protein-coding	-1.52	8.22e-06	0.0002	-1.38	0.0006	0.0083
RBAK	RB associated KRAB zinc finger	protein-coding	-1.52	1.19e-07	8.12e-06	-1.29	0.0011	0.0122
RBM5	RNA binding motif protein 5	protein-coding	-1.52	6.46e-06	0.0002	-1.49	5.59e-05	0.0014
SEPTIN7	septin 7	protein-coding	-1.52	0.0001	0.0019	-1.34	0.0249	0.1112
SNAPC3	small nuclear RNA activating complex polypeptide 3	protein-coding	-1.52	0.0001	0.0017	-1.3	0.0109	0.0627
TET1	tet methylcytosine dioxygenase 1	protein-coding	-1.52	0.0006	0.0056	-1.34	0.0109	0.0626
LDAF1	lipid droplet assembly factor 1	protein-coding	-1.52	0.0002	0.0027	-1.49	0.0003	0.0052
TRANK1	tetratricopeptide repeat and ankyrin repeat containing 1	protein-coding	-1.52	0.0006	0.0056	-1.12	0.1723	0.4013
TSPYL6	TSPY like 6	protein-coding	-1.52	2.66e-06	8.42e-05	-1.48	7.45e-07	6.13e-05
UBXN2B	UBX domain protein 2B	protein-coding	-1.52	7.95e-06	0.0002	-1.34	0.001	0.0116
USP47	ubiquitin specific peptidase 47	protein-coding	-1.52	1.1e-06	4.14e-05	-1.32	0.0007	0.0087
YWHAQ	tyrosine 3-monooxygenase/tryptophan 5-monooxygenase activation protein theta	protein-coding	-1.52	0.0002	0.0028	-1.46	0.0029	0.0242
ZNF404	zinc finger protein 404	protein-coding	-1.52	0.0008	0.0069	-1.25	0.1085	0.2976
ZNF451	zinc finger protein 451	protein-coding	-1.52	2.04e-05	0.0004	-1.2	0.0206	0.0974
ZNF606	zinc finger protein 606	protein-coding	-1.52	0.0001	0.0015	-1.41	0.0003	0.0048
ALG5	ALG5 dolichyl-phosphate beta-glucosyltransferase	protein-coding	-1.51	1.31e-06	4.75e-05	-1.38	8.52e-05	0.002
CARF	calcium responsive transcription factor	protein-coding	-1.51	4.17e-05	0.0007	-1.48	0.0008	0.0096
ARGLU1	arginine and glutamate rich 1	protein-coding	-1.51	1.52e-08	1.8e-06	-1.39	1.37e-06	9.59e-05
ARID4A	AT-rich interaction domain 4A	protein-coding	-1.51	4.13e-07	1.98e-05	-1.23	0.0025	0.022
ASH2L	ASH2 like, histone lysine methyltransferase complex subunit	protein-coding	-1.51	1.71e-06	5.94e-05	-1.49	2.52e-06	0.0001
ATP2B1	ATPase plasma membrane Ca2+ transporting 1	protein-coding	-1.51	0.0012	0.0099	-1.25	0.0237	0.1075
EDRF1	erythroid differentiation regulatory factor 1	protein-coding	-1.51	4.95e-05	0.0008	-1.36	0.0005	0.0073
CASP8AP2	caspase 8 associated protein 2	protein-coding	-1.51	0.0002	0.0023	-1.32	0.0082	0.0512
CCDC18	coiled-coil domain containing 18	protein-coding	-1.51	2.39e-05	0.0005	-1.32	0.0006	0.0076
DNAJC25	DnaJ heat shock protein family (Hsp40) member C25	protein-coding	-1.51	1.1e-05	0.0003	-1.37	0.0007	0.0091
DOT1L	DOT1 like histone lysine methyltransferase	protein-coding	-1.51	8.87e-07	3.5e-05	-1.49	8.91e-07	6.94e-05
EPB41L1	erythrocyte membrane protein band 4.1 like 1	protein-coding	-1.51	0.0001	0.0017	-1.34	0.0036	0.0286
FEZ2	fasciculation and elongation protein zeta 2	protein-coding	-1.51	0.0004	0.0043	-1.31	0.0118	0.0661
FKSG29	FKSG29	ncRNA	-1.51	6.41e-05	0.001	-1.38	0.0011	0.0119
GMCL1	germ cell-less 1, spermatogenesis associated	protein-coding	-1.51	4.32e-07	2.05e-05	-1.36	5.4e-05	0.0014
HIF1A	hypoxia inducible factor 1 subunit alpha	protein-coding	-1.51	1.1e-06	4.14e-05	-1.29	0.003	0.0253
IDI1	isopentenyl-diphosphate delta isomerase 1	protein-coding	-1.51	4.27e-05	0.0007	-1.4	0.0008	0.0099
MYO6	myosin VI	protein-coding	-1.51	7.49e-06	0.0002	-1.35	0.0005	0.0068
NBPF14	NBPF member 14	protein-coding	-1.51	1.22e-05	0.0003	-1.38	0.0004	0.0054
NBPF9	NBPF member 9	protein-coding	-1.51	0.0006	0.0054	-1.33	0.0111	0.0631
NIPBL	NIPBL cohesin loading factor	protein-coding	-1.51	7.16e-06	0.0002	-1.19	0.034	0.1378
POLR2M	RNA polymerase II subunit M	protein-coding	-1.51	2.73e-08	2.73e-06	-1.25	3.21e-05	0.001
PSIP1	PC4 and SFRS1 interacting protein 1	protein-coding	-1.51	5.4e-05	0.0009	-1.31	0.0019	0.0176
PTCH1	patched 1	protein-coding	-1.51	0.0008	0.0067	-1.25	0.0207	0.0976
PTPN21	protein tyrosine phosphatase non-receptor type 21	protein-coding	-1.51	0.0001	0.0016	-1.48	0.0005	0.0065
RBM26	RNA binding motif protein 26	protein-coding	-1.51	6.83e-06	0.0002	-1.43	2.6e-05	0.0008
RFC1	replication factor C subunit 1	protein-coding	-1.51	5.92e-06	0.0002	-1.34	0.0062	0.042
RPE	ribulose-5-phosphate-3-epimerase	protein-coding	-1.51	1.31e-05	0.0003	-1.29	0.0053	0.0376
SLC38A2	solute carrier family 38 member 2	protein-coding	-1.51	0.0002	0.0028	-1.34	0.012	0.0669
SMARCC2	SWI/SNF related, matrix associated, actin dependent regulator of chromatin subfamily c member 2	protein-coding	-1.51	7.68e-06	0.0002	-1.3	0.0016	0.0159
STAG1	stromal antigen 1	protein-coding	-1.51	2.33e-07	1.31e-05	-1.25	0.0025	0.0217
TBC1D23	TBC1 domain family member 23	protein-coding	-1.51	1.9e-07	1.14e-05	-1.24	0.0041	0.0313
TBC1D8B	TBC1 domain family member 8B	protein-coding	-1.51	0.0003	0.0031	-1.39	0.001	0.0112
TOP2B	DNA topoisomerase II beta	protein-coding	-1.51	2.56e-05	0.0005	-1.3	0.0116	0.0653
TRIT1	tRNA isopentenyltransferase 1	protein-coding	-1.51	9.06e-05	0.0013	-1.4	0.0003	0.0053
ULK4	unc-51 like kinase 4	protein-coding	-1.51	2.28e-06	7.4e-05	-1.46	1.13e-05	0.0004
VTA1	vesicle trafficking 1	protein-coding	-1.51	5.34e-06	0.0001	-1.36	0.0002	0.0034
ZMAT2	zinc finger matrin-type 2	protein-coding	-1.51	7.29e-05	0.0011	-1.52	0.0031	0.0256
ZNF502	zinc finger protein 502	protein-coding	-1.51	2.17e-05	0.0004	-1.25	0.0232	0.1058
ZNF615	zinc finger protein 615	protein-coding	-1.51	0.0007	0.0062	-1.3	0.0146	0.0766
AMH	anti-Mullerian hormone	protein-coding	-1.5	3.35e-05	0.0006	-1.43	4.53e-06	0.0002
PGGHG	protein-glucosylgalactosylhydroxylysine glucosidase	protein-coding	-1.5	0.0001	0.0019	-1.29	0.0117	0.0659
C5orf15	chromosome 5 open reading frame 15	protein-coding	-1.5	2.81e-06	8.75e-05	-1.29	0.0013	0.0135
CCNG2	cyclin G2	protein-coding	-1.5	0.0006	0.0058	-1.22	0.0675	0.2172
COPB2	COPI coat complex subunit beta 2	protein-coding	-1.5	4.81e-05	0.0008	-1.4	0.0004	0.0056
DR1	down-regulator of transcription 1	protein-coding	-1.5	6.19e-06	0.0002	-1.36	0.0006	0.0076
DZIP3	DAZ interacting zinc finger protein 3	protein-coding	-1.5	0.0006	0.0059	-1.18	0.1599	0.3833
INTS6	integrator complex subunit 6	protein-coding	-1.5	0.0005	0.0052	-1.36	0.0033	0.0271
UMAD1	UBAP1-MVB12-associated (UMA) domain containing 1	protein-coding	-1.5	7.13e-07	3e-05	-1.39	5.44e-06	0.0003
MIA3	MIA SH3 domain ER export factor 3	protein-coding	-1.5	1.6e-05	0.0003	-1.17	0.028	0.121
PITHD1	PITH domain containing 1	protein-coding	-1.5	1.47e-05	0.0003	-1.47	3.16e-05	0.0009
PPP3CA	protein phosphatase 3 catalytic subunit alpha	protein-coding	-1.5	7.33e-05	0.0011	-1.37	0.0017	0.0166
PRCP	prolylcarboxypeptidase	protein-coding	-1.5	0.0001	0.0017	-1.48	0.0003	0.0051
RNF32	ring finger protein 32	protein-coding	-1.5	5.53e-05	0.0009	-1.42	9.78e-05	0.0021
TMEM178A	transmembrane protein 178A	protein-coding	-1.5	0.0005	0.0049	-1.3	0.019	0.092
TNFRSF1A	TNF receptor superfamily member 1A	protein-coding	-1.5	0.0009	0.008	-1.43	0.0091	0.0553
WDR55	WD repeat domain 55	protein-coding	-1.5	3.27e-08	3.14e-06	-1.41	7.61e-06	0.0003
ZNF439	zinc finger protein 439	protein-coding	-1.5	0.0002	0.0028	-1.4	0.0003	0.0042
PPIF	peptidylprolyl isomerase F	protein-coding	1.51	1.02e-05	0.0002	1.44	1.56e-05	0.0005
SH3BP1	SH3 domain binding protein 1	protein-coding	1.51	0.0012	0.0094	1.47	0.0004	0.0061
GLIPR2	GLI pathogenesis related 2	protein-coding	1.52	1.29e-05	0.0003	1.46	6.36e-05	0.0016
H4C11	H4 clustered histone 11	protein-coding	1.53	0.0002	0.0026	1.41	0.0115	0.0648
COL6A2	collagen type VI alpha 2 chain	protein-coding	1.54	6.47e-07	2.83e-05	1.43	3.63e-06	0.0002
GPT2	glutamic--pyruvic transaminase 2	protein-coding	1.56	0.0006	0.0055	1.43	0.0012	0.0131
NPAS2	neuronal PAS domain protein 2	protein-coding	1.6	0.0001	0.0016	1.44	0.0003	0.0044
CIB2	calcium and integrin binding family member 2	protein-coding	1.61	0.0004	0.0042	1.46	0.0029	0.0247
CPNE2	copine 2	protein-coding	1.63	1.67e-06	5.84e-05	1.45	4.52e-06	0.0002
LCTL	lactase like	protein-coding	1.69	0.0004	0.0037	1.5	0.002	0.0189
STAC	SH3 and cysteine rich domain	protein-coding	1.74	6.45e-05	0.001	1.48	8.29e-05	0.0019
ARHGEF19	Rho guanine nucleotide exchange factor 19	protein-coding	1.78	0.0001	0.0018	1.58	0.0014	0.0142
IGSF3	immunoglobulin superfamily member 3	protein-coding	1.83	0.0012	0.0098	1.63	0.0017	0.0163
LOXL3	lysyl oxidase like 3	protein-coding	1.92	7.28e-05	0.0011	1.62	0.0045	0.0336
								#REF!

## Sheet: hEDS-HSD vs control
Gene Symbol	GENENAME	GENETYPE	affected Avg (log2)	unaffected Avg (log2)	Fold Change	uncorrected p-value ≤0.01	FDR-adjusted p-value ≤0.01
PI16	peptidase inhibitor 16	protein-coding	3.05	6.08	-8.12	0.0001	0.0013
FOSB	FosB proto-oncogene, AP-1 transcription factor subunit	protein-coding	1.14	3.94	-6.93	8.61e-11	3.26e-08
IGFBP7	insulin like growth factor binding protein 7	protein-coding	5.75	8.25	-5.66	1.03e-08	1.19e-06
PAX8-AS1	PAX8 antisense RNA 1	ncRNA	2.23	4.43	-4.6	0.0004	0.0042
FOS	Fos proto-oncogene, AP-1 transcription factor subunit	protein-coding	3.48	5.66	-4.52	9.29e-09	1.12e-06
DEPTOR	DEP domain containing MTOR interacting protein	protein-coding	3.84	6	-4.47	6.41e-05	0.0009
KRT19	keratin 19	protein-coding	3.1	5.17	-4.19	1.02e-06	3.77e-05
GALNT12	polypeptide N-acetylgalactosaminyltransferase 12	protein-coding	1.68	3.69	-4.04	9.9e-08	6.28e-06
FRAS1	Fraser extracellular matrix complex subunit 1	protein-coding	3.3	5.29	-3.98	2.23e-08	2.08e-06
CACNB4	calcium voltage-gated channel auxiliary subunit beta 4	protein-coding	0.5	2.46	-3.88	7.83e-08	5.29e-06
USP53	ubiquitin specific peptidase 53	protein-coding	5.54	7.46	-3.81	2.29e-07	1.2e-05
NPR3	natriuretic peptide receptor 3	protein-coding	5.07	6.98	-3.74	6.81e-08	4.81e-06
SIK1	salt inducible kinase 1	protein-coding	2.3	4.21	-3.74	3.5e-10	9.3e-08
NEAT1	nuclear paraspeckle assembly transcript 1	ncRNA	7.45	9.35	-3.73	2.01e-14	8.74e-11
RDH10	retinol dehydrogenase 10	protein-coding	5.22	7.1	-3.68	1.67e-06	5.5e-05
TNXB	tenascin XB	protein-coding	3.45	5.31	-3.65	1.92e-05	0.0004
NR4A1	nuclear receptor subfamily 4 group A member 1	protein-coding	2.41	4.28	-3.65	1.95e-07	1.07e-05
NR4A2	nuclear receptor subfamily 4 group A member 2	protein-coding	1.19	3.03	-3.58	6.27e-08	4.5e-06
OXTR	oxytocin receptor	protein-coding	4.18	5.97	-3.48	9.27e-05	0.0012
TNXA	tenascin XA (pseudogene)	pseudo	1.94	3.74	-3.48	6.93e-07	2.85e-05
TMEM14EP	transmembrane protein 14E, pseudogene	pseudo	1.78	3.57	-3.46	1.77e-13	2.45e-10
GPRC5A	G protein-coupled receptor class C group 5 member A	protein-coding	2.75	4.52	-3.41	2.7e-06	8.06e-05
ABCA9	ATP binding cassette subfamily A member 9	protein-coding	2.79	4.49	-3.25	1.45e-06	4.91e-05
WNT2	Wnt family member 2	protein-coding	2.94	4.64	-3.25	2.14e-07	1.15e-05
COMP	cartilage oligomeric matrix protein	protein-coding	5.95	7.64	-3.23	0.0001	0.0018
MALL	mal, T cell differentiation protein like	protein-coding	2.47	4.15	-3.22	0.0002	0.0021
POSTN	periostin	protein-coding	7.95	9.63	-3.2	0.0004	0.0043
PTGIS	prostaglandin I2 synthase	protein-coding	6.85	8.52	-3.2	3.89e-05	0.0006
MEDAG	mesenteric estrogen dependent adipogenesis	protein-coding	4.25	5.9	-3.14	0.0008	0.007
SHROOM3	shroom family member 3	protein-coding	4.09	5.73	-3.11	4.6e-14	1.2e-10
SULF1	sulfatase 1	protein-coding	7.82	9.44	-3.08	8.49e-07	3.27e-05
ARHGAP20	Rho GTPase activating protein 20	protein-coding	1.78	3.39	-3.05	1.66e-07	9.56e-06
GRAMD2B	GRAM domain containing 2B	protein-coding	5.18	6.79	-3.05	1.37e-08	1.48e-06
NTN4	netrin 4	protein-coding	4.8	6.4	-3.04	0.0008	0.0069
BMP6	bone morphogenetic protein 6	protein-coding	2.24	3.84	-3.02	5.9e-08	4.29e-06
AKAP12	A-kinase anchoring protein 12	protein-coding	4.37	5.94	-2.97	7.43e-08	5.11e-06
LHX9	LIM homeobox 9	protein-coding	0.87	2.44	-2.96	5.52e-05	0.0008
LIMCH1	LIM and calponin homology domains 1	protein-coding	3.18	4.73	-2.93	1.65e-05	0.0003
COL14A1	collagen type XIV alpha 1 chain	protein-coding	1.89	3.42	-2.88	6.27e-07	2.63e-05
PLCE1-AS1	PLCE1 antisense RNA 1	ncRNA	0.46	1.97	-2.86	2.18e-07	1.16e-05
SRGN	serglycin	protein-coding	2.86	4.36	-2.84	0.0006	0.0057
MYH2	myosin heavy chain 2	protein-coding	0.81	2.31	-2.84	1.2e-05	0.0003
ERCC6	ERCC excision repair 6, chromatin remodeling factor	protein-coding	3.53	5.03	-2.82	2.17e-12	2.15e-09
CSF2RB	colony stimulating factor 2 receptor subunit beta	protein-coding	0.07	1.56	-2.81	1.72e-05	0.0003
CDH6	cadherin 6	protein-coding	2.27	3.76	-2.8	0.0006	0.0052
ID4	inhibitor of DNA binding 4, HLH protein	protein-coding	2	3.49	-2.8	6.71e-06	0.0002
ADAMTSL1	ADAMTS like 1	protein-coding	6.39	7.87	-2.79	0.0004	0.0038
LIMS2	LIM zinc finger domain containing 2	protein-coding	4.8	6.28	-2.79	4.58e-08	3.54e-06
GCNT1	glucosaminyl (N-acetyl) transferase 1	protein-coding	4.13	5.6	-2.79	3.83e-13	4.69e-10
ROR1	receptor tyrosine kinase like orphan receptor 1	protein-coding	3.99	5.47	-2.78	2.18e-07	1.16e-05
TENM3	teneurin transmembrane protein 3	protein-coding	3.93	5.4	-2.77	0.0004	0.0042
GOLGA8B	golgin A8 family member B	protein-coding	4.15	5.62	-2.77	1.36e-13	2.02e-10
FGL2	fibrinogen like 2	protein-coding	0.26	1.73	-2.76	0.0005	0.005
PRUNE2	prune homolog 2 with BCH domain	protein-coding	1.71	3.18	-2.76	2.33e-06	7.12e-05
MBP	myelin basic protein	protein-coding	0.97	2.41	-2.71	2.77e-07	1.38e-05
SGMS2	sphingomyelin synthase 2	protein-coding	4.35	5.78	-2.69	4.48e-12	3.22e-09
BHLHE40	basic helix-loop-helix family member e40	protein-coding	6.68	8.09	-2.66	2.81e-12	2.18e-09
DOCK11	dedicator of cytokinesis 11	protein-coding	4.34	5.75	-2.66	1.27e-12	1.39e-09
CRLF1	cytokine receptor like factor 1	protein-coding	4.12	5.52	-2.64	0.0003	0.0031
FZD4	frizzled class receptor 4	protein-coding	2.51	3.9	-2.63	2.31e-08	2.14e-06
TEK	TEK receptor tyrosine kinase	protein-coding	0.82	2.21	-2.61	1.85e-05	0.0004
HES1	hes family bHLH transcription factor 1	protein-coding	0.16	1.54	-2.6	3.38e-11	1.46e-08
TM4SF20	transmembrane 4 L six family member 20	protein-coding	0.48	1.85	-2.58	0.001	0.008
HAPLN3	hyaluronan and proteoglycan link protein 3	protein-coding	2.88	4.25	-2.57	2.15e-06	6.66e-05
KCTD16	potassium channel tetramerization domain containing 16	protein-coding	1.05	2.41	-2.56	5.66e-05	0.0009
CDKN2A	cyclin dependent kinase inhibitor 2A	protein-coding	0.88	2.23	-2.56	1.29e-05	0.0003
FAM126A	family with sequence similarity 126 member A	protein-coding	6.49	7.84	-2.54	3.51e-13	4.56e-10
ATP10D	ATPase phospholipid transporting 10D (putative)	protein-coding	3.85	5.19	-2.53	8.98e-13	1.04e-09
IGFBP5	insulin like growth factor binding protein 5	protein-coding	8.93	10.27	-2.52	0.0002	0.002
FAM133CP	family with sequence similarity 133, member A pseudogene	pseudo	1.39	2.73	-2.52	9.03e-09	1.12e-06
UTRN	utrophin	protein-coding	5.37	6.7	-2.52	2.51e-12	2.18e-09
CPA4	carboxypeptidase A4	protein-coding	4.07	5.4	-2.51	3.18e-05	0.0005
GULP1	GULP PTB domain containing engulfment adaptor 1	protein-coding	2.92	4.25	-2.51	1.43e-06	4.88e-05
GOLGB1	golgin B1	protein-coding	4.9	6.22	-2.51	4.35e-14	1.2e-10
ANO4	anoctamin 4	protein-coding	0.4	1.72	-2.5	6.48e-09	8.81e-07
KLF4	Kruppel like factor 4	protein-coding	4.28	5.6	-2.5	2.82e-09	4.48e-07
VCAN	versican	protein-coding	6.15	7.46	-2.49	1.32e-08	1.44e-06
RHOJ	ras homolog family member J	protein-coding	0.9	2.21	-2.49	2.14e-09	3.74e-07
ATP8B1	ATPase phospholipid transporting 8B1	protein-coding	4.56	5.88	-2.48	1.14e-09	2.35e-07
NEK7	NIMA related kinase 7	protein-coding	7.65	8.97	-2.48	1.23e-15	2.57e-11
PTPRQ	protein tyrosine phosphatase receptor type Q	protein-coding	1.3	2.6	-2.45	1.7e-08	1.75e-06
BST1	bone marrow stromal cell antigen 1	protein-coding	2.7	3.98	-2.44	5.5e-06	0.0001
FMN1	formin 1	protein-coding	3.59	4.88	-2.44	3.4e-07	1.62e-05
CD9	CD9 molecule	protein-coding	3.49	4.77	-2.43	0.0011	0.0089
NCKAP5	NCK associated protein 5	protein-coding	1.87	3.15	-2.43	7.64e-06	0.0002
BLID	BH3-like motif containing, cell death inducer	protein-coding	2.42	3.7	-2.43	4.21e-11	1.68e-08
HMGN1	high mobility group nucleosome binding domain 1	protein-coding	5.12	6.4	-2.42	2.18e-08	2.05e-06
TGFBR1	transforming growth factor beta receptor 1	protein-coding	6.17	7.44	-2.4	6.15e-10	1.42e-07
SEMA3C	semaphorin 3C	protein-coding	6.98	8.24	-2.39	4.45e-08	3.45e-06
ANKRD1	ankyrin repeat domain 1	protein-coding	0.76	2.01	-2.38	0.0002	0.0027
F2R	coagulation factor II thrombin receptor	protein-coding	2.27	3.52	-2.38	4.75e-05	0.0007
THSD4	thrombospondin type 1 domain containing 4	protein-coding	3.23	4.47	-2.36	2e-05	0.0004
LINC00312	long intergenic non-protein coding RNA 312	ncRNA	2.66	3.9	-2.36	1.43e-06	4.87e-05
UACA	uveal autoantigen with coiled-coil domains and ankyrin repeats	protein-coding	5.55	6.79	-2.36	2.67e-10	7.62e-08
PGBD3	piggyBac transposable element derived 3	protein-coding	2.76	3.99	-2.34	2.98e-11	1.38e-08
LRRC37A4P	leucine rich repeat containing 37 member A4, pseudogene	pseudo	1.4	2.63	-2.33	6.26e-06	0.0002
TENM3-AS1	TENM3 antisense RNA 1	ncRNA	2.12	3.32	-2.3	0.0004	0.0039
SCARNA5	small Cajal body-specific RNA 5	ncRNA	4.05	5.25	-2.3	1.48e-06	4.97e-05
MEST	mesoderm specific transcript	protein-coding	4.16	5.35	-2.28	0.0012	0.0092
VGLL3	vestigial like family member 3	protein-coding	7.95	9.14	-2.28	1.02e-08	1.18e-06
PLAAT3	phospholipase A and acyltransferase 3	protein-coding	3.71	4.89	-2.27	2.44e-05	0.0004
LYPD6B	LY6/PLAUR domain containing 6B	protein-coding	1.34	2.52	-2.26	0.0007	0.0061
ADGRG6	adhesion G protein-coupled receptor G6	protein-coding	1.6	2.78	-2.26	8.43e-05	0.0012
C11orf96	chromosome 11 open reading frame 96	protein-coding	1.34	2.51	-2.26	3.68e-05	0.0006
DNAJB4	DnaJ heat shock protein family (Hsp40) member B4	protein-coding	4.98	6.16	-2.26	4.95e-06	0.0001
PLK2	polo like kinase 2	protein-coding	4.28	5.45	-2.26	4.92e-09	7.17e-07
PKD2	polycystin 2, transient receptor potential cation channel	protein-coding	6.16	7.33	-2.26	5.82e-12	3.91e-09
CEMIP	cell migration inducing hyaluronidase 1	protein-coding	8.61	9.78	-2.25	1.18e-05	0.0003
SLC35E2A	solute carrier family 35 member E2A	pseudo	4.45	5.6	-2.22	1.42e-05	0.0003
DUSP1	dual specificity phosphatase 1	protein-coding	7.83	8.98	-2.22	1.36e-06	4.66e-05
NEXN	nexilin F-actin binding protein	protein-coding	5.02	6.17	-2.22	3.25e-11	1.44e-08
CAVIN2	caveolae associated protein 2	protein-coding	2.92	4.05	-2.2	0.0012	0.0091
ITPRIP	inositol 1,4,5-trisphosphate receptor interacting protein	protein-coding	1.4	2.54	-2.2	2.54e-09	4.15e-07
AKAP6	A-kinase anchoring protein 6	protein-coding	2.45	3.58	-2.19	0.0001	0.0018
NKTR	natural killer cell triggering receptor	protein-coding	3.37	4.5	-2.19	1.1e-13	1.77e-10
FMN2	formin 2	protein-coding	4.24	5.36	-2.18	1.53e-09	2.92e-07
TRPC4	transient receptor potential cation channel subfamily C member 4	protein-coding	2.62	3.73	-2.17	0.0002	0.0019
SNORA70G	small nucleolar RNA, H/ACA box 70G	snoRNA	3.79	4.9	-2.17	4.44e-07	2.02e-05
NLRP10	NLR family pyrin domain containing 10	protein-coding	1.34	2.45	-2.16	3.57e-05	0.0006
PDE5A	phosphodiesterase 5A	protein-coding	3.13	4.23	-2.15	0.0003	0.0028
NFYB	nuclear transcription factor Y subunit beta	protein-coding	4.63	5.74	-2.15	1.31e-08	1.44e-06
CSRNP1	cysteine and serine rich nuclear protein 1	protein-coding	2.91	4.01	-2.15	2.61e-09	4.24e-07
WNT4	Wnt family member 4	protein-coding	0.04	1.14	-2.14	1.47e-07	8.59e-06
EFEMP1	EGF containing fibulin extracellular matrix protein 1	protein-coding	8.72	9.81	-2.12	0.001	0.0078
CLIC4	chloride intracellular channel 4	protein-coding	9.46	10.54	-2.12	4.87e-10	1.16e-07
LENG8	leukocyte receptor cluster member 8	protein-coding	6.29	7.38	-2.12	5.39e-14	1.25e-10
GDF6	growth differentiation factor 6	protein-coding	1.65	2.73	-2.11	0.0002	0.002
FOXC2	forkhead box C2	protein-coding	1.04	2.11	-2.1	6.59e-07	2.74e-05
MID1	midline 1	protein-coding	2.66	3.73	-2.09	2.94e-05	0.0005
FABP3	fatty acid binding protein 3	protein-coding	0.74	1.8	-2.08	4.02e-05	0.0007
ITGBL1	integrin subunit beta like 1	protein-coding	7.81	8.87	-2.08	2.06e-08	1.98e-06
FAM66D	family with sequence similarity 66 member D	ncRNA	1.01	2.07	-2.08	3.54e-09	5.46e-07
MFGE8	milk fat globule EGF and factor V/VIII domain containing	protein-coding	8.35	9.4	-2.07	0.0001	0.0014
SLC7A5P2	solute carrier family 7 member 5 pseudogene 2	pseudo	2.14	3.18	-2.07	4.41e-08	3.44e-06
RECQL	RecQ like helicase	protein-coding	3.48	4.52	-2.07	5.96e-09	8.37e-07
LINC00641	long intergenic non-protein coding RNA 641	ncRNA	3.24	4.29	-2.07	3.27e-14	1.13e-10
SPTAN1	spectrin alpha, non-erythrocytic 1	protein-coding	7.36	8.41	-2.07	3.4e-15	3.53e-11
SAMD3	sterile alpha motif domain containing 3	protein-coding	1.6	2.64	-2.06	5.95e-05	0.0009
BCAT1	branched chain amino acid transaminase 1	protein-coding	5.94	6.98	-2.06	7.14e-07	2.91e-05
EBF1	EBF transcription factor 1	protein-coding	4.29	5.33	-2.06	9.35e-08	6.02e-06
MGAT5	alpha-1,6-mannosylglycoprotein 6-beta-N-acetylglucosaminyltransferase	protein-coding	3.76	4.8	-2.06	5.89e-09	8.34e-07
CCDC80	coiled-coil domain containing 80	protein-coding	5.75	6.79	-2.05	6.62e-09	8.82e-07
UBE2Q2P1	ubiquitin conjugating enzyme E2 Q2 pseudogene 1	pseudo	3.06	4.09	-2.05	1.92e-11	1.08e-08
SNORA27	small nucleolar RNA, H/ACA box 27	snoRNA	3.92	4.95	-2.04	4.69e-06	0.0001
SNORA70B	small nucleolar RNA, H/ACA box 70B	snoRNA	1.08	2.1	-2.04	2e-10	6.06e-08
OSR2	odd-skipped related transciption factor 2	protein-coding	2.27	3.29	-2.03	0.0005	0.0047
OLR1	oxidized low density lipoprotein receptor 1	protein-coding	0.77	1.79	-2.03	0.0001	0.0017
FZD8	frizzled class receptor 8	protein-coding	2	3.02	-2.03	5.2e-06	0.0001
RGS2	regulator of G protein signaling 2	protein-coding	1	2.02	-2.03	3.06e-08	2.61e-06
LMO7	LIM domain 7	protein-coding	7.77	8.79	-2.03	2.59e-08	2.31e-06
FAT1	FAT atypical cadherin 1	protein-coding	7.12	8.14	-2.02	8.67e-08	5.62e-06
VPS13A	vacuolar protein sorting 13 homolog A	protein-coding	3.61	4.62	-2.02	7.8e-09	1e-06
LINC02969	long intergenic non-protein coding RNA 2969	ncRNA	2.06	3.07	-2.02	1.53e-09	2.92e-07
THAP9-AS1	THAP9 antisense RNA 1	ncRNA	5.49	6.5	-2.02	9.5e-10	2.1e-07
STK38	serine/threonine kinase 38	protein-coding	4.86	5.88	-2.02	8.16e-14	1.41e-10
USP17L2	ubiquitin specific peptidase 17 like family member 2	protein-coding	1.18	2.19	-2.01	1.82e-07	1.01e-05
FRY	FRY microtubule binding protein	protein-coding	3.6	4.6	-2	0.0001	0.0015
OSR1	odd-skipped related transcription factor 1	protein-coding	4.36	5.36	-2	4.67e-06	0.0001
ABCA5	ATP binding cassette subfamily A member 5	protein-coding	3.45	4.44	-1.99	3.77e-06	0.0001
BTG2	BTG anti-proliferation factor 2	protein-coding	2.56	3.56	-1.99	1.26e-06	4.41e-05
LOC90246	uncharacterized LOC90246	ncRNA	1.1	2.09	-1.99	7.31e-07	2.96e-05
DGKI	diacylglycerol kinase iota	protein-coding	1.79	2.78	-1.99	6.16e-07	2.61e-05
RPL13AP6	ribosomal protein L13a pseudogene 6	pseudo	1.13	2.12	-1.99	9.14e-09	1.12e-06
PEAK1	pseudopodium enriched atypical kinase 1	protein-coding	6.61	7.61	-1.99	5.25e-12	3.64e-09
MGARP	mitochondria localized glutamic acid rich protein	protein-coding	2.47	3.46	-1.98	0.0007	0.0061
PRSS12	serine protease 12	protein-coding	5.33	6.32	-1.98	1.06e-05	0.0002
DST	dystonin	protein-coding	6.8	7.78	-1.98	9.69e-08	6.16e-06
FLJ42393	uncharacterized LOC401105	ncRNA	1.39	2.38	-1.98	5.83e-09	8.31e-07
DSP	desmoplakin	protein-coding	6.02	7	-1.97	0.0012	0.009
LRRC2	leucine rich repeat containing 2	protein-coding	3.11	4.09	-1.97	0.0002	0.0019
RECK	reversion inducing cysteine rich protein with kazal motifs	protein-coding	7.65	8.62	-1.97	4.87e-05	0.0008
LINC01133	long intergenic non-protein coding RNA 1133	ncRNA	4.45	5.43	-1.97	1.56e-05	0.0003
NALCN	sodium leak channel, non-selective	protein-coding	1.49	2.47	-1.97	9.2e-06	0.0002
SORT1	sortilin 1	protein-coding	4.53	5.51	-1.97	4.85e-06	0.0001
SNORA70F	small nucleolar RNA, H/ACA box 70F	snoRNA	0.48	1.46	-1.97	3.63e-07	1.71e-05
SETD7	SET domain containing 7, histone lysine methyltransferase	protein-coding	6.32	7.3	-1.97	2.66e-11	1.26e-08
KMT2A	lysine methyltransferase 2A	protein-coding	5.2	6.19	-1.97	1.29e-11	7.47e-09
HEATR5A	HEAT repeat containing 5A	protein-coding	4.61	5.59	-1.97	1.24e-11	7.36e-09
PITX2	paired like homeodomain 2	protein-coding	1.46	2.43	-1.96	0.0002	0.0023
FZD6	frizzled class receptor 6	protein-coding	4.85	5.82	-1.96	1.03e-06	3.82e-05
MTHFD1L	methylenetetrahydrofolate dehydrogenase (NADP+ dependent) 1 like	protein-coding	5.71	6.69	-1.96	2.1e-14	8.74e-11
NUAK1	NUAK family kinase 1	protein-coding	5.07	6.03	-1.94	1.61e-05	0.0003
CBLB	Cbl proto-oncogene B	protein-coding	3.79	4.75	-1.94	6.83e-07	2.83e-05
ARHGAP5	Rho GTPase activating protein 5	protein-coding	5.7	6.65	-1.94	2.41e-12	2.18e-09
FER1L4	fer-1 like family member 4 (pseudogene)	pseudo	2.29	3.24	-1.93	0.0002	0.0027
RASSF2	Ras association domain family member 2	protein-coding	2.35	3.3	-1.93	5.81e-05	0.0009
ABCA10	ATP binding cassette subfamily A member 10	protein-coding	0.99	1.93	-1.93	2.98e-06	8.73e-05
ANKH	ANKH inorganic pyrophosphate transport regulator	protein-coding	4.32	5.27	-1.93	5.53e-07	2.39e-05
MBNL2	muscleblind like splicing regulator 2	protein-coding	7.31	8.26	-1.93	2.24e-07	1.19e-05
LRRFIP1	LRR binding FLII interacting protein 1	protein-coding	5.82	6.77	-1.93	3.16e-08	2.67e-06
OPTN	optineurin	protein-coding	5.95	6.9	-1.93	1.22e-09	2.47e-07
PCSK6	proprotein convertase subtilisin/kexin type 6	protein-coding	0.53	1.47	-1.92	0.001	0.008
OLFM1	olfactomedin 1	protein-coding	2.62	3.56	-1.92	0.0002	0.0025
MPRIP	myosin phosphatase Rho interacting protein	protein-coding	6.64	7.59	-1.92	8.19e-08	5.42e-06
CRYGS	crystallin gamma S	protein-coding	0.88	1.82	-1.92	2.59e-11	1.25e-08
RNF150	ring finger protein 150	protein-coding	4.24	5.17	-1.91	7.44e-05	0.001
KLF2	Kruppel like factor 2	protein-coding	3.43	4.36	-1.91	5.19e-05	0.0008
PARD3B	par-3 family cell polarity regulator beta	protein-coding	4.46	5.39	-1.91	1.55e-05	0.0003
FNIP2	folliculin interacting protein 2	protein-coding	3.91	4.84	-1.91	2.39e-08	2.16e-06
PTPN12	protein tyrosine phosphatase non-receptor type 12	protein-coding	6.35	7.28	-1.91	2.21e-08	2.07e-06
HSPH1	heat shock protein family H (Hsp110) member 1	protein-coding	3.52	4.45	-1.91	1.64e-08	1.71e-06
TAS2R14	taste 2 receptor member 14	protein-coding	2	2.93	-1.91	8.9e-11	3.31e-08
SLC7A6	solute carrier family 7 member 6	protein-coding	3.77	4.7	-1.91	7.11e-14	1.41e-10
SAMD12	sterile alpha motif domain containing 12	protein-coding	0.96	1.89	-1.9	0.0001	0.0014
PER1	period circadian regulator 1	protein-coding	5.11	6.03	-1.9	5.16e-06	0.0001
N4BP2L2	NEDD4 binding protein 2 like 2	protein-coding	3.57	4.5	-1.9	3.48e-07	1.65e-05
ATXN2	ataxin 2	protein-coding	5.78	6.7	-1.9	1.85e-09	3.32e-07
AHNAK2	AHNAK nucleoprotein 2	protein-coding	5.7	6.62	-1.89	0.0004	0.0042
DYNLT4	dynein light chain Tctex-type 4	protein-coding	1.8	2.73	-1.89	1.12e-06	4.01e-05
KLF10	Kruppel like factor 10	protein-coding	5.06	5.98	-1.89	1.05e-06	3.88e-05
TAS2R19	taste 2 receptor member 19	protein-coding	1.48	2.4	-1.89	5.16e-08	3.92e-06
GNPTAB	N-acetylglucosamine-1-phosphate transferase subunits alpha and beta	protein-coding	4.16	5.08	-1.89	2.39e-08	2.16e-06
AHSA2P	activator of HSP90 ATPase homolog 2, pseudogene	pseudo	3.82	4.74	-1.89	4.96e-09	7.17e-07
AFAP1	actin filament associated protein 1	protein-coding	5.62	6.53	-1.89	7.65e-14	1.41e-10
LPCAT2	lysophosphatidylcholine acyltransferase 2	protein-coding	3.82	4.73	-1.88	1.26e-05	0.0003
XG	Xg glycoprotein (Xg blood group)	protein-coding	2.7	3.61	-1.88	1.13e-05	0.0002
FERMT2	FERM domain containing kindlin 2	protein-coding	7	7.91	-1.88	8.3e-07	3.23e-05
PLEKHG3	pleckstrin homology and RhoGEF domain containing G3	protein-coding	2.07	2.98	-1.88	1.41e-07	8.28e-06
PABPC1L	poly(A) binding protein cytoplasmic 1 like	protein-coding	2.44	3.35	-1.88	4.05e-10	1.03e-07
MPHOSPH8	M-phase phosphoprotein 8	protein-coding	4.39	5.3	-1.88	2.83e-10	7.94e-08
ZFC3H1	zinc finger C3H1-type containing	protein-coding	3.92	4.84	-1.88	6.79e-11	2.67e-08
RALGAPA1	Ral GTPase activating protein catalytic subunit alpha 1	protein-coding	2.9	3.81	-1.88	9.85e-12	6.21e-09
RABGEF1	RAB guanine nucleotide exchange factor 1	protein-coding	4.68	5.59	-1.88	1.14e-14	7.94e-11
FOXE1	forkhead box E1	protein-coding	0.02	0.92	-1.87	0.0005	0.0044
MAP3K7CL	MAP3K7 C-terminal like	protein-coding	4.3	5.2	-1.87	0.0001	0.0017
PDLIM5	PDZ and LIM domain 5	protein-coding	6.08	6.98	-1.87	2.59e-05	0.0005
DPF3	double PHD fingers 3	protein-coding	1.79	2.69	-1.87	1.59e-05	0.0003
SNAI1	snail family transcriptional repressor 1	protein-coding	4.32	5.23	-1.87	4.39e-06	0.0001
SSB	small RNA binding exonuclease protection factor La	protein-coding	5.29	6.19	-1.87	3.81e-08	3.09e-06
SLC36A1	solute carrier family 36 member 1	protein-coding	3.34	4.24	-1.87	3.39e-08	2.79e-06
NDFIP2	Nedd4 family interacting protein 2	protein-coding	4.63	5.53	-1.87	2.09e-08	1.99e-06
PLK3	polo like kinase 3	protein-coding	3.36	4.26	-1.87	1.32e-08	1.44e-06
RASSF8-AS1	RASSF8 antisense RNA 1	ncRNA	2.76	3.67	-1.87	4.06e-09	6.12e-07
PFN1P2	profilin 1 pseudogene 2	pseudo	2.95	3.86	-1.87	2.5e-09	4.13e-07
CHMP1B	charged multivesicular body protein 1B	protein-coding	6.35	7.25	-1.87	3.33e-10	9.11e-08
LINC00672	long intergenic non-protein coding RNA 672	ncRNA	0.92	1.82	-1.87	1.65e-10	5.43e-08
CDH10	cadherin 10	protein-coding	0.49	1.38	-1.86	0.0008	0.0069
SULF2	sulfatase 2	protein-coding	4.51	5.41	-1.86	0.0006	0.0053
VEPH1	ventricular zone expressed PH domain containing 1	protein-coding	3.11	4.01	-1.86	0.0004	0.0043
ATF3	activating transcription factor 3	protein-coding	2.75	3.64	-1.86	0.0002	0.0025
PTK2B	protein tyrosine kinase 2 beta	protein-coding	3.11	4.01	-1.86	9.55e-05	0.0013
TMEM11	transmembrane protein 11	protein-coding	3.32	4.21	-1.86	3.99e-05	0.0007
VTN	vitronectin	protein-coding	0.51	1.4	-1.86	8.66e-06	0.0002
C1orf198	chromosome 1 open reading frame 198	protein-coding	7	7.9	-1.86	6.67e-06	0.0002
CYCSP52	CYCS pseudogene 52	pseudo	0.81	1.7	-1.86	2.74e-09	4.38e-07
SYT12	synaptotagmin 12	protein-coding	0.01	0.9	-1.86	1.55e-09	2.93e-07
RPGRIP1L	RPGRIP1 like	protein-coding	2.89	3.79	-1.86	1.67e-10	5.43e-08
ARID4B	AT-rich interaction domain 4B	protein-coding	4.21	5.11	-1.86	8.61e-12	5.6e-09
PLXNA2	plexin A2	protein-coding	3.38	4.27	-1.85	7.82e-05	0.0011
CREBRF	CREB3 regulatory factor	protein-coding	5.18	6.07	-1.85	2.04e-05	0.0004
FSTL3	follistatin like 3	protein-coding	4.78	5.67	-1.85	2.02e-05	0.0004
CUL4B	cullin 4B	protein-coding	7.34	8.23	-1.85	2.42e-07	1.25e-05
TMEM117	transmembrane protein 117	protein-coding	3.18	4.07	-1.85	5.3e-08	4e-06
STK32B	serine/threonine kinase 32B	protein-coding	3.2	4.08	-1.84	0.0011	0.009
LOC145474	uncharacterized LOC145474	ncRNA	0.52	1.4	-1.84	2.36e-08	2.16e-06
GALNT7	polypeptide N-acetylgalactosaminyltransferase 7	protein-coding	3.58	4.46	-1.84	8.13e-09	1.03e-06
PTAR1	protein prenyltransferase alpha subunit repeat containing 1	protein-coding	3.7	4.59	-1.84	2.88e-09	4.55e-07
CCNL2	cyclin L2	protein-coding	4.62	5.5	-1.84	1.13e-09	2.35e-07
RPL21P44	ribosomal protein L21 pseudogene 44	pseudo	0.3	1.18	-1.84	2.57e-12	2.18e-09
PCDHB13	protocadherin beta 13	protein-coding	2.38	3.25	-1.83	0.001	0.0078
ZMAT3	zinc finger matrin-type 3	protein-coding	5.54	6.41	-1.83	0.0001	0.0018
TAS2R20	taste 2 receptor member 20	protein-coding	0.81	1.68	-1.83	2.36e-08	2.16e-06
SEMA5A	semaphorin 5A	protein-coding	6.08	6.95	-1.82	0.0013	0.01
ANKRD29	ankyrin repeat domain 29	protein-coding	1.24	2.11	-1.82	4.31e-06	0.0001
HES4	hes family bHLH transcription factor 4	protein-coding	0.95	1.82	-1.82	3.38e-06	9.63e-05
NNMT	nicotinamide N-methyltransferase	protein-coding	8.29	9.15	-1.82	3.32e-07	1.59e-05
SEMA4A	semaphorin 4A	protein-coding	1.61	2.47	-1.82	2.73e-07	1.37e-05
ANKIB1	ankyrin repeat and IBR domain containing 1	protein-coding	5.86	6.73	-1.82	8.29e-08	5.46e-06
GLS	glutaminase	protein-coding	8.32	9.19	-1.82	1.87e-08	1.85e-06
ZNF84	zinc finger protein 84	protein-coding	3.47	4.33	-1.82	2.24e-09	3.84e-07
SETX	senataxin	protein-coding	5.36	6.22	-1.82	1.41e-09	2.77e-07
SRSF5	serine and arginine rich splicing factor 5	protein-coding	7.76	8.63	-1.82	2.34e-11	1.16e-08
ADARB1	adenosine deaminase RNA specific B1	protein-coding	4.9	5.76	-1.81	0.0009	0.0075
LOC392196	ubiquitin specific peptidase 17 like family member 2 pseudogene	pseudo	1.44	2.3	-1.81	0.0002	0.0027
CMAHP	cytidine monophospho-N-acetylneuraminic acid hydroxylase, pseudogene	pseudo	2.22	3.08	-1.81	8.45e-05	0.0012
LDHAL6B	lactate dehydrogenase A like 6B	protein-coding	1.99	2.84	-1.81	3.85e-05	0.0006
CALD1	caldesmon 1	protein-coding	9.11	9.96	-1.81	1.98e-05	0.0004
PLEKHA3	pleckstrin homology domain containing A3	protein-coding	4.13	4.98	-1.81	8.51e-06	0.0002
NEK10	NIMA related kinase 10	protein-coding	1.97	2.83	-1.81	1.98e-06	6.26e-05
SKIL	SKI like proto-oncogene	protein-coding	6.02	6.87	-1.81	9.63e-07	3.62e-05
SLC7A5P1	solute carrier family 7 member 5 pseudogene 1	pseudo	2.87	3.73	-1.81	2.9e-08	2.52e-06
SCARNA17	small Cajal body-specific RNA 17	ncRNA	5.5	6.35	-1.81	9.11e-09	1.12e-06
GGCT	gamma-glutamylcyclotransferase	protein-coding	3.41	4.26	-1.81	8.8e-09	1.1e-06
PIGA	phosphatidylinositol glycan anchor biosynthesis class A	protein-coding	2.2	3.06	-1.81	1.93e-10	6.06e-08
PRR14L	proline rich 14 like	protein-coding	4.14	4.99	-1.81	1.17e-10	4.04e-08
TTC37	tetratricopeptide repeat domain 37	protein-coding	4.8	5.65	-1.8	2.02e-06	6.37e-05
FOXO1	forkhead box O1	protein-coding	3.08	3.93	-1.8	1.95e-07	1.07e-05
ORMDL1	ORMDL sphingolipid biosynthesis regulator 1	protein-coding	4.14	4.99	-1.8	1.67e-09	3.11e-07
TMTC2	transmembrane O-mannosyltransferase targeting cadherins 2	protein-coding	1.8	2.64	-1.79	0.0009	0.0073
LAMA3	laminin subunit alpha 3	protein-coding	1.15	1.99	-1.79	0.0008	0.007
ABCA6	ATP binding cassette subfamily A member 6	protein-coding	3.35	4.19	-1.79	0.0004	0.004
STK38L	serine/threonine kinase 38 like	protein-coding	3.84	4.68	-1.79	8.66e-05	0.0012
LANCL1	LanC like 1	protein-coding	4.8	5.64	-1.79	1.83e-06	5.87e-05
PHLDB2	pleckstrin homology like domain family B member 2	protein-coding	3.78	4.62	-1.79	1.68e-06	5.51e-05
RGPD2	RANBP2 like and GRIP domain containing 2	protein-coding	-0.04	0.8	-1.79	4.95e-07	2.2e-05
ZNF10	zinc finger protein 10	protein-coding	0.91	1.75	-1.79	1.31e-09	2.59e-07
TDRD3	tudor domain containing 3	protein-coding	4.52	5.36	-1.79	2.6e-10	7.62e-08
EP300	E1A binding protein p300	protein-coding	3.96	4.8	-1.79	3.15e-11	1.42e-08
IFIT2	interferon induced protein with tetratricopeptide repeats 2	protein-coding	3.09	3.93	-1.78	0.0009	0.0075
RGPD1	RANBP2 like and GRIP domain containing 1	protein-coding	0.62	1.45	-1.78	0.0002	0.0027
SAMD9	sterile alpha motif domain containing 9	protein-coding	2.13	2.96	-1.78	6.6e-05	0.001
SH3BP5	SH3 domain binding protein 5	protein-coding	5.49	6.33	-1.78	2.86e-05	0.0005
CLIP4	CAP-Gly domain containing linker protein family member 4	protein-coding	5.41	6.24	-1.78	1.1e-05	0.0002
DDX60L	DExD/H-box 60 like	protein-coding	3.66	4.49	-1.78	1.67e-07	9.56e-06
FHL2	four and a half LIM domains 2	protein-coding	7.94	8.78	-1.78	4.62e-08	3.56e-06
ZFR	zinc finger RNA binding protein	protein-coding	5.7	6.53	-1.78	2.16e-08	2.04e-06
TAS2R30	taste 2 receptor member 30	protein-coding	0.51	1.34	-1.78	1.93e-08	1.89e-06
WWC3	WWC family member 3	protein-coding	4.52	5.35	-1.78	1.91e-08	1.88e-06
KMT2C	lysine methyltransferase 2C	protein-coding	3.89	4.72	-1.78	1.14e-11	6.98e-09
MYO1E	myosin IE	protein-coding	6.57	7.39	-1.77	0.0006	0.0055
CHN2	chimerin 2	protein-coding	0.12	0.94	-1.77	0.0003	0.0032
MAMLD1	mastermind like domain containing 1	protein-coding	3.78	4.6	-1.77	4.28e-05	0.0007
STAMBPL1	STAM binding protein like 1	protein-coding	3.1	3.92	-1.77	6.29e-06	0.0002
JAK1	Janus kinase 1	protein-coding	6.96	7.78	-1.77	6.01e-06	0.0002
PPP1CC	protein phosphatase 1 catalytic subunit gamma	protein-coding	6.51	7.33	-1.77	5.83e-07	2.49e-05
CHPF	chondroitin polymerizing factor	protein-coding	6.95	7.77	-1.77	3.95e-07	1.83e-05
ARHGAP12	Rho GTPase activating protein 12	protein-coding	3.6	4.43	-1.77	2.45e-07	1.26e-05
SRGAP2B	SLIT-ROBO Rho GTPase activating protein 2B	protein-coding	1.28	2.11	-1.77	1.24e-07	7.57e-06
FRS2	fibroblast growth factor receptor substrate 2	protein-coding	4.73	5.55	-1.77	1.12e-09	2.35e-07
MED23	mediator complex subunit 23	protein-coding	2.82	3.64	-1.77	4.93e-10	1.17e-07
BTBD1	BTB domain containing 1	protein-coding	6.79	7.62	-1.77	2.01e-10	6.06e-08
HRCT1	histidine rich carboxyl terminus 1	protein-coding	1.15	1.96	-1.76	0.0002	0.0026
MAP3K1	mitogen-activated protein kinase kinase kinase 1	protein-coding	3.17	3.99	-1.76	1.9e-05	0.0004
ATRX	ATRX chromatin remodeler	protein-coding	4	4.81	-1.76	1.44e-06	4.88e-05
PCYOX1	prenylcysteine oxidase 1	protein-coding	5.95	6.77	-1.76	3.39e-07	1.62e-05
PILRB	paired immunoglobin like type 2 receptor beta	protein-coding	2.89	3.7	-1.76	6.58e-09	8.82e-07
ZRANB2	zinc finger RANBP2-type containing 2	protein-coding	2.05	2.86	-1.76	7.01e-10	1.58e-07
NFIB	nuclear factor I B	protein-coding	2.09	2.9	-1.75	0.0008	0.0071
CEP126	centrosomal protein 126	protein-coding	3.13	3.93	-1.75	0.0001	0.0016
PLEKHH2	pleckstrin homology, MyTH4 and FERM domain containing H2	protein-coding	2.11	2.92	-1.75	1.08e-06	3.95e-05
CAPN3	calpain 3	protein-coding	1.85	2.65	-1.75	2.86e-08	2.5e-06
KAZALD1	Kazal type serine peptidase inhibitor domain 1	protein-coding	2.01	2.81	-1.74	0.0005	0.005
KIF5B	kinesin family member 5B	protein-coding	7.58	8.39	-1.74	8.52e-05	0.0012
KIAA1671	KIAA1671	protein-coding	0.91	1.71	-1.74	2.2e-05	0.0004
INTU	inturned planar cell polarity protein	protein-coding	2.71	3.51	-1.74	6.32e-06	0.0002
MRPS30	mitochondrial ribosomal protein S30	protein-coding	4.55	5.35	-1.74	2.25e-06	6.93e-05
ATP6V0A1	ATPase H+ transporting V0 subunit a1	protein-coding	4.51	5.31	-1.74	1.15e-06	4.07e-05
LINC00597	long intergenic non-protein coding RNA 597	ncRNA	0.9	1.7	-1.74	1.06e-06	3.89e-05
MAP2K3	mitogen-activated protein kinase kinase 3	protein-coding	5.1	5.9	-1.74	8.19e-07	3.2e-05
GIGYF2	GRB10 interacting GYF protein 2	protein-coding	5.38	6.18	-1.74	5.51e-08	4.13e-06
EFHC1	EF-hand domain containing 1	protein-coding	2.87	3.67	-1.74	6.69e-09	8.82e-07
TENT2	terminal nucleotidyltransferase 2	protein-coding	4.52	5.32	-1.74	3.09e-09	4.8e-07
AHI1	Abelson helper integration site 1	protein-coding	3.75	4.55	-1.74	1.28e-09	2.57e-07
NFIA	nuclear factor I A	protein-coding	3.61	4.4	-1.73	0.0002	0.0027
CCN2	cellular communication network factor 2	protein-coding	10.19	10.98	-1.73	0.0002	0.0025
CCNL1	cyclin L1	protein-coding	4.53	5.32	-1.73	0.0002	0.0019
EID3	EP300 interacting inhibitor of differentiation 3	protein-coding	2.88	3.67	-1.73	2.09e-05	0.0004
ZEB1	zinc finger E-box binding homeobox 1	protein-coding	5.84	6.63	-1.73	1.29e-05	0.0003
BLZF1	basic leucine zipper nuclear factor 1	protein-coding	4.72	5.51	-1.73	5.38e-06	0.0001
CBX1	chromobox 1	protein-coding	2.15	2.95	-1.73	2.14e-06	6.66e-05
CDC73	cell division cycle 73	protein-coding	4.71	5.5	-1.73	4.45e-07	2.02e-05
GDPD5	glycerophosphodiester phosphodiesterase domain containing 5	protein-coding	2.59	3.37	-1.73	1.91e-07	1.06e-05
ANKRD44	ankyrin repeat domain 44	protein-coding	1.8	2.59	-1.73	5.69e-08	4.22e-06
DCUN1D1	defective in cullin neddylation 1 domain containing 1	protein-coding	4.61	5.39	-1.73	3.38e-08	2.79e-06
JMJD1C	jumonji domain containing 1C	protein-coding	4.04	4.83	-1.73	3.17e-08	2.67e-06
EPRS1	glutamyl-prolyl-tRNA synthetase 1	protein-coding	7.09	7.88	-1.73	2.58e-08	2.31e-06
DCAF13P3	DDB1 and CUL4 associated factor 13 pseudogene 3	pseudo	0.87	1.66	-1.73	2.49e-08	2.24e-06
GANC	glucosidase alpha, neutral C	protein-coding	3.21	4	-1.73	1.1e-09	2.33e-07
PRPF18	pre-mRNA processing factor 18	protein-coding	3.4	4.2	-1.73	2.12e-11	1.13e-08
SOD3	superoxide dismutase 3	protein-coding	5.03	5.81	-1.72	0.001	0.0081
ACVR2A	activin A receptor type 2A	protein-coding	5.16	5.95	-1.72	0.0005	0.0046
NEDD9	neural precursor cell expressed, developmentally down-regulated 9	protein-coding	4.33	5.11	-1.72	0.0002	0.0027
SYNM	synemin	protein-coding	1.97	2.74	-1.72	1.13e-06	4.04e-05
ADAM9	ADAM metallopeptidase domain 9	protein-coding	7.05	7.83	-1.72	2.03e-07	1.11e-05
SMG1P3	SMG1 pseudogene 3	pseudo	5.51	6.29	-1.72	6.81e-08	4.81e-06
GLIS2	GLIS family zinc finger 2	protein-coding	5.44	6.22	-1.72	2.94e-08	2.54e-06
PCGF5	polycomb group ring finger 5	protein-coding	3.99	4.78	-1.72	1.87e-08	1.85e-06
SYDE2	synapse defective Rho GTPase homolog 2	protein-coding	2.24	3.02	-1.72	1.29e-08	1.44e-06
FTX	FTX transcript, XIST regulator	ncRNA	4.88	5.66	-1.72	4.46e-09	6.63e-07
RIOK2	RIO kinase 2	protein-coding	4.06	4.85	-1.72	4.04e-09	6.12e-07
ZNF300	zinc finger protein 300	protein-coding	1.93	2.71	-1.72	3.46e-10	9.3e-08
BIRC6	baculoviral IAP repeat containing 6	protein-coding	5.04	5.82	-1.72	3.72e-11	1.55e-08
DDX5	DEAD-box helicase 5	protein-coding	8.16	8.94	-1.72	1.87e-12	1.95e-09
HSPA4L	heat shock protein family A (Hsp70) member 4 like	protein-coding	1.97	2.75	-1.71	0.001	0.0083
NGEF	neuronal guanine nucleotide exchange factor	protein-coding	0.09	0.87	-1.71	0.0005	0.0047
KLF9	Kruppel like factor 9	protein-coding	5.02	5.8	-1.71	0.0002	0.0021
MUC1	mucin 1, cell surface associated	protein-coding	3.47	4.24	-1.71	6.59e-06	0.0002
BTBD3	BTB domain containing 3	protein-coding	3.66	4.44	-1.71	5.13e-06	0.0001
CCNH	cyclin H	protein-coding	3.81	4.58	-1.71	1.88e-06	6e-05
LINC01347	long intergenic non-protein coding RNA 1347	ncRNA	2.52	3.29	-1.71	2.13e-07	1.15e-05
MAP4K5	mitogen-activated protein kinase kinase kinase kinase 5	protein-coding	4.59	5.36	-1.71	3.61e-08	2.94e-06
CPLANE1	ciliogenesis and planar polarity effector 1	protein-coding	4.37	5.15	-1.71	1.8e-09	3.25e-07
DOCK7	dedicator of cytokinesis 7	protein-coding	5.46	6.23	-1.71	3.97e-10	1.02e-07
ZNF708	zinc finger protein 708	protein-coding	2.87	3.65	-1.71	1.99e-11	1.09e-08
MDM2	MDM2 proto-oncogene	protein-coding	5.69	6.45	-1.7	1.92e-05	0.0004
FNBP1L	formin binding protein 1 like	protein-coding	3.88	4.65	-1.7	8.13e-06	0.0002
INSIG2	insulin induced gene 2	protein-coding	4	4.77	-1.7	3.92e-07	1.83e-05
TPR	translocated promoter region, nuclear basket protein	protein-coding	5.99	6.76	-1.7	1.4e-07	8.28e-06
DPP8	dipeptidyl peptidase 8	protein-coding	3.87	4.64	-1.7	6.61e-08	4.72e-06
UBR1	ubiquitin protein ligase E3 component n-recognin 1	protein-coding	3.59	4.35	-1.7	5.79e-08	4.26e-06
LRRC41	leucine rich repeat containing 41	protein-coding	4.41	5.17	-1.7	1.73e-08	1.77e-06
LRRK2	leucine rich repeat kinase 2	protein-coding	2.48	3.24	-1.69	0.0006	0.0053
ATP10A	ATPase phospholipid transporting 10A (putative)	protein-coding	5.13	5.88	-1.69	0.0002	0.0022
TMTC3	transmembrane O-mannosyltransferase targeting cadherins 3	protein-coding	5.63	6.39	-1.69	5.9e-05	0.0009
NEGR1	neuronal growth regulator 1	protein-coding	4.31	5.07	-1.69	3.67e-05	0.0006
MYEF2	myelin expression factor 2	protein-coding	0.84	1.6	-1.69	3.13e-05	0.0005
DBNDD2	dysbindin domain containing 2	protein-coding	4.2	4.96	-1.69	2.92e-05	0.0005
SLC38A1	solute carrier family 38 member 1	protein-coding	4.25	5	-1.69	9.16e-06	0.0002
NBR2	neighbor of BRCA1 lncRNA 2	ncRNA	3.44	4.2	-1.69	7.27e-06	0.0002
LRRC1	leucine rich repeat containing 1	protein-coding	0.86	1.62	-1.69	7.69e-07	3.07e-05
APC	APC regulator of WNT signaling pathway	protein-coding	4.39	5.14	-1.69	1.7e-07	9.63e-06
SREK1	splicing regulatory glutamic acid and lysine rich protein 1	protein-coding	4.78	5.54	-1.69	5.74e-08	4.24e-06
METTL15	methyltransferase like 15	protein-coding	3.31	4.07	-1.69	3.32e-08	2.76e-06
SPATA5	spermatogenesis associated 5	protein-coding	3.1	3.86	-1.69	3.04e-08	2.6e-06
DICER1	dicer 1, ribonuclease III	protein-coding	3.29	4.05	-1.69	1.77e-08	1.78e-06
WNK1	WNK lysine deficient protein kinase 1	protein-coding	2.84	3.6	-1.69	1.3e-08	1.44e-06
DDHD2	DDHD domain containing 2	protein-coding	4.53	5.29	-1.69	2.21e-09	3.83e-07
AP3B1	adaptor related protein complex 3 subunit beta 1	protein-coding	4.95	5.71	-1.69	2.28e-11	1.16e-08
LOC100190986	uncharacterized LOC100190986	ncRNA	4.2	4.95	-1.68	0.0007	0.0065
ZFP36	ZFP36 ring finger protein	protein-coding	6.15	6.9	-1.68	5.45e-05	0.0008
PHTF2	putative homeodomain transcription factor 2	protein-coding	4.25	4.99	-1.68	2.42e-05	0.0004
PIK3R2	phosphoinositide-3-kinase regulatory subunit 2	protein-coding	6.05	6.8	-1.68	2.1e-06	6.58e-05
CEACAM19	CEA cell adhesion molecule 19	protein-coding	3.02	3.78	-1.68	1.94e-06	6.15e-05
STING1	stimulator of interferon response cGAMP interactor 1	protein-coding	4.78	5.53	-1.68	1.1e-06	3.98e-05
TRIP11	thyroid hormone receptor interactor 11	protein-coding	4.37	5.11	-1.68	2.63e-07	1.34e-05
FBXO3	F-box protein 3	protein-coding	4.71	5.47	-1.68	2.25e-09	3.84e-07
RAB40AL	RAB40A like	protein-coding	0.21	0.95	-1.68	4.79e-10	1.16e-07
XPO4	exportin 4	protein-coding	3.1	3.85	-1.68	1.09e-10	3.85e-08
TJP1	tight junction protein 1	protein-coding	4.4	5.15	-1.68	1.06e-10	3.82e-08
SF3B1	splicing factor 3b subunit 1	protein-coding	7.19	7.94	-1.68	3.95e-11	1.61e-08
HELZ	helicase with zinc finger	protein-coding	5.08	5.83	-1.68	2.83e-12	2.18e-09
HECW2	HECT, C2 and WW domain containing E3 ubiquitin protein ligase 2	protein-coding	2.75	3.49	-1.67	0.0008	0.0066
RGS7BP	regulator of G protein signaling 7 binding protein	protein-coding	-0.14	0.6	-1.67	0.0005	0.005
ANXA3	annexin A3	protein-coding	0.69	1.43	-1.67	0.0001	0.0014
SGCB	sarcoglycan beta	protein-coding	7.02	7.76	-1.67	7.13e-05	0.001
CLK4	CDC like kinase 4	protein-coding	1.55	2.29	-1.67	2.26e-05	0.0004
ADGRE5	adhesion G protein-coupled receptor E5	protein-coding	5.25	5.99	-1.67	1.52e-05	0.0003
LEO1	LEO1 homolog, Paf1/RNA polymerase II complex component	protein-coding	4.79	5.53	-1.67	1.5e-05	0.0003
MALAT1	metastasis associated lung adenocarcinoma transcript 1	ncRNA	10.95	11.69	-1.67	1.47e-05	0.0003
ZNRF2P1	zinc and ring finger 2 pseudogene 1	pseudo	1.29	2.03	-1.67	2.73e-06	8.1e-05
FUS	FUS RNA binding protein	protein-coding	5.53	6.27	-1.67	2.72e-06	8.1e-05
CTR9	CTR9 homolog, Paf1/RNA polymerase II complex component	protein-coding	5.3	6.04	-1.67	2.16e-06	6.68e-05
PWAR5	Prader Willi/Angelman region RNA 5	protein-coding	1.45	2.19	-1.67	1.92e-06	6.08e-05
ECHDC2	enoyl-CoA hydratase domain containing 2	protein-coding	3.2	3.93	-1.67	8.48e-07	3.27e-05
PKDCC	protein kinase domain containing, cytoplasmic	protein-coding	3.99	4.72	-1.66	0.0013	0.0096
RHOB	ras homolog family member B	protein-coding	5.68	6.42	-1.66	0.0005	0.005
SMS	spermine synthase	protein-coding	4.66	5.39	-1.66	9.59e-05	0.0013
LYRM9	LYR motif containing 9	protein-coding	2.65	3.38	-1.66	3.91e-06	0.0001
SNX3	sorting nexin 3	protein-coding	7.82	8.55	-1.66	1.97e-06	6.22e-05
PTP4A1	protein tyrosine phosphatase 4A1	protein-coding	5.51	6.24	-1.66	1.81e-06	5.87e-05
RUFY3	RUN and FYVE domain containing 3	protein-coding	3.91	4.65	-1.66	7e-07	2.87e-05
TMEM43	transmembrane protein 43	protein-coding	5.62	6.35	-1.66	5.15e-07	2.26e-05
ZBTB41	zinc finger and BTB domain containing 41	protein-coding	4.26	4.99	-1.66	4.3e-07	1.97e-05
BEND3P3	BEN domain containing 3 pseudogene 3	pseudo	2.28	3.02	-1.66	3.25e-07	1.57e-05
SCAND2P	SCAN domain containing 2 pseudogene	pseudo	1.32	2.05	-1.66	2.49e-07	1.28e-05
ETF1	eukaryotic translation termination factor 1	protein-coding	5.36	6.09	-1.66	2.16e-07	1.15e-05
SRP54	signal recognition particle 54	protein-coding	6.35	7.08	-1.66	2.08e-07	1.13e-05
SMCR8	SMCR8-C9orf72 complex subunit	protein-coding	4.57	5.3	-1.66	1.76e-07	9.87e-06
DENND1A	DENN domain containing 1A	protein-coding	4.97	5.71	-1.66	1.67e-07	9.56e-06
SUGCT-AS1	SUGCT antisense RNA 1	ncRNA	1.71	2.45	-1.66	1.17e-07	7.3e-06
CEP295	centrosomal protein 295	protein-coding	2.4	3.13	-1.66	9.56e-08	6.11e-06
ST7	suppression of tumorigenicity 7	protein-coding	4.24	4.97	-1.66	7.91e-08	5.31e-06
TNKS	tankyrase	protein-coding	4.05	4.77	-1.66	6.23e-08	4.49e-06
ARL5B	ADP ribosylation factor like GTPase 5B	protein-coding	4.76	5.5	-1.66	2.64e-09	4.26e-07
EBLN3P	endogenous Bornavirus like nucleoprotein 3, pseudogene	pseudo	4.35	5.08	-1.66	4.53e-10	1.14e-07
IDS	iduronate 2-sulfatase	protein-coding	6.61	7.35	-1.66	2.86e-10	7.94e-08
EXPH5	exophilin 5	protein-coding	0.41	1.14	-1.65	0.0005	0.0049
DIAPH3	diaphanous related formin 3	protein-coding	2.57	3.29	-1.65	0.0004	0.0043
AVPI1	arginine vasopressin induced 1	protein-coding	5.08	5.8	-1.65	0.0003	0.003
OCLNP1	OCLN pseudogene 1	pseudo	0.66	1.39	-1.65	0.0002	0.0022
LINC02893	long intergenic non-protein coding RNA 2893	ncRNA	1.9	2.62	-1.65	9.26e-05	0.0012
CAPZA2	capping actin protein of muscle Z-line subunit alpha 2	protein-coding	6.46	7.19	-1.65	6.41e-05	0.0009
ANKRD36B	ankyrin repeat domain 36B	protein-coding	2.42	3.14	-1.65	5.88e-05	0.0009
ANKRD36	ankyrin repeat domain 36	protein-coding	3.54	4.26	-1.65	4.53e-05	0.0007
YBX1	Y-box binding protein 1	protein-coding	8.61	9.33	-1.65	3.23e-05	0.0005
TBC1D2	TBC1 domain family member 2	protein-coding	3.29	4.02	-1.65	2.83e-05	0.0005
PIK3C2B	phosphatidylinositol-4-phosphate 3-kinase catalytic subunit type 2 beta	protein-coding	1.24	1.97	-1.65	1.53e-05	0.0003
ARHGAP27P1	Rho GTPase activating protein 27 pseudogene 1	pseudo	3.74	4.46	-1.65	2.65e-06	7.99e-05
UFL1	UFM1 specific ligase 1	protein-coding	4.52	5.25	-1.65	1.68e-06	5.51e-05
TBC1D12	TBC1 domain family member 12	protein-coding	4.26	4.99	-1.65	8.33e-07	3.23e-05
SNORA58	small nucleolar RNA, H/ACA box 58	snoRNA	1.39	2.11	-1.65	6.24e-07	2.62e-05
KLRA1P	killer cell lectin like receptor A1, pseudogene	pseudo	1.25	1.97	-1.65	3.18e-07	1.54e-05
TAS2R13	taste 2 receptor member 13	protein-coding	0.43	1.16	-1.65	2.96e-07	1.45e-05
IGIP	IgA inducing protein	protein-coding	4.09	4.81	-1.65	2.96e-07	1.45e-05
REEP3	receptor accessory protein 3	protein-coding	4.62	5.34	-1.65	1.73e-07	9.73e-06
RAD17	RAD17 checkpoint clamp loader component	protein-coding	3.7	4.42	-1.65	1.67e-07	9.56e-06
UBN2	ubinuclein 2	protein-coding	3.21	3.93	-1.65	1.33e-07	7.97e-06
SEPTIN11	septin 11	protein-coding	9.04	9.76	-1.65	7.73e-08	5.24e-06
SIPA1L1	signal induced proliferation associated 1 like 1	protein-coding	5.1	5.82	-1.65	7.04e-08	4.93e-06
HSPG2	heparan sulfate proteoglycan 2	protein-coding	7.78	8.5	-1.65	3.52e-08	2.88e-06
TAS2R50	taste 2 receptor member 50	protein-coding	0.37	1.09	-1.65	1.69e-08	1.75e-06
WDR47	WD repeat domain 47	protein-coding	3.92	4.64	-1.65	1.61e-08	1.69e-06
ZNF529	zinc finger protein 529	protein-coding	2.78	3.5	-1.65	1.43e-08	1.53e-06
EBLN2	endogenous Bornavirus like nucleoprotein 2	protein-coding	0.9	1.62	-1.65	2.31e-09	3.85e-07
SLC6A6	solute carrier family 6 member 6	protein-coding	5.91	6.62	-1.64	0.0007	0.0061
RHPN2	rhophilin Rho GTPase binding protein 2	protein-coding	2.09	2.8	-1.64	7.73e-05	0.0011
ITGB5	integrin subunit beta 5	protein-coding	6.87	7.59	-1.64	6.43e-05	0.0009
BMP4	bone morphogenetic protein 4	protein-coding	0.04	0.76	-1.64	5.63e-05	0.0008
SEC11A	SEC11 homolog A, signal peptidase complex subunit	protein-coding	6.29	7	-1.64	2.77e-05	0.0005
MAF	MAF bZIP transcription factor	protein-coding	0.51	1.22	-1.64	1.34e-05	0.0003
EPS8L2	EPS8 like 2	protein-coding	3.27	3.99	-1.64	9.93e-06	0.0002
SUMO4	small ubiquitin like modifier 4	protein-coding	0.95	1.66	-1.64	8.26e-06	0.0002
AP1G2	adaptor related protein complex 1 subunit gamma 2	protein-coding	2.66	3.37	-1.64	6.6e-06	0.0002
CLIP3	CAP-Gly domain containing linker protein 3	protein-coding	6.98	7.69	-1.64	2.72e-06	8.1e-05
ZNF638	zinc finger protein 638	protein-coding	5.01	5.72	-1.64	1.26e-06	4.39e-05
LTN1	listerin E3 ubiquitin protein ligase 1	protein-coding	4.19	4.91	-1.64	9.36e-07	3.54e-05
MAN2A1	mannosidase alpha class 2A member 1	protein-coding	6.38	7.09	-1.64	4.38e-08	3.44e-06
TMPPE	transmembrane protein with metallophosphoesterase domain	protein-coding	1.78	2.49	-1.64	1.94e-09	3.43e-07
ZNF160	zinc finger protein 160	protein-coding	4.22	4.93	-1.64	1.92e-10	6.06e-08
ATP13A3	ATPase 13A3	protein-coding	6.98	7.69	-1.63	3.99e-05	0.0007
MYH10	myosin heavy chain 10	protein-coding	6.54	7.24	-1.63	3.06e-05	0.0005
UBR7	ubiquitin protein ligase E3 component n-recognin 7	protein-coding	3.76	4.46	-1.63	1.5e-05	0.0003
PLS3	plastin 3	protein-coding	7.92	8.62	-1.63	1.07e-05	0.0002
SPART	spartin	protein-coding	5.24	5.94	-1.63	7.65e-06	0.0002
PTPRF	protein tyrosine phosphatase receptor type F	protein-coding	5.15	5.86	-1.63	3.83e-06	0.0001
VPS13C	vacuolar protein sorting 13 homolog C	protein-coding	5.23	5.93	-1.63	1.64e-06	5.44e-05
FBXO38	F-box protein 38	protein-coding	3.97	4.68	-1.63	1.38e-06	4.73e-05
HNRNPA2B1	heterogeneous nuclear ribonucleoprotein A2/B1	protein-coding	7.86	8.56	-1.63	1.1e-06	3.98e-05
TTC21B	tetratricopeptide repeat domain 21B	protein-coding	3.47	4.17	-1.63	5.11e-07	2.25e-05
CERT1	ceramide transporter 1	protein-coding	4.53	5.23	-1.63	5.05e-07	2.23e-05
FAR1	fatty acyl-CoA reductase 1	protein-coding	4.78	5.49	-1.63	1.14e-07	7.09e-06
POLK	DNA polymerase kappa	protein-coding	3.51	4.22	-1.63	1.14e-07	7.09e-06
LINC00174	long intergenic non-protein coding RNA 174	ncRNA	1.24	1.94	-1.63	9.09e-09	1.12e-06
SMAD1	SMAD family member 1	protein-coding	4.11	4.81	-1.63	6.82e-09	8.87e-07
ANKRD33B	ankyrin repeat domain 33B	protein-coding	2.58	3.27	-1.62	0.0007	0.0062
PAPSS2	3'-phosphoadenosine 5'-phosphosulfate synthase 2	protein-coding	3.06	3.76	-1.62	0.0004	0.0042
RPL23AP32	ribosomal protein L23a pseudogene 32	pseudo	1.59	2.29	-1.62	0.0002	0.0024
LINC01963	long intergenic non-protein coding RNA 1963	ncRNA	3.43	4.12	-1.62	6.9e-05	0.001
SASS6	SAS-6 centriolar assembly protein	protein-coding	1.61	2.3	-1.62	6.19e-05	0.0009
RTL1	retrotransposon Gag like 1	protein-coding	1.38	2.08	-1.62	5.26e-05	0.0008
MGC16025	uncharacterized LOC85009	ncRNA	0.9	1.59	-1.62	9.79e-06	0.0002
UBE2H	ubiquitin conjugating enzyme E2 H	protein-coding	6.65	7.34	-1.62	6.97e-06	0.0002
RPL29P2	ribosomal protein L29 pseudogene 2	pseudo	2.99	3.68	-1.62	4.52e-06	0.0001
EXOC6	exocyst complex component 6	protein-coding	0.98	1.68	-1.62	1.27e-06	4.41e-05
SEC24A	SEC24 homolog A, COPII coat complex component	protein-coding	4.7	5.4	-1.62	9.65e-07	3.62e-05
USP45	ubiquitin specific peptidase 45	protein-coding	2.46	3.16	-1.62	2.91e-07	1.44e-05
ZFP37	ZFP37 zinc finger protein	protein-coding	1.55	2.25	-1.62	1.81e-07	1.01e-05
JMY	junction mediating and regulatory protein, p53 cofactor	protein-coding	3.6	4.3	-1.62	1.4e-07	8.28e-06
SMIM14	small integral membrane protein 14	protein-coding	5.55	6.25	-1.62	4.11e-09	6.15e-07
CDK13	cyclin dependent kinase 13	protein-coding	5.66	6.35	-1.62	7.19e-10	1.61e-07
WIPF1	WAS/WASL interacting protein family member 1	protein-coding	6.42	7.1	-1.61	0.0002	0.0023
MAGI2	membrane associated guanylate kinase, WW and PDZ domain containing 2	protein-coding	2.16	2.85	-1.61	9.42e-05	0.0013
GRK5	G protein-coupled receptor kinase 5	protein-coding	4.86	5.55	-1.61	3.34e-05	0.0006
POU2F1	POU class 2 homeobox 1	protein-coding	2.46	3.14	-1.61	2.86e-05	0.0005
TNFRSF25	TNF receptor superfamily member 25	protein-coding	1.32	2.01	-1.61	2.72e-05	0.0005
KCNQ1OT1	KCNQ1 opposite strand/antisense transcript 1	ncRNA	4.22	4.91	-1.61	6.58e-06	0.0002
LRRC37A3	leucine rich repeat containing 37 member A3	protein-coding	1.44	2.13	-1.61	4.67e-06	0.0001
DAAM1	dishevelled associated activator of morphogenesis 1	protein-coding	5.81	6.5	-1.61	3.48e-06	9.84e-05
ZNF480	zinc finger protein 480	protein-coding	2.71	3.4	-1.61	7.57e-07	3.04e-05
SH3RF1	SH3 domain containing ring finger 1	protein-coding	4.33	5.02	-1.61	5.23e-07	2.29e-05
PDCD4	programmed cell death 4	protein-coding	6.37	7.05	-1.61	9.57e-08	6.11e-06
DYRK3	dual specificity tyrosine phosphorylation regulated kinase 3	protein-coding	4.02	4.71	-1.61	8.24e-08	5.44e-06
ELF1	E74 like ETS transcription factor 1	protein-coding	5.02	5.71	-1.61	6.05e-08	4.37e-06
TAOK1	TAO kinase 1	protein-coding	6.66	7.35	-1.61	5.52e-08	4.13e-06
ZC3H7A	zinc finger CCCH-type containing 7A	protein-coding	4.49	5.18	-1.61	9.34e-09	1.12e-06
L2HGDH	L-2-hydroxyglutarate dehydrogenase	protein-coding	1.43	2.11	-1.61	9.97e-10	2.18e-07
TNNC2	troponin C2, fast skeletal type	protein-coding	1.14	1.83	-1.6	0.0003	0.0028
DCLK2	doublecortin like kinase 2	protein-coding	2.61	3.29	-1.6	0.0002	0.002
MXRA8	matrix remodeling associated 8	protein-coding	6.78	7.47	-1.6	0.0002	0.002
BTBD8	BTB domain containing 8	protein-coding	3.14	3.82	-1.6	0.0001	0.0014
WNT2B	Wnt family member 2B	protein-coding	0.96	1.63	-1.6	3.4e-05	0.0006
CCDC148	coiled-coil domain containing 148	protein-coding	0.43	1.11	-1.6	2.78e-05	0.0005
ARL17A	ADP ribosylation factor like GTPase 17A	protein-coding	4.29	4.97	-1.6	1.67e-05	0.0003
ARPC3	actin related protein 2/3 complex subunit 3	protein-coding	7.24	7.91	-1.6	1.6e-05	0.0003
UAP1	UDP-N-acetylglucosamine pyrophosphorylase 1	protein-coding	6.88	7.55	-1.6	6.17e-06	0.0002
CARMIL1	capping protein regulator and myosin 1 linker 1	protein-coding	2.39	3.07	-1.6	4.06e-06	0.0001
LNPK	lunapark, ER junction formation factor	protein-coding	4.88	5.56	-1.6	3.26e-06	9.35e-05
UBE2B	ubiquitin conjugating enzyme E2 B	protein-coding	5.9	6.58	-1.6	1.51e-06	5.06e-05
MED13L	mediator complex subunit 13L	protein-coding	6.58	7.26	-1.6	1.16e-06	4.11e-05
GCNT4	glucosaminyl (N-acetyl) transferase 4	protein-coding	0.32	0.99	-1.6	1.07e-06	3.93e-05
TMEM131L	transmembrane 131 like	protein-coding	3.93	4.61	-1.6	6.39e-07	2.67e-05
VDAC3	voltage dependent anion channel 3	protein-coding	5.78	6.46	-1.6	4.34e-07	1.98e-05
INTS3	integrator complex subunit 3	protein-coding	5.19	5.87	-1.6	3.35e-07	1.6e-05
CENATAC	centrosomal AT-AC splicing factor	protein-coding	3.21	3.89	-1.6	3.3e-07	1.59e-05
SCRN3	secernin 3	protein-coding	2.79	3.47	-1.6	2.15e-07	1.15e-05
PPIP5K2	diphosphoinositol pentakisphosphate kinase 2	protein-coding	3.39	4.07	-1.6	8.48e-08	5.53e-06
TAS2R46	taste 2 receptor member 46	protein-coding	0.17	0.85	-1.6	2.09e-08	1.99e-06
TBC1D3	TBC1 domain family member 3	protein-coding	3.01	3.69	-1.6	6.04e-09	8.44e-07
HSD17B12	hydroxysteroid 17-beta dehydrogenase 12	protein-coding	5.73	6.41	-1.6	1.18e-09	2.41e-07
RAPH1	Ras association (RalGDS/AF-6) and pleckstrin homology domains 1	protein-coding	5.54	6.21	-1.59	0.0007	0.0063
CYBRD1	cytochrome b reductase 1	protein-coding	8.9	9.56	-1.59	9.2e-05	0.0012
C1QTNF3	C1q and TNF related 3	protein-coding	1.56	2.24	-1.59	7.08e-05	0.001
PNPLA7	patatin like phospholipase domain containing 7	protein-coding	1.09	1.76	-1.59	3.42e-05	0.0006
ZMPSTE24	zinc metallopeptidase STE24	protein-coding	4.35	5.02	-1.59	3.29e-06	9.39e-05
PIK3CA	phosphatidylinositol-4,5-bisphosphate 3-kinase catalytic subunit alpha	protein-coding	4.47	5.14	-1.59	2.67e-06	8e-05
CHPF2	chondroitin polymerizing factor 2	protein-coding	5.47	6.14	-1.59	1.67e-06	5.5e-05
SNX30	sorting nexin family member 30	protein-coding	5.23	5.91	-1.59	1.08e-06	3.95e-05
CEP43	centrosomal protein 43	protein-coding	3.05	3.72	-1.59	8.77e-07	3.36e-05
C1GALT1	core 1 synthase, glycoprotein-N-acetylgalactosamine 3-beta-galactosyltransferase 1	protein-coding	5.4	6.07	-1.59	6.93e-07	2.85e-05
STK17A	serine/threonine kinase 17a	protein-coding	5.07	5.74	-1.59	7.96e-08	5.33e-06
LAT	linker for activation of T cells	protein-coding	0.84	1.51	-1.59	5.99e-08	4.34e-06
VPS41	VPS41 subunit of HOPS complex	protein-coding	5.14	5.81	-1.59	3.88e-08	3.1e-06
SRRM1	serine and arginine repetitive matrix 1	protein-coding	6.85	7.52	-1.59	2.83e-08	2.49e-06
REL	REL proto-oncogene, NF-kB subunit	protein-coding	2.99	3.66	-1.59	1.18e-08	1.33e-06
ARRDC3	arrestin domain containing 3	protein-coding	4.98	5.64	-1.58	0.0006	0.0057
LINC01018	long intergenic non-protein coding RNA 1018	ncRNA	0.14	0.8	-1.58	0.0005	0.0047
KIAA1549L	KIAA1549 like	protein-coding	3.82	4.48	-1.58	9.6e-05	0.0013
DOCK9	dedicator of cytokinesis 9	protein-coding	2.96	3.62	-1.58	7.26e-05	0.001
DMTF1	cyclin D binding myb like transcription factor 1	protein-coding	4.27	4.93	-1.58	1.59e-05	0.0003
TM9SF2	transmembrane 9 superfamily member 2	protein-coding	6.94	7.6	-1.58	8.92e-06	0.0002
DNAH1	dynein axonemal heavy chain 1	protein-coding	1.37	2.03	-1.58	1.64e-06	5.44e-05
ATP11C	ATPase phospholipid transporting 11C	protein-coding	5.32	5.98	-1.58	7.81e-07	3.09e-05
SUMO1P3	SUMO1 pseudogene 3	pseudo	6.4	7.06	-1.58	1.23e-07	7.57e-06
XGY2	XG pseudogene, Y-linked 2	pseudo	0.03	0.68	-1.58	1.22e-07	7.56e-06
FUBP1	far upstream element binding protein 1	protein-coding	5.41	6.07	-1.58	9.32e-08	6.02e-06
ZMYND8	zinc finger MYND-type containing 8	protein-coding	3.04	3.7	-1.58	8.53e-08	5.55e-06
TEP1	telomerase associated protein 1	protein-coding	2.79	3.44	-1.58	2.03e-08	1.95e-06
RUFY2	RUN and FYVE domain containing 2	protein-coding	4.24	4.9	-1.58	1.24e-08	1.39e-06
ERLEC1	endoplasmic reticulum lectin 1	protein-coding	6.2	6.87	-1.58	8.22e-09	1.04e-06
SLC2A3	solute carrier family 2 member 3	protein-coding	7.19	7.86	-1.58	6.65e-09	8.82e-07
TAF1D	TATA-box binding protein associated factor, RNA polymerase I subunit D	protein-coding	7.07	7.73	-1.58	1.96e-10	6.06e-08
POU5F2	POU domain class 5, transcription factor 2	protein-coding	0.06	0.72	-1.58	3.8e-12	2.82e-09
LIMS4	LIM zinc finger domain containing 4	protein-coding	1.7	2.35	-1.57	0.0011	0.0088
SERAC1	serine active site containing 1	protein-coding	3.84	4.49	-1.57	0.0009	0.0074
MYOM1	myomesin 1	protein-coding	1.05	1.7	-1.57	0.0004	0.004
PER3	period circadian regulator 3	protein-coding	3.97	4.62	-1.57	0.0003	0.0032
AXIN2	axin 2	protein-coding	2.08	2.73	-1.57	0.0003	0.003
RPS6KA6	ribosomal protein S6 kinase A6	protein-coding	1.74	2.39	-1.57	0.0002	0.0027
CRIM1	cysteine rich transmembrane BMP regulator 1	protein-coding	9.75	10.4	-1.57	0.0002	0.0024
PAQR3	progestin and adipoQ receptor family member 3	protein-coding	2.69	3.34	-1.57	9.46e-05	0.0013
EEA1	early endosome antigen 1	protein-coding	3.7	4.35	-1.57	7.91e-05	0.0011
SLC23A2	solute carrier family 23 member 2	protein-coding	3.51	4.16	-1.57	4.24e-05	0.0007
PGRMC2	progesterone receptor membrane component 2	protein-coding	6.56	7.21	-1.57	2.9e-05	0.0005
AGA	aspartylglucosaminidase	protein-coding	4.58	5.23	-1.57	1.7e-05	0.0003
SESN1	sestrin 1	protein-coding	3.5	4.15	-1.57	1.12e-05	0.0002
STK39	serine/threonine kinase 39	protein-coding	4.91	5.56	-1.57	5.62e-06	0.0001
C22orf46	CTA-216E10.6	pseudo	1.78	2.43	-1.57	4.02e-06	0.0001
AMT	aminomethyltransferase	protein-coding	1.57	2.21	-1.57	3.23e-06	9.33e-05
LTBP3	latent transforming growth factor beta binding protein 3	protein-coding	7.63	8.28	-1.57	2.53e-06	7.66e-05
FAM3C	FAM3 metabolism regulating signaling molecule C	protein-coding	5.51	6.16	-1.57	1.69e-06	5.55e-05
CENPT	centromere protein T	protein-coding	1	1.64	-1.57	1.57e-06	5.24e-05
ATP5IF1	ATP synthase inhibitory factor subunit 1	protein-coding	5.65	6.3	-1.57	6.36e-07	2.66e-05
LPAR6	lysophosphatidic acid receptor 6	protein-coding	0.82	1.48	-1.57	5.99e-07	2.54e-05
TYW3	tRNA-yW synthesizing protein 3 homolog	protein-coding	3.66	4.31	-1.57	4.85e-07	2.16e-05
MID2	midline 2	protein-coding	3.65	4.29	-1.57	4.48e-07	2.03e-05
GNB4	G protein subunit beta 4	protein-coding	4.07	4.72	-1.57	2.94e-07	1.45e-05
LRBA	LPS responsive beige-like anchor protein	protein-coding	4.49	5.14	-1.57	2.27e-07	1.19e-05
CCNT1	cyclin T1	protein-coding	4.36	5.01	-1.57	1.51e-07	8.77e-06
OSBPL9	oxysterol binding protein like 9	protein-coding	5.48	6.13	-1.57	1.41e-07	8.28e-06
KPNA5	karyopherin subunit alpha 5	protein-coding	3.13	3.78	-1.57	7.31e-08	5.07e-06
PRPF39	pre-mRNA processing factor 39	protein-coding	4.1	4.75	-1.57	7.1e-08	4.96e-06
RBM25	RNA binding motif protein 25	protein-coding	5.66	6.31	-1.57	5.86e-08	4.29e-06
PLA2G12A	phospholipase A2 group XIIA	protein-coding	4	4.65	-1.57	3.33e-08	2.76e-06
MACF1	microtubule actin crosslinking factor 1	protein-coding	6.23	6.89	-1.57	2.94e-08	2.54e-06
CNOT6	CCR4-NOT transcription complex subunit 6	protein-coding	4.38	5.02	-1.57	1.98e-08	1.92e-06
ZFHX3	zinc finger homeobox 3	protein-coding	5.18	5.83	-1.57	9.35e-09	1.12e-06
PRMT9	protein arginine methyltransferase 9	protein-coding	1.74	2.4	-1.57	2.65e-10	7.62e-08
TNFSF18	TNF superfamily member 18	protein-coding	-0.04	0.6	-1.56	0.0008	0.0071
IFNE	interferon epsilon	protein-coding	1.62	2.26	-1.56	0.0005	0.0051
MXRA7	matrix remodeling associated 7	protein-coding	4.85	5.5	-1.56	4.22e-05	0.0007
NCL	nucleolin	protein-coding	7.29	7.92	-1.56	3.79e-05	0.0006
HCFC2	host cell factor C2	protein-coding	4.56	5.2	-1.56	2.85e-05	0.0005
CFAP44	cilia and flagella associated protein 44	protein-coding	0.96	1.6	-1.56	1.75e-05	0.0003
VPS8	VPS8 subunit of CORVET complex	protein-coding	4.77	5.42	-1.56	9.92e-06	0.0002
JADE1	jade family PHD finger 1	protein-coding	5.05	5.69	-1.56	8.43e-06	0.0002
AGL	amylo-alpha-1, 6-glucosidase, 4-alpha-glucanotransferase	protein-coding	3.87	4.51	-1.56	6.6e-06	0.0002
ADAM10	ADAM metallopeptidase domain 10	protein-coding	6.19	6.83	-1.56	5.46e-06	0.0001
NEDD1	NEDD1 gamma-tubulin ring complex targeting factor	protein-coding	3.51	4.15	-1.56	4.89e-06	0.0001
SYNE1	spectrin repeat containing nuclear envelope protein 1	protein-coding	5.78	6.42	-1.56	4.62e-06	0.0001
API5	apoptosis inhibitor 5	protein-coding	6.39	7.03	-1.56	1.74e-06	5.69e-05
NPAT	nuclear protein, coactivator of histone transcription	protein-coding	3.86	4.51	-1.56	9.36e-07	3.54e-05
EML4	EMAP like 4	protein-coding	4.55	5.19	-1.56	4.35e-07	1.99e-05
MCU	mitochondrial calcium uniporter	protein-coding	2.96	3.6	-1.56	2.34e-07	1.22e-05
AASS	aminoadipate-semialdehyde synthase	protein-coding	1.28	1.92	-1.56	1.66e-07	9.56e-06
LENG9	leukocyte receptor cluster member 9	protein-coding	3.3	3.95	-1.56	7.37e-08	5.09e-06
SLC30A9	solute carrier family 30 member 9	protein-coding	5.54	6.18	-1.56	5.62e-08	4.18e-06
RGPD6	RANBP2 like and GRIP domain containing 6	protein-coding	3.54	4.18	-1.56	3.28e-08	2.74e-06
SLC12A2	solute carrier family 12 member 2	protein-coding	3.51	4.15	-1.56	1.87e-08	1.85e-06
PHC3	polyhomeotic homolog 3	protein-coding	5.34	5.98	-1.56	6.11e-09	8.47e-07
ZNF431	zinc finger protein 431	protein-coding	3.12	3.77	-1.56	1.76e-09	3.25e-07
BAIAP2L1	BAR/IMD domain containing adaptor protein 2 like 1	protein-coding	3.26	3.89	-1.55	0.001	0.0083
MEIS2	Meis homeobox 2	protein-coding	6.27	6.91	-1.55	0.0009	0.0078
ERV3-1	endogenous retrovirus group 3 member 1, envelope	protein-coding	3.19	3.82	-1.55	0.0008	0.0071
SLC29A1	solute carrier family 29 member 1 (Augustine blood group)	protein-coding	3.17	3.8	-1.55	0.0004	0.0043
LOX	lysyl oxidase	protein-coding	10.1	10.74	-1.55	0.0002	0.0025
RPL6	ribosomal protein L6	protein-coding	9.19	9.82	-1.55	0.0002	0.002
TP53INP1	tumor protein p53 inducible nuclear protein 1	protein-coding	2.74	3.38	-1.55	0.0001	0.0014
DDAH1	dimethylarginine dimethylaminohydrolase 1	protein-coding	7.43	8.06	-1.55	7.55e-05	0.0011
DONSON	DNA replication fork stabilization factor DONSON	protein-coding	2.15	2.79	-1.55	2.65e-05	0.0005
ZNF195	zinc finger protein 195	protein-coding	1.95	2.59	-1.55	2.36e-05	0.0004
NPIPB5	nuclear pore complex interacting protein family member B5	protein-coding	4.57	5.2	-1.55	2.29e-05	0.0004
SMIM8	small integral membrane protein 8	protein-coding	2.83	3.46	-1.55	8.09e-06	0.0002
TMEM87B	transmembrane protein 87B	protein-coding	4.79	5.42	-1.55	5.58e-06	0.0001
KCTD9	potassium channel tetramerization domain containing 9	protein-coding	5.15	5.78	-1.55	2.63e-06	7.93e-05
SLC12A6	solute carrier family 12 member 6	protein-coding	3.61	4.24	-1.55	1.77e-06	5.76e-05
GLTP	glycolipid transfer protein	protein-coding	4.02	4.66	-1.55	1.64e-06	5.44e-05
TRAPPC3	trafficking protein particle complex subunit 3	protein-coding	5.55	6.18	-1.55	1.17e-06	4.15e-05
ARPC1A	actin related protein 2/3 complex subunit 1A	protein-coding	5.8	6.43	-1.55	7.25e-07	2.94e-05
RASA1	RAS p21 protein activator 1	protein-coding	5.77	6.4	-1.55	5.42e-07	2.34e-05
CACNA2D1	calcium voltage-gated channel auxiliary subunit alpha2delta 1	protein-coding	5	5.63	-1.55	5.01e-07	2.22e-05
KLHL11	kelch like family member 11	protein-coding	3.73	4.36	-1.55	4.85e-07	2.16e-05
TBCK	TBC1 domain containing kinase	protein-coding	5.38	6.02	-1.55	3.03e-07	1.47e-05
TOMM7	translocase of outer mitochondrial membrane 7	protein-coding	7.92	8.55	-1.55	1.29e-07	7.81e-06
NIT2	nitrilase family member 2	protein-coding	3.99	4.63	-1.55	3.96e-08	3.16e-06
RBM39	RNA binding motif protein 39	protein-coding	7.61	8.24	-1.55	2.28e-09	3.85e-07
NCOA3	nuclear receptor coactivator 3	protein-coding	5.7	6.33	-1.55	5.1e-10	1.19e-07
HNRNPA1P33	heterogeneous nuclear ribonucleoprotein A1 pseudogene 33	pseudo	0.46	1.09	-1.54	0.0013	0.0097
GFPT2	glutamine-fructose-6-phosphate transaminase 2	protein-coding	5.02	5.65	-1.54	0.0008	0.0071
PMP22	peripheral myelin protein 22	protein-coding	6.28	6.91	-1.54	4.85e-05	0.0008
EPB41L2	erythrocyte membrane protein band 4.1 like 2	protein-coding	5.69	6.31	-1.54	3.65e-05	0.0006
HECTD2	HECT domain E3 ubiquitin protein ligase 2	protein-coding	2.87	3.49	-1.54	2.99e-05	0.0005
INTS6L	integrator complex subunit 6 like	protein-coding	1.62	2.25	-1.54	2.68e-05	0.0005
ARL17B	ADP ribosylation factor like GTPase 17B	protein-coding	0.84	1.46	-1.54	2.27e-05	0.0004
LY6G5B	lymphocyte antigen 6 family member G5B	protein-coding	3.35	3.98	-1.54	2.18e-05	0.0004
EVC	EvC ciliary complex subunit 1	protein-coding	5.45	6.07	-1.54	1.46e-05	0.0003
METTL14	methyltransferase 14, N6-adenosine-methyltransferase subunit	protein-coding	2.68	3.31	-1.54	1.41e-05	0.0003
ADHFE1	alcohol dehydrogenase iron containing 1	protein-coding	1.3	1.92	-1.54	1.4e-05	0.0003
PSD3	pleckstrin and Sec7 domain containing 3	protein-coding	4.55	5.17	-1.54	6.28e-06	0.0002
BTBD19	BTB domain containing 19	protein-coding	3.5	4.12	-1.54	5.95e-06	0.0001
SNORA55	small nucleolar RNA, H/ACA box 55	snoRNA	2.84	3.46	-1.54	2.03e-06	6.37e-05
KIAA1109	KIAA1109	protein-coding	5.36	5.99	-1.54	1.09e-06	3.96e-05
MSANTD2	Myb/SANT DNA binding domain containing 2	protein-coding	2.52	3.15	-1.54	5.65e-07	2.43e-05
ADD3	adducin 3	protein-coding	0.53	1.15	-1.54	4.69e-07	2.11e-05
CEP170	centrosomal protein 170	protein-coding	5.36	5.98	-1.54	2.51e-07	1.29e-05
ZNF121	zinc finger protein 121	protein-coding	4.1	4.72	-1.54	1.47e-07	8.59e-06
MPC1	mitochondrial pyruvate carrier 1	protein-coding	5.43	6.05	-1.54	4.82e-08	3.7e-06
ZUP1	zinc finger containing ubiquitin peptidase 1	protein-coding	3.38	4	-1.54	9.99e-09	1.16e-06
PBRM1	polybromo 1	protein-coding	5.52	6.14	-1.54	4.76e-10	1.16e-07
SLC30A7	solute carrier family 30 member 7	protein-coding	4.94	5.56	-1.54	3.43e-11	1.46e-08
SMG1P1	SMG1 pseudogene 1	pseudo	6.58	7.19	-1.53	0.0012	0.0092
SLC46A3	solute carrier family 46 member 3	protein-coding	2.55	3.16	-1.53	0.0004	0.0043
SLC25A4	solute carrier family 25 member 4	protein-coding	4.84	5.45	-1.53	0.0004	0.004
HLTF	helicase like transcription factor	protein-coding	4.18	4.8	-1.53	0.0001	0.0014
PLEC	plectin	protein-coding	6.25	6.87	-1.53	8e-05	0.0011
LRIF1	ligand dependent nuclear receptor interacting factor 1	protein-coding	3.32	3.93	-1.53	3.84e-05	0.0006
TMEM106B	transmembrane protein 106B	protein-coding	4.7	5.31	-1.53	2.9e-05	0.0005
KDM7A	lysine demethylase 7A	protein-coding	4.31	4.92	-1.53	2.81e-05	0.0005
ANKRD20A9P	ankyrin repeat domain 20 family member A9, pseudogene	pseudo	2.75	3.37	-1.53	2.57e-05	0.0005
PTPRA	protein tyrosine phosphatase receptor type A	protein-coding	5.58	6.19	-1.53	1.73e-05	0.0003
AURKAP1	aurora kinase A pseudogene 1	pseudo	1.61	2.23	-1.53	1.56e-05	0.0003
ROCK1P1	Rho associated coiled-coil containing protein kinase 1 pseudogene 1	pseudo	0.52	1.13	-1.53	1.05e-05	0.0002
METTL21A	methyltransferase 21A, HSPA lysine	protein-coding	3.04	3.65	-1.53	6.04e-06	0.0002
ZNF131	zinc finger protein 131	protein-coding	3.8	4.42	-1.53	6.03e-06	0.0002
RIOK3	RIO kinase 3	protein-coding	4.22	4.84	-1.53	4.99e-06	0.0001
ZNF91	zinc finger protein 91	protein-coding	5.17	5.79	-1.53	3.86e-06	0.0001
CDC5L	cell division cycle 5 like	protein-coding	5.28	5.9	-1.53	2.68e-06	8.04e-05
HTT	huntingtin	protein-coding	3.92	4.54	-1.53	1.58e-06	5.27e-05
SLTM	SAFB like transcription modulator	protein-coding	5.29	5.91	-1.53	1.45e-06	4.9e-05
YTHDC2	YTH domain containing 2	protein-coding	2.31	2.92	-1.53	9.95e-07	3.7e-05
UPF2	UPF2 regulator of nonsense mediated mRNA decay	protein-coding	4.19	4.8	-1.53	9.14e-07	3.48e-05
SZT2	SZT2 subunit of KICSTOR complex	protein-coding	4.36	4.98	-1.53	8.41e-07	3.25e-05
PAXBP1	PAX3 and PAX7 binding protein 1	protein-coding	2.29	2.9	-1.53	6.23e-07	2.62e-05
SLC37A3	solute carrier family 37 member 3	protein-coding	4.78	5.4	-1.53	5.86e-07	2.49e-05
FAM126B	family with sequence similarity 126 member B	protein-coding	3.34	3.95	-1.53	2.89e-07	1.43e-05
CAND1	cullin associated and neddylation dissociated 1	protein-coding	4.8	5.42	-1.53	1.99e-07	1.09e-05
SLC35D1	solute carrier family 35 member D1	protein-coding	4.1	4.72	-1.53	1.13e-07	7.06e-06
FAM200A	family with sequence similarity 200 member A	protein-coding	1.97	2.59	-1.53	2.3e-08	2.14e-06
ERC1	ELKS/RAB6-interacting/CAST family member 1	protein-coding	4.7	5.32	-1.53	1.94e-08	1.9e-06
RAB3GAP1	RAB3 GTPase activating protein catalytic subunit 1	protein-coding	5.78	6.39	-1.53	9.67e-09	1.13e-06
MOSPD2	motile sperm domain containing 2	protein-coding	4.98	5.59	-1.52	0.001	0.0079
TLE1	TLE family member 1, transcriptional corepressor	protein-coding	2.44	3.05	-1.52	0.0008	0.0069
UNC13A	unc-13 homolog A	protein-coding	0.01	0.61	-1.52	0.0008	0.0067
MANSC1	MANSC domain containing 1	protein-coding	2.43	3.03	-1.52	0.0007	0.0062
RASSF9	Ras association domain family member 9	protein-coding	1.49	2.09	-1.52	0.0006	0.0051
KCNK6	potassium two pore domain channel subfamily K member 6	protein-coding	1.21	1.82	-1.52	0.0004	0.0036
CERCAM	cerebral endothelial cell adhesion molecule	protein-coding	6.41	7.01	-1.52	0.0003	0.003
AK4	adenylate kinase 4	protein-coding	6.06	6.66	-1.52	0.0003	0.0028
MACROD2	mono-ADP ribosylhydrolase 2	protein-coding	1.16	1.77	-1.52	0.0002	0.002
SNX9	sorting nexin 9	protein-coding	3.71	4.31	-1.52	8.48e-05	0.0012
MINDY2	MINDY lysine 48 deubiquitinase 2	protein-coding	4	4.6	-1.52	4.83e-05	0.0008
ANKRD42	ankyrin repeat domain 42	protein-coding	3.76	4.37	-1.52	3.93e-05	0.0006
MLH3	mutL homolog 3	protein-coding	3.05	3.66	-1.52	2.12e-05	0.0004
NAP1L1	nucleosome assembly protein 1 like 1	protein-coding	7.54	8.14	-1.52	2.08e-05	0.0004
SUCLA2	succinate-CoA ligase ADP-forming subunit beta	protein-coding	4.49	5.1	-1.52	1.47e-05	0.0003
CRY2	cryptochrome circadian regulator 2	protein-coding	5.73	6.34	-1.52	1.15e-05	0.0003
TCAIM	T cell activation inhibitor, mitochondrial	protein-coding	2.55	3.15	-1.52	1.15e-05	0.0003
SMC6	structural maintenance of chromosomes 6	protein-coding	3.83	4.44	-1.52	9.94e-06	0.0002
PSMG2	proteasome assembly chaperone 2	protein-coding	5.67	6.27	-1.52	5.21e-06	0.0001
ZNF800	zinc finger protein 800	protein-coding	4.22	4.83	-1.52	3.11e-06	9.03e-05
PHF20L1	PHD finger protein 20 like 1	protein-coding	5.65	6.25	-1.52	2.91e-06	8.55e-05
CBX5	chromobox 5	protein-coding	6.05	6.65	-1.52	1.28e-06	4.46e-05
APPL1	adaptor protein, phosphotyrosine interacting with PH domain and leucine zipper 1	protein-coding	4.47	5.07	-1.52	1.12e-06	4.03e-05
ELP1	elongator acetyltransferase complex subunit 1	protein-coding	4.94	5.54	-1.52	1.06e-06	3.9e-05
ST3GAL5	ST3 beta-galactoside alpha-2,3-sialyltransferase 5	protein-coding	0.62	1.23	-1.52	9.46e-07	3.57e-05
GPATCH4	G-patch domain containing 4	protein-coding	2.84	3.45	-1.52	7.05e-07	2.89e-05
ZNF432	zinc finger protein 432	protein-coding	3.76	4.37	-1.52	1.69e-07	9.62e-06
NSD3	nuclear receptor binding SET domain protein 3	protein-coding	4.43	5.03	-1.52	1.35e-07	8.11e-06
GK5	glycerol kinase 5	protein-coding	2.49	3.09	-1.52	1.04e-07	6.55e-06
LRP1	LDL receptor related protein 1	protein-coding	9.69	10.29	-1.52	7.71e-08	5.24e-06
SS18	SS18 subunit of BAF chromatin remodeling complex	protein-coding	6.12	6.72	-1.52	7.38e-08	5.09e-06
ATG2B	autophagy related 2B	protein-coding	5.1	5.71	-1.52	9.49e-09	1.13e-06
ZNF841	zinc finger protein 841	protein-coding	4.84	5.45	-1.52	7.48e-09	9.67e-07
PSMA3-AS1	PSMA3 antisense RNA 1	ncRNA	3.41	4.02	-1.52	5.38e-09	7.72e-07
ZNF445	zinc finger protein 445	protein-coding	4.04	4.64	-1.52	1.8e-09	3.25e-07
BMPR2	bone morphogenetic protein receptor type 2	protein-coding	6.86	7.47	-1.52	6.97e-10	1.58e-07
MFSD8	major facilitator superfamily domain containing 8	protein-coding	2.67	3.27	-1.52	3.53e-10	9.3e-08
AKAP9	A-kinase anchoring protein 9	protein-coding	3.74	4.34	-1.51	0.0004	0.0038
TRMT9B	tRNA methyltransferase 9B (putative)	protein-coding	1.83	2.42	-1.51	0.0003	0.0031
TTC3P1	tetratricopeptide repeat domain 3 pseudogene 1	pseudo	1.85	2.44	-1.51	0.0003	0.0028
CYP2U1	cytochrome P450 family 2 subfamily U member 1	protein-coding	3.59	4.18	-1.51	0.0002	0.0023
STARD4	StAR related lipid transfer domain containing 4	protein-coding	4.05	4.65	-1.51	0.0002	0.002
DMD	dystrophin	protein-coding	-0.05	0.54	-1.51	0.0002	0.002
LIPA	lipase A, lysosomal acid type	protein-coding	6.04	6.64	-1.51	0.0002	0.0019
ZNF670	zinc finger protein 670	protein-coding	2	2.59	-1.51	0.0001	0.0014
LDAF1	lipid droplet assembly factor 1	protein-coding	4.11	4.71	-1.51	8.19e-05	0.0011
RNF217	ring finger protein 217	protein-coding	4.05	4.64	-1.51	3.54e-05	0.0006
ZNF382	zinc finger protein 382	protein-coding	1.63	2.22	-1.51	1.58e-05	0.0003
STAM	signal transducing adaptor molecule	protein-coding	4	4.59	-1.51	1.57e-05	0.0003
RARA	retinoic acid receptor alpha	protein-coding	4.52	5.12	-1.51	1.52e-05	0.0003
B4GALT4	beta-1,4-galactosyltransferase 4	protein-coding	5.75	6.34	-1.51	1.39e-05	0.0003
RER1	retention in endoplasmic reticulum sorting receptor 1	protein-coding	5.09	5.68	-1.51	1.12e-05	0.0002
NUBPL	nucleotide binding protein like	protein-coding	2.62	3.21	-1.51	9.11e-06	0.0002
VN1R1	vomeronasal 1 receptor 1	protein-coding	0.96	1.56	-1.51	6.61e-06	0.0002
METAP2	methionyl aminopeptidase 2	protein-coding	5.92	6.52	-1.51	4.63e-06	0.0001
BICD1	BICD cargo adaptor 1	protein-coding	0.85	1.44	-1.51	3.04e-06	8.88e-05
SH3GL1P1	SH3 domain containing GRB2 like 1, endophilin A2 pseudogene 1	pseudo	1.11	1.7	-1.51	1.35e-06	4.66e-05
ALG13	ALG13 UDP-N-acetylglucosaminyltransferase subunit	protein-coding	3.98	4.57	-1.51	7.32e-07	2.96e-05
CTNNA1	catenin alpha 1	protein-coding	8.44	9.04	-1.51	2.66e-07	1.35e-05
TTC7A	tetratricopeptide repeat domain 7A	protein-coding	4.68	5.28	-1.51	1.41e-07	8.28e-06
ABCC5	ATP binding cassette subfamily C member 5	protein-coding	3.71	4.3	-1.51	4.41e-08	3.44e-06
TRPM4	transient receptor potential cation channel subfamily M member 4	protein-coding	2.6	3.2	-1.51	6.18e-09	8.49e-07
ZNF766	zinc finger protein 766	protein-coding	3.52	4.12	-1.51	1.57e-09	2.94e-07
TLK2	tousled like kinase 2	protein-coding	5.49	6.08	-1.51	1.02e-09	2.22e-07
UBL3	ubiquitin like 3	protein-coding	6.57	7.16	-1.5	0.0012	0.0091
CEP162	centrosomal protein 162	protein-coding	2.69	3.28	-1.5	0.0004	0.0037
FYCO1	FYVE and coiled-coil domain autophagy adaptor 1	protein-coding	5.18	5.76	-1.5	0.0002	0.0023
MEG8	maternally expressed 8, small nucleolar RNA host gene	ncRNA	3.49	4.08	-1.5	8.48e-05	0.0012
DYNC2H1	dynein cytoplasmic 2 heavy chain 1	protein-coding	4.52	5.11	-1.5	4.46e-05	0.0007
TFRC	transferrin receptor	protein-coding	6.57	7.15	-1.5	4.46e-05	0.0007
UBR4	ubiquitin protein ligase E3 component n-recognin 4	protein-coding	7.45	8.04	-1.5	2.71e-05	0.0005
RB1	RB transcriptional corepressor 1	protein-coding	5.26	5.84	-1.5	2.7e-05	0.0005
ODF2L	outer dense fiber of sperm tails 2 like	protein-coding	2.62	3.21	-1.5	1.35e-05	0.0003
LUC7L3	LUC7 like 3 pre-mRNA splicing factor	protein-coding	5.77	6.36	-1.5	7.26e-06	0.0002
TRPC1	transient receptor potential cation channel subfamily C member 1	protein-coding	3.8	4.39	-1.5	2.66e-06	8e-05
FAM76B	family with sequence similarity 76 member B	protein-coding	3.04	3.63	-1.5	2.44e-06	7.42e-05
DNAJB14	DnaJ heat shock protein family (Hsp40) member B14	protein-coding	4.61	5.2	-1.5	1.85e-06	5.93e-05
PPP4R1L	protein phosphatase 4 regulatory subunit 1 like (pseudogene)	pseudo	2.52	3.11	-1.5	1.31e-06	4.54e-05
IFT46	intraflagellar transport 46	protein-coding	4.7	5.28	-1.5	7.22e-07	2.93e-05
ZDHHC17	zinc finger DHHC-type palmitoyltransferase 17	protein-coding	4.51	5.1	-1.5	4.75e-07	2.13e-05
STXBP3	syntaxin binding protein 3	protein-coding	5.43	6.02	-1.5	2.86e-07	1.42e-05
ASH2L	ASH2 like, histone lysine methyltransferase complex subunit	protein-coding	4.42	5	-1.5	2.82e-07	1.41e-05
TSPYL6	TSPY like 6	protein-coding	0.18	0.77	-1.5	1.85e-07	1.02e-05
PPIP5K1	diphosphoinositol pentakisphosphate kinase 1	protein-coding	3.63	4.22	-1.5	1.83e-07	1.01e-05
CDK17	cyclin dependent kinase 17	protein-coding	5.24	5.83	-1.5	2.77e-08	2.44e-06
RAD54L2	RAD54 like 2	protein-coding	3.11	3.7	-1.5	9.65e-09	1.13e-06
HPS5	HPS5 biogenesis of lysosomal organelles complex 2 subunit 2	protein-coding	4.63	5.22	-1.5	6.2e-09	8.49e-07
EMP2	epithelial membrane protein 2	protein-coding	6.49	5.9	1.51	7.74e-05	0.0011
ARAP3	ArfGAP with RhoGAP domain, ankyrin repeat and PH domain 3	protein-coding	4.21	3.62	1.51	4.48e-06	0.0001
CIB2	calcium and integrin binding family member 2	protein-coding	2.67	2.06	1.52	0.0004	0.004
CPNE2	copine 2	protein-coding	4.79	4.18	1.52	3.89e-07	1.82e-05
H2BC15	H2B clustered histone 15	protein-coding	5.05	4.44	1.53	0.0006	0.0055
MMD	monocyte to macrophage differentiation associated	protein-coding	3.03	2.41	1.53	6.59e-05	0.001
NPAS2	neuronal PAS domain protein 2	protein-coding	6.25	5.64	1.53	4.71e-05	0.0007
DMC1	DNA meiotic recombinase 1	protein-coding	4.13	3.51	1.54	0.0002	0.0027
LINC01426	long intergenic non-protein coding RNA 1426	ncRNA	2.67	2.04	1.54	8.65e-05	0.0012
H2AC4	H2A clustered histone 4	protein-coding	3.2	2.56	1.56	0.0008	0.0069
ADGRG1	adhesion G protein-coupled receptor G1	protein-coding	2.01	1.37	1.56	0.0008	0.0066
TNFRSF1B	TNF receptor superfamily member 1B	protein-coding	3.83	3.18	1.56	0.0006	0.0056
CCDC7	coiled-coil domain containing 7	protein-coding	4.73	4.09	1.56	1.11e-06	4.01e-05
ADAMDEC1	ADAM like decysin 1	protein-coding	0.41	-0.23	1.56	2.26e-07	1.19e-05
ZNF22	zinc finger protein 22	protein-coding	3.02	2.38	1.56	1.75e-08	1.78e-06
LCTL	lactase like	protein-coding	1.21	0.55	1.58	0.0003	0.0032
RAMP2	receptor activity modifying protein 2	protein-coding	1.77	1.11	1.58	7.81e-05	0.0011
NUAK2	NUAK family kinase 2	protein-coding	3.82	3.16	1.58	1.31e-05	0.0003
PLTP	phospholipid transfer protein	protein-coding	4.49	3.82	1.59	0.0002	0.0023
HS3ST3B1	heparan sulfate-glucosamine 3-sulfotransferase 3B1	protein-coding	4.06	3.39	1.59	8.74e-05	0.0012
PMAIP1	phorbol-12-myristate-13-acetate-induced protein 1	protein-coding	2.55	1.88	1.59	6.68e-05	0.001
GPRC5C	G protein-coupled receptor class C group 5 member C	protein-coding	1.1	0.42	1.6	0.0008	0.0066
VANGL2	VANGL planar cell polarity protein 2	protein-coding	0.71	0.03	1.6	0.0007	0.006
STAC	SH3 and cysteine rich domain	protein-coding	4.77	4.1	1.6	1.72e-05	0.0003
LRMDA	leucine rich melanocyte differentiation associated	protein-coding	2.94	2.26	1.61	0.001	0.008
BASP1	brain abundant membrane attached signal protein 1	protein-coding	4.72	4.03	1.61	6.19e-06	0.0002
NBPF15	NBPF member 15	protein-coding	0.58	-0.11	1.61	3.66e-06	0.0001
SV2A	synaptic vesicle glycoprotein 2A	protein-coding	4.18	3.49	1.62	4.01e-05	0.0007
H2AC21	H2A clustered histone 21	protein-coding	4.54	3.84	1.62	1.5e-05	0.0003
AKR1B1	aldo-keto reductase family 1 member B	protein-coding	6.41	5.72	1.62	2.42e-07	1.25e-05
CTSH	cathepsin H	protein-coding	2.46	1.76	1.63	0.0007	0.0064
TMEM132A	transmembrane protein 132A	protein-coding	5.21	4.5	1.63	5.55e-05	0.0008
GTPBP2	GTP binding protein 2	protein-coding	6.69	5.98	1.63	7.06e-07	2.89e-05
LAMB3	laminin subunit beta 3	protein-coding	2.75	2.03	1.65	0.0009	0.0073
MLPH	melanophilin	protein-coding	2.03	1.31	1.65	0.0007	0.0062
S100A2	S100 calcium binding protein A2	protein-coding	3.12	2.4	1.65	0.0005	0.0047
ARG2	arginase 2	protein-coding	2.77	2.05	1.65	5.48e-05	0.0008
CSF3	colony stimulating factor 3	protein-coding	0.64	-0.09	1.66	0.0004	0.0036
SRPX	sushi repeat containing protein X-linked	protein-coding	6.9	6.15	1.67	0.0006	0.0051
EPB41L3	erythrocyte membrane protein band 4.1 like 3	protein-coding	6.65	5.91	1.67	0.0003	0.0031
ARHGEF19	Rho guanine nucleotide exchange factor 19	protein-coding	4.52	3.78	1.67	0.0001	0.0017
KCNG1	potassium voltage-gated channel modifier subfamily G member 1	protein-coding	3.82	3.08	1.67	4.85e-05	0.0008
POU2F2-AS1	POU2F2 antisense RNA 1	ncRNA	1.39	0.65	1.67	2.88e-05	0.0005
IL1RN	interleukin 1 receptor antagonist	protein-coding	0.79	0.06	1.67	2.57e-05	0.0005
MT1E	metallothionein 1E	protein-coding	6.39	5.64	1.68	6.99e-05	0.001
NQO1	NAD(P)H quinone dehydrogenase 1	protein-coding	7.62	6.87	1.68	4.01e-06	0.0001
BARD1	BRCA1 associated RING domain 1	protein-coding	4.04	3.29	1.68	1.74e-07	9.75e-06
PCDHAC2	protocadherin alpha subfamily C, 2	protein-coding	1.29	0.54	1.69	0.0002	0.002
CD40	CD40 molecule	protein-coding	3.46	2.71	1.69	0.0001	0.0017
IL4I1	interleukin 4 induced 1	protein-coding	0.84	0.08	1.69	1.08e-06	3.95e-05
FIBIN	fin bud initiation factor homolog	protein-coding	6.38	5.61	1.7	0.0012	0.0095
ADORA1	adenosine A1 receptor	protein-coding	1.48	0.71	1.7	7.6e-07	3.05e-05
UBALD2	UBA like domain containing 2	protein-coding	6.48	5.72	1.7	2.24e-11	1.16e-08
MAGED4B	MAGE family member D4B	protein-coding	4.27	3.48	1.72	1.44e-10	4.91e-08
IGSF3	immunoglobulin superfamily member 3	protein-coding	1.57	0.79	1.73	0.0005	0.005
PCDHGA11	protocadherin gamma subfamily A, 11	protein-coding	4.2	3.42	1.73	6.89e-07	2.84e-05
CTSS	cathepsin S	protein-coding	1.68	0.89	1.74	0.0008	0.0067
CYYR1	cysteine and tyrosine rich 1	protein-coding	0.92	0.11	1.75	1.8e-05	0.0004
LOXL3	lysyl oxidase like 3	protein-coding	5.9	5.09	1.76	0.0002	0.0024
H2BC4	H2B clustered histone 4	protein-coding	5.19	4.38	1.76	0.0001	0.0014
CCL7	C-C motif chemokine ligand 7	protein-coding	1.46	0.63	1.77	2.5e-05	0.0005
VDR	vitamin D receptor	protein-coding	6.66	5.84	1.77	5.53e-08	4.13e-06
PF4V1	platelet factor 4 variant 1	protein-coding	0.82	-0.01	1.78	0.0003	0.0029
CCL8	C-C motif chemokine ligand 8	protein-coding	0.63	-0.2	1.78	3.95e-09	6.05e-07
TRIM16L	tripartite motif containing 16 like	pseudo	3.51	2.67	1.79	0.0001	0.0017
H3C11	H3 clustered histone 11	protein-coding	6.45	5.6	1.8	1.96e-05	0.0004
SLC22A4	solute carrier family 22 member 4	protein-coding	3.08	2.23	1.8	5.3e-07	2.3e-05
TRIM16	tripartite motif containing 16	protein-coding	5.4	4.54	1.8	5.07e-08	3.86e-06
H2BC10	H2B clustered histone 10	protein-coding	2.33	1.48	1.81	0.0005	0.0047
GMFG	glia maturation factor gamma	protein-coding	1.08	0.21	1.82	0.0002	0.0023
H2AC16	H2A clustered histone 16	protein-coding	2.78	1.91	1.83	0.0011	0.009
TRIB3	tribbles pseudokinase 3	protein-coding	8.09	7.22	1.83	1.97e-05	0.0004
H2AC11	H2A clustered histone 11	protein-coding	4.37	3.49	1.84	0.0012	0.0091
TUBA4A	tubulin alpha 4a	protein-coding	2.67	1.79	1.85	2.67e-05	0.0005
KCNE3	potassium voltage-gated channel subfamily E regulatory subunit 3	protein-coding	1.84	0.95	1.86	2.12e-06	6.6e-05
CCL5	C-C motif chemokine ligand 5	protein-coding	0.71	-0.19	1.87	0.0002	0.0022
SALL1	spalt like transcription factor 1	protein-coding	3.71	2.78	1.9	3.96e-05	0.0006
C1QTNF1	C1q and TNF related 1	protein-coding	3.67	2.74	1.92	4.29e-06	0.0001
TNFRSF21	TNF receptor superfamily member 21	protein-coding	5.65	4.69	1.95	0.0001	0.0013
CD82	CD82 molecule	protein-coding	3.55	2.59	1.95	2.17e-05	0.0004
NETO2	neuropilin and tolloid like 2	protein-coding	3.97	2.98	1.98	6.74e-05	0.001
PNKD	PNKD metallo-beta-lactamase domain containing	protein-coding	3.09	2.1	1.98	3.63e-05	0.0006
TNC	tenascin C	protein-coding	10.75	9.75	2	4.92e-06	0.0001
DGAT2	diacylglycerol O-acyltransferase 2	protein-coding	2.73	1.72	2.02	1.3e-05	0.0003
H2AC17	H2A clustered histone 17	protein-coding	4.78	3.75	2.04	3.13e-05	0.0005
H3C12	H3 clustered histone 12	protein-coding	4.69	3.66	2.05	0.0007	0.0062
QPRT	quinolinate phosphoribosyltransferase	protein-coding	2.52	1.49	2.05	0.0001	0.0016
CD163	CD163 molecule	protein-coding	1.62	0.59	2.05	5.79e-07	2.48e-05
CRYBG1	crystallin beta-gamma domain containing 1	protein-coding	4.03	2.96	2.1	0.0008	0.007
H2AC13	H2A clustered histone 13	protein-coding	4.08	3.02	2.1	0.0003	0.003
LAMC3	laminin subunit gamma 3	protein-coding	1.14	0.05	2.13	1.58e-10	5.3e-08
WASHC1	WASH complex subunit 1	protein-coding	2.5	1.38	2.18	8.07e-07	3.16e-05
ARSI	arylsulfatase family member I	protein-coding	3.12	2	2.18	2.34e-08	2.16e-06
GBP5	guanylate binding protein 5	protein-coding	2.17	1.01	2.23	3.08e-05	0.0005
POU2F2	POU class 2 homeobox 2	protein-coding	2.75	1.59	2.25	1.23e-06	4.3e-05
PRDM1	PR/SET domain 1	protein-coding	4.63	3.45	2.27	9.86e-06	0.0002
H3C2	H3 clustered histone 2	protein-coding	6.12	4.93	2.29	0.001	0.0078
TNFAIP6	TNF alpha induced protein 6	protein-coding	5.57	4.37	2.31	0.0007	0.0062
WWC1	WW and C2 domain containing 1	protein-coding	3.44	2.21	2.34	0.0001	0.0017
CCL2	C-C motif chemokine ligand 2	protein-coding	7.23	6.01	2.34	6.91e-05	0.001
IL32	interleukin 32	protein-coding	5.62	4.37	2.38	0.0005	0.0047
PHACTR1	phosphatase and actin regulator 1	protein-coding	2.25	1	2.39	1.24e-05	0.0003
MDFI	MyoD family inhibitor	protein-coding	2.3	1	2.47	0.001	0.008
SPON1	spondin 1	protein-coding	3.1	1.78	2.5	0.0012	0.0093
KCNJ15	potassium inwardly rectifying channel subfamily J member 15	protein-coding	3.33	2	2.52	3.85e-08	3.1e-06
APOE	apolipoprotein E	protein-coding	3.32	1.96	2.58	0.0003	0.0031
GNAO1	G protein subunit alpha o1	protein-coding	1.55	0.13	2.67	2.75e-12	2.18e-09
TSPAN18	tetraspanin 18	protein-coding	5.33	3.91	2.68	1.15e-05	0.0003
SLC1A3	solute carrier family 1 member 3	protein-coding	4.62	3.16	2.77	0.0002	0.0019
LINC00623	long intergenic non-protein coding RNA 623	ncRNA	2.42	0.94	2.79	1.27e-07	7.77e-06
RBP1	retinol binding protein 1	protein-coding	2.15	0.66	2.82	4.03e-07	1.86e-05
PTPRN	protein tyrosine phosphatase receptor type N	protein-coding	5.23	3.72	2.84	0.0005	0.0047
INHBE	inhibin subunit beta E	protein-coding	3.18	1.65	2.88	8.01e-07	3.16e-05
MAP7	microtubule associated protein 7	protein-coding	3.96	2.41	2.91	3.01e-08	2.59e-06
CYP7B1	cytochrome P450 family 7 subfamily B member 1	protein-coding	3.14	1.58	2.95	0.0001	0.0018
TMEM176B	transmembrane protein 176B	protein-coding	1.86	0.1	3.38	1.8e-06	5.84e-05
CXCL8	C-X-C motif chemokine ligand 8	protein-coding	4.62	2.83	3.44	0.0003	0.0035
RIPOR3	RIPOR family member 3	protein-coding	2.93	1.06	3.65	6e-05	0.0009
CXCL3	C-X-C motif chemokine ligand 3	protein-coding	3.03	1.02	4.03	1.51e-06	5.05e-05
IFI27	interferon alpha inducible protein 27	protein-coding	4.13	1.93	4.61	9.73e-06	0.0002
CXCL1	C-X-C motif chemokine ligand 1	protein-coding	5.01	2.79	4.65	2.68e-05	0.0005
MMP3	matrix metallopeptidase 3	protein-coding	4.71	2.43	4.86	5.12e-05	0.0008
CXCL5	C-X-C motif chemokine ligand 5	protein-coding	2.39	0.08	4.96	9.06e-07	3.45e-05
CES1	carboxylesterase 1	protein-coding	3.62	0.98	6.22	1.92e-09	3.42e-07
MMP1	matrix metallopeptidase 1	protein-coding	4.94	1.92	8.08	9.24e-11	3.37e-08
CXCL6	C-X-C motif chemokine ligand 6	protein-coding	5.61	2.06	11.77	3.02e-07	1.47e-05
