# Supplementary material for: RNA-Seq of Dermal Fibroblasts from Patients with Hypermobile Ehlers–Danlos Syndrome and Hypermobility Spectrum Disorders Supports Their Categorization as a Single Entity with Involvement of Extracellular Matrix Degrading and Proinflammatory Pathomechanisms
Source: Cells. 2022 Dec 14;11(24):4040. doi: 10.3390/cells11244040 (PMC9777098; doi:10.3390/cells11244040)
Supplement: Supplementary file 1 [file cells-11-04040-s001.zip › Supplementary materials/Table S3.xlsx]

## Sheet: GO_BP
Table S3: GO enrichemnt analysis of 952 DEGs in hEDS/HSD cells based on the category Biological Process (BP)
Term	Count	%	log10( p-value)	p-value	Genes	List Total	Pop Hits	Pop Total	Fold Enrichment	Bonferroni	Benjamini	FDR
GO:0016477~cell migration	29	3.02714	4.82381	1.50036e-05	FOXE1, ITGB5, LAMC3, WWC1, LAMA3, NTN4, NEDD9, PTPRF, PIK3C2B, SYDE2, VTN, ADGRG1, CTNNA1, WWC3, HES1, CCN2, CARMIL1, LAMB3, USP45, EMP2, RHOB, APC, PIK3CA, PEAK1, RHOJ, FAT1, SNAI1, ITGBL1, ADAM9	832	268	19256	2.50441	0.0552207	0.0568035	0.0566684
GO:0043547~positive regulation of GTPase activity	22	2.29645	4.18593	6.51735e-05	CD40, RALGAPA1, DOCK9, DENND1A, DOCK7, F2R, ARAP3, USP17L2, GNAO1, DOCK11, TBC1D2, CCL8, CCL7, RASA1, CHN2, CCL5, CCL2, SNX9, SMCR8, FERMT2, RAB3GAP1, WNT4	832	188	19256	2.70837	0.218668	0.0652082	0.0650531
GO:0006468~protein phosphorylation	42	4.38413	4.15997	6.9188e-05	DYRK3, BMPR2, CCNT1, LRRK2, GMFG, STK39, CSF2RB, RABGEF1, NUAK1, NUAK2, GRK5, STK38, TLK2, PTK2B, CCL2, STK38L, MAP4K5, FNIP2, JAK1, CDK17, PLK3, SMAD1, MAP3K1, RIOK3, PLK2, NEK7, PAQR3, ADAM10, CLK4, TGFBR1, ACVR2A, PTPRA, PEAK1, WNK1, STK17A, TAOK1, RARA, NEK10, SIK1, TRIB3, BIRC6, CDK13	832	501	19256	1.94023	0.230454	0.0652082	0.0650531
GO:0045944~positive regulation of transcription from RNA polymerase II promoter	81	8.45511	4.15161	7.0533e-05	RB1, CSRNP1, ZNF131, CSF3, CD40, BMPR2, CCNT1, PTPRN, ARID4B, ASH2L, YBX1, PKD2, IL4I1, SALL1, DPF3, EP300, PITX2, ZNF841, ZNF445, KLF10, OSR2, SS18, SLC30A9, NCOA3, OSR1, ATRX, LMO7, AP3B1, FOS, ELF1, ZNF91, ZEB1, MAF, DMTF1, NCL, RARA, ATF3, FOXC2, TNKS, KMT2C, PIK3R2, FOXO1, NPAS2, FSTL3, GLIS2, NPAT, HLTF, HES1, SF3B1, WNT2, ZNF300, SMAD1, ZFHX3, POU2F1, CDKN2A, NFYB, PCGF5, VDR, CDC5L, POU2F…	832	1201	19256	1.56093	0.234363	0.0652082	0.0650531
GO:0007155~cell adhesion	45	4.69729	4.06491	8.61175e-05	SEMA5A, SRPX, SPON1, TNXB, TNFAIP6, ITGB5, LAMA3, TNC, NEDD9, NEXN, ARHGAP5, HAPLN3, PTPRF, ADAMTSL1, COMP, CDH6, VTN, ADGRG1, NUAK1, ADGRE5, CTNNA1, CCL2, HES1, IGFBP7, CCN2, MYH10, PCDHAC2, IL32, POSTN, DST, EMP2, PCDHB13, RHOB, PARD3B, PCDHGA11, VCAN, APC, CERCAM, FAT1, MXRA8, ITGBL1, CD9, ADAM9, MFGE8, FERMT2	832	557	19256	1.86982	0.278234	0.0652082	0.0650531
GO:0000122~negative regulation of transcription from RNA polymerase II promoter	67	6.99374	3.82075	0.000151094	RB1, ZNF131, BTG2, FOXE1, WWC1, FHL2, ARID4B, YBX1, PRDM1, N4BP2L2, CDC73, ZFP36, MAGED4B, SALL1, ZNF529, WWC3, ANKRD1, EP300, LRRFIP1, PITX2, ZFP37, AASS, KLF10, OSR2, OSR1, ZNF10, DICER1, HCFC2, ZEB1, MAF, IFI27, CRY2, RARA, TRIB3, ATF3, MDFI, ZNF431, FOXC2, DDX5, CTR9, FOXO1, GLIS2, TPR, HES1, FNIP2, SKIL, PLK3, ZFHX3, CBX5, VDR, CBX1, KLF4, MEIS2, BMP6, KLF2, BMP4, NR4A2, PER1, PER3, NFIB, BH…	832	967	19256	1.60358	0.435652	0.0953403	0.0951136
GO:0007229~integrin-mediated signaling pathway	15	1.56576	3.5633	0.000273339	ADAMDEC1, ITGB5, DST, LAMA3, NEDD9, ADAM10, PTPRA, CTNNA1, PTK2B, ITGBL1, ADAM9, CCN2, LAT, FERMT2, LIMS2	832	110	19256	3.15603	0.644775	0.147837	0.147486
GO:0030335~positive regulation of cell migration	25	2.6096	3.49905	0.000316921	SEMA5A, CEMIP, SEMA3C, TNFAIP6, NEDD9, CCL7, CCL5, MGAT5, PTK2B, CTSH, WASHC1, SEMA4A, CARMIL1, FZD4, F2R, ADAM10, TGFBR1, TJP1, PTP4A1, APC, RUFY3, SNAI1, ADAM9, CEP43, FERMT2	832	256	19256	2.26018	0.698822	0.149983	0.149626
GO:0044344~cellular response to fibroblast growth factor stimulus	8	0.835073	3.36239	0.000434125	SETX, NR4A1, ZFP36, POSTN, CXCL8, CCL5, CCL2, CDC5L	832	33	19256	5.61072	0.806785	0.166638	0.166242
GO:0030501~positive regulation of bone mineralization	9	0.939457	3.35641	0.000440143	BMP4, OSR2, BMPR2, PKDCC, VDR, OSR1, ACVR2A, BMP6, WNT4	832	43	19256	4.84414	0.81114	0.166638	0.166242
GO:0060021~palate development	11	1.14823	3.3011	0.000499922	OSR2, CSRNP1, FRAS1, PKDCC, INTU, INSIG2, OSR1, LOXL3, SNAI1, CPLANE1, TGFBR1	832	66	19256	3.85737	0.849408	0.172064	0.171655
GO:0001657~ureteric bud development	8	0.835073	3.12033	0.000757998	BMP4, SMAD1, FOXC2, ARG2, SALL1, OSR1, RARA, CRLF1	832	36	19256	5.14316	0.94335	0.234462	0.233904
GO:0070098~chemokine-mediated signaling pathway	11	1.14823	3.09417	0.000805071	CXCL6, CCL8, CXCL8, CCL7, CCL5, PTK2B, CCL2, CXCL1, CXCL3, CXCL5, PF4V1	832	70	19256	3.63695	0.952604	0.234462	0.233904
GO:0006974~cellular response to DNA damage stimulus	25	2.6096	3.0323	0.000928316	BTG2, SETD7, ASH2L, FMN2, SMC6, FOXO1, NPAS2, UFL1, NUAK1, ZMAT3, TLK2, PMAIP1, POLK, MACROD2, BARD1, PLK3, CBX5, UBE2B, INTS3, CBX1, SETX, APC, TAOK1, RAD17, CUL4B	832	276	19256	2.0964	0.970289	0.251043	0.250446
GO:0035556~intracellular signal transduction	35	3.65344	2.93729	0.00115533	CXCL8, TFRC, LRRK2, STK39, CBLB, CXCL1, FMN2, NUAK1, DEPTOR, NUAK2, CHN2, STK38, TLK2, SH3BP5, STK38L, CCN2, MAP4K5, STK32B, JAK1, SS18, UNC13A, IGFBP5, STAC, DUSP1, DCLK2, TGFBR1, KCTD9, WNK1, STK17A, TAOK1, RASA1, SIK1, DGKI, LAT, RAB40AL	832	450	19256	1.80011	0.987432	0.291605	0.290912
GO:0043066~negative regulation of apoptotic process	39	4.07098	2.85295	0.00140297	DYRK3, TFRC, FHL2, AKR1B1, FMN2, FOXO1, CDC73, SH3RF1, COMP, UFL1, NUAK2, GRK5, ADORA1, PTK2B, CTSH, CAPN3, ERC1, BARD1, TNFSF18, NQO1, PLK3, UBE2B, API5, DUSP1, OSR1, PLK2, ADAM10, TGFBR1, BMP4, SETX, TJP1, AHI1, RASA1, MDM2, PDCD4, BIRC6, PSMG2, TEK, LIMS2	832	526	19256	1.71602	0.995085	0.331977	0.331188
GO:0035264~multicellular organism growth	12	1.25261	2.77467	0.00168009	COMP, CLIC4, PKDCC, ATRX, RARA, EP300, ADARB1, ERCC6, GIGYF2, KLF2, PLEC, ZMPSTE24	832	90	19256	3.0859	0.998281	0.35728	0.356431
GO:0032092~positive regulation of protein binding	11	1.14823	2.7699	0.00169864	BMP4, VTN, CSF3, SPON1, RAMP2, LRP1, STING1, PLK2, LRRK2, EP300, TRIB3	832	77	19256	3.30632	0.998398	0.35728	0.356431
GO:0046907~intracellular transport	8	0.835073	2.64734	0.00225246	RGPD6, AP3B1, RASSF9, HPS5, FMN2, APOE, RGPD2, RGPD1	832	43	19256	4.3059	0.999804	0.448833	0.447766
GO:0003281~ventricular septum development	7	0.730689	2.58715	0.0025873	SALL1, MDM2, TRIP11, HES1, FRS2, CPLANE1, PRDM1	832	33	19256	4.90938	0.999945	0.489776	0.488612
GO:0030593~neutrophil chemotaxis	11	1.14823	2.56351	0.00273208	CXCL6, CCL8, CXCL8, CCL7, CCL5, SRP54, CCL2, CXCL1, CXCL3, CXCL5, PF4V1	832	82	19256	3.10471	0.999968	0.492554	0.491384
GO:0048844~artery morphogenesis	6	0.626305	2.49893	0.0031701	COMP, FOXC2, HES1, APOE, PRDM1, TGFBR1	832	24	19256	5.78606	0.999994	0.545545	0.544248
GO:0006954~inflammatory response	31	3.23591	2.44602	0.00358083	CXCL6, IL1RN, CD40, CXCL8, TNFAIP6, STK39, LOXL3, CXCL1, CXCL3, LIPA, CXCL5, CCL8, ADGRE5, CCL7, CCL5, ADORA1, CCL2, OLR1, PF4V1, MAP2K3, GBP5, SMAD1, F2R, AP3B1, FOS, TNFRSF1B, HSPG2, BMP6, NLRP10, REL, LAT	832	411	19256	1.74567	0.999999	0.564618	0.563276
GO:0000165~MAPK cascade	14	1.46138	2.44485	0.00359049	MAP2K3, SMAD1, MAP3K1, LRRK2, USP17L2, SETX, PPP1CC, ZFP36, TAOK1, CCL5, PTK2B, CCL2, MBP, MAP4K5	832	128	19256	2.5314	0.999999	0.564618	0.563276
GO:0007049~cell cycle	28	2.92276	2.42109	0.00379234	RB1, DYRK3, CCNT1, CCNH, NEDD9, CDC73, PPP1CC, RGS2, RASSF2, EPB41L2, TLK2, EP300, RIOK2, APPL1, CENPT, CDKN2A, DUSP1, CDC5L, USP17L2, PARD3B, PTP4A1, NEDD1, DMTF1, SASS6, RAD17, SIK1, BIRC6, AVPI1	832	359	19256	1.80512	0.999999	0.564618	0.563276
GO:0000902~cell morphogenesis	11	1.14823	2.41145	0.00387746	CDH6, SS18, VDR, CDH10, SHROOM3, AP3B1, FRY, LIPA, CERT1, KLF2, PLEC	832	86	19256	2.96031	1	0.564618	0.563276
GO:0030199~collagen fibril organization	9	0.939457	2.38931	0.00408024	COMP, FOXC2, TNXB, TNXA, LOX, PTPRQ, COL14A1, LOXL3, TGFBR1	832	60	19256	3.47163	1	0.565068	0.563725
GO:0071222~cellular response to lipopolysaccharide	18	1.87891	2.36829	0.00428263	MAP2K3, CXCL6, CSF3, CD40, CXCL8, CTR9, CXCL1, CXCL3, TNFRSF1B, CXCL5, CDC73, ZFP36, PDCD4, ANKRD1, RARA, CCL2, ADAM9, PF4V1	832	193	19256	2.15853	1	0.565068	0.563725
GO:0030155~regulation of cell adhesion	9	0.939457	2.34461	0.00452264	VTN, NUAK1, CXCL8, TNXB, TNXA, LAMA3, TNC, PTK2B, LMO7	832	61	19256	3.41472	1	0.565068	0.563725
GO:0030509~BMP signaling pathway	11	1.14823	2.33938	0.0045774	SPART, BMP4, COMP, SMAD1, DDX5, BMPR2, PDCD4, HES1, GDF6, ACVR2A, BMP6	832	88	19256	2.89303	1	0.565068	0.563725
GO:0060173~limb development	7	0.730689	2.32858	0.00469262	COMP, BMPR2, SALL1, INTU, RARA, FERMT2, LNPK	832	37	19256	4.37864	1	0.565068	0.563725
GO:0006869~lipid transport	11	1.14823	2.30428	0.00496274	OSBPL9, ABCA10, ABCA5, ABCA6, VPS13C, ABCA9, VPS13A, APOE, PLTP, CERT1, GULP1	832	89	19256	2.86052	1	0.565068	0.563725
GO:0043116~negative regulation of vascular permeability	5	0.521921	2.28193	0.00522476	AKAP12, TJP1, RAMP2, DDAH1, FERMT2	832	17	19256	6.80713	1	0.565068	0.563725
GO:1990869~cellular response to chemokine	5	0.521921	2.28193	0.00522476	SLC12A2, LOX, DUSP1, WNK1, STK39	832	17	19256	6.80713	1	0.565068	0.563725
GO:0001822~kidney development	13	1.35699	2.27291	0.00533445	DYNC2H1, C1GALT1, CPLANE1, RPGRIP1L, PRDM1, SULF1, TGFBR1, BMP6, FSTL3, SULF2, BMP4, SALL1, WNT4	832	119	19256	2.52836	1	0.565068	0.563725
GO:0071347~cellular response to interleukin-1	11	1.14823	2.26978	0.00537307	AKAP12, CD40, CCL8, CXCL8, PTGIS, CCL7, CCL5, ANKRD1, CCL2, HES1, KLF2	832	90	19256	2.82874	1	0.565068	0.563725
GO:0045444~fat cell differentiation	10	1.04384	2.23605	0.00580698	NR4A2, CLIP3, C1QTNF3, NR4A1, GRK5, ID4, EP300, KLF4, GDF6, FOXO1	832	77	19256	3.00574	1	0.578559	0.577184
GO:0045638~negative regulation of myeloid cell differentiation	5	0.521921	2.18767	0.00649123	CTR9, LEO1, PTK2B, MEIS2, CDC73	832	18	19256	6.42895	1	0.630149	0.628651
GO:0032526~response to retinoic acid	8	0.835073	2.1743	0.00669416	TFRC, DUSP1, RARA, CTSH, IGFBP7, TRIM16, KLF4, BMP6	832	52	19256	3.56065	1	0.633602	0.632096
GO:0008360~regulation of cell shape	15	1.56576	2.1369	0.0072963	SEMA4A, SHROOM3, ARAP3, ATP10A, RHOB, ZMPSTE24, CCL7, RASA1, EPB41L3, RHOJ, PLXNA2, PTK2B, CCL2, MYH10, FERMT2	832	155	19256	2.23976	1	0.654425	0.652869
GO:0002062~chondrocyte differentiation	8	0.835073	2.12885	0.00743272	RB1, BMP4, OSR2, WNT2B, NFIB, OSR1, CCN2, LTBP3	832	53	19256	3.49347	1	0.654425	0.652869
GO:0043491~protein kinase B signaling	8	0.835073	2.12885	0.00743272	SETX, PLK3, CD40, PIK3CA, LOX, CCL5, CCL2, PIK3C2B	832	53	19256	3.49347	1	0.654425	0.652869
GO:0030282~bone mineralization	8	0.835073	2.08461	0.00822982	KLF10, COMP, PKDCC, ANKH, LOX, LTBP3, AXIN2, ZMPSTE24	832	54	19256	3.42877	1	0.683659	0.682034
GO:0032870~cellular response to hormone stimulus	6	0.626305	2.06611	0.00858787	RAMP2, DUSP1, NCOA3, FOSB, IGFBP7, FOS	832	30	19256	4.62885	1	0.683659	0.682034
GO:0043153~entrainment of circadian clock by photoperiod	6	0.626305	2.06611	0.00858787	PER1, PPP1CC, PER3, CRY2, BHLHE40, SIK1	832	30	19256	4.62885	1	0.683659	0.682034
GO:0001580~detection of chemical stimulus involved in sensory perception of bitter taste	7	0.730689	2.05411	0.00882857	TAS2R50, TAS2R30, TAS2R20, TAS2R13, TAS2R46, TAS2R14, TAS2R19	832	42	19256	3.85737	1	0.683659	0.682034
GO:0010628~positive regulation of gene expression	35	3.65344	2.05315	0.0088482	MYOM1, RAMP2, CXCL8, TFRC, TNC, FTX, PRDM1, PKD2, C1QTNF1, TTC21B, KCNQ1OT1, TP53INP1, CTSH, HES1, CCN2, IL32, OSR2, SMAD1, TLE1, CDKN2A, VDR, OSR1, KLF4, TGFBR1, BMP6, BMP4, MED23, OLFM1, MAF, FUBP1, ID4, RARA, MDM2, ERCC6, ATF3	832	513	19256	1.57904	1	0.683659	0.682034
GO:0010976~positive regulation of neuron projection development	13	1.35699	2.02648	0.00940846	TENM3, NEGR1, FBXO38, MAGI2, SNX3, SETX, RGS2, ANKRD1, PTK2B, EP300, ROR1, DMD, APOE	832	128	19256	2.35059	1	0.699482	0.697819
GO:0006607~NLS-bearing protein import into nucleus	5	0.521921	2.01779	0.00959855	RGPD6, CBLB, KPNA5, RGPD2, RGPD1	832	20	19256	5.78606	1	0.699482	0.697819
GO:0060070~canonical Wnt signaling pathway	11	1.14823	2.01382	0.00968684	NR4A2, WNT2B, FZD4, LRRK2, FZD6, FZD8, KLF4, WNT2, RECK, FOXO1, WNT4	832	98	19256	2.59782	1	0.699482	0.697819
GO:0051726~regulation of cell cycle	24	2.50522	1.98223	0.0104177	BARD1, RB1, CDK17, ZFHX3, CXCL8, CDKN2A, DUSP1, MAGI2, JADE1, ADAM10, ADARB1, PKD2, TGFBR1, APC, GRK5, TP53INP1, JMY, MDM2, DMD, CCNL2, SRSF5, CDK13, CCNL1, SKIL	832	316	19256	1.75779	1	0.699482	0.697819
GO:0006355~regulation of transcription, DNA-templated	59	6.15866	1.97782	0.010524	RB1, ZMYND8, WWC1, SETD7, JADE1, JMJD1C, ARID4B, YBX1, RPL6, EFEMP1, ZNF529, ZNF84, WWC3, ZNF766, ERC1, LRRFIP1, PITX2, ZNF841, ZNF445, ZFP37, TLE1, ZNF480, ZNF160, ATRX, ZNF10, HCFC2, TGFBR1, PHF20L1, MED23, ZNF91, DMTF1, TRIM16, LRIF1, ZNF432, VGLL3, ZNF431, ZNF195, KMT2C, CTR9, ZNF22, GLIS2, NSD3, ZNF708, TAF1D, TP53INP1, HES1, DMD, ZNF300, HES4, SMAD1, ZFHX3, ZNF382, NFYB, FUS, MEIS2, NFIA, F…	832	985	19256	1.3863	1	0.699482	0.697819
GO:0035115~embryonic forelimb morphogenesis	6	0.626305	1.94665	0.0113071	OSR2, OSR1, RDH10, RPGRIP1L, RECK, LNPK	832	32	19256	4.33954	1	0.735352	0.733604
GO:0045104~intermediate filament cytoskeleton organization	5	0.521921	1.94083	0.0114595	DSP, MACF1, SYNM, DST, PLEC	832	21	19256	5.51053	1	0.735352	0.733604
GO:2000134~negative regulation of G1/S transition of mitotic cell cycle	8	0.835073	1.91881	0.0120556	RB1, CACNB4, APC, JADE1, CCL2, KLF4, PKD2, CDC73	832	58	19256	3.19231	1	0.76071	0.758902
GO:0030198~extracellular matrix organization	15	1.56576	1.91021	0.0122967	POSTN, TNXB, TNXA, COL14A1, MMP1, MMP3, HSD17B12, KAZALD1, THSD4, ADAMTSL1, VTN, CCDC80, ST7, SERAC1, RECK	832	165	19256	2.10402	1	0.763204	0.76139
GO:0001525~angiogenesis	20	2.08768	1.87437	0.0133545	SEMA4A, CLIC4, RAMP2, CXCL8, C1GALT1, FZD8, HSPG2, RHOB, ATP5IF1, ADGRG1, PIK3CA, CALD1, NCL, RHOJ, PTK2B, CCL2, TEK, CCN2, SLC12A6, MFGE8	832	252	19256	1.83684	1	0.764959	0.763141
GO:0030500~regulation of bone mineralization	5	0.521921	1.86847	0.0135373	COMP, ANKH, PTK2B, SGMS2, ZMPSTE24	832	22	19256	5.26005	1	0.764959	0.763141
GO:0006915~apoptotic process	39	4.07098	1.85226	0.014052	CSRNP1, PRUNE2, JADE1, HTT, MRPS30, FOXO1, COMP, NUAK2, DPP8, GRK5, ZMAT3, TP53INP1, EPB41L3, PTK2B, CTSH, EP300, PMAIP1, CAPN3, SRGN, PLK3, UBE2B, CDKN2A, API5, USP17L2, SULF1, GDF6, TGFBR1, RHOB, GULP1, NR4A1, SLTM, IFI27, STK17A, MDM2, PDCD4, TNFRSF25, BIRC6, BLID, TNFRSF21	832	607	19256	1.48703	1	0.782365	0.780505
GO:0042476~odontogenesis	6	0.626305	1.83684	0.01456	BMP4, OSR2, OSR1, ZNF22, AXIN2, PITX2	832	34	19256	4.08428	1	0.7989	0.797
GO:0045892~negative regulation of transcription, DNA-templated	38	3.9666	1.82722	0.0148861	RB1, FOXE1, ZMYND8, LOXL3, SUMO4, FOXO1, GLIS2, NPAT, SALL1, BASP1, ANKRD1, DPF3, CAPN3, HES1, WNT4, KLF10, POU2F1, CBX5, TLE1, CDKN2A, ATP8B1, VDR, CBX1, KLF4, PHC3, BMP4, PER1, ZNF91, ZEB1, CRY2, BHLHE40, ID4, RARA, MDM2, PDCD4, TRIB3, MPHOSPH8, LHX9	832	590	19256	1.49065	1	0.805124	0.80321
GO:0008285~negative regulation of cell proliferation	31	3.23591	1.79496	0.0160341	BTG2, CXCL8, CXCL1, ADARB1, PKD2, CDC73, ADGRG1, TP53INP1, ADORA1, PTK2B, IGFBP7, KLF10, SMAD1, PBRM1, CDKN2A, DUSP1, VDR, H2AC4, MAGI2, F2R, AXIN2, KLF4, BMP4, FABP3, CACNB4, ZEB1, APC, DDAH1, PMP22, RARA, CD9	832	459	19256	1.56312	1	0.827659	0.825691
GO:0009888~tissue development	6	0.626305	1.78518	0.0163992	POSTN, LAMB3, LAMC3, LAMA3, NTN4, HSPG2	832	35	19256	3.96758	1	0.827659	0.825691
GO:0031032~actomyosin structure organization	6	0.626305	1.78518	0.0163992	TJP1, LIMCH1, EPB41L2, EPB41L3, PHACTR1, MYH10	832	35	19256	3.96758	1	0.827659	0.825691
GO:0009267~cellular response to starvation	9	0.939457	1.78205	0.0165178	KLF10, BMPR2, WNT2B, LRRK2, VPS41, JMY, FOXO1, PIK3C2B, WNT4	832	76	19256	2.74076	1	0.827659	0.825691
GO:0051591~response to cAMP	7	0.730689	1.77923	0.0166252	PER1, DUSP1, PTPRN, FOSB, PTK2B, FOS, TEK	832	48	19256	3.3752	1	0.827659	0.825691
GO:0001889~liver development	10	1.04384	1.75108	0.0177387	UPF2, PIK3CA, MAN2A1, RARA, HES1, AK4, RPGRIP1L, PKD2, WNT4, ZMPSTE24	832	92	19256	2.51568	1	0.850108	0.848088
GO:0070542~response to fatty acid	5	0.521921	1.7358	0.0183737	FABP3, INSIG2, MBP, CCN2, FOXO1	832	24	19256	4.82171	1	0.862868	0.860817
GO:0045860~positive regulation of protein kinase activity	8	0.835073	1.73375	0.0184607	MAP2K3, RASSF2, MMD, LRRK2, PTK2B, SNX9, AXIN2, LAT	832	63	19256	2.93895	1	0.862868	0.860817
GO:0001649~osteoblast differentiation	12	1.25261	1.71164	0.0194248	BMP4, UFL1, VCAN, BMPR2, IGFBP5, LOX, FHL2, SNAI1, ID4, TNC, AXIN2, BMP6	832	125	19256	2.22185	1	0.896859	0.894727
GO:0010862~positive regulation of pathway-restricted SMAD protein phosphorylation	7	0.730689	1.69826	0.0200328	BMP4, BMPR2, GDF6, TGFBR1, ACVR2A, BMP6, INHBE	832	50	19256	3.24019	1	0.898532	0.896396
GO:0071356~cellular response to tumor necrosis factor	13	1.35699	1.67539	0.0211161	POSTN, CD40, CXCL8, KLF2, AKAP12, ZFP36, CCL8, CCL7, CCL5, ANKRD1, CCL2, HES1, TNFRSF21	832	143	19256	2.10402	1	0.91864	0.916456
GO:0031648~protein destabilization	7	0.730689	1.65951	0.0219023	CDKN2A, MDM2, EP300, HTT, CTSH, CAPN3, CDC73	832	51	19256	3.17666	1	0.91864	0.916456
GO:0090630~activation of GTPase activity	12	1.25261	1.64336	0.0227319	SYDE2, TBCK, TBC1D2, SIPA1L1, TBC1D3, RALGAPA1, DOCK7, ARHGEF19, NEDD9, PTK2B, TBC1D12, NGEF	832	128	19256	2.16977	1	0.91864	0.916456
GO:0016055~Wnt signaling pathway	16	1.67015	1.63742	0.023045	MACF1, TLE1, WNT2B, FZD4, TNKS, CTR9, TMEM131L, AXIN2, PKD2, CDC73, APC, GRK5, LEO1, WNT2, FERMT2, WNT4	832	196	19256	1.88932	1	0.91864	0.916456
GO:0016485~protein processing	9	0.939457	1.6308	0.0233993	SRGN, DYNC2H1, COMP, SPON1, ADAM9, ADAM10, PCSK6, CTSS, METAP2	832	81	19256	2.57158	1	0.91864	0.916456
GO:0007162~negative regulation of cell adhesion	7	0.730689	1.62186	0.023886	SEMA5A, ADAMDEC1, DUSP1, RASA1, PLXNA2, TNC, ADAM10	832	52	19256	3.11557	1	0.91864	0.916456
GO:0050714~positive regulation of protein secretion	7	0.730689	1.62186	0.023886	MYOM1, SEC24A, ANKRD1, ADAM9, MYH10, BMP6, EXPH5	832	52	19256	3.11557	1	0.91864	0.916456
GO:0031175~neuron projection development	12	1.25261	1.62123	0.0239207	RB1, GNAO1, BTG2, NEGR1, DOCK7, TNC, PTK2B, ERCC6, APOE, FRY, BTBD8, CUL4B	832	129	19256	2.15295	1	0.91864	0.916456
GO:0008104~protein localization	13	1.35699	1.61289	0.0243843	LRBA, LRRK2, VPS13A, AXIN2, SEPTIN11, MLH3, PARD3B, AHI1, HEATR5A, ID4, CTNNA1, DMD, PLEC	832	146	19256	2.06079	1	0.91864	0.916456
GO:0006357~regulation of transcription from RNA polymerase II promoter	92	9.60334	1.6022	0.0249921	RB1, CSRNP1, ZNF131, FOXE1, CCNT1, CCNH, JADE1, JMJD1C, ARID4B, PRDM1, SALL1, ZNF529, ZNF84, ANKRD1, DPF3, CCNL2, LRRFIP1, CCNL1, PITX2, ZNF841, ZNF445, ZFP37, HMGN1, KLF10, OSR2, SS18, ZNF121, PBRM1, ZNF480, OSR1, ZNF160, EBF1, ZNF10, FOS, HCFC2, POU5F2, PHF20L1, MED23, ELF1, ZNF91, ZEB1, MAF, DMTF1, SLTM, SCAND2P, ZNF432, ATF3, KDM7A, VGLL3, FOXC2, ZNF670, DDX5, ZNF195, ZNF22, FOXO1, ZBTB41, NP…	832	1721	19256	1.23723	1	0.91864	0.916456
GO:0030177~positive regulation of Wnt signaling pathway	6	0.626305	1.59726	0.0252779	MACF1, SALL1, FZD4, SULF1, CDC73, SULF2	832	39	19256	3.56065	1	0.920214	0.918027
GO:0030036~actin cytoskeleton organization	15	1.56576	1.57763	0.0264465	TNXB, ARPC1A, CXCL1, TBCK, DIAPH3, NUAK2, PIK3CA, DAAM1, RHOJ, CAPZA2, DMD, PHACTR1, UTRN, PDLIM5, SPTAN1	832	182	19256	1.90749	1	0.953587	0.95132
GO:0045893~positive regulation of transcription, DNA-templated	43	4.48852	1.57226	0.0267758	FOXC2, FOXE1, WWC1, SETD7, JADE1, FOXO1, NPAS2, GLIS2, NSD3, NPAT, SALL1, TP53INP1, ANKRD1, EP300, CAPN3, APOE, WNT4, MAP2K3, OSR2, ZFHX3, FZD4, CDKN2A, FUS, F2R, FOS, HCFC2, KLF4, GDF6, TGFBR1, TDRD3, MID2, KLF2, BMP4, CNOT6, ELF1, NFIB, JMY, REL, SNAI1, RARA, TRIP11, TRIM16, KDM7A	832	716	19256	1.38995	1	0.95635	0.954077
GO:0034332~adherens junction organization	5	0.521921	1.56194	0.0274194	DSP, CDH6, CDH10, ADAM10, PLEC	832	27	19256	4.28597	1	0.961202	0.958917
GO:0051493~regulation of cytoskeleton organization	5	0.521921	1.56194	0.0274194	TJP1, CLIC4, TAOK1, AFAP1, NEXN	832	27	19256	4.28597	1	0.961202	0.958917
GO:0071407~cellular response to organic cyclic compound	7	0.730689	1.51503	0.0305469	SMAD1, IGFBP5, STING1, CCL5, LRRK2, ANKRD1, CCL2	832	55	19256	2.94563	1	1	0.997886
GO:0042733~embryonic digit morphogenesis	7	0.730689	1.51503	0.0305469	BMP4, OSR2, SALL1, INTU, OSR1, CPLANE1, LNPK	832	55	19256	2.94563	1	1	0.997886
GO:0000226~microtubule cytoskeleton organization	12	1.25261	1.51497	0.030551	EML4, SS18, DST, TAOK1, DOCK7, MAP7, DCLK2, PHLDB2, MID1, TUBA4A, CFAP44, PARD3B	832	134	19256	2.07262	1	1	0.997886
GO:0009791~post-embryonic development	8	0.835073	1.47977	0.0331305	NR4A2, BMP4, CSRNP1, SZT2, SEMA3C, PRDM1, TGFBR1, GIGYF2	832	71	19256	2.6078	1	1	0.997886
GO:0032922~circadian regulation of gene expression	8	0.835073	1.47977	0.0331305	PER1, PPP1CC, ZFHX3, PER3, CRY2, BHLHE40, ID4, NPAS2	832	71	19256	2.6078	1	1	0.997886
GO:0006469~negative regulation of protein kinase activity	8	0.835073	1.47977	0.0331305	RB1, DBNDD2, DEPTOR, CDKN2A, TRIB3, SMCR8, CEP43, PLEC	832	71	19256	2.6078	1	1	0.997886
GO:0001501~skeletal system development	12	1.25261	1.47445	0.0335387	COMP, VCAN, PKDCC, EVC, RASSF2, ANKH, VDR, NPR3, HAPLN3, PAPSS2, TGFBR1, BMP6	832	136	19256	2.04214	1	1	0.997886
GO:0001656~metanephros development	5	0.521921	1.45977	0.0346921	OSR2, FOXC2, RDH10, CTSH, GDF6	832	29	19256	3.99038	1	1	0.997886
GO:0008284~positive regulation of cell proliferation	34	3.54906	1.45709	0.0349064	CSF3, TNC, ASH2L, HAPLN3, CXCL5, UFL1, GRK5, PTK2B, CTSH, HES1, DMD, CCN2, WNT2, TRPM4, OSR2, SS18, F2R, ADAM10, NAP1L1, EMP2, MEIS2, TGFBR1, BMP6, BMP4, TJP1, BST1, CNOT6, RARA, MDM2, BIRC6, CDK13, CEP43, ATF3, CRLF1	832	549	19256	1.43334	1	1	0.997886
GO:0006897~endocytosis	16	1.67015	1.439	0.0363912	CD163, LRP1, SORT1, DENND1A, LRRK2, LOXL3, FNBP1L, PRSS12, EEA1, MYO1E, RABGEF1, VTN, HEATR5A, RHOJ, OLR1, SNX9	832	208	19256	1.78033	1	1	0.997886
GO:0034446~substrate adhesion-dependent cell spreading	7	0.730689	1.4166	0.0383179	LAMB3, FZD4, PEAK1, LAMC3, NTN4, TEK, FERMT2	832	58	19256	2.79327	1	1	0.997886
GO:0050909~sensory perception of taste	5	0.521921	1.4122	0.0387081	TAS2R30, TAS2R20, TAS2R13, TAS2R46, TAS2R19	832	30	19256	3.85737	1	1	0.997886
GO:0051602~response to electrical stimulus	5	0.521921	1.4122	0.0387081	AKAP12, NQO1, NR4A1, BTG2, AKAP9	832	30	19256	3.85737	1	1	0.997886
GO:0071300~cellular response to retinoic acid	8	0.835073	1.39576	0.0402017	SETX, FZD4, OSR1, RARA, TNC, PTK2B, KLF4, WNT2	832	74	19256	2.50208	1	1	0.997886
GO:0030336~negative regulation of cell migration	14	1.46138	1.39555	0.0402209	CLIC4, IGFBP5, LIMCH1, ZMYND8, MAGI2, NEDD9, ARID4B, ADARB1, SULF1, RHOB, TP53INP1, RECK, SRGAP2B, WNT4	832	175	19256	1.85154	1	1	0.997886
GO:0010506~regulation of autophagy	8	0.835073	1.36895	0.042761	MFSD8, LRRK2, TP53INP1, EP300, PIK3R2, TRIB3, SMCR8, ZMPSTE24	832	75	19256	2.46872	1	1	0.997886
GO:0051281~positive regulation of release of sequestered calcium ion into cytosol	5	0.521921	1.36675	0.0429784	CEMIP, TRPC1, F2R, CAPN3, AKAP6	832	31	19256	3.73294	1	1	0.997886
GO:0006342~chromatin silencing	6	0.626305	1.36127	0.0435237	H2AC11, H2AC13, H2AC4, H2AC21, H2AC16, H2AC17	832	45	19256	3.0859	1	1	0.997886
GO:0043407~negative regulation of MAP kinase activity	6	0.626305	1.36127	0.0435237	BMP4, RGS2, DUSP1, STK38, PAQR3, APOE	832	45	19256	3.0859	1	1	0.997886
GO:0071277~cellular response to calcium ion	9	0.939457	1.34566	0.0451171	CLIC4, SYT12, WNK1, FUS, FOSB, CAPN3, FOS, CPNE2, PKD2	832	92	19256	2.26411	1	1	0.997886
GO:0051216~cartilage development	7	0.730689	1.32565	0.0472445	SMAD1, ZEB1, EVC, TRIP11, SULF1, BMP6, SULF2	832	61	19256	2.6559	1	1	0.997886
GO:0001938~positive regulation of endothelial cell proliferation	8	0.835073	1.31704	0.0481898	BMP4, SEMA5A, NR4A1, BMPR2, TEK, WNT2, TGFBR1, BMP6	832	77	19256	2.4046	1	1	0.997886
GO:0032868~response to insulin	8	0.835073	1.31704	0.0481898	FABP3, STXBP3, SORT1, INSIG2, VPS13C, PTPRN, CRY2, GCNT1	832	77	19256	2.4046	1	1	0.997886
GO:0018105~peptidyl-serine phosphorylation	14	1.46138	1.2984	0.050304	DYRK3, TNKS, PLK2, LRRK2, NEK7, STK39, DCLK2, TGFBR1, RPS6KA6, WNK1, STK38, TLK2, STK38L, STK32B	832	181	19256	1.79016	1	1	0.997886
GO:0060071~Wnt signaling pathway, planar cell polarity pathway	5	0.521921	1.28166	0.0522806	VANGL2, DAAM1, FZD6, ARHGEF19, ROR1	832	33	19256	3.5067	1	1	0.997886
GO:0001558~regulation of cell growth	8	0.835073	1.2673	0.0540379	IGFBP5, EPB41L3, CRIM1, JADE1, TNC, IGFBP7, KAZALD1, CDC73	832	79	19256	2.34372	1	1	0.997886
GO:0035914~skeletal muscle cell differentiation	6	0.626305	1.25977	0.0549837	RB1, NR4A1, BTG2, ANKRD1, FOS, ATF3	832	48	19256	2.89303	1	1	0.997886
GO:0006366~transcription from RNA polymerase II promoter	17	1.77453	1.24443	0.0569598	RB1, SMAD1, CCNT1, CCNH, ATRX, ARID4B, FOS, KLF4, NR4A2, BMP4, NR4A1, MAF, TRIP11, EP300, FOSB, ERCC6, PAXBP1	832	240	19256	1.63938	1	1	0.997886
GO:0034613~cellular protein localization	7	0.730689	1.24141	0.0573572	AHI1, LRRK2, CTNNA1, DMD, AXIN2, SEPTIN11, PLEC	832	64	19256	2.5314	1	1	0.997886
GO:0030168~platelet activation	7	0.730689	1.24141	0.0573572	CD40, PIK3CA, FZD6, F2R, CD9, DGKI, PF4V1	832	64	19256	2.5314	1	1	0.997886
GO:0060395~SMAD protein signal transduction	7	0.730689	1.24141	0.0573572	BMP4, SMAD1, MAGI2, FOS, GDF6, BMP6, INHBE	832	64	19256	2.5314	1	1	0.997886
GO:0007399~nervous system development	26	2.71399	1.23812	0.0577933	SEMA5A, INTU, CXCL1, GDPD5, ADGRG1, ADORA1, DPF3, EP300, HES1, PCDHAC2, SRGAP2B, HES4, SEMA4A, MAGI2, CRIM1, VPS13A, NAP1L1, FOS, TGFBR1, SETX, OLFM1, PCDHGA11, ZEB1, APC, RUFY3, NGEF	832	414	19256	1.4535	1	1	0.997886
GO:0010718~positive regulation of epithelial to mesenchymal transition	6	0.626305	1.22801	0.0591552	BMP4, OLFM1, SNAI1, AXIN2, FERMT2, TGFBR1	832	49	19256	2.83399	1	1	0.997886
GO:0032436~positive regulation of proteasomal ubiquitin-dependent protein catabolic process	8	0.835073	1.2196	0.060311	ANKIB1, PLK2, LRRK2, RNF217, MDM2, TRIB3, AXIN2, SH3RF1	832	81	19256	2.28585	1	1	0.997886
GO:0065003~macromolecular complex assembly	12	1.25261	1.18644	0.0650968	CD40, APC, EPRS1, WIPF1, CAPZA2, MDM2, PTK2B, CAPN3, HES1, SNX9, DMD, DNAJB14	832	152	19256	1.82718	1	1	0.997886
GO:0017148~negative regulation of translation	8	0.835073	1.17384	0.0670125	BTG2, RGS2, IGFBP5, EPRS1, NCL, RARA, YBX1, GIGYF2	832	83	19256	2.23077	1	1	0.997886
GO:0007517~muscle organ development	9	0.939457	1.17202	0.0672946	ZFHX3, EVC, BTBD1, SGCB, CAPN3, DPF3, DMD, PAXBP1, UTRN	832	100	19256	2.08298	1	1	0.997886
GO:0034097~response to cytokine	6	0.626305	1.16734	0.0680238	GNAO1, OXTR, RARA, REL, FOS, SKIL	832	51	19256	2.72285	1	1	0.997886
GO:0042552~myelination	6	0.626305	1.16734	0.0680238	MALL, PMP22, ORMDL1, MBP, FAM126A, TNFRSF21	832	51	19256	2.72285	1	1	0.997886
GO:0003333~amino acid transmembrane transport	5	0.521921	1.16676	0.0681141	SLC36A1, SLC7A6, SLC38A1, SLC7A5P2, SLC7A5P1	832	36	19256	3.21448	1	1	0.997886
GO:0048662~negative regulation of smooth muscle cell proliferation	5	0.521921	1.16676	0.0681141	BMPR2, IGFBP5, NPR3, APOE, KLF4	832	36	19256	3.21448	1	1	0.997886
GO:0051017~actin filament bundle assembly	5	0.521921	1.16676	0.0681141	BAIAP2L1, CALD1, NEDD9, PLS3, DMD	832	36	19256	3.21448	1	1	0.997886
GO:0006641~triglyceride metabolic process	5	0.521921	1.16676	0.0681141	GK5, SLC22A4, TNXB, INSIG2, APOE	832	36	19256	3.21448	1	1	0.997886
GO:0072593~reactive oxygen species metabolic process	5	0.521921	1.16676	0.0681141	ATP5IF1, SESN1, LRRK2, PMAIP1, CCN2	832	36	19256	3.21448	1	1	0.997886
GO:0000281~mitotic cytokinesis	7	0.730689	1.16323	0.0686708	APC, RASA1, EFHC1, SNX9, EXOC6, MYH10, RHOB	832	67	19256	2.41805	1	1	0.997886
GO:0007179~transforming growth factor beta receptor signaling pathway	9	0.939457	1.15202	0.0704662	SMAD1, ITGB5, ADAM9, FOS, LTBP3, SKIL, FERMT2, TGFBR1, APPL1	832	101	19256	2.06236	1	1	0.997886
GO:0034976~response to endoplasmic reticulum stress	8	0.835073	1.15166	0.0705245	UFL1, SRPX, CXCL8, TMTC3, CREBRF, PIK3R2, TRIB3, CERT1	832	84	19256	2.20421	1	1	0.997886
GO:0010595~positive regulation of endothelial cell migration	7	0.730689	1.13841	0.0727092	BMP4, FOXC2, BMPR2, ANXA3, PTK2B, TEK, RHOB	832	68	19256	2.38249	1	1	0.997886
GO:0007267~cell-cell signaling	16	1.67015	1.13169	0.0738424	TNFSF18, SEMA5A, KLF10, CXCL6, TNFAIP6, ADAM10, CXCL5, ADGRG1, CCL8, ADGRE5, CCL7, CCL5, ADORA1, FAT1, TEK, WNT2	832	230	19256	1.61003	1	1	0.997886
GO:0032570~response to progesterone	5	0.521921	1.13146	0.0738824	RAMP2, OXTR, FOSB, MBP, FOS	832	37	19256	3.1276	1	1	0.997886
GO:2001237~negative regulation of extrinsic apoptotic signaling pathway	5	0.521921	1.13146	0.0738824	BMP4, HTT, BIRC6, TGFBR1, SH3RF1	832	37	19256	3.1276	1	1	0.997886
GO:0009887~animal organ morphogenesis	11	1.14823	1.12121	0.0756468	COMP, TLE1, LAMB3, LAMC3, TMEM176B, LAMA3, NTN4, EP300, CCL2, MEIS2, HSPG2	832	138	19256	1.84483	1	1	0.997886
GO:0010629~negative regulation of gene expression	20	2.08768	1.11971	0.0759078	RB1, NDFIP2, CXCL8, LRP1, VDR, ADAM10, DICER1, PRDM1, KLF4, BMP4, OLFM1, C1QTNF3, PIK3CA, TP53INP1, REL, SMCR8, HES1, CCN2, APOE, WNT4	832	308	19256	1.50287	1	1	0.997886
GO:0043065~positive regulation of apoptotic process	21	2.19207	1.11516	0.0767086	BARD1, CDKN2A, DUSP1, ADAM10, HTT, FOXO1, TGFBR1, RHOB, IFIT2, BMP4, CLIP3, OLFM1, NR4A1, RASSF2, APC, ZMAT3, STK17A, TP53INP1, JMY, ANKRD1, PMAIP1	832	328	19256	1.4818	1	1	0.997886
GO:0042060~wound healing	9	0.939457	1.11307	0.0770786	DSP, MACF1, POSTN, DST, LOX, ARHGEF19, TNC, TGFBR1, PLEC	832	103	19256	2.02231	1	1	0.997886
GO:0030838~positive regulation of actin filament polymerization	6	0.626305	1.11021	0.0775873	CARMIL1, CSF3, BAIAP2L1, PTK2B, SNX9, FMN1	832	53	19256	2.6201	1	1	0.997886
GO:0008219~cell death	5	0.521921	1.09751	0.0798894	PMP22, OLR1, EMP2, AXIN2, OPTN	832	38	19256	3.04529	1	1	0.997886
GO:0007623~circadian rhythm	7	0.730689	1.09053	0.0811847	SETX, KLF10, PER1, CRY2, BHLHE40, KLF9, EP300	832	70	19256	2.31442	1	1	0.997886
GO:0009611~response to wounding	7	0.730689	1.09053	0.0811847	ZFP36, DST, F2R, TNC, SLC1A3, CCN2, SULF2	832	70	19256	2.31442	1	1	0.997886
GO:0042149~cellular response to glucose starvation	6	0.626305	1.08288	0.0826263	NUAK1, SZT2, NUAK2, SESN1, PMAIP1, SIK1	832	54	19256	2.57158	1	1	0.997886
GO:0010977~negative regulation of neuron projection development	7	0.730689	1.06742	0.0856204	LRP1, LRRK2, PAQR3, PMP22, MDM2, HES1, APOE	832	71	19256	2.28183	1	1	0.997886
GO:0051496~positive regulation of stress fiber assembly	6	0.626305	1.05634	0.0878342	CARMIL1, LIMCH1, CCN2, FERMT2, TGFBR1, WNT4	832	55	19256	2.52483	1	1	0.997886
GO:0043627~response to estrogen	7	0.730689	1.04486	0.090187	KRT19, PTPRN, CTNNA1, EP300, ASH2L, TEK, HAPLN3	832	72	19256	2.25013	1	1	0.997886
GO:0045595~regulation of cell differentiation	5	0.521921	1.03338	0.0926012	TNXB, APC, ST7, SIK1, KLF4	832	40	19256	2.89303	1	1	0.997886
GO:0048286~lung alveolus development	5	0.521921	1.03338	0.0926012	BMP4, BMPR2, PKDCC, IGFBP5, MAN2A1	832	40	19256	2.89303	1	1	0.997886
GO:0046854~phosphatidylinositol phosphorylation	6	0.626305	1.03054	0.093209	PIK3CA, PIK3R2, TTC7A, FAM126B, FAM126A, PIK3C2B	832	56	19256	2.47974	1	1	0.997886
GO:0007163~establishment or maintenance of cell polarity	6	0.626305	1.03054	0.093209	RHOJ, FAT1, CTNNA1, MAP7, RPGRIP1L, RHOB	832	56	19256	2.47974	1	1	0.997886
GO:0006816~calcium ion transport	8	0.835073	1.02757	0.0938493	RAMP2, CCL8, TRPC4, VDR, CCL5, TRPC1, CACNA2D1, PKD2	832	90	19256	2.05726	1	1	0.997886
GO:0045732~positive regulation of protein catabolic process	8	0.835073	1.02757	0.0938493	BARD1, APC, HECW2, PLK2, CREBRF, CBLB, FOXO1, CUL4B	832	90	19256	2.05726	1	1	0.997886
GO:0030324~lung development	8	0.835073	1.00829	0.0981087	LOX, LOXL3, EP300, HES1, CCN2, WNT2, LIPA, FSTL3	832	91	19256	2.03466	1	1	0.997886
GO:0043087~regulation of GTPase activity	8	0.835073	1.00829	0.0981087	SIPA1L1, CHN2, PLXNA2, CBLB, RAB3GAP1, DGKI, NGEF, ARHGAP12	832	91	19256	2.03466	1	1	0.997886
GO:0045766~positive regulation of angiogenesis	12	1.25261	1.00676	0.0984559	SEMA5A, RAMP2, CD40, CXCL8, PTGIS, DDAH1, ANXA3, CTSH, PTK2B, EMP2, TEK, RHOB	832	164	19256	1.69348	1	1	0.997886
GO:0045786~negative regulation of cell cycle	6	0.626305	1.00547	0.0987482	BARD1, RB1, BMP4, NR4A1, PDCD4, RHOB	832	57	19256	2.43623	1	1	0.997886
GO:0090263~positive regulation of canonical Wnt signaling pathway	9	0.939457	1.00407	0.0990671	SEMA5A, UBE2B, TNKS, WNK1, TTC21B, LRRK2, RECK, SULF2, TRPM4	832	109	19256	1.91099	1	1	0.997886
GO:0061844~antimicrobial humoral immune response mediated by antimicrobial peptide	9	0.939457	1.00407	0.0990671	CXCL6, CCL8, CXCL8, H2BC10, H2BC4, CXCL1, CXCL3, CXCL5, PF4V1	832	109	19256	1.91099	1	1	0.997886
GO:0007259~JAK-STAT cascade	5	0.521921	1.00307	0.0992952	CTR9, CCL2, CSF2RB, PKD2, JAK1	832	41	19256	2.82247	1	1	0.997886
GO:0016266~O-glycan processing	5	0.521921	1.00307	0.0992952	GALNT7, GALNT12, C1GALT1, GCNT1, GCNT4	832	41	19256	2.82247	1	1	0.997886
GO:0070301~cellular response to hydrogen peroxide	7	0.730689	1.00127	0.0997083	SETX, NQO1, MDM2, KLF4, FOXO1, KLF2, RHOB	832	74	19256	2.18932	1	1	0.997886

## Sheet: GO_MF
Table S3: GO enrichemnt analysis of 952 DEGs in hEDS/HSD cells based on the category Molecular Function (MF)
Term	Count	%	log10 (p-value)	p-value	Genes	List Total	Pop Hits	Pop Total	Fold Enrichment	Bonferroni	Benjamini	FDR
actin binding	37	3.86221	6.05747	8.76052e-07	MACF1, PLEKHH2, WIPF1, LRRK2, GMFG, ARPC1A, FMN1, FMN2, SYNE1, BAIAP2L1, CALD1, EPB41L2, EPB41L3, STK38L, EPS8L2, DMD, PHACTR1, PDLIM5, MYH10, SPTAN1, WASHC1, PLEKHG3, DST, LIMCH1, TNNC2, AFAP1, MYO1E, MYH2, DIAPH3, MLPH, DAAM1, ARPC3, JMY, CAPZA2, UTRN, FERMT2, PLEC	824	339	18811	2.49165	0.000859038	0.000859407	0.000852398
GO:0005515~protein binding	604	63.048	4.77003	1.69813e-05	RB1, TFRC, WIPF1, RAPH1, GPATCH4, ADARB1, SMC6, FNBP1L, H2AC16, H2AC17, RPL6, GLS, H2AC11, ATP5IF1, IL4I1, RABGEF1, H2AC13, MPRIP, SAMD12, GBP5, STARD4, TYW3, ZNF10, FRS2, DICER1, HCFC2, GTPBP2, HSPG2, EML4, EID3, DAAM1, TEP1, HECW2, RUFY3, RBP1, FAR1, TSPYL6, NGEF, ATF3, OPTN, GIGYF2, HSPH1, RDH10, EPB41L2, EPB41L3, CDK17, BARD1, PLK3, NDFIP2, FZD4, PLK2, FZD6, FZD8, PHC3, SETX, VANGL2, H2AC21, …	824	12539	18811	1.09966	0.0165208	0.0083293	0.00826138
protein kinase activity	35	3.65344	4.20104	6.29451e-05	DYRK3, PKDCC, LRRK2, STK39, RPS6KA6, NUAK1, CCL8, RASSF2, NUAK2, GRK5, CCL5, CCL2, STK38L, RIOK2, MAP4K5, STK32B, CDK17, MAP2K3, MAP3K1, MMD, NEK7, DCLK2, TGFBR1, TBCK, SLTM, PEAK1, WNK1, STK17A, TAOK1, NEK10, SIK1, TRIB3, ROR1, TEK, CDK13	824	379	18811	2.10821	0.0598831	0.020583	0.0204152
chemokine activity	10	1.04384	3.5524	0.000280285	CXCL6, CCL8, CXCL8, CCL7, CCL5, CCL2, CXCL1, CXCL3, CXCL5, PF4V1	824	50	18811	4.56578	0.240426	0.0630623	0.062548
CXCR chemokine receptor binding	6	0.626305	3.48213	0.00032951	CXCL6, CXCL8, CXCL1, CXCL3, CXCL5, PF4V1	824	15	18811	9.13155	0.276245	0.0630623	0.062548
fibronectin binding	8	0.835073	3.41375	0.000385702	CCDC80, IGFBP5, TNFAIP6, LOXL3, CCN2, HSD17B12, CTSS, FSTL3	824	32	18811	5.70722	0.315075	0.0630623	0.062548
integrin binding	18	1.87891	3.15193	0.000704812	TNXB, ITGB5, DST, LAMA3, ADAM10, CIB2, EMP2, HSPG2, COMP, VTN, CD9, ITGBL1, ADAM9, DMD, CCN2, UTRN, MFGE8, FERMT2	824	161	18811	2.5523	0.499258	0.0904504	0.0897128
cadherin binding	28	2.92276	3.13217	0.000737618	MACF1, BMPR2, DOCK9, FNBP1L, GIGYF2, RPL6, CDH6, MPRIP, CALD1, KIF5B, H3C11, STK38, H3C12, CTNNA1, EPS8L2, SNX9, H3C2, ERC1, LRRFIP1, SPTAN1, TRPC4, TJP1, TBC1D2, DIAPH3, GPRC5A, CDH10, PHLDB2, PLEC	824	316	18811	2.02281	0.515128	0.0904504	0.0897128
extracellular matrix structural constituent	16	1.67015	2.97612	0.00105652	SRPX, POSTN, SPON1, TNXB, LAMB3, COL14A1, LAMA3, FGL2, TNC, THSD4, COMP, VTN, FRAS1, EFEMP1, IGFBP7, MFGE8	824	138	18811	2.64683	0.64548	0.110835	0.109932
protein serine/threonine kinase activity	32	3.34029	2.94699	0.00112982	DYRK3, BMPR2, LRRK2, STK39, RPS6KA6, NUAK1, NUAK2, GRK5, STK38, TLK2, STK38L, RIOK2, MAP4K5, STK32B, CDK17, MAP2K3, PLK3, MAP3K1, RIOK3, PLK2, NEK7, DCLK2, CLK4, TGFBR1, ACVR2A, PIK3CA, WNK1, STK17A, TAOK1, NEK10, SIK1, CDK13	824	392	18811	1.86358	0.670105	0.110835	0.109932
bitter taste receptor activity	6	0.626305	2.84836	0.00141788	TAS2R50, TAS2R30, TAS2R20, TAS2R13, TAS2R46, TAS2R14	824	20	18811	6.84867	0.751404	0.126449	0.125418
GO:0008201~heparin binding	18	1.87891	2.72447	0.00188594	CXCL6, POSTN, TNXB, CXCL8, HSD17B12, PCSK6, SOD3, PTPRF, BMP4, COMP, VTN, ADGRG1, CCDC80, CCL8, CCL7, CCN2, APOE, PF4V1	824	176	18811	2.33477	0.843054	0.154175	0.152918
GO:0005524~ATP binding	92	9.60334	2.68672	0.0020572	DYRK3, BMPR2, LRRK2, DDX60L, SMC6, PIK3C2B, RPS6KA6, PPIP5K1, PPIP5K2, KIF5B, TLK2, RIOK2, STK32B, JAK1, DYNC2H1, MAP2K3, ABCC5, ATRX, RECQL, ATP11C, DICER1, TGFBR1, MYH2, ABCA10, PIK3CA, SLTM, TEP1, DMC1, TRIB3, ROR1, SIK1, RAD54L2, DGKI, SLC22A4, DDX5, DNAH1, PKDCC, YTHDC2, HSPA4L, ATP10D, STK39, AK4, ATP10A, SPATA5, PAPSS2, GK5, NUAK1, HSPH1, NUAK2, MTHFD1L, GRK5, STK38, HLTF, PTK2B, STK38L, T…	824	1544	18811	1.36027	0.867369	0.155239	0.153973
GO:0005518~collagen binding	10	1.04384	2.56253	0.00273825	COMP, VTN, ADGRG1, C1QTNF1, TNXB, LOX, COL14A1, ADAM9, HSD17B12, CTSS	824	68	18811	3.35719	0.932113	0.191873	0.190308
GO:0002039~p53 binding	10	1.04384	2.43356	0.00368506	PLK3, NUAK1, MUC1, TEP1, CDKN2A, SETD7, MDM2, ANKRD1, EP300, HTT	824	71	18811	3.21534	0.973263	0.238191	0.236248
GO:0030527~structural constituent of chromatin	12	1.25261	2.40029	0.00397838	H2AC11, H2AC13, H2BC15, H3C11, H2BC10, H2AC4, H3C12, H2AC21, H2BC4, H3C2, H2AC16, H2AC17	824	99	18811	2.76714	0.979971	0.238191	0.236248
GO:0031625~ubiquitin protein ligase binding	25	2.6096	2.3843	0.00412767	RB1, CD40, SMC6, FOXO1, HLTF, PTK2B, SNX9, WASHC1, JAK1, UBE2B, FZD4, FZD6, FZD8, AXIN2, TNFRSF1B, MID1, SPART, PER1, PER3, APC, STING1, MDM2, TRIB3, BLZF1, CUL4B	824	305	18811	1.87122	0.98271	0.238191	0.236248
GO:0051015~actin filament binding	20	2.08768	2.31736	0.0048155	MYOM1, MACF1, TNNC2, ARPC1A, NEXN, SHROOM3, ADD3, SYNE1, MYO1E, MYH2, MPRIP, ARPC3, CAPZA2, CTNNA1, PLS3, DMD, UTRN, MYH10, SPTAN1, FERMT2	824	225	18811	2.02923	0.991221	0.251501	0.24945
GO:0043621~protein self-association	10	1.04384	2.31238	0.00487106	EML4, KCTD9, TMEM43, CCL5, VPS41, ELP1, PTK2B, AGA, ACVR2A, PLEC	824	74	18811	3.08498	0.991689	0.251501	0.24945
GO:0008307~structural constituent of muscle	7	0.730689	1.97709	0.0105417	MYOM1, SYNM, KRT19, CAPN3, NEXN, DMD, PLEC	824	43	18811	3.71633	0.999969	0.51707	0.512854
GO:0019901~protein kinase binding	34	3.54906	1.78489	0.0164102	CCNT1, TFRC, STK39, BICD1, UFL1, PPP1CC, ZFP36, SV2A, SLC12A6, SLC12A2, MAP2K3, SMAD1, MAP3K1, CDKN2A, LRBA, CDC5L, ADAM10, EMP2, AXIN2, TUBA4A, RHOB, CACNB4, APC, STING1, WNK1, CRY2, SIK1, TRIB3, SMCR8, UTRN, CDK13, CEP43, LAT, FERMT2	824	510	18811	1.52193	1	0.678975	0.673438
GO:0005520~insulin-like growth factor binding	5	0.521921	1.78039	0.0165808	IGFBP5, CRIM1, IGFBP7, CCN2, KAZALD1	824	23	18811	4.9628	1	0.678975	0.673438
GO:0008013~beta-catenin binding	10	1.04384	1.77344	0.0168484	NR4A2, SALL1, APC, TRPC4, CTNNA1, EP300, ASH2L, AXIN2, KLF4, FOXO1	824	90	18811	2.53654	1	0.678975	0.673438
GO:0004860~protein kinase inhibitor activity	6	0.626305	1.76188	0.0173031	ITPRIP, WNK1, GMFG, SH3BP5, TRIB3, SMCR8	824	35	18811	3.91352	1	0.678975	0.673438
GO:0005200~structural constituent of cytoskeleton	11	1.14823	1.72621	0.0187842	DSP, SYNM, KRT19, ARPC3, EPB41L3, DMD, ADD3, SPTAN1, BICD1, TUBA4A, PLEC	824	107	18811	2.34689	1	0.708742	0.702962
GO:0003677~DNA binding	72	7.51566	1.59966	0.0251386	CCNT1, ARID4B, YBX1, H2AC16, H2AC17, RPL6, H2AC11, RABGEF1, H2AC13, ZFP36, ZNF84, ANKRD1, ZNF800, EP300, ZNF766, LRRFIP1, PITX2, HMGN1, PBRM1, H2AC4, ATRX, ZFR, RECQL, EBF1, FOS, DICER1, SRRM1, H2BC15, ZEB1, MAF, H2BC10, NCL, CRY2, DMC1, AKAP9, LUC7L3, TRIM16, RAD54L2, ATF3, KMT2C, ZNF22, NPAS2, TAF1D, H3C11, H3C12, HLTF, HES1, H3C2, HES4, CENPT, POU2F1, CDKN2A, NFYB, FUS, VDR, H2BC4, CDC5L, POU2…	824	1286	18811	1.27813	1	0.909195	0.901781
GO:0005096~GTPase activator activity	21	2.19207	1.58585	0.0259505	RALGAPA1, LRRK2, RGPD6, ARHGEF19, ARAP3, ARHGAP5, RGPD2, RGPD1, ARHGAP12, SYDE2, TBCK, ARHGAP20, RGS2, TBC1D2, SIPA1L1, TBC1D3, RASA1, CHN2, SMCR8, TBC1D12, RAB3GAP1	824	285	18811	1.68213	1	0.909195	0.901781
GO:0060090~binding, bridging	9	0.939457	1.46377	0.0343744	WWC1, MAGI2, AKAP9, WWC3, CAPN3, AKAP6, PSMG2, AXIN2, SEPTIN11	824	86	18811	2.38907	1	1	0.992857
GO:0019900~kinase binding	10	1.04384	1.46056	0.0346286	BARD1, RB1, MYOM1, PER1, PER3, WWC1, WWC3, SNAI1, HTT, EMP2	824	102	18811	2.23813	1	1	0.992857
GO:0005516~calmodulin binding	16	1.67015	1.44233	0.0361134	DDX5, UNC13A, UBR4, ADD3, TJP1, AKAP12, ATP5IF1, EEA1, MYO1E, MYH2, RGS2, CALD1, MBP, MYH10, SPTAN1, TRPM4	824	205	18811	1.78177	1	1	0.992857
GO:0046982~protein heterodimerization activity	25	2.6096	1.43343	0.0368613	TENM3, PIK3R2, H2AC16, H2AC17, H2AC11, H2AC13, H3C11, H3C12, ADORA1, H3C2, BARD1, CENPT, NFYB, FZD4, RALGAPA1, H2AC4, H2BC4, BMP6, NR4A2, NR4A1, H2BC15, H2BC10, H2AC21, BHLHE40, ATF3	824	371	18811	1.53833	1	1	0.992857
GO:0003682~chromatin binding	30	3.13152	1.43062	0.0371002	CCNT1, SETD7, YBX1, FOXO1, TTC21B, TPR, EP300, HES1, ZNF445, SKIL, HMGN1, PBRM1, SLC30A9, CBX5, FUS, CBX1, ATRX, NAP1L1, FOS, PHC3, TDRD3, MLH3, ZEB1, NFIA, RARA, RAD17, ERCC6, TSPYL6, MPHOSPH8, ZNF431	824	467	18811	1.46652	1	1	0.992857
GO:0017147~Wnt-protein binding	5	0.521921	1.39372	0.0403908	FZD4, FZD6, FZD8, ROR1, RECK	824	30	18811	3.80481	1	1	0.992857
GO:0015179~L-amino acid transmembrane transporter activity	5	0.521921	1.39372	0.0403908	SLC36A1, SLC7A6, SLC38A1, SLC7A5P2, SLC7A5P1	824	30	18811	3.80481	1	1	0.992857
GO:0005319~lipid transporter activity	5	0.521921	1.34846	0.0448267	ABCA10, ABCA5, ABCA6, ABCA9, APOE	824	31	18811	3.68208	1	1	0.992857
GO:0008233~peptidase activity	10	1.04384	1.26435	0.054406	STAMBPL1, MMP1, MMP3, FGL2, CTSH, CAPN3, AGA, SEC11A, CFAP44, ZMPSTE24	824	111	18811	2.05666	1	1	0.992857
GO:0000976~transcription regulatory region sequence-specific DNA binding	17	1.77453	1.22117	0.0600945	FOXC2, ZFHX3, CCNT1, NFYB, ASH2L, ARID4B, FOS, KLF4, POU2F2, GLIS2, PER1, PER3, DMTF1, BASP1, CRY2, PITX2, ATF3	824	238	18811	1.63063	1	1	0.992857
GO:0017124~SH3 domain binding	11	1.14823	1.20996	0.0616647	WIPF1, DENND1A, RUFY2, LANCL1, SH3BP5, ADAM9, ADAM10, AFAP1, CBLB, FMN1, PTPN12	824	131	18811	1.91693	1	1	0.992857
GO:0001228~transcriptional activator activity, RNA polymerase II transcription regulatory region sequence-specific binding	29	3.02714	1.18634	0.0651121	CSRNP1, FOXC2, ZNF131, FOXO1, GLIS2, ZNF841, ZNF445, ZNF300, KLF10, OSR2, SMAD1, NFYB, CDC5L, FOS, POU2F2, KLF4, MEIS2, NR4A2, NR4A1, ELF1, ZNF91, MAF, DMTF1, NFIA, NFIB, CREBRF, REL, FOSB, ATF3	824	473	18811	1.39966	1	1	0.992857
GO:0043021~ribonucleoprotein complex binding	5	0.521921	1.18598	0.0651655	DDX5, CBX5, MDM2, SRP54, PITX2	824	35	18811	3.26127	1	1	0.992857
GO:0003700~transcription factor activity, sequence-specific DNA binding	33	3.44468	1.17563	0.066737	CSRNP1, FOXC2, FOXE1, PRDM1, FOXO1, NPAS2, PITX2, ZFP37, KLF10, SMAD1, ZFHX3, ZNF382, NFYB, VDR, EBF1, FOS, POU2F2, KLF4, KLF2, ELF1, ZNF91, ZEB1, MAF, DMTF1, NFIA, NFIB, BHLHE40, KLF9, REL, SNAI1, RARA, FOSB, ATF3	824	554	18811	1.35984	1	1	0.992857
GO:0045505~dynein intermediate chain binding	5	0.521921	1.14943	0.0708873	DYNC2H1, DNAH1, DYNLT4, HTT, BICD1	824	36	18811	3.17068	1	1	0.992857
GO:0035198~miRNA binding	5	0.521921	1.14943	0.0708873	ZC3H7A, KCNQ1OT1, HNRNPA2B1, YBX1, NEAT1	824	36	18811	3.17068	1	1	0.992857
GO:0031490~chromatin DNA binding	8	0.835073	1.14888	0.0709782	PER1, FOXC2, ATRX, RARA, EP300, JMJD1C, KLF4, FOXO1	824	83	18811	2.20037	1	1	0.992857
GO:0008022~protein C-terminus binding	15	1.56576	1.13481	0.0733141	DST, LMO7, HSPG2, TJP1, PPP1CC, NPAT, ATXN2, NCL, EFHC1, PTK2B, EP300, CCN2, ERCC6, IFT46, OPTN	824	208	18811	1.64631	1	1	0.992857
GO:0008134~transcription factor binding	15	1.56576	1.12155	0.0755869	RB1, TLE1, CCNT1, CDKN2A, PTPRN, FHL2, FOS, MEIS2, NFIA, STING1, RARA, EP300, FOSB, PITX2, MDFI	824	209	18811	1.63844	1	1	0.992857
GO:0051020~GTPase binding	5	0.521921	1.11432	0.076857	EPRS1, RASA1, PTPRN, YBX1, FNBP1L	824	37	18811	3.08498	1	1	0.992857
GO:0019838~growth factor binding	5	0.521921	1.11432	0.076857	BMPR2, DUSP1, TEK, TGFBR1, ACVR2A	824	37	18811	3.08498	1	1	0.992857
GO:0005125~cytokine activity	14	1.46138	1.10075	0.0792962	TNFSF18, IL32, CSF3, IL1RN, WNT2B, GDF6, BMP6, INHBE, BMP4, IFNE, FAM3C, WNT2, CRLF1, WNT4	824	192	18811	1.66461	1	1	0.992857
GO:0051219~phosphoprotein binding	5	0.521921	1.08056	0.08307	RB1, PITX2, PKD2, MID1, MID2	824	38	18811	3.0038	1	1	0.992857

## Sheet: GO_CC
Table S3: GO enrichemnt analysis of 952 DEGs in hEDS/HSD cells based on the category Cellular Component (CC)
Term	Count	%	log10 (p-value)	p-value	Genes	List Total	Pop Hits	Pop Total	Fold Enrichment	Bonferroni	Benjamini	FDR
cytoskeleton	52	5.42797	7.15454	7.00581e-08	DYRK3, RAPH1, FMN2, CMAHP, FNBP1L, BICD1, SEPTIN11, SYNE1, AKAP12, PPP1CC, BAIAP2L1, BASP1, SGCB, LRRFIP1, SPTAN1, JAK1, CFAP44, DSP, PLEKHG3, SLC30A9, DST, CEP295, SHROOM3, ARAP3, TUBA4A, RHOB, EML4, EVC, AKAP9, IFT46, UTRN, PLEC, MACF1, PLEKHH2, LRP1, STK39, ADD3, UACA, CALD1, TTC21B, EPB41L2, EPB41L3, CTNNA1, PTK2B, DMD, DCLK2, TM9SF2, MYO1E, KRT19, JMY, TRIP11, FERMT2	863	541	20472	2.28011	4.53966e-05	4.53976e-05	4.44168e-05
GO:0005737~cytoplasm	303	31.6284	6.79876	1.58942e-07	GLTP, SLC23A2, IL1RN, ZMYND8, DDX60L, CBLB, ADARB1, FNBP1L, RPL6, IFIT2, RPS6KA6, RASSF2, FBXO3, CPNE2, SRGAP2B, GBP5, STARD4, MBNL2, LIMCH1, TYW3, ARRDC3, RECQL, FRS2, DICER1, HCFC2, EML4, EID3, CYP2U1, TEP1, HECW2, RUFY3, RUFY2, AKAP9, SIK1, TRIM16, BLZF1, OPTN, CES1, MT1E, MACF1, INTU, HSPA4L, DCUN1D1, SNX3, NUAK1, HSPH1, NUAK2, RDH10, RNF217, HLTF, STK38L, SNX9, APOE, CDK17, BARD1, PLK3, NDFI…	863	5570	20472	1.29044	0.000102989	5.14971e-05	5.03845e-05
Golgi apparatus	82	8.5595	5.84704	1.42218e-06	GALNT12, PTPRN, LRRK2, ZMYND8, PKD2, BICD1, SH3RF1, SYNE1, FYCO1, RASSF2, GNPTAB, AP1G2, TMEM43, FAM3C, SLC30A7, DYNC2H1, SRGN, GBP5, MMD, F2R, PAQR3, VPS13A, ADAM10, EMP2, AP3B1, MID1, ZDHHC17, GOLGA8B, RER1, AKAP9, FIBIN, OPTN, BLZF1, B4GALT4, MACF1, TMEM87B, PKDCC, SLC35D1, LRP1, TNKS, PRUNE2, NEDD9, HTT, SGMS2, GIGYF2, FSTL3, ARL17B, ATXN2, CAND1, MGAT5, ST3GAL5, DMD, APOE, CERT1, TRPM4, ATP6…	863	1122	20472	1.73369	0.000921151	0.000307192	0.000300555
GO:0005829~cytosol	289	30.167	5.20888	6.18185e-06	GLTP, RB1, WIPF1, RAPH1, CBLB, ADARB1, FNBP1L, LIPA, RPL6, GLS, IFIT2, RABGEF1, RPS6KA6, RASSF2, BAIAP2L1, MPRIP, FBXO3, CCN2, STARD4, AFAP1, FRS2, DICER1, HCFC2, SRRM1, EML4, DAAM1, RUFY3, RBP1, AKAP9, TRIB3, TRIM16, NGEF, OPTN, CES1, TMEM87B, STXBP3, HSPA4L, DCUN1D1, C1ORF198, PIK3R2, GIGYF2, SNX3, HSPH1, EPB41L2, EPB41L3, RNF217, MAP7, STK38L, SNX9, TRPM4, ATP6V0A1, CARMIL1, STAC, PLK2, LRBA, …	863	5477	20472	1.25171	0.00399784	0.00100146	0.000979823
focal adhesion	38	3.9666	4.60692	2.4722e-05	LRP1, ITGB5, DOCK7, FHL2, TNC, NEDD9, NEXN, PIK3R2, RPL6, AKAP12, PPP1CC, ADGRE5, MPRIP, EPB41L2, CTNNA1, TM4SF20, PTK2B, JAK1, LIMS4, DST, AFAP1, ADAM10, LMO7, PTPN12, HSPG2, RHOB, PTPRA, PEAK1, ARPC3, FAT1, ITGBL1, CD9, ADAM9, TEK, PHLDB2, FERMT2, LIMS2, PLEC	863	424	20472	2.12602	0.0158924	0.0027016	0.00264323
GO:0005634~nucleus	305	31.8372	4.6018	2.50148e-05	RB1, TFRC, CCNH, ZMYND8, ADARB1, SMC6, H2AC16, H2AC17, RPL6, H2AC11, H2AC13, RASSF2, CPNE2, CCNL2, CCNL1, ZNF841, ZNF160, RECQL, EBF1, ZNF10, DICER1, HCFC2, SRRM1, EID3, RBP1, RUFY2, VDAC3, MXRA8, SIK1, TRIB3, TSPYL6, BLZF1, OPTN, ATF3, MT1E, HSPA4L, DCUN1D1, PIK3R2, ZNF22, MEG8, NUAK1, PGBD3, ZNF708, HSPH1, NUAK2, HLTF, H3C2, APOE, CDK17, BARD1, PLK3, ZNF382, PLK2, INTS3, PHC3, MED13L, SETX, ZUP…	863	5930	20472	1.2201	0.0160791	0.0027016	0.00264323
adherens junction	21	2.19207	4.29932	5.01978e-05	SYNM, OXTR, BMPR2, LAMA3, ADAM10, NEXN, SHROOM3, FRS2, LMO7, FMN1, PARD3B, TJP1, CDH6, MYO1E, AHI1, BAIAP2L1, APC, CDH10, CTNNA1, PDLIM5, FERMT2	863	175	20472	2.84663	0.0320056	0.00464688	0.00454649
extracellular exosome	126	13.1524	3.40466	0.000393856	SEMA5A, SLC46A3, IL1RN, TFRC, CD82, H2AC16, H2AC17, H2AC11, COMP, H2AC13, EFEMP1, BAIAP2L1, BASP1, CPNE2, FAM3C, DYNC2H1, SLC38A1, CACNA2D1, H2AC4, ADAM10, DICER1, HSPG2, MID2, TUBA4A, NCL, MXRA8, SMS, VDAC3, ADAM9, UTRN, DDX5, STXBP3, NPR3, LTBP3, ZMPSTE24, SNX3, VTN, ADGRG1, HSPH1, MAN2A1, EPB41L2, IGFBP7, SNX9, APOE, H3C2, MYH10, ATP6V0A1, WNT4, CARMIL1, TMEM132A, CYBRD1, RASSF9, GGCT, BST1, A…	863	2218	20472	1.34759	0.225292	0.0319023	0.0312131
GO:0042995~cell projection	19	1.9833	3.128	0.000744724	SLC12A2, MACF1, TENM3, DST, DENND1A, SLC2A3, PTPN12, PKD2, ZDHHC17, RHOB, TJP1, ODF2L, SMCR8, DMD, UTRN, PDLIM5, CEP43, SPTAN1, KCTD16	863	183	20472	2.46293	0.382923	0.0491896	0.0481268
GO:0016607~nuclear speck	34	3.54906	3.1197	0.000759098	RBM25, DDX5, DYRK3, CTR9, SRP54, JADE1, SMC6, GLIS2, PPP1CC, NUAK2, GRK5, BASP1, CCNL2, CCNL1, SF3B1, ATP6V0A1, BARD1, RBM39, CARMIL1, API5, CDC5L, SRRM1, NR4A2, CACNB4, PRPF18, STK17A, ZNF638, CRY2, LUC7L3, TRIP11, FAM76B, SREK1, SRSF5, CDK13	863	432	20472	1.867	0.388648	0.0491896	0.0481268
cell-cell junction	19	1.9833	2.88726	0.00129641	CLIC4, USP53, FZD4, TRPC4, MAGI2, FRS2, RPGRIP1L, ADD3, PKD2, AHI1, MYH2, VANGL2, SV2A, EPB41L3, FAT1, CTNNA1, TEK, LAT, LIMS2	863	192	20472	2.34748	0.568555	0.0763701	0.0747201
GO:0016020~membrane	137	14.3006	2.72447	0.00188596	GLTP, SEMA5A, SLC46A3, ITPRIP, TFRC, TNC, LOXL3, TMEM131L, RPL6, KIF5B, MAP2K3, GBP5, MAGI2, RECQL, ADAM10, FRS2, DNAJB14, HSPG2, EML4, DAAM1, NCL, RUFY3, VDAC3, ADAM9, UTRN, NGEF, DGKI, MACF1, DDX5, TMEM87B, KCNE3, UBR4, SLC1A3, GIGYF2, ZMPSTE24, ATXN2, MAN2A1, HLTF, STK38L, APOE, H3C2, CERT1, ATP6V0A1, OSBPL9, CD163, API5, LRBA, HELZ, CNOT6, EPRS1, WNK1, ARPC3, PTPRA, REEP3, GOLGB1, FAT1, LAT, …	863	2547	20472	1.27597	0.70573	0.101842	0.0996416
GO:0043025~neuronal cell body	31	3.23591	2.65371	0.00221966	CD40, BMPR2, LRP1, PTPRN, DENND1A, LRRK2, SLC1A3, PTPRF, AKAP12, SV2A, ADORA1, PTK2B, DMD, MBP, APOE, TRPM4, SLC12A2, NQO1, PLK3, SLC38A1, NEGR1, SORT1, ANXA3, ADAM10, TNFRSF1B, SLC6A6, OLFM1, RUFY3, AKAP9, EFHC1, DGKI	863	407	20472	1.80683	0.763058	0.108662	0.106314
clathrin-coated vesicle	10	1.04384	2.62937	0.00234764	SNX3, MYO1E, LRP1, SORT1, DENND1A, VPS41, MALL, ADAM10, SNX9, BTBD8	863	69	20472	3.43796	0.781956	0.108662	0.106314
nucleoplasm	199	20.7724	2.50831	0.00310233	RB1, CCNH, ZMYND8, JMJD1C, CBLB, ADARB1, SMC6, LIPA, RPS6KA6, RASSF2, BAIAP2L1, FBXO3, DPF3, CCNL2, MBNL2, RECQL, HCFC2, SRRM1, EID3, RBP1, TRIB3, BLZF1, OPTN, ATF3, CTR9, DCUN1D1, ZNF22, NUAK1, PGBD3, HSPH1, EPB41L2, HLTF, H3C2, TRPM4, BARD1, PLK3, CARMIL1, ZRANB2, ABCA6, INTS3, PHC3, SETX, ZUP1, FUBP1, CREBRF, ID4, REL, SNAI1, RAD17, CDK13, FERMT2, ATG2B, ZNF131, DENND1A, SETD7, AKR1B1, ASH2L, …	863	3939	20472	1.19844	0.866471	0.134021	0.131125
cell cortex	16	1.67015	2.39807	0.00399883	DST, NEDD9, FMN2, FRY, ADD3, FNBP1L, RHOB, PARD3B, AKAP12, NCL, EPB41L2, PTK2B, CCN2, MYH10, SPTAN1, FERMT2	863	164	20472	2.31433	0.925461	0.149934	0.146695
lipid particle	12	1.25261	2.39164	0.00405846	SPART, DGAT2, PNPLA7, VPS13C, RDH10, LPCAT2, RBP1, VPS13A, LDAF1, RAB3GAP1, CES1, ATG2B	863	103	20472	2.76372	0.928298	0.149934	0.146695
Golgi stack	7	0.730689	2.3804	0.00416484	CLIP3, PLK3, GOLGB1, LPCAT2, AKAP9, SULF1, SULF2	863	37	20472	4.48793	0.933093	0.149934	0.146695
basolateral plasma membrane	20	2.08768	2.23106	0.00587414	DSP, SLC12A2, SLC23A2, SLC38A1, LRP1, TFRC, STXBP3, TRPC4, ABCC5, STK39, PKD2, TJP1, SLC6A6, SLC7A6, ADORA1, MAP7, ADAM9, TEK, SLC12A6, SLC29A1	863	238	20472	1.99344	0.978021	0.200339	0.196011
endoplasmic reticulum	66	6.88935	2.07823	0.00835162	PHTF2, SRPX, LRRK2, SRP54, YBX1, TMEM131L, FMN2, ARHGAP5, LCTL, PCSK6, PKD2, PIK3C2B, IFIT2, UFL1, ADORA1, SERAC1, SLC36A1, SMIM14, STARD4, SLC30A9, DGAT2, PTGIS, ATP11C, DNAJB14, FOS, CYP7B1, PTP4A1, OLFM1, RER1, FIBIN, MXRA7, CES1, CEMIP, INSIG2, YTHDC2, LAMA3, ATP10D, MOSPD2, TMTC3, TMTC2, HTT, ATP10A, HSD17B12, GIGYF2, VTN, ERLEC1, PGRMC2, SV2A, AGA, APOE, MEST, CERT1, LNPK, TRPM4, TRAPPC3, N…	863	1142	20472	1.37097	0.995637	0.270593	0.264746
interstitial matrix	4	0.417537	1.90989	0.0123059	CCDC80, COL14A1, TNC, KAZALD1	863	12	20472	7.9073	0.999672	0.379725	0.371521
actin cytoskeleton	20	2.08768	1.87714	0.0132696	MACF1, CLIC4, DST, WIPF1, ARPC1A, NEXN, AFAP1, FMN2, MYO1E, BAIAP2L1, SIPA1L1, MPRIP, CALD1, ARPC3, PEAK1, CAPZA2, CTNNA1, RARA, STK38L, PDLIM5	863	258	20472	1.83891	0.999826	0.384607	0.376298
GO:0000786~nucleosome	13	1.35699	1.83772	0.0145304	H2AC4, H2BC4, H2AC16, H2AC17, H2AC11, H2AC13, H2BC15, H3C11, H2BC10, H3C12, H2AC21, H3C2, MPHOSPH8	863	139	20472	2.21859	0.999924	0.384607	0.376298
GO:0048471~perinuclear region of cytoplasm	46	4.80167	1.83667	0.0145656	CLIC4, TFRC, YTHDC2, WWC1, AKR1B1, SLC1A3, HTT, AKAP6, FMN2, GDPD5, BICD1, SH3RF1, ATXN2, KIF5B, TLK2, MAP7, PTK2B, DMD, CCN2, RHPN2, CERT1, ATP6V0A1, SLC30A7, UPF2, GBP5, NDFIP2, DGAT2, SORT1, FUS, MAGI2, CDC5L, DICER1, TNFRSF1B, MEIS2, MLPH, APC, STING1, PIK3CA, TAOK1, FAT1, RARA, EXOC6, CEP43, DGKI, OPTN, PLEC	863	763	20472	1.43015	0.999926	0.384607	0.376298
GO:0000781~chromosome, telomeric region	15	1.56576	1.82862	0.0148382	CBX5, SSB, TNKS, ATRX, CBX1, SMC6, CDC73, SETX, PPP1CC, EID3, TEP1, DMC1, HNRNPA2B1, RAD17, LRIF1	863	173	20472	2.05681	0.999938	0.384607	0.376298
GO:1990909~Wnt signalosome	4	0.417537	1.80955	0.0155041	APC, LRRK2, WNT2, RECK	863	13	20472	7.29905	0.99996	0.385264	0.37694
GO:0030027~lamellipodium	16	1.67015	1.79445	0.0160527	CARMIL1, PLEKHH2, RAPH1, NEDD9, ARAP3, PKD2, SH3RF1, APC, PIK3CA, ARPC3, RUFY3, FAT1, CTNNA1, PTK2B, DMD, MYH10	863	192	20472	1.97683	0.999972	0.385264	0.37694
GO:1990531~Lem3p-Dnf1p complex	4	0.417537	1.7184	0.0191251	ATP8B1, ATP10D, ATP11C, ATP10A	863	14	20472	6.77769	0.999996	0.429779	0.420494
GO:0009925~basal plasma membrane	7	0.730689	1.70613	0.0196729	SLC12A2, SLC23A2, BMPR2, DST, SLC1A3, TEK, PKD2	863	51	20472	3.25595	0.999997	0.429779	0.420494
GO:0031410~cytoplasmic vesicle	23	2.40084	1.70121	0.0198972	SLC30A7, GBP5, SLC30A9, STARD4, DST, TFRC, SORT1, WIPF1, DENND1A, LRRK2, SLC1A3, EMP2, FNBP1L, PKD2, PRSS12, BICD1, RHOB, TBC1D2, TP53INP1, MALL, JMY, SNX9, APPL1	863	325	20472	1.67878	0.999998	0.429779	0.420494
GO:0043235~receptor complex	17	1.77453	1.66562	0.0215964	RAMP2, BMPR2, LRP1, ITGB5, PTPRQ, VDR, TRPC1, TGFBR1, ACVR2A, GPRC5A, PTPRA, OLR1, ROR1, TEK, GPRC5C, CRLF1, KCTD16	863	217	20472	1.8584	0.999999	0.451434	0.44168
GO:0032991~macromolecular complex	42	4.38413	1.64894	0.022442	WWC1, NPR3, LENG8, HTT, METTL21A, GIGYF2, ZMPSTE24, ATP5IF1, COMP, UFL1, PPP1CC, RASSF2, HSPH1, BTBD1, H3C11, H3C12, CAPN3, HES1, EPS8L2, DMD, MBP, H3C2, SKIL, RBM39, SMAD1, CBX5, CDKN2A, NCOA3, MAGI2, ZNF10, PARD3B, NR4A2, TJP1, MYH2, WNK1, RARA, MDM2, CD9, LY6G5B, UTRN, DGKI, RAB3GAP1	863	703	20472	1.41724	1	0.45445	0.444631
GO:0034451~centriolar satellite	11	1.14823	1.58619	0.0259305	RBM39, ODF2L, TAF1D, KIF5B, SASS6, DDHD2, CEP162, TEK, LRIF1, FNIP2, MID1	863	117	20472	2.23026	1	0.500154	0.489348
GO:0031012~extracellular matrix	19	1.9833	1.58099	0.0262427	POSTN, SPON1, TNXB, COL14A1, LAMC3, MMP1, MMP3, HSD17B12, HAPLN3, THSD4, ADAMTSL1, COMP, VCAN, EFEMP1, LOX, SERAC1, CCN2, APOE, WNT4	863	259	20472	1.74022	1	0.500154	0.489348
GO:0030056~hemidesmosome	3	0.313152	1.49081	0.0322992	DST, LAMA3, PLEC	863	7	20472	10.1665	1	0.569957	0.557643
GO:0016010~dystrophin-associated glycoprotein complex	4	0.417537	1.48753	0.0325438	KRT19, SGCB, DMD, UTRN	863	17	20472	5.58162	1	0.569957	0.557643
GO:0098797~plasma membrane protein complex	4	0.417537	1.48753	0.0325438	SLC6A6, EVC, LRP1, HSPG2	863	17	20472	5.58162	1	0.569957	0.557643
GO:0001725~stress fiber	8	0.835073	1.47205	0.0337252	DAAM1, LIMCH1, ROR1, TEK, PDLIM5, MYH10, FERMT2, SEPTIN11	863	73	20472	2.59966	1	0.575103	0.562678
GO:0005814~centriole	13	1.35699	1.43511	0.0367187	INTU, PLK2, CEP295, MAGI2, HTT, NEDD1, AHI1, ODF2L, SASS6, CEP162, CEP170, CEP43, WASHC1	863	159	20472	1.93953	1	0.576742	0.564281
GO:0030054~cell junction	17	1.77453	1.43417	0.0367986	DSP, MACF1, ITGB5, PARD3B, TJP1, CDH6, TBC1D2, NFIA, BASP1, EPB41L2, RUFY3, EPB41L3, CTNNA1, DMD, UTRN, SPTAN1, FERMT2	863	232	20472	1.73824	1	0.576742	0.564281
GO:0005798~Golgi-associated vesicle	4	0.417537	1.4218	0.0378618	AP1G2, LRRK2, VPS41, ADAM10	863	18	20472	5.27153	1	0.576742	0.564281
GO:0043034~costamere	4	0.417537	1.4218	0.0378618	SYNM, KRT19, DMD, PLEC	863	18	20472	5.27153	1	0.576742	0.564281
GO:0005776~autophagosome	8	0.835073	1.41713	0.0382714	FYCO1, SRPX, STING1, TP53INP1, HTT, TBC1D12, WASHC1, OPTN	863	75	20472	2.53034	1	0.576742	0.564281
GO:0016593~Cdc73/Paf1 complex	3	0.313152	1.37798	0.0418811	CTR9, LEO1, CDC73	863	8	20472	8.89571	1	0.616795	0.603469
GO:1990904~ribonucleoprotein complex	13	1.35699	1.36566	0.0430859	DDX5, CBX5, MYEF2, SSB, LRRK2, YBX1, ATXN2, ZFP36, EPRS1, TEP1, NCL, HNRNPA2B1, PABPC1L	863	163	20472	1.89193	1	0.620437	0.607033
GO:0009986~cell surface	37	3.86221	1.34197	0.0455017	SRPX, CLIC4, RAMP2, CD40, BMPR2, INTU, ITGB5, IGSF3, TFRC, SLC1A3, PCSK6, ATP5IF1, DMD, MBP, WNT4, TNFSF18, SORT1, FZD4, TRPC4, FZD6, F2R, ADAM10, EMP2, LMO7, SULF1, TGFBR1, CEACAM19, ACVR2A, SULF2, RER1, RARA, MXRA8, ITGBL1, ADAM9, ROR1, TEK, FERMT2	863	638	20472	1.37572	1	0.634188	0.620487
GO:0030659~cytoplasmic vesicle membrane	11	1.14823	1.33726	0.0459982	SLC12A2, CLIC4, GPRC5A, STING1, FZD6, SH3BP5, HTT, SNX9, FMN2, PKD2, GPRC5C	863	129	20472	2.0228	1	0.634188	0.620487
GO:0030424~axon	23	2.40084	1.27158	0.0535082	SLC38A1, TENM3, BMPR2, DST, ANXA3, LRRK2, DOCK7, ADAM10, NEXN, HTT, PRSS12, BTBD8, SEPTIN11, SETX, OLFM1, RUFY3, MAP7, DMD, RGS7BP, SLC12A6, TNFRSF21, DGKI, PLEC	863	361	20472	1.51137	1	0.719773	0.704222
GO:0000139~Golgi membrane	37	3.86221	1.26418	0.0544273	GALNT12, TMEM87B, CHPF, TNKS, LRRK2, GCNT1, AP1G2, GNPTAB, MAN2A1, MGAT5, ST3GAL5, GCNT4, ERC1, GALNT7, HS3ST3B1, TRAPPC3, GBP5, NDFIP2, ABCA5, CHPF2, ABCA6, C1GALT1, PAQR3, TMEM132A, ADAM10, EMP2, PLEKHA3, ZDHHC17, GOLGA8B, STING1, GOLGB1, LPCAT2, MALL, TRIP11, OPTN, BLZF1, B4GALT4	863	648	20472	1.35449	1	0.719773	0.704222
GO:0005576~extracellular region	105	10.9603	1.23407	0.0583348	CSF3, ADAMDEC1, TFRC, GMFG, TNC, LOXL3, COMP, IL4I1, EFEMP1, C22ORF46, FAM3C, CCN2, IGFBP5, F2R, GTPBP2, HSPG2, TUBA4A, OLFM1, CCDC80, LOX, CEMIP, PKDCC, LTBP3, VTN, ADGRG1, HSPH1, ANKH, ARSI, IGFBP7, APOE, H3C2, WNT2, PLTP, CPA4, WNT4, CD163, CRIM1, GDF6, BMP6, INHBE, BMP4, BST1, LYPD6B, ITGBL1, CDK13, NIT2, CXCL6, WNT2B, CXCL8, TNFAIP6, LAMC3, COL14A1, CXCL1, YBX1, CXCL3, PCSK6, HAPLN3, CXCL5, …	863	2127	20472	1.17104	1	0.755499	0.739176
GO:0005788~endoplasmic reticulum lumen	20	2.08768	1.22577	0.0594605	SPON1, IGFBP5, COL14A1, TMEM132A, TNC, ADAM10, FSTL3, BMP4, ADAMTSL1, ERLEC1, VCAN, TMEM43, CERCAM, MXRA8, ARSI, IGFBP7, APOE, MFGE8, CES1, WNT4	863	306	20472	1.55045	1	0.755499	0.739176
GO:0034703~cation channel complex	3	0.313152	1.19601	0.0636776	TRPC4, TRPC1, PKD2	863	10	20472	7.11657	1	0.774516	0.757782
GO:0032437~cuticular plate	3	0.313152	1.19601	0.0636776	MYO1E, CIB2, SNX9	863	10	20472	7.11657	1	0.774516	0.757782
GO:0005667~transcription factor complex	16	1.67015	1.19015	0.064543	RB1, SMAD1, ZFHX3, TLE1, FOS, KLF4, NPAS2, NR4A2, MED23, NR4A1, REL, ANKRD1, RARA, EP300, PITX2, SKIL	863	231	20472	1.64308	1	0.774516	0.757782
GO:0035371~microtubule plus-end	4	0.417537	1.15201	0.0704675	CLIP3, DST, CLIP4, NCKAP5	863	23	20472	4.12555	1	0.830235	0.812298
GO:0016324~apical plasma membrane	23	2.40084	1.1401	0.0724261	SLC22A4, SLC12A2, SLC23A2, OXTR, BMPR2, STXBP3, ATP8B1, ABCC5, FZD6, STK39, SHROOM3, CYBRD1, LMO7, EMP2, PARD3B, TJP1, SLC6A6, MUC1, VANGL2, FAT1, CD9, TEK, SLC29A1	863	374	20472	1.45883	1	0.838074	0.819967
GO:0005801~cis-Golgi network	7	0.730689	1.1304	0.0740625	GOLGA8B, MAN2A1, GOLGB1, AKAP9, TRIP11, CCN2, BLZF1	863	70	20472	2.37219	1	0.841974	0.823783
GO:0000228~nuclear chromosome	6	0.626305	1.11824	0.0761661	SETX, PBRM1, H3C11, ATRX, H3C12, H3C2	863	54	20472	2.63577	1	0.850959	0.832574
GO:0042383~sarcolemma	9	0.939457	1.10427	0.0786559	SYNM, KRT19, STAC, SGCB, AHNAK2, CIB2, DMD, UTRN, PLEC	863	106	20472	2.01412	1	0.860776	0.842179
GO:0030425~dendrite	27	2.81837	1.09727	0.0799339	BMPR2, LRP1, KCNE3, DENND1A, LRRK2, HTT, SV2A, ADORA1, PTK2B, APOE, NQO1, PLK3, NEGR1, SORT1, FZD4, ANXA3, PLK2, MAGI2, ADAM10, DICER1, PRSS12, GNAO1, SLC6A6, MLPH, RUFY3, RARA, PLEC	863	460	20472	1.39237	1	0.860776	0.842179
GO:1904724~tertiary granule lumen	6	0.626305	1.09136	0.0810298	TNFAIP6, CTSH, CXCL1, SPTAN1, NIT2, CTSS	863	55	20472	2.58784	1	0.860776	0.842179
GO:0035097~histone methyltransferase complex	4	0.417537	1.06496	0.0861071	CBX5, KMT2C, ASH2L, HCFC2	863	25	20472	3.7955	1	0.899959	0.880515
GO:0019898~extrinsic component of membrane	7	0.730689	1.03977	0.0912485	BST1, OSR1, VPS13C, TPR, STK39, VPS13A, ATG2B	863	74	20472	2.24396	1	0.938556	0.918278
GO:0036064~ciliary basal body	12	1.25261	1.00725	0.0983434	NEDD1, AHI1, ODF2L, EVC, INTU, DAAM1, JADE1, NEDD9, RPGRIP1L, ERC1, IFT46, PKD2	863	168	20472	1.69442	1	0.986463	0.965151
