# Supplementary material for: RNA-Seq of Dermal Fibroblasts from Patients with Hypermobile Ehlers–Danlos Syndrome and Hypermobility Spectrum Disorders Supports Their Categorization as a Single Entity with Involvement of Extracellular Matrix Degrading and Proinflammatory Pathomechanisms
Source: Cells. 2022 Dec 14;11(24):4040. doi: 10.3390/cells11244040 (PMC9777098; doi:10.3390/cells11244040)
Supplement: Supplementary file 1 [file cells-11-04040-s001.zip › Supplementary materials/Table S4.xlsx]

## Sheet: Down DEGs GO_BP
Table S4. GO enrichment analysis for the 826 downregulated DEGs based on the category Biological Process
Category	Term	Count	%	log10(p-value)	PValue	Genes	List Total	Pop Hits	Pop Total	Fold Enrichment	Bonferroni	Benjamini	FDR
GOTERM_BP_DIRECT	GO:0045944~positive regulation of transcription from RNA polymerase II promoter	73	8.77404	4.32643	4.71598e-05	RB1, CSRNP1, ZNF131, BMPR2, CCNT1, ARID4B, ASH2L, YBX1, PKD2, DPF3, EP300, PITX2, ZNF841, ZNF445, KLF10, OSR2, SS18, SLC30A9, NCOA3, OSR1, ATRX, LMO7, AP3B1, FOS, ELF1, ZNF91, ZEB1, MAF, DMTF1, NCL, RARA, ATF3, FOXC2, TNKS, KMT2C, PIK3R2, FOXO1, FSTL3, GLIS2, NPAT, HLTF, HES1, SF3B1, WNT2, ZNF300, SMAD1, ZFHX3, POU2F1, CDKN2A, NFYB, PCGF5, CDC5L, KLF4, MEIS2, BMP6, ACVR2A, KLF2, BMP4, SETX, NR4A2…	720	1201	19256	1.6256	0.146584	0.115167	0.115065
GOTERM_BP_DIRECT	GO:0006468~protein phosphorylation	38	4.56731	4.16411	6.85316e-05	DYRK3, BMPR2, CCNT1, LRRK2, STK39, CSF2RB, RABGEF1, NUAK1, GRK5, STK38, TLK2, PTK2B, STK38L, MAP4K5, FNIP2, JAK1, CDK17, PLK3, SMAD1, MAP3K1, RIOK3, PLK2, NEK7, PAQR3, ADAM10, CLK4, TGFBR1, ACVR2A, PTPRA, PEAK1, WNK1, STK17A, TAOK1, RARA, NEK10, SIK1, BIRC6, CDK13	720	501	19256	2.02852	0.205738	0.115167	0.115065
GOTERM_BP_DIRECT	GO:0016477~cell migration	24	2.88462	3.71275	0.000193755	CARMIL1, FOXE1, ITGB5, LAMA3, USP45, NTN4, NEDD9, PTPRF, RHOB, PIK3C2B, SYDE2, VTN, APC, PIK3CA, PEAK1, RHOJ, WWC3, FAT1, SNAI1, CTNNA1, ITGBL1, ADAM9, HES1, CCN2	720	268	19256	2.39502	0.478618	0.170742	0.17059
GOTERM_BP_DIRECT	GO:0007229~integrin-mediated signaling pathway	14	1.68269	3.63275	0.000232943	ITGB5, DST, LAMA3, NEDD9, ADAM10, PTPRA, CTNNA1, PTK2B, ITGBL1, ADAM9, CCN2, LAT, FERMT2, LIMS2	720	110	19256	3.40384	0.542973	0.170742	0.17059
GOTERM_BP_DIRECT	GO:0000122~negative regulation of transcription from RNA polymerase II promoter	59	7.09135	3.59516	0.000254005	RB1, ZNF131, BTG2, FOXE1, FHL2, ARID4B, YBX1, N4BP2L2, CDC73, ZFP36, ZNF529, WWC3, ANKRD1, EP300, LRRFIP1, PITX2, ZFP37, AASS, KLF10, OSR2, OSR1, ZNF10, DICER1, HCFC2, ZEB1, MAF, CRY2, RARA, ATF3, ZNF431, FOXC2, DDX5, CTR9, FOXO1, GLIS2, TPR, HES1, FNIP2, SKIL, PLK3, ZFHX3, CBX5, CBX1, KLF4, MEIS2, BMP6, KLF2, BMP4, NR4A2, PER1, PER3, NFIB, BHLHE40, HNRNPA2B1, CREBRF, ID4, SNAI1, MDM2, FOSB	720	967	19256	1.63177	0.574214	0.170742	0.17059
GOTERM_BP_DIRECT	GO:0007049~cell cycle	28	3.36538	3.31974	0.000478921	RB1, DYRK3, CCNT1, CCNH, NEDD9, CDC73, PPP1CC, RGS2, RASSF2, EPB41L2, TLK2, EP300, RIOK2, APPL1, CENPT, CDKN2A, DUSP1, CDC5L, USP17L2, PARD3B, PTP4A1, NEDD1, DMTF1, SASS6, RAD17, SIK1, BIRC6, AVPI1	720	359	19256	2.08592	0.80012	0.248835	0.248613
GOTERM_BP_DIRECT	GO:0035264~multicellular organism growth	12	1.44231	3.28546	0.000518251	COMP, CLIC4, PKDCC, ATRX, RARA, EP300, ADARB1, ERCC6, GIGYF2, KLF2, PLEC, ZMPSTE24	720	90	19256	3.56593	0.824882	0.248835	0.248613
GOTERM_BP_DIRECT	GO:0060021~palate development	10	1.20192	3.13099	0.000739625	OSR2, CSRNP1, FRAS1, PKDCC, INTU, INSIG2, OSR1, SNAI1, CPLANE1, TGFBR1	720	66	19256	4.05219	0.916824	0.310735	0.310458
GOTERM_BP_DIRECT	GO:0030501~positive regulation of bone mineralization	8	0.961538	3.00854	0.000980538	BMP4, OSR2, BMPR2, PKDCC, OSR1, ACVR2A, BMP6, WNT4	720	43	19256	4.97571	0.963014	0.366176	0.36585
GOTERM_BP_DIRECT	GO:0030509~BMP signaling pathway	11	1.32212	2.79126	0.0016171	SPART, BMP4, COMP, SMAD1, DDX5, BMPR2, PDCD4, HES1, GDF6, ACVR2A, BMP6	720	88	19256	3.34306	0.995658	0.476399	0.475974
GOTERM_BP_DIRECT	GO:0006974~cellular response to DNA damage stimulus	22	2.64423	2.76957	0.00169993	PLK3, BTG2, CBX5, UBE2B, INTS3, CBX1, SETD7, ASH2L, FMN2, SMC6, FOXO1, SETX, UFL1, NUAK1, APC, ZMAT3, TAOK1, TLK2, RAD17, POLK, MACROD2, CUL4B	720	276	19256	2.1318	0.996715	0.476399	0.475974
GOTERM_BP_DIRECT	GO:0035556~intracellular signal transduction	31	3.72596	2.76932	0.00170092	TFRC, LRRK2, STK39, CBLB, FMN2, NUAK1, DEPTOR, CHN2, STK38, TLK2, SH3BP5, STK38L, CCN2, MAP4K5, STK32B, JAK1, SS18, UNC13A, IGFBP5, DUSP1, DCLK2, TGFBR1, KCTD9, WNK1, STK17A, TAOK1, RASA1, SIK1, DGKI, LAT, RAB40AL	720	450	19256	1.8424	0.996726	0.476399	0.475974
GOTERM_BP_DIRECT	GO:0006355~regulation of transcription, DNA-templated	56	6.73077	2.70807	0.00195851	RB1, ZMYND8, SETD7, JADE1, JMJD1C, ARID4B, YBX1, RPL6, EFEMP1, ZNF529, ZNF84, WWC3, ZNF766, ERC1, LRRFIP1, PITX2, ZNF841, ZNF445, ZFP37, TLE1, ZNF480, ZNF160, ATRX, ZNF10, HCFC2, TGFBR1, PHF20L1, MED23, ZNF91, DMTF1, LRIF1, ZNF432, VGLL3, ZNF431, ZNF195, KMT2C, CTR9, GLIS2, NSD3, ZNF708, TAF1D, TP53INP1, HES1, DMD, ZNF300, HES4, SMAD1, ZFHX3, ZNF382, NFYB, FUS, MEIS2, NFIA, FUBP1, GOLGB1, BHLHE40	720	985	19256	1.5205	0.998625	0.506351	0.505899
GOTERM_BP_DIRECT	GO:0045444~fat cell differentiation	10	1.20192	2.64926	0.00224254	NR4A2, CLIP3, C1QTNF3, NR4A1, GRK5, ID4, EP300, KLF4, GDF6, FOXO1	720	77	19256	3.4733	0.999472	0.538369	0.537889
GOTERM_BP_DIRECT	GO:1990869~cellular response to chemokine	5	0.600962	2.50724	0.00310998	SLC12A2, LOX, DUSP1, WNK1, STK39	720	17	19256	7.86601	0.999972	0.56724	0.566733
GOTERM_BP_DIRECT	GO:0006357~regulation of transcription from RNA polymerase II promoter	87	10.4567	2.48491	0.00327411	RB1, CSRNP1, ZNF131, FOXE1, CCNT1, CCNH, JADE1, JMJD1C, ARID4B, ZNF529, ZNF84, ANKRD1, DPF3, CCNL2, LRRFIP1, CCNL1, PITX2, ZNF841, ZNF445, ZFP37, HMGN1, KLF10, OSR2, SS18, ZNF121, PBRM1, ZNF480, OSR1, ZNF160, EBF1, ZNF10, FOS, HCFC2, POU5F2, PHF20L1, MED23, ELF1, ZNF91, ZEB1, MAF, DMTF1, SLTM, SCAND2P, ZNF432, ATF3, KDM7A, VGLL3, FOXC2, ZNF670, DDX5, ZNF195, FOXO1, ZBTB41, FSTL3, GLIS2, ZNF708, T…	720	1721	19256	1.35199	0.999984	0.56724	0.566733
GOTERM_BP_DIRECT	GO:0002062~chondrocyte differentiation	8	0.961538	2.46843	0.00340073	RB1, BMP4, OSR2, WNT2B, NFIB, OSR1, CCN2, LTBP3	720	53	19256	4.0369	0.999989	0.56724	0.566733
GOTERM_BP_DIRECT	GO:0060070~canonical Wnt signaling pathway	11	1.32212	2.44357	0.00360108	NR4A2, WNT2B, FZD4, LRRK2, FZD6, FZD8, KLF4, WNT2, RECK, FOXO1, WNT4	720	98	19256	3.00193	0.999995	0.56724	0.566733
GOTERM_BP_DIRECT	GO:0007155~cell adhesion	35	4.20673	2.44208	0.00361344	SEMA5A, TNXB, ITGB5, LAMA3, NEDD9, NEXN, ARHGAP5, HAPLN3, PTPRF, ADAMTSL1, COMP, CDH6, VTN, NUAK1, ADGRE5, CTNNA1, HES1, IGFBP7, CCN2, MYH10, POSTN, DST, PCDHB13, RHOB, PARD3B, VCAN, APC, CERCAM, FAT1, MXRA8, ITGBL1, CD9, ADAM9, MFGE8, FERMT2	720	557	19256	1.68053	0.999995	0.56724	0.566733
GOTERM_BP_DIRECT	GO:0030335~positive regulation of cell migration	20	2.40385	2.44044	0.00362708	SEMA5A, CARMIL1, SEMA4A, CEMIP, SEMA3C, FZD4, F2R, NEDD9, ADAM10, TGFBR1, TJP1, PTP4A1, APC, RUFY3, MGAT5, SNAI1, PTK2B, ADAM9, CEP43, FERMT2	720	256	19256	2.08941	0.999995	0.56724	0.566733
GOTERM_BP_DIRECT	GO:0015807~L-amino acid transport	4	0.480769	2.43434	0.00367842	SLC7A6, SLC38A1, SLC7A5P2, SLC7A5P1	720	9	19256	11.8864	0.999996	0.56724	0.566733
GOTERM_BP_DIRECT	GO:0030282~bone mineralization	8	0.961538	2.42204	0.00378404	KLF10, COMP, PKDCC, ANKH, LOX, LTBP3, AXIN2, ZMPSTE24	720	54	19256	3.96214	0.999997	0.56724	0.566733
GOTERM_BP_DIRECT	GO:0045638~negative regulation of myeloid cell differentiation	5	0.600962	2.41097	0.00388173	CTR9, LEO1, PTK2B, MEIS2, CDC73	720	18	19256	7.42901	0.999998	0.56724	0.566733
GOTERM_BP_DIRECT	GO:0001580~detection of chemical stimulus involved in sensory perception of bitter taste	7	0.841346	2.35419	0.00442393	TAS2R50, TAS2R30, TAS2R20, TAS2R13, TAS2R46, TAS2R14, TAS2R19	720	42	19256	4.45741	1	0.600323	0.599787
GOTERM_BP_DIRECT	GO:0043153~entrainment of circadian clock by photoperiod	6	0.721154	2.32825	0.00469622	PER1, PPP1CC, PER3, CRY2, BHLHE40, SIK1	720	30	19256	5.34889	1	0.600323	0.599787
GOTERM_BP_DIRECT	GO:0000902~cell morphogenesis	10	1.20192	2.32268	0.0047569	CDH6, SS18, CDH10, SHROOM3, AP3B1, FRY, LIPA, CERT1, KLF2, PLEC	720	86	19256	3.10982	1	0.600323	0.599787
GOTERM_BP_DIRECT	GO:0046907~intracellular transport	7	0.841346	2.30257	0.00498231	RGPD6, AP3B1, RASSF9, HPS5, FMN2, RGPD2, RGPD1	720	43	19256	4.35375	1	0.600323	0.599787
GOTERM_BP_DIRECT	GO:0043066~negative regulation of apoptotic process	33	3.96635	2.30093	0.0050012	DYRK3, TFRC, FHL2, FMN2, FOXO1, CDC73, SH3RF1, COMP, UFL1, GRK5, PTK2B, CAPN3, ERC1, TNFSF18, PLK3, UBE2B, API5, DUSP1, OSR1, PLK2, ADAM10, TGFBR1, BMP4, SETX, TJP1, AHI1, RASA1, MDM2, PDCD4, BIRC6, PSMG2, TEK, LIMS2	720	526	19256	1.67788	1	0.600323	0.599787
GOTERM_BP_DIRECT	GO:0006607~NLS-bearing protein import into nucleus	5	0.600962	2.2371	0.00579293	RGPD6, CBLB, KPNA5, RGPD2, RGPD1	720	20	19256	6.68611	1	0.671381	0.670781
GOTERM_BP_DIRECT	GO:0035115~embryonic forelimb morphogenesis	6	0.721154	2.20468	0.00624194	OSR2, OSR1, RDH10, RPGRIP1L, RECK, LNPK	720	32	19256	5.01458	1	0.676806	0.676202
GOTERM_BP_DIRECT	GO:0030199~collagen fibril organization	8	0.961538	2.16672	0.00681208	COMP, FOXC2, TNXB, TNXA, LOX, PTPRQ, COL14A1, TGFBR1	720	60	19256	3.56593	1	0.676806	0.676202
GOTERM_BP_DIRECT	GO:0016055~Wnt signaling pathway	16	1.92308	2.16086	0.00690469	MACF1, TLE1, WNT2B, FZD4, TNKS, CTR9, TMEM131L, AXIN2, PKD2, CDC73, APC, GRK5, LEO1, WNT2, FERMT2, WNT4	720	196	19256	2.18322	1	0.676806	0.676202
GOTERM_BP_DIRECT	GO:0045104~intermediate filament cytoskeleton organization	5	0.600962	2.15815	0.00694778	DSP, MACF1, SYNM, DST, PLEC	720	21	19256	6.36772	1	0.676806	0.676202
GOTERM_BP_DIRECT	GO:0009267~cellular response to starvation	9	1.08173	2.1349	0.00732986	KLF10, BMPR2, WNT2B, LRRK2, VPS41, JMY, FOXO1, PIK3C2B, WNT4	720	76	19256	3.16711	1	0.676806	0.676202
GOTERM_BP_DIRECT	GO:0001889~liver development	10	1.20192	2.13165	0.00738507	UPF2, PIK3CA, MAN2A1, RARA, HES1, AK4, RPGRIP1L, PKD2, WNT4, ZMPSTE24	720	92	19256	2.907	1	0.676806	0.676202
GOTERM_BP_DIRECT	GO:1904761~negative regulation of myofibroblast differentiation	3	0.360577	2.09991	0.007945	RB1, TP53INP1, PDCD4	720	4	19256	20.0583	1	0.676806	0.676202
GOTERM_BP_DIRECT	GO:0071464~cellular response to hydrostatic pressure	3	0.360577	2.09991	0.007945	PIK3CA, PKD2, PLEC	720	4	19256	20.0583	1	0.676806	0.676202
GOTERM_BP_DIRECT	GO:0051726~regulation of cell cycle	22	2.64423	2.09143	0.00810159	RB1, CDK17, ZFHX3, CDKN2A, DUSP1, MAGI2, JADE1, ADAM10, ADARB1, PKD2, TGFBR1, APC, GRK5, TP53INP1, JMY, MDM2, DMD, CCNL2, SRSF5, CDK13, CCNL1, SKIL	720	316	19256	1.86195	1	0.676806	0.676202
GOTERM_BP_DIRECT	GO:0030500~regulation of bone mineralization	5	0.600962	2.08381	0.00824501	COMP, ANKH, PTK2B, SGMS2, ZMPSTE24	720	22	19256	6.07828	1	0.676806	0.676202
GOTERM_BP_DIRECT	GO:0010976~positive regulation of neuron projection development	12	1.44231	2.06962	0.00851875	SNX3, SETX, RGS2, TENM3, NEGR1, FBXO38, MAGI2, ANKRD1, EP300, PTK2B, ROR1, DMD	720	128	19256	2.50729	1	0.676806	0.676202
GOTERM_BP_DIRECT	GO:0000165~MAPK cascade	12	1.44231	2.06962	0.00851875	MAP2K3, SETX, SMAD1, PPP1CC, ZFP36, MAP3K1, LRRK2, TAOK1, PTK2B, MBP, USP17L2, MAP4K5	720	128	19256	2.50729	1	0.676806	0.676202
GOTERM_BP_DIRECT	GO:0008104~protein localization	13	1.5625	2.06155	0.0086787	LRBA, LRRK2, VPS13A, AXIN2, SEPTIN11, MLH3, PARD3B, AHI1, HEATR5A, ID4, CTNNA1, DMD, PLEC	720	146	19256	2.38135	1	0.676806	0.676202
GOTERM_BP_DIRECT	GO:1902475~L-alpha-amino acid transmembrane transport	4	0.480769	2.05255	0.00886031	SLC7A6, SLC38A1, SLC7A5P2, SLC7A5P1	720	12	19256	8.91481	1	0.676806	0.676202
GOTERM_BP_DIRECT	GO:0048251~elastic fiber assembly	4	0.480769	2.05255	0.00886031	TNXB, LOX, LTBP3, THSD4	720	12	19256	8.91481	1	0.676806	0.676202
GOTERM_BP_DIRECT	GO:0001657~ureteric bud development	6	0.721154	1.98539	0.0103421	BMP4, SMAD1, FOXC2, OSR1, RARA, CRLF1	720	36	19256	4.45741	1	0.772441	0.771751
GOTERM_BP_DIRECT	GO:0043547~positive regulation of GTPase activity	15	1.80288	1.95367	0.0111258	RALGAPA1, DOCK9, DENND1A, DOCK7, F2R, USP17L2, DOCK11, TBC1D2, RASA1, CHN2, SNX9, SMCR8, FERMT2, RAB3GAP1, WNT4	720	188	19256	2.13387	1	0.807539	0.806818
GOTERM_BP_DIRECT	GO:0070542~response to fatty acid	5	0.600962	1.94721	0.0112926	FABP3, INSIG2, MBP, CCN2, FOXO1	720	24	19256	5.57176	1	0.807539	0.806818
GOTERM_BP_DIRECT	GO:0060173~limb development	6	0.721154	1.93556	0.0115995	COMP, BMPR2, INTU, RARA, FERMT2, LNPK	720	37	19256	4.33694	1	0.812206	0.811481
GOTERM_BP_DIRECT	GO:0050714~positive regulation of protein secretion	7	0.841346	1.90117	0.0125555	MYOM1, SEC24A, ANKRD1, ADAM9, MYH10, BMP6, EXPH5	720	52	19256	3.60021	1	0.861206	0.860437
GOTERM_BP_DIRECT	GO:2000653~regulation of genetic imprinting	3	0.360577	1.88891	0.012915	PIK3CA, CTR9, ZNF445	720	5	19256	16.0467	1	0.868147	0.867372
GOTERM_BP_DIRECT	GO:0001822~kidney development	11	1.32212	1.86348	0.0136938	DYNC2H1, BMP4, C1GALT1, CPLANE1, RPGRIP1L, SULF1, TGFBR1, BMP6, FSTL3, SULF2, WNT4	720	119	19256	2.47218	1	0.902448	0.901643
GOTERM_BP_DIRECT	GO:0030336~negative regulation of cell migration	14	1.68269	1.84243	0.0143738	CLIC4, IGFBP5, LIMCH1, ZMYND8, MAGI2, NEDD9, ARID4B, ADARB1, SULF1, RHOB, TP53INP1, RECK, SRGAP2B, WNT4	720	175	19256	2.13956	1	0.929046	0.928217
GOTERM_BP_DIRECT	GO:0071498~cellular response to fluid shear stress	4	0.480769	1.7731	0.0168617	PTK2B, PKD2, KLF2, PLEC	720	15	19256	7.13185	1	0.992342	0.991456
GOTERM_BP_DIRECT	GO:0034332~adherens junction organization	5	0.600962	1.76749	0.0170808	DSP, CDH6, CDH10, ADAM10, PLEC	720	27	19256	4.95267	1	0.992342	0.991456
GOTERM_BP_DIRECT	GO:0051493~regulation of cytoskeleton organization	5	0.600962	1.76749	0.0170808	TJP1, CLIC4, TAOK1, AFAP1, NEXN	720	27	19256	4.95267	1	0.992342	0.991456
GOTERM_BP_DIRECT	GO:0006869~lipid transport	9	1.08173	1.74309	0.018068	OSBPL9, ABCA10, ABCA5, ABCA6, VPS13C, ABCA9, VPS13A, CERT1, GULP1	720	89	19256	2.70449	1	0.992342	0.991456
GOTERM_BP_DIRECT	GO:0018105~peptidyl-serine phosphorylation	14	1.68269	1.73237	0.0185195	DYRK3, TNKS, PLK2, LRRK2, NEK7, STK39, DCLK2, TGFBR1, RPS6KA6, WNK1, STK38, TLK2, STK38L, STK32B	720	181	19256	2.06863	1	0.992342	0.991456
GOTERM_BP_DIRECT	GO:0006366~transcription from RNA polymerase II promoter	17	2.04327	1.72772	0.018719	RB1, SMAD1, CCNT1, CCNH, ATRX, ARID4B, FOS, KLF4, NR4A2, BMP4, NR4A1, MAF, TRIP11, EP300, FOSB, ERCC6, PAXBP1	720	240	19256	1.8944	1	0.992342	0.991456
GOTERM_BP_DIRECT	GO:0001649~osteoblast differentiation	11	1.32212	1.72685	0.0187563	BMP4, UFL1, VCAN, BMPR2, IGFBP5, LOX, FHL2, SNAI1, ID4, AXIN2, BMP6	720	125	19256	2.35351	1	0.992342	0.991456
GOTERM_BP_DIRECT	GO:0001711~endodermal cell fate commitment	3	0.360577	1.72363	0.0188961	CTR9, LEO1, CDC73	720	6	19256	13.3722	1	0.992342	0.991456
GOTERM_BP_DIRECT	GO:0061299~retina vasculature morphogenesis in camera-type eye	3	0.360577	1.72363	0.0188961	CLIC4, FZD4, RHOJ	720	6	19256	13.3722	1	0.992342	0.991456
GOTERM_BP_DIRECT	GO:0033088~negative regulation of immature T cell proliferation in thymus	3	0.360577	1.72363	0.0188961	BMP4, CDKN2A, TMEM131L	720	6	19256	13.3722	1	0.992342	0.991456
GOTERM_BP_DIRECT	GO:0031581~hemidesmosome assembly	3	0.360577	1.72363	0.0188961	DST, LAMA3, PLEC	720	6	19256	13.3722	1	0.992342	0.991456
GOTERM_BP_DIRECT	GO:0003417~growth plate cartilage development	3	0.360577	1.72363	0.0188961	COMP, RARA, ZMPSTE24	720	6	19256	13.3722	1	0.992342	0.991456
GOTERM_BP_DIRECT	GO:2000134~negative regulation of G1/S transition of mitotic cell cycle	7	0.841346	1.68369	0.0207164	RB1, CACNB4, APC, JADE1, KLF4, PKD2, CDC73	720	58	19256	3.22778	1	1	0.999405
GOTERM_BP_DIRECT	GO:0030198~extracellular matrix organization	13	1.5625	1.67453	0.0211576	POSTN, TNXB, TNXA, COL14A1, HSD17B12, KAZALD1, THSD4, ADAMTSL1, VTN, CCDC80, ST7, SERAC1, RECK	720	165	19256	2.10714	1	1	0.999405
GOTERM_BP_DIRECT	GO:0090630~activation of GTPase activity	11	1.32212	1.66256	0.021749	SYDE2, TBCK, TBC1D2, SIPA1L1, TBC1D3, RALGAPA1, DOCK7, NEDD9, PTK2B, TBC1D12, NGEF	720	128	19256	2.29835	1	1	0.999405
GOTERM_BP_DIRECT	GO:0045892~negative regulation of transcription, DNA-templated	33	3.96635	1.62844	0.0235267	RB1, FOXE1, ZMYND8, SUMO4, FOXO1, GLIS2, NPAT, ANKRD1, DPF3, CAPN3, HES1, WNT4, KLF10, POU2F1, CBX5, TLE1, CDKN2A, ATP8B1, CBX1, KLF4, PHC3, BMP4, PER1, ZNF91, ZEB1, CRY2, BHLHE40, ID4, RARA, MDM2, PDCD4, MPHOSPH8, LHX9	720	590	19256	1.49588	1	1	0.999405
GOTERM_BP_DIRECT	GO:0030502~negative regulation of bone mineralization	4	0.480769	1.62257	0.023847	SRGN, PTK2B, LTBP3, TRPM4	720	17	19256	6.29281	1	1	0.999405
GOTERM_BP_DIRECT	GO:0061709~reticulophagy	4	0.480769	1.62257	0.023847	UFL1, STING1, SNX30, ATG2B	720	17	19256	6.29281	1	1	0.999405
GOTERM_BP_DIRECT	GO:0043116~negative regulation of vascular permeability	4	0.480769	1.62257	0.023847	AKAP12, TJP1, DDAH1, FERMT2	720	17	19256	6.29281	1	1	0.999405
GOTERM_BP_DIRECT	GO:0032870~cellular response to hormone stimulus	5	0.600962	1.61196	0.0244367	DUSP1, NCOA3, FOSB, IGFBP7, FOS	720	30	19256	4.45741	1	1	0.999405
GOTERM_BP_DIRECT	GO:0050909~sensory perception of taste	5	0.600962	1.61196	0.0244367	TAS2R30, TAS2R20, TAS2R13, TAS2R46, TAS2R19	720	30	19256	4.45741	1	1	0.999405
GOTERM_BP_DIRECT	GO:0001938~positive regulation of endothelial cell proliferation	8	0.961538	1.60645	0.0247488	BMP4, SEMA5A, NR4A1, BMPR2, TEK, WNT2, TGFBR1, BMP6	720	77	19256	2.77864	1	1	0.999405
GOTERM_BP_DIRECT	GO:0030155~regulation of cell adhesion	7	0.841346	1.5867	0.0259001	VTN, NUAK1, TNXB, TNXA, LAMA3, PTK2B, LMO7	720	61	19256	3.06903	1	1	0.999405
GOTERM_BP_DIRECT	GO:0051216~cartilage development	7	0.841346	1.5867	0.0259001	SMAD1, ZEB1, EVC, TRIP11, SULF1, BMP6, SULF2	720	61	19256	3.06903	1	1	0.999405
GOTERM_BP_DIRECT	GO:0051281~positive regulation of release of sequestered calcium ion into cytosol	5	0.600962	1.5646	0.0272524	CEMIP, TRPC1, F2R, CAPN3, AKAP6	720	31	19256	4.31362	1	1	0.999405
GOTERM_BP_DIRECT	GO:0016570~histone modification	4	0.480769	1.55533	0.02784	UFL1, CTR9, JADE1, CDC73	720	18	19256	5.94321	1	1	0.999405
GOTERM_BP_DIRECT	GO:0002063~chondrocyte development	4	0.480769	1.55533	0.02784	COMP, BMPR2, SULF1, SULF2	720	18	19256	5.94321	1	1	0.999405
GOTERM_BP_DIRECT	GO:0045860~positive regulation of protein kinase activity	7	0.841346	1.52584	0.0297961	MAP2K3, RASSF2, LRRK2, PTK2B, SNX9, AXIN2, LAT	720	63	19256	2.9716	1	1	0.999405
GOTERM_BP_DIRECT	GO:0045893~positive regulation of transcription, DNA-templated	38	4.56731	1.52131	0.0301088	FOXC2, FOXE1, SETD7, JADE1, FOXO1, GLIS2, NSD3, NPAT, TP53INP1, ANKRD1, EP300, CAPN3, WNT4, MAP2K3, OSR2, ZFHX3, FZD4, CDKN2A, FUS, F2R, FOS, HCFC2, KLF4, GDF6, TGFBR1, TDRD3, MID2, KLF2, BMP4, CNOT6, ELF1, NFIB, JMY, REL, SNAI1, RARA, TRIP11, KDM7A	720	716	19256	1.4194	1	1	0.999405
GOTERM_BP_DIRECT	GO:0001501~skeletal system development	11	1.32212	1.50302	0.0314034	COMP, VCAN, PKDCC, EVC, RASSF2, ANKH, NPR3, HAPLN3, PAPSS2, TGFBR1, BMP6	720	136	19256	2.16315	1	1	0.999405
GOTERM_BP_DIRECT	GO:0034613~cellular protein localization	7	0.841346	1.49648	0.0318805	AHI1, LRRK2, CTNNA1, DMD, AXIN2, SEPTIN11, PLEC	720	64	19256	2.92517	1	1	0.999405
GOTERM_BP_DIRECT	GO:0060391~positive regulation of SMAD protein import into nucleus	4	0.480769	1.49262	0.032165	BMP4, BMPR2, TGFBR1, BMP6	720	19	19256	5.63041	1	1	0.999405
GOTERM_BP_DIRECT	GO:0045721~negative regulation of gluconeogenesis	4	0.480769	1.49262	0.032165	C1QTNF3, EP300, SIK1, FAM3C	720	19	19256	5.63041	1	1	0.999405
GOTERM_BP_DIRECT	GO:0003094~glomerular filtration	4	0.480769	1.49262	0.032165	MYO1E, RHPN2, SULF1, SULF2	720	19	19256	5.63041	1	1	0.999405
GOTERM_BP_DIRECT	GO:0035914~skeletal muscle cell differentiation	6	0.721154	1.48581	0.0326728	RB1, NR4A1, BTG2, ANKRD1, FOS, ATF3	720	48	19256	3.34306	1	1	0.999405
GOTERM_BP_DIRECT	GO:0051591~response to cAMP	6	0.721154	1.48581	0.0326728	PER1, DUSP1, FOSB, PTK2B, FOS, TEK	720	48	19256	3.34306	1	1	0.999405
GOTERM_BP_DIRECT	GO:0006915~apoptotic process	33	3.96635	1.48212	0.0329516	CSRNP1, PRUNE2, JADE1, HTT, MRPS30, FOXO1, COMP, DPP8, GRK5, ZMAT3, TP53INP1, PTK2B, EP300, CAPN3, SRGN, PLK3, UBE2B, CDKN2A, API5, USP17L2, SULF1, GDF6, TGFBR1, RHOB, GULP1, NR4A1, SLTM, STK17A, MDM2, PDCD4, TNFRSF25, BIRC6, BLID	720	607	19256	1.45398	1	1	0.999405
GOTERM_BP_DIRECT	GO:0044344~cellular response to fibroblast growth factor stimulus	5	0.600962	1.4757	0.0334427	SETX, NR4A1, ZFP36, POSTN, CDC5L	720	33	19256	4.05219	1	1	0.999405
GOTERM_BP_DIRECT	GO:0003281~ventricular septum development	5	0.600962	1.4757	0.0334427	MDM2, TRIP11, HES1, FRS2, CPLANE1	720	33	19256	4.05219	1	1	0.999405
GOTERM_BP_DIRECT	GO:0007517~muscle organ development	9	1.08173	1.47487	0.0335062	ZFHX3, EVC, BTBD1, SGCB, CAPN3, DPF3, DMD, PAXBP1, UTRN	720	100	19256	2.407	1	1	0.999405
GOTERM_BP_DIRECT	GO:1902389~ceramide 1-phosphate transport	3	0.360577	1.47408	0.0335675	GLTP, PLEKHA3, CERT1	720	8	19256	10.0292	1	1	0.999405
GOTERM_BP_DIRECT	GO:0007179~transforming growth factor beta receptor signaling pathway	9	1.08173	1.45285	0.0352495	SMAD1, ITGB5, ADAM9, FOS, LTBP3, SKIL, FERMT2, TGFBR1, APPL1	720	101	19256	2.38317	1	1	0.999405
GOTERM_BP_DIRECT	GO:0010718~positive regulation of epithelial to mesenchymal transition	6	0.721154	1.45211	0.0353094	BMP4, OLFM1, SNAI1, AXIN2, FERMT2, TGFBR1	720	49	19256	3.27483	1	1	0.999405
GOTERM_BP_DIRECT	GO:0017148~negative regulation of translation	8	0.961538	1.45112	0.0353896	BTG2, RGS2, IGFBP5, EPRS1, NCL, RARA, YBX1, GIGYF2	720	83	19256	2.57778	1	1	0.999405
GOTERM_BP_DIRECT	GO:0035994~response to muscle stretch	4	0.480769	1.43393	0.0368189	PIK3CA, ANKRD1, DMD, FOS	720	20	19256	5.34889	1	1	0.999405
GOTERM_BP_DIRECT	GO:0042476~odontogenesis	5	0.600962	1.43392	0.0368199	BMP4, OSR2, OSR1, AXIN2, PITX2	720	34	19256	3.93301	1	1	0.999405
GOTERM_BP_DIRECT	GO:0010862~positive regulation of pathway-restricted SMAD protein phosphorylation	6	0.721154	1.41937	0.0380737	BMP4, BMPR2, GDF6, TGFBR1, ACVR2A, BMP6	720	50	19256	3.20933	1	1	0.999405
GOTERM_BP_DIRECT	GO:0000281~mitotic cytokinesis	7	0.841346	1.41236	0.0386941	APC, RASA1, EFHC1, SNX9, EXOC6, MYH10, RHOB	720	67	19256	2.7942	1	1	0.999405
GOTERM_BP_DIRECT	GO:0031648~protein destabilization	6	0.721154	1.38757	0.0409667	CDKN2A, MDM2, EP300, HTT, CAPN3, CDC73	720	51	19256	3.14641	1	1	0.999405
GOTERM_BP_DIRECT	GO:0010595~positive regulation of endothelial cell migration	7	0.841346	1.38557	0.0411556	BMP4, FOXC2, BMPR2, ANXA3, PTK2B, TEK, RHOB	720	68	19256	2.7531	1	1	0.999405
GOTERM_BP_DIRECT	GO:0032924~activin receptor signaling pathway	4	0.480769	1.37885	0.0417975	BMPR2, GDF6, TGFBR1, ACVR2A	720	21	19256	5.09418	1	1	0.999405
GOTERM_BP_DIRECT	GO:0061001~regulation of dendritic spine morphogenesis	4	0.480769	1.37885	0.0417975	SIPA1L1, LRRK2, ADAM10, PDLIM5	720	21	19256	5.09418	1	1	0.999405
GOTERM_BP_DIRECT	GO:0061072~iris morphogenesis	3	0.360577	1.37564	0.0421073	WNT2B, PITX2, WNT2	720	9	19256	8.91481	1	1	0.999405
GOTERM_BP_DIRECT	GO:0072015~glomerular visceral epithelial cell development	3	0.360577	1.37564	0.0421073	BMP4, MYO1E, MAGI2	720	9	19256	8.91481	1	1	0.999405
GOTERM_BP_DIRECT	GO:0033523~histone H2B ubiquitination	3	0.360577	1.37564	0.0421073	CTR9, LEO1, CDC73	720	9	19256	8.91481	1	1	0.999405
GOTERM_BP_DIRECT	GO:0060993~kidney morphogenesis	3	0.360577	1.37564	0.0421073	GCNT1, GCNT4, ZMPSTE24	720	9	19256	8.91481	1	1	0.999405
GOTERM_BP_DIRECT	GO:0032526~response to retinoic acid	6	0.721154	1.35665	0.0439892	TFRC, DUSP1, RARA, IGFBP7, KLF4, BMP6	720	52	19256	3.0859	1	1	0.999405
GOTERM_BP_DIRECT	GO:0051017~actin filament bundle assembly	5	0.600962	1.35515	0.0441417	BAIAP2L1, CALD1, NEDD9, PLS3, DMD	720	36	19256	3.71451	1	1	0.999405
GOTERM_BP_DIRECT	GO:0003333~amino acid transmembrane transport	5	0.600962	1.35515	0.0441417	SLC36A1, SLC7A6, SLC38A1, SLC7A5P2, SLC7A5P1	720	36	19256	3.71451	1	1	0.999405
GOTERM_BP_DIRECT	GO:0007623~circadian rhythm	7	0.841346	1.33377	0.0463692	SETX, KLF10, PER1, CRY2, BHLHE40, KLF9, EP300	720	70	19256	2.67444	1	1	0.999405
GOTERM_BP_DIRECT	GO:0006977~DNA damage response, signal transduction by p53 class mediator resulting in cell cycle arrest	4	0.480769	1.32702	0.0470952	PLK3, MUC1, PLK2, MDM2	720	22	19256	4.86263	1	1	0.999405
GOTERM_BP_DIRECT	GO:2001237~negative regulation of extrinsic apoptotic signaling pathway	5	0.600962	1.31798	0.0480862	BMP4, HTT, BIRC6, TGFBR1, SH3RF1	720	37	19256	3.61411	1	1	0.999405
GOTERM_BP_DIRECT	GO:0006897~endocytosis	14	1.68269	1.31106	0.0488579	LRP1, SORT1, DENND1A, LRRK2, FNBP1L, PRSS12, EEA1, MYO1E, RABGEF1, VTN, HEATR5A, RHOJ, OLR1, SNX9	720	208	19256	1.80011	1	1	0.999405
GOTERM_BP_DIRECT	GO:0009791~post-embryonic development	7	0.841346	1.30872	0.0491227	NR4A2, BMP4, CSRNP1, SZT2, SEMA3C, TGFBR1, GIGYF2	720	71	19256	2.63678	1	1	0.999405
GOTERM_BP_DIRECT	GO:0006469~negative regulation of protein kinase activity	7	0.841346	1.30872	0.0491227	RB1, DBNDD2, DEPTOR, CDKN2A, SMCR8, CEP43, PLEC	720	71	19256	2.63678	1	1	0.999405
GOTERM_BP_DIRECT	GO:0032922~circadian regulation of gene expression	7	0.841346	1.30872	0.0491227	PER1, PPP1CC, ZFHX3, PER3, CRY2, BHLHE40, ID4	720	71	19256	2.63678	1	1	0.999405
GOTERM_BP_DIRECT	GO:0060272~embryonic skeletal joint morphogenesis	3	0.360577	1.2894	0.0513566	BMP4, OSR2, OSR1	720	10	19256	8.02333	1	1	0.999405
GOTERM_BP_DIRECT	GO:0032836~glomerular basement membrane development	3	0.360577	1.2894	0.0513566	MYO1E, SULF1, SULF2	720	10	19256	8.02333	1	1	0.999405
GOTERM_BP_DIRECT	GO:0097084~vascular smooth muscle cell development	3	0.360577	1.2894	0.0513566	COMP, SGCB, HES1	720	10	19256	8.02333	1	1	0.999405
GOTERM_BP_DIRECT	GO:2000650~negative regulation of sodium ion transmembrane transporter activity	3	0.360577	1.2894	0.0513566	HECW2, OSR1, STK39	720	10	19256	8.02333	1	1	0.999405
GOTERM_BP_DIRECT	GO:0061626~pharyngeal arch artery morphogenesis	3	0.360577	1.2894	0.0513566	BMP4, BMPR2, HES1	720	10	19256	8.02333	1	1	0.999405
GOTERM_BP_DIRECT	GO:0048703~embryonic viscerocranium morphogenesis	3	0.360577	1.2894	0.0513566	FOXC2, MTHFD1L, RDH10	720	10	19256	8.02333	1	1	0.999405
GOTERM_BP_DIRECT	GO:0090263~positive regulation of canonical Wnt signaling pathway	9	1.08173	1.28885	0.0514224	SEMA5A, UBE2B, TNKS, WNK1, TTC21B, LRRK2, RECK, SULF2, TRPM4	720	109	19256	2.20826	1	1	0.999405
GOTERM_BP_DIRECT	GO:0001525~angiogenesis	16	1.92308	1.28165	0.0522817	SEMA4A, CLIC4, C1GALT1, FZD8, HSPG2, RHOB, ATP5IF1, PIK3CA, CALD1, NCL, RHOJ, PTK2B, TEK, CCN2, SLC12A6, MFGE8	720	252	19256	1.69806	1	1	0.999405
GOTERM_BP_DIRECT	GO:0043087~regulation of GTPase activity	8	0.961538	1.26971	0.0537396	SIPA1L1, CHN2, PLXNA2, CBLB, RAB3GAP1, DGKI, NGEF, ARHGAP12	720	91	19256	2.35116	1	1	0.999405
GOTERM_BP_DIRECT	GO:0042733~embryonic digit morphogenesis	6	0.721154	1.2689	0.0538389	BMP4, OSR2, INTU, OSR1, CPLANE1, LNPK	720	55	19256	2.91758	1	1	0.999405
GOTERM_BP_DIRECT	GO:0051496~positive regulation of stress fiber assembly	6	0.721154	1.2689	0.0538389	CARMIL1, LIMCH1, CCN2, FERMT2, TGFBR1, WNT4	720	55	19256	2.91758	1	1	0.999405
GOTERM_BP_DIRECT	GO:0071277~cellular response to calcium ion	8	0.961538	1.24885	0.0563838	CLIC4, SYT12, WNK1, FUS, FOSB, CAPN3, FOS, PKD2	720	92	19256	2.3256	1	1	0.999405
GOTERM_BP_DIRECT	GO:0030177~positive regulation of Wnt signaling pathway	5	0.600962	1.24765	0.0565393	MACF1, FZD4, SULF1, CDC73, SULF2	720	39	19256	3.42877	1	1	0.999405
GOTERM_BP_DIRECT	GO:0046854~phosphatidylinositol phosphorylation	6	0.721154	1.24121	0.0573837	PIK3CA, PIK3R2, TTC7A, FAM126B, FAM126A, PIK3C2B	720	56	19256	2.86548	1	1	0.999405
GOTERM_BP_DIRECT	GO:0071300~cellular response to retinoic acid	7	0.841346	1.23675	0.0579758	SETX, FZD4, OSR1, RARA, PTK2B, KLF4, WNT2	720	74	19256	2.52988	1	1	0.999405
GOTERM_BP_DIRECT	GO:0032331~negative regulation of chondrocyte differentiation	4	0.480769	1.23194	0.058622	BMP4, EFEMP1, LTBP3, TGFBR1	720	24	19256	4.45741	1	1	0.999405
GOTERM_BP_DIRECT	GO:0048844~artery morphogenesis	4	0.480769	1.23194	0.058622	COMP, FOXC2, HES1, TGFBR1	720	24	19256	4.45741	1	1	0.999405
GOTERM_BP_DIRECT	GO:0065003~macromolecular complex assembly	11	1.32212	1.22905	0.0590136	APC, EPRS1, WIPF1, CAPZA2, MDM2, PTK2B, CAPN3, HES1, SNX9, DMD, DNAJB14	720	152	19256	1.93545	1	1	0.999405
GOTERM_BP_DIRECT	GO:0007030~Golgi organization	10	1.20192	1.22727	0.0592558	DYNC2H1, GOLGA8B, ATP8B1, GOLGB1, LRRK2, HTT, TRIP11, BLZF1, OPTN, SYNE1	720	132	19256	2.02609	1	1	0.999405
GOTERM_BP_DIRECT	GO:0045595~regulation of cell differentiation	5	0.600962	1.21435	0.0610453	TNXB, APC, ST7, SIK1, KLF4	720	40	19256	3.34306	1	1	0.999405
GOTERM_BP_DIRECT	GO:0048286~lung alveolus development	5	0.600962	1.21435	0.0610453	BMP4, BMPR2, PKDCC, IGFBP5, MAN2A1	720	40	19256	3.34306	1	1	0.999405
GOTERM_BP_DIRECT	GO:0010508~positive regulation of autophagy	7	0.841346	1.21378	0.0611254	UFL1, PLK2, LRRK2, TP53INP1, MID2, FOXO1, OPTN	720	75	19256	2.49615	1	1	0.999405
GOTERM_BP_DIRECT	GO:0010506~regulation of autophagy	7	0.841346	1.21378	0.0611254	MFSD8, LRRK2, TP53INP1, EP300, PIK3R2, SMCR8, ZMPSTE24	720	75	19256	2.49615	1	1	0.999405
GOTERM_BP_DIRECT	GO:0034058~endosomal vesicle fusion	3	0.360577	1.21289	0.0612507	SAMD9, VPS41, VPS8	720	11	19256	7.29394	1	1	0.999405
GOTERM_BP_DIRECT	GO:0034115~negative regulation of heterotypic cell-cell adhesion	3	0.360577	1.21289	0.0612507	WNK1, MBP, KLF4	720	11	19256	7.29394	1	1	0.999405
GOTERM_BP_DIRECT	GO:0001823~mesonephros development	3	0.360577	1.21289	0.0612507	BMP4, OSR2, OSR1	720	11	19256	7.29394	1	1	0.999405
GOTERM_BP_DIRECT	GO:0050658~RNA transport	3	0.360577	1.21289	0.0612507	ATXN2, HNRNPA2B1, YBX1	720	11	19256	7.29394	1	1	0.999405
GOTERM_BP_DIRECT	GO:0008284~positive regulation of cell proliferation	29	3.48558	1.20699	0.0620889	ASH2L, HAPLN3, UFL1, GRK5, PTK2B, HES1, DMD, CCN2, WNT2, TRPM4, OSR2, SS18, F2R, ADAM10, NAP1L1, MEIS2, TGFBR1, BMP6, BMP4, TJP1, BST1, CNOT6, RARA, MDM2, BIRC6, CDK13, CEP43, ATF3, CRLF1	720	549	19256	1.41273	1	1	0.999405
GOTERM_BP_DIRECT	GO:0008285~negative regulation of cell proliferation	25	3.00481	1.19541	0.0637667	BTG2, ADARB1, PKD2, CDC73, TP53INP1, PTK2B, IGFBP7, KLF10, SMAD1, PBRM1, CDKN2A, DUSP1, MAGI2, F2R, AXIN2, KLF4, BMP4, FABP3, CACNB4, ZEB1, APC, DDAH1, PMP22, RARA, CD9	720	459	19256	1.45667	1	1	0.999405
GOTERM_BP_DIRECT	GO:0000226~microtubule cytoskeleton organization	10	1.20192	1.19433	0.0639242	EML4, SS18, DST, TAOK1, DOCK7, DCLK2, PHLDB2, MID1, CFAP44, PARD3B	720	134	19256	1.99585	1	1	0.999405
GOTERM_BP_DIRECT	GO:0051893~regulation of focal adhesion assembly	4	0.480769	1.18819	0.0648357	MACF1, LIMCH1, PTPRA, PEAK1	720	25	19256	4.27911	1	1	0.999405
GOTERM_BP_DIRECT	GO:0009966~regulation of signal transduction	6	0.721154	1.18799	0.0648652	GRK5, VEPH1, AFAP1, IGFBP7, CDK13, KAZALD1	720	58	19256	2.76667	1	1	0.999405
GOTERM_BP_DIRECT	GO:0008360~regulation of cell shape	11	1.32212	1.18351	0.0655378	SEMA4A, RASA1, RHOJ, PLXNA2, SHROOM3, PTK2B, ATP10A, MYH10, FERMT2, RHOB, ZMPSTE24	720	155	19256	1.89799	1	1	0.999405
GOTERM_BP_DIRECT	GO:0016266~O-glycan processing	5	0.600962	1.1822	0.0657355	GALNT7, GALNT12, C1GALT1, GCNT1, GCNT4	720	41	19256	3.26152	1	1	0.999405
GOTERM_BP_DIRECT	GO:0032868~response to insulin	7	0.841346	1.16926	0.0677232	FABP3, STXBP3, SORT1, INSIG2, VPS13C, CRY2, GCNT1	720	77	19256	2.43131	1	1	0.999405
GOTERM_BP_DIRECT	GO:0045669~positive regulation of osteoblast differentiation	7	0.841346	1.16926	0.0677232	BMP4, SMAD1, BMPR2, FERMT2, ACVR2A, BMP6, WNT4	720	77	19256	2.43131	1	1	0.999405
GOTERM_BP_DIRECT	GO:0032092~positive regulation of protein binding	7	0.841346	1.16926	0.0677232	BMP4, VTN, LRP1, STING1, PLK2, LRRK2, EP300	720	77	19256	2.43131	1	1	0.999405
GOTERM_BP_DIRECT	GO:0043065~positive regulation of apoptotic process	19	2.28365	1.16548	0.068315	CDKN2A, DUSP1, ADAM10, HTT, FOXO1, TGFBR1, RHOB, IFIT2, BMP4, CLIP3, OLFM1, NR4A1, RASSF2, APC, ZMAT3, STK17A, TP53INP1, JMY, ANKRD1	720	328	19256	1.54922	1	1	0.999405
GOTERM_BP_DIRECT	GO:0090316~positive regulation of intracellular protein transport	4	0.480769	1.14668	0.0713383	PLK3, RUFY3, KIF5B, TPR	720	26	19256	4.11453	1	1	0.999405
GOTERM_BP_DIRECT	GO:0045332~phospholipid translocation	4	0.480769	1.14668	0.0713383	ATP8B1, ATP10D, ATP11C, ATP10A	720	26	19256	4.11453	1	1	0.999405
GOTERM_BP_DIRECT	GO:0030431~sleep	3	0.360577	1.14431	0.0717288	OXTR, FOS, SLC29A1	720	12	19256	6.68611	1	1	0.999405
GOTERM_BP_DIRECT	GO:0010390~histone monoubiquitination	3	0.360577	1.14431	0.0717288	CTR9, LEO1, CDC73	720	12	19256	6.68611	1	1	0.999405
GOTERM_BP_DIRECT	GO:0035627~ceramide transport	3	0.360577	1.14431	0.0717288	GLTP, PLEKHA3, CERT1	720	12	19256	6.68611	1	1	0.999405
GOTERM_BP_DIRECT	GO:0032330~regulation of chondrocyte differentiation	3	0.360577	1.14431	0.0717288	MAF, CCN2, LNPK	720	12	19256	6.68611	1	1	0.999405
GOTERM_BP_DIRECT	GO:0030644~cellular chloride ion homeostasis	3	0.360577	1.14431	0.0717288	SLC12A2, WNK1, STK39	720	12	19256	6.68611	1	1	0.999405
GOTERM_BP_DIRECT	GO:0008286~insulin receptor signaling pathway	6	0.721154	1.13747	0.0728661	FOXC2, APC, PTPRA, PIK3R2, FOXO1, APPL1	720	60	19256	2.67444	1	1	0.999405
GOTERM_BP_DIRECT	GO:0014846~esophagus smooth muscle contraction	2	0.240385	1.13498	0.0732857	SULF1, SULF2	720	2	19256	26.7444	1	1	0.999405
GOTERM_BP_DIRECT	GO:1905289~regulation of CAMKK-AMPK signaling cascade	2	0.240385	1.13498	0.0732857	LRRK2, HTT	720	2	19256	26.7444	1	1	0.999405
GOTERM_BP_DIRECT	GO:0072208~metanephric smooth muscle tissue development	2	0.240385	1.13498	0.0732857	OSR1, PKD2	720	2	19256	26.7444	1	1	0.999405
GOTERM_BP_DIRECT	GO:0060857~establishment of glial blood-brain barrier	2	0.240385	1.13498	0.0732857	MXRA8, DMD	720	2	19256	26.7444	1	1	0.999405
GOTERM_BP_DIRECT	GO:0034059~response to anoxia	2	0.240385	1.13498	0.0732857	OXTR, CCN2	720	2	19256	26.7444	1	1	0.999405
GOTERM_BP_DIRECT	GO:1905408~negative regulation of creatine transmembrane transporter activity	2	0.240385	1.13498	0.0732857	OSR1, STK39	720	2	19256	26.7444	1	1	0.999405
GOTERM_BP_DIRECT	GO:1904908~negative regulation of maintenance of mitotic sister chromatid cohesion, telomeric	2	0.240385	1.13498	0.0732857	TNKS, ATRX	720	2	19256	26.7444	1	1	0.999405
GOTERM_BP_DIRECT	GO:0010628~positive regulation of gene expression	27	3.24519	1.12973	0.0741774	MYOM1, TFRC, FTX, PKD2, TTC21B, KCNQ1OT1, TP53INP1, HES1, CCN2, OSR2, SMAD1, TLE1, CDKN2A, OSR1, KLF4, TGFBR1, BMP6, BMP4, MED23, OLFM1, MAF, FUBP1, ID4, RARA, MDM2, ERCC6, ATF3	720	513	19256	1.4076	1	1	0.999405
GOTERM_BP_DIRECT	GO:1904754~positive regulation of vascular associated smooth muscle cell migration	4	0.480769	1.10724	0.0781205	IGFBP5, LRP1, DOCK7, MDM2	720	27	19256	3.96214	1	1	0.999405
GOTERM_BP_DIRECT	GO:0030036~actin cytoskeleton organization	12	1.44231	1.09836	0.0797335	TBCK, DIAPH3, TNXB, DAAM1, PIK3CA, RHOJ, ARPC1A, CAPZA2, DMD, PDLIM5, UTRN, SPTAN1	720	182	19256	1.76337	1	1	0.999405
GOTERM_BP_DIRECT	GO:0001756~somitogenesis	5	0.600962	1.09212	0.0808877	FOXC2, SEMA3C, PLXNA2, EP300, AXIN2	720	44	19256	3.03914	1	1	0.999405
GOTERM_BP_DIRECT	GO:0002088~lens development in camera-type eye	5	0.600962	1.09212	0.0808877	CRYGS, WNT2B, FAT1, WNT2, TGFBR1	720	44	19256	3.03914	1	1	0.999405
GOTERM_BP_DIRECT	GO:0016485~protein processing	7	0.841346	1.08561	0.0821092	SRGN, DYNC2H1, COMP, ADAM9, ADAM10, PCSK6, METAP2	720	81	19256	2.31125	1	1	0.999405
GOTERM_BP_DIRECT	GO:0032436~positive regulation of proteasomal ubiquitin-dependent protein catabolic process	7	0.841346	1.08561	0.0821092	ANKIB1, PLK2, LRRK2, RNF217, MDM2, AXIN2, SH3RF1	720	81	19256	2.31125	1	1	0.999405
GOTERM_BP_DIRECT	GO:0090136~epithelial cell-cell adhesion	3	0.360577	1.08232	0.0827336	DSP, ITGB5, CTNNA1	720	13	19256	6.17179	1	1	0.999405
GOTERM_BP_DIRECT	GO:2000343~positive regulation of chemokine (C-X-C motif) ligand 2 production	3	0.360577	1.08232	0.0827336	POSTN, LRP1, MBP	720	13	19256	6.17179	1	1	0.999405
GOTERM_BP_DIRECT	GO:0035116~embryonic hindlimb morphogenesis	4	0.480769	1.0697	0.0851725	BMP4, OSR2, OSR1, RPGRIP1L	720	28	19256	3.82063	1	1	0.999405
GOTERM_BP_DIRECT	GO:0051894~positive regulation of focal adhesion assembly	4	0.480769	1.0697	0.0851725	FMN1, TEK, FERMT2, WNT4	720	28	19256	3.82063	1	1	0.999405
GOTERM_BP_DIRECT	GO:0007368~determination of left/right symmetry	6	0.721154	1.06638	0.0858271	DYNC2H1, RPGRIP1L, PCSK6, PITX2, PKD2, ACVR2A	720	63	19256	2.54709	1	1	0.999405
GOTERM_BP_DIRECT	GO:0043407~negative regulation of MAP kinase activity	5	0.600962	1.06404	0.0862898	BMP4, RGS2, DUSP1, STK38, PAQR3	720	45	19256	2.9716	1	1	0.999405
GOTERM_BP_DIRECT	GO:1990830~cellular response to leukemia inhibitory factor	8	0.961538	1.05941	0.0872151	CACNB4, TFRC, NFYB, FZD4, NCL, GFPT2, PIGA, KLF4	720	102	19256	2.0976	1	1	0.999405
GOTERM_BP_DIRECT	GO:0060395~SMAD protein signal transduction	6	0.721154	1.04384	0.0903988	BMP4, SMAD1, MAGI2, FOS, GDF6, BMP6	720	64	19256	2.50729	1	1	0.999405
GOTERM_BP_DIRECT	GO:0001656~metanephros development	4	0.480769	1.03393	0.0924842	OSR2, FOXC2, RDH10, GDF6	720	29	19256	3.68889	1	1	0.999405
GOTERM_BP_DIRECT	GO:0032967~positive regulation of collagen biosynthetic process	4	0.480769	1.03393	0.0924842	BMP4, F2R, CCN2, WNT4	720	29	19256	3.68889	1	1	0.999405
GOTERM_BP_DIRECT	GO:1903672~positive regulation of sprouting angiogenesis	4	0.480769	1.03393	0.0924842	TJP1, SMAD1, KLF4, JAK1	720	29	19256	3.68889	1	1	0.999405
GOTERM_BP_DIRECT	GO:0035988~chondrocyte proliferation	3	0.360577	1.0259	0.0942112	COMP, GOLGB1, CCN2	720	14	19256	5.73095	1	1	0.999405
GOTERM_BP_DIRECT	GO:0055119~relaxation of cardiac muscle	3	0.360577	1.0259	0.0942112	RGS2, PIK3CA, PDE5A	720	14	19256	5.73095	1	1	0.999405
GOTERM_BP_DIRECT	GO:0097320~plasma membrane tubulation	3	0.360577	1.0259	0.0942112	CAVIN2, SNX9, FNBP1L	720	14	19256	5.73095	1	1	0.999405
GOTERM_BP_DIRECT	GO:0060317~cardiac epithelial to mesenchymal transition	3	0.360577	1.0259	0.0942112	OLFM1, WNT2, TGFBR1	720	14	19256	5.73095	1	1	0.999405
GOTERM_BP_DIRECT	GO:0043517~positive regulation of DNA damage response, signal transduction by p53 class mediator	3	0.360577	1.0259	0.0942112	DDX5, CDKN2A, ANKRD1	720	14	19256	5.73095	1	1	0.999405
GOTERM_BP_DIRECT	GO:0010738~regulation of protein kinase A signaling	3	0.360577	1.0259	0.0942112	AKAP12, LRRK2, AKAP6	720	14	19256	5.73095	1	1	0.999405
GOTERM_BP_DIRECT	GO:0006855~drug transmembrane transport	3	0.360577	1.0259	0.0942112	ATP8B1, ABCC5, SLC29A1	720	14	19256	5.73095	1	1	0.999405
GOTERM_BP_DIRECT	GO:0006325~chromatin organization	15	1.80288	1.01494	0.0966178	CBX5, KMT2C, CBX1, SETD7, JMJD1C, ASH2L, ARID4B, TDRD3, ZMPSTE24, NSD3, HLTF, TLK2, DPF3, KDM7A, HMGN1	720	254	19256	1.5794	1	1	0.999405
GOTERM_BP_DIRECT	GO:0010942~positive regulation of cell death	5	0.600962	1.01054	0.097602	BMP4, LRP1, APC, CCN2, AXIN2	720	47	19256	2.84515	1	1	0.999405
GOTERM_BP_DIRECT	GO:0016925~protein sumoylation	5	0.600962	1.01054	0.097602	EID3, MDM2, SUMO4, SMC6, TRPM4	720	47	19256	2.84515	1	1	0.999405
GOTERM_BP_DIRECT	GO:0071560~cellular response to transforming growth factor beta stimulus	6	0.721154	1.00039	0.0999108	POSTN, ZEB1, ANKRD1, WNT2, TGFBR1, WNT4	720	66	19256	2.43131	1	1	0.999405

## Sheet: Down DEGs GO_MF
Table S4. GO enrichment analysis for the 826 downregulated DEGs based on the cateogry Molecular Funciton
Category	Term	Count	%	log10 (p-value)	PValue	Genes	List Total	Pop Hits	Pop Total	Fold Enrichment	Bonferroni	Benjamini	FDR
GOTERM_MF_DIRECT	GO:0003779~actin binding	32	3.84615	5.27397	5.32143e-06	MACF1, PLEKHH2, WIPF1, LRRK2, ARPC1A, FMN1, FMN2, SYNE1, BAIAP2L1, CALD1, EPB41L2, STK38L, EPS8L2, DMD, PDLIM5, MYH10, SPTAN1, PLEKHG3, DST, LIMCH1, TNNC2, AFAP1, MYO1E, MYH2, DIAPH3, DAAM1, ARPC3, JMY, CAPZA2, UTRN, FERMT2, PLEC	710	339	18811	2.50094	0.00460836	0.004619	0.00459239
GOTERM_MF_DIRECT	GO:0005524~ATP binding	88	10.5769	4.02298	9.4847e-05	DYRK3, BMPR2, LRRK2, DDX60L, SMC6, PIK3C2B, RPS6KA6, PPIP5K1, PPIP5K2, KIF5B, TLK2, RIOK2, STK32B, JAK1, DYNC2H1, MAP2K3, ABCC5, ATRX, RECQL, ATP11C, DICER1, TGFBR1, MYH2, ABCA10, PIK3CA, SLTM, TEP1, ROR1, SIK1, RAD54L2, DGKI, DDX5, DNAH1, PKDCC, YTHDC2, HSPA4L, ATP10D, STK39, AK4, ATP10A, SPATA5, PAPSS2, GK5, NUAK1, HSPH1, MTHFD1L, GRK5, STK38, HLTF, PTK2B, STK38L, TENT2, MAP4K5, MYH10, TRPM4, C…	710	1544	18811	1.51004	0.079033	0.0411636	0.0409265
GOTERM_MF_DIRECT	GO:0004674~protein serine/threonine kinase activity	31	3.72596	3.69478	0.000201938	DYRK3, BMPR2, LRRK2, STK39, RPS6KA6, NUAK1, GRK5, STK38, TLK2, STK38L, RIOK2, MAP4K5, STK32B, CDK17, MAP2K3, PLK3, MAP3K1, RIOK3, PLK2, NEK7, DCLK2, CLK4, TGFBR1, ACVR2A, PIK3CA, WNK1, STK17A, TAOK1, NEK10, SIK1, CDK13	710	392	18811	2.09522	0.160795	0.0584274	0.0580909
GOTERM_MF_DIRECT	GO:0005515~protein binding	514	61.7788	3.29209	0.000510398	RB1, TFRC, WIPF1, RAPH1, GPATCH4, ADARB1, SMC6, FNBP1L, RPL6, GLS, ATP5IF1, RABGEF1, MPRIP, SAMD12, STARD4, TYW3, ZNF10, FRS2, DICER1, HCFC2, HSPG2, EML4, EID3, DAAM1, TEP1, HECW2, RUFY3, FAR1, TSPYL6, NGEF, ATF3, OPTN, GIGYF2, HSPH1, RDH10, EPB41L2, CDK17, PLK3, NDFIP2, FZD4, PLK2, FZD6, FZD8, PHC3, SETX, FAT1, SNAI1, REL, SASS6, RAD17, LDAF1, PSMG2, CDK13, FERMT2, MYOM1, WDR47, BTG2, SETD7, SRP…	710	12539	18811	1.08606	0.357982	0.0997998	0.0992249
GOTERM_MF_DIRECT	GO:0004672~protein kinase activity	29	3.48558	3.24042	0.000574884	DYRK3, PKDCC, LRRK2, STK39, RPS6KA6, NUAK1, RASSF2, GRK5, STK38L, RIOK2, MAP4K5, STK32B, CDK17, MAP2K3, MAP3K1, NEK7, DCLK2, TGFBR1, TBCK, SLTM, PEAK1, WNK1, STK17A, TAOK1, NEK10, SIK1, ROR1, TEK, CDK13	710	379	18811	2.02727	0.392949	0.0997998	0.0992249
GOTERM_MF_DIRECT	GO:0033038~bitter taste receptor activity	6	0.721154	3.13943	0.000725391	TAS2R50, TAS2R30, TAS2R20, TAS2R13, TAS2R46, TAS2R14	710	20	18811	7.94831	0.467338	0.103314	0.102719
GOTERM_MF_DIRECT	GO:0051015~actin filament binding	20	2.40385	3.04033	0.000911322	MYOM1, MACF1, TNNC2, ARPC1A, NEXN, SHROOM3, ADD3, SYNE1, MYO1E, MYH2, MPRIP, ARPC3, CAPZA2, CTNNA1, PLS3, DMD, UTRN, MYH10, SPTAN1, FERMT2	710	225	18811	2.35505	0.546785	0.103314	0.102719
GOTERM_MF_DIRECT	GO:0045296~cadherin binding	25	3.00481	3.02127	0.000952205	MACF1, BMPR2, DOCK9, FNBP1L, GIGYF2, RPL6, CDH6, MPRIP, CALD1, KIF5B, STK38, CTNNA1, EPS8L2, SNX9, ERC1, LRRFIP1, SPTAN1, TRPC4, TJP1, TBC1D2, DIAPH3, GPRC5A, CDH10, PHLDB2, PLEC	710	316	18811	2.09607	0.5626	0.103314	0.102719
GOTERM_MF_DIRECT	GO:0005178~integrin binding	16	1.92308	2.93851	0.00115209	TNXB, ITGB5, DST, LAMA3, ADAM10, HSPG2, COMP, VTN, CD9, ITGBL1, ADAM9, DMD, CCN2, UTRN, MFGE8, FERMT2	710	161	18811	2.63298	0.632338	0.111113	0.110473
GOTERM_MF_DIRECT	GO:0002039~p53 binding	10	1.20192	2.87111	0.00134553	PLK3, NUAK1, MUC1, TEP1, CDKN2A, SETD7, MDM2, ANKRD1, EP300, HTT	710	71	18811	3.7316	0.689231	0.116792	0.116119
GOTERM_MF_DIRECT	GO:0008307~structural constituent of muscle	7	0.841346	2.28304	0.00521148	MYOM1, SYNM, KRT19, CAPN3, NEXN, DMD, PLEC	710	43	18811	4.31304	0.989277	0.411233	0.408865
GOTERM_MF_DIRECT	GO:0003682~chromatin binding	30	3.60577	2.21561	0.00608676	CCNT1, SETD7, YBX1, FOXO1, TTC21B, TPR, EP300, HES1, ZNF445, SKIL, HMGN1, PBRM1, SLC30A9, CBX5, FUS, CBX1, ATRX, NAP1L1, FOS, PHC3, TDRD3, MLH3, ZEB1, NFIA, RARA, RAD17, ERCC6, TSPYL6, MPHOSPH8, ZNF431	710	467	18811	1.70199	0.995006	0.440275	0.437739
GOTERM_MF_DIRECT	GO:0043621~protein self-association	9	1.08173	2.18052	0.00659898	EML4, KCTD9, TMEM43, VPS41, ELP1, PTK2B, AGA, ACVR2A, PLEC	710	74	18811	3.22229	0.996807	0.440609	0.438071
GOTERM_MF_DIRECT	GO:0017166~vinculin binding	4	0.480769	2.04139	0.00909087	SYNM, CTNNA1, DMD, UTRN	710	12	18811	8.83146	0.999639	0.563634	0.560387
GOTERM_MF_DIRECT	GO:0005520~insulin-like growth factor binding	5	0.600962	1.99969	0.0100072	IGFBP5, CRIM1, IGFBP7, CCN2, KAZALD1	710	23	18811	5.75964	0.999838	0.579083	0.575747
GOTERM_MF_DIRECT	GO:0005516~calmodulin binding	16	1.92308	1.95583	0.0110705	DDX5, UNC13A, UBR4, ADD3, TJP1, AKAP12, ATP5IF1, EEA1, MYO1E, MYH2, RGS2, CALD1, MBP, MYH10, SPTAN1, TRPM4	710	205	18811	2.06785	0.999936	0.600577	0.597118
GOTERM_MF_DIRECT	GO:0031625~ubiquitin protein ligase binding	21	2.52404	1.92134	0.0119856	RB1, UBE2B, FZD4, FZD6, FZD8, AXIN2, SMC6, MID1, FOXO1, SPART, PER1, PER3, APC, STING1, HLTF, MDM2, PTK2B, SNX9, BLZF1, CUL4B, JAK1	710	305	18811	1.8242	0.999972	0.611971	0.608446
GOTERM_MF_DIRECT	GO:0005201~extracellular matrix structural constituent	12	1.44231	1.81251	0.0153989	COMP, VTN, POSTN, FRAS1, EFEMP1, TNXB, COL14A1, LAMA3, FGL2, IGFBP7, MFGE8, THSD4	710	138	18811	2.30386	0.999999	0.742569	0.738292
GOTERM_MF_DIRECT	GO:0019901~protein kinase binding	30	3.60577	1.72691	0.0187537	CCNT1, TFRC, STK39, BICD1, UFL1, PPP1CC, ZFP36, SLC12A6, SLC12A2, MAP2K3, SMAD1, MAP3K1, CDKN2A, LRBA, CDC5L, ADAM10, AXIN2, RHOB, CACNB4, APC, STING1, WNK1, CRY2, SIK1, SMCR8, UTRN, CDK13, CEP43, LAT, FERMT2	710	510	18811	1.55849	1	0.852307	0.847397
GOTERM_MF_DIRECT	GO:0008013~beta-catenin binding	9	1.08173	1.695	0.0201835	NR4A2, APC, TRPC4, CTNNA1, EP300, ASH2L, AXIN2, KLF4, FOXO1	710	90	18811	2.64944	1	0.852307	0.847397
GOTERM_MF_DIRECT	GO:0042813~Wnt-activated receptor activity	4	0.480769	1.68421	0.0206915	FZD4, FZD6, FZD8, ROR1	710	16	18811	6.62359	1	0.852307	0.847397
GOTERM_MF_DIRECT	GO:0001228~transcriptional activator activity, RNA polymerase II transcription regulatory region sequence-specific binding	28	3.36538	1.66433	0.0216608	CSRNP1, FOXC2, ZNF131, FOXO1, GLIS2, ZNF841, ZNF445, ZNF300, KLF10, OSR2, SMAD1, NFYB, CDC5L, FOS, KLF4, MEIS2, NR4A2, NR4A1, ELF1, ZNF91, MAF, DMTF1, NFIA, NFIB, CREBRF, REL, FOSB, ATF3	710	473	18811	1.56838	1	0.852307	0.847397
GOTERM_MF_DIRECT	GO:0005096~GTPase activator activity	19	2.28365	1.63473	0.0231884	RALGAPA1, LRRK2, RGPD6, ARHGAP5, RGPD2, RGPD1, ARHGAP12, SYDE2, TBCK, ARHGAP20, RGS2, TBC1D2, SIPA1L1, TBC1D3, RASA1, CHN2, SMCR8, TBC1D12, RAB3GAP1	710	285	18811	1.76629	1	0.852307	0.847397
GOTERM_MF_DIRECT	GO:0017147~Wnt-protein binding	5	0.600962	1.59884	0.0251859	FZD4, FZD6, FZD8, ROR1, RECK	710	30	18811	4.41573	1	0.852307	0.847397
GOTERM_MF_DIRECT	GO:0015179~L-amino acid transmembrane transporter activity	5	0.600962	1.59884	0.0251859	SLC36A1, SLC7A6, SLC38A1, SLC7A5P2, SLC7A5P1	710	30	18811	4.41573	1	0.852307	0.847397
GOTERM_MF_DIRECT	GO:0008022~protein C-terminus binding	15	1.80288	1.57928	0.0263461	DST, LMO7, HSPG2, TJP1, PPP1CC, NPAT, ATXN2, NCL, EFHC1, PTK2B, EP300, CCN2, ERCC6, IFT46, OPTN	710	208	18811	1.91065	1	0.852307	0.847397
GOTERM_MF_DIRECT	GO:0017124~SH3 domain binding	11	1.32212	1.57656	0.0265119	WIPF1, DENND1A, RUFY2, LANCL1, SH3BP5, ADAM9, ADAM10, AFAP1, CBLB, FMN1, PTPN12	710	131	18811	2.22472	1	0.852307	0.847397
GOTERM_MF_DIRECT	GO:0001968~fibronectin binding	5	0.600962	1.50633	0.031165	CCDC80, IGFBP5, CCN2, HSD17B12, FSTL3	710	32	18811	4.13974	1	0.956313	0.950804
GOTERM_MF_DIRECT	GO:0070063~RNA polymerase binding	4	0.480769	1.48224	0.032943	ZFP36, CCNT1, YTHDC2, ERCC6	710	19	18811	5.57776	1	0.956313	0.950804
GOTERM_MF_DIRECT	GO:1902387~ceramide 1-phosphate binding	3	0.360577	1.46656	0.034154	GLTP, PLEKHA3, CERT1	710	8	18811	9.93539	1	0.956313	0.950804
GOTERM_MF_DIRECT	GO:1902388~ceramide 1-phosphate transporter activity	3	0.360577	1.46656	0.034154	GLTP, PLEKHA3, CERT1	710	8	18811	9.93539	1	0.956313	0.950804
GOTERM_MF_DIRECT	GO:0031490~chromatin DNA binding	8	0.961538	1.43258	0.0369337	PER1, FOXC2, ATRX, RARA, EP300, JMJD1C, KLF4, FOXO1	710	83	18811	2.55367	1	1	0.995386
GOTERM_MF_DIRECT	GO:0043021~ribonucleoprotein complex binding	5	0.600962	1.38122	0.0415698	DDX5, CBX5, MDM2, SRP54, PITX2	710	35	18811	3.78491	1	1	0.995386
GOTERM_MF_DIRECT	GO:0005518~collagen binding	7	0.841346	1.36909	0.0427475	COMP, VTN, TNXB, LOX, COL14A1, ADAM9, HSD17B12	710	68	18811	2.72736	1	1	0.995386
GOTERM_MF_DIRECT	GO:0051010~microtubule plus-end binding	4	0.480769	1.36869	0.042787	CLIP3, APC, DST, CLIP4	710	21	18811	5.04655	1	1	0.995386
GOTERM_MF_DIRECT	GO:0060090~binding, bridging	8	0.961538	1.36173	0.0434784	MAGI2, AKAP9, WWC3, CAPN3, AKAP6, PSMG2, AXIN2, SEPTIN11	710	86	18811	2.46459	1	1	0.995386
GOTERM_MF_DIRECT	GO:0035198~miRNA binding	5	0.600962	1.34272	0.0454235	ZC3H7A, KCNQ1OT1, HNRNPA2B1, YBX1, NEAT1	710	36	18811	3.67977	1	1	0.995386
GOTERM_MF_DIRECT	GO:0045505~dynein intermediate chain binding	5	0.600962	1.34272	0.0454235	DYNC2H1, DNAH1, DYNLT4, HTT, BICD1	710	36	18811	3.67977	1	1	0.995386
GOTERM_MF_DIRECT	GO:0005200~structural constituent of cytoskeleton	9	1.08173	1.30842	0.0491565	DSP, SYNM, KRT19, ARPC3, DMD, ADD3, SPTAN1, BICD1, PLEC	710	107	18811	2.2285	1	1	0.995386
GOTERM_MF_DIRECT	GO:0019838~growth factor binding	5	0.600962	1.30566	0.0494697	BMPR2, DUSP1, TEK, TGFBR1, ACVR2A	710	37	18811	3.58032	1	1	0.995386
GOTERM_MF_DIRECT	GO:0051219~phosphoprotein binding	5	0.600962	1.26996	0.0537076	RB1, PITX2, PKD2, MID1, MID2	710	38	18811	3.4861	1	1	0.995386
GOTERM_MF_DIRECT	GO:0035064~methylated histone binding	7	0.841346	1.22098	0.0601206	CBX5, ZMYND8, ATRX, CBX1, MPHOSPH8, KDM7A, TDRD3	710	74	18811	2.50622	1	1	0.995386
GOTERM_MF_DIRECT	GO:0051018~protein kinase A binding	4	0.480769	1.17845	0.0663052	AKAP12, LRRK2, RARA, AKAP6	710	25	18811	4.2391	1	1	0.995386
GOTERM_MF_DIRECT	GO:0000976~transcription regulatory region sequence-specific DNA binding	15	1.80288	1.17234	0.0672457	FOXC2, ZFHX3, CCNT1, NFYB, ASH2L, ARID4B, FOS, KLF4, GLIS2, PER1, PER3, DMTF1, CRY2, PITX2, ATF3	710	238	18811	1.66981	1	1	0.995386
GOTERM_MF_DIRECT	GO:0003700~transcription factor activity, sequence-specific DNA binding	29	3.48558	1.14653	0.0713621	CSRNP1, FOXC2, FOXE1, FOXO1, PITX2, ZFP37, KLF10, SMAD1, ZFHX3, ZNF382, NFYB, EBF1, FOS, KLF4, KLF2, ELF1, ZNF91, ZEB1, MAF, DMTF1, NFIA, NFIB, BHLHE40, KLF9, REL, SNAI1, RARA, FOSB, ATF3	710	554	18811	1.38689	1	1	0.995386
GOTERM_MF_DIRECT	GO:0048487~beta-tubulin binding	5	0.600962	1.13939	0.072546	EML4, RGS2, TAOK1, HTT, APPL1	710	42	18811	3.15409	1	1	0.995386
GOTERM_MF_DIRECT	GO:0043422~protein kinase B binding	3	0.360577	1.13718	0.0729159	RARA, SRSF5, APPL1	710	12	18811	6.62359	1	1	0.995386
GOTERM_MF_DIRECT	GO:0033857~diphosphoinositol-pentakisphosphate kinase activity	2	0.240385	1.13099	0.0739628	PPIP5K1, PPIP5K2	710	2	18811	26.4944	1	1	0.995386
GOTERM_MF_DIRECT	GO:0046872~metal ion binding	114	13.7019	1.10542	0.0784474	GALNT12, CHPF, ZMYND8, JADE1, LTN1, JMJD1C, ADARB1, PPP1CC, ZFP36, ZNF84, EP300, ZNF841, ZNF445, STK32B, OSR2, POSTN, MBNL2, LIMCH1, CACNA2D1, OSR1, ZNF160, EBF1, ADAM10, ZNF10, LMO7, DICER1, MID1, RUFY2, ADAM9, OPTN, ZNF432, DGKI, ZNF431, ZNF670, KMT2C, ZMPSTE24, GLIS2, MGC16025, ZNF708, NUAK1, MAN2A1, VPS8, RNF217, HLTF, ZNF300, SMAD1, FER1L4, ZRANB2, ZNF382, FUS, ADHFE1, NEK7, CYBRD1, HELZ, CN…	710	2642	18811	1.14321	1	1	0.995386
GOTERM_MF_DIRECT	GO:0008017~microtubule binding	16	1.92308	1.09986	0.0794593	MACF1, DST, CEP295, LRRK2, DCLK2, FMN1, FMN2, MID1, MID2, EML4, CLIP3, APC, REEP3, KIF5B, VPS41, JMY	710	266	18811	1.59365	1	1	0.995386
GOTERM_MF_DIRECT	GO:0042805~actinin binding	3	0.360577	1.07529	0.084084	LMO7, PDLIM5, PKD2	710	13	18811	6.11408	1	1	0.995386
GOTERM_MF_DIRECT	GO:0016301~kinase activity	14	1.68269	1.06203	0.0866903	CDKN2A, LRRK2, MAGI2, ELP1, STK39, AKAP6, PIK3R2, SGMS2, CLK4, PIK3CA, WNK1, TAOK1, AKAP9, CERT1	710	226	18811	1.64124	1	1	0.995386
GOTERM_MF_DIRECT	GO:0070411~I-SMAD binding	3	0.360577	1.01896	0.0957277	SMAD1, AXIN2, TGFBR1	710	14	18811	5.67736	1	1	0.995386
GOTERM_MF_DIRECT	GO:0008134~transcription factor binding	13	1.5625	1.00905	0.0979375	RB1, TLE1, CCNT1, CDKN2A, FHL2, FOS, MEIS2, NFIA, STING1, RARA, EP300, FOSB, PITX2	710	209	18811	1.64797	1	1	0.995386

## Sheet: Down DEGs GO_CC
Table S4. GO enrichment analysis for the 826 downregulated DEGs based on the category Cellular Component
Category	Term	Count	%	log10 (p-value)	PValue	Genes	List Total	Pop Hits	Pop Total	Fold Enrichment	Bonferroni	Benjamini	FDR
GOTERM_CC_DIRECT	GO:0005737~cytoplasm	271	32.5721	7.60632	2.47557e-08	GLTP, SLC23A2, ZMYND8, DDX60L, CBLB, ADARB1, FNBP1L, RPL6, IFIT2, RPS6KA6, RASSF2, FBXO3, SRGAP2B, STARD4, MBNL2, LIMCH1, TYW3, ARRDC3, RECQL, FRS2, DICER1, HCFC2, EML4, EID3, CYP2U1, TEP1, HECW2, RUFY3, RUFY2, AKAP9, SIK1, BLZF1, OPTN, MACF1, INTU, HSPA4L, DCUN1D1, SNX3, NUAK1, HSPH1, RDH10, RNF217, HLTF, STK38L, SNX9, CDK17, PLK3, NDFIP2, PLK2, INTS3, DCLK2, SETX, SPART, EPRS1, WNK1, ZUP1, FUBP…	746	5570	20472	1.33517	1.49771e-05	1.07883e-05	1.05743e-05
GOTERM_CC_DIRECT	GO:0005856~cytoskeleton	48	5.76923	7.44777	3.56638e-08	MACF1, PLEKHH2, DYRK3, LRP1, STK39, RAPH1, FMN2, CMAHP, FNBP1L, ADD3, UACA, BICD1, SEPTIN11, SYNE1, AKAP12, PPP1CC, BAIAP2L1, CALD1, SGCB, TTC21B, EPB41L2, CTNNA1, PTK2B, DMD, LRRFIP1, SPTAN1, JAK1, CFAP44, DSP, PLEKHG3, SLC30A9, DST, CEP295, SHROOM3, DCLK2, RHOB, TM9SF2, EML4, MYO1E, KRT19, EVC, AKAP9, JMY, TRIP11, IFT46, UTRN, FERMT2, PLEC	746	541	20472	2.43481	2.15763e-05	1.07883e-05	1.05743e-05
GOTERM_CC_DIRECT	GO:0005829~cytosol	262	31.4904	6.59325	2.55122e-07	GLTP, RB1, WIPF1, RAPH1, CBLB, ADARB1, FNBP1L, LIPA, RPL6, GLS, IFIT2, RABGEF1, RPS6KA6, RASSF2, BAIAP2L1, MPRIP, FBXO3, CCN2, STARD4, AFAP1, FRS2, DICER1, HCFC2, SRRM1, EML4, DAAM1, RUFY3, AKAP9, NGEF, OPTN, TMEM87B, STXBP3, HSPA4L, DCUN1D1, C1ORF198, PIK3R2, GIGYF2, SNX3, HSPH1, EPB41L2, RNF217, STK38L, SNX9, TRPM4, ATP6V0A1, CARMIL1, PLK2, LRBA, RASSF9, STAM, SPART, EPRS1, WNK1, ZUP1, GOLGB1, …	746	5477	20472	1.31274	0.000154337	5.14496e-05	5.04291e-05
GOTERM_CC_DIRECT	GO:0005794~Golgi apparatus	75	9.01442	6.2884	5.14753e-07	GALNT12, LRRK2, ZMYND8, PKD2, BICD1, SH3RF1, SYNE1, FYCO1, RASSF2, GNPTAB, AP1G2, TMEM43, FAM3C, SLC30A7, DYNC2H1, SRGN, F2R, PAQR3, VPS13A, ADAM10, AP3B1, MID1, ZDHHC17, GOLGA8B, RER1, AKAP9, OPTN, BLZF1, B4GALT4, MACF1, TMEM87B, PKDCC, SLC35D1, LRP1, TNKS, PRUNE2, NEDD9, HTT, SGMS2, GIGYF2, FSTL3, ARL17B, ATXN2, CAND1, MGAT5, ST3GAL5, DMD, CERT1, TRPM4, ATP6V0A1, OSBPL9, GALNT7, TRAPPC3, NDFIP2…	746	1122	20472	1.83438	0.000311377	7.78564e-05	7.63121e-05
GOTERM_CC_DIRECT	GO:0005925~focal adhesion	37	4.44712	5.61111	2.44846e-06	LRP1, ITGB5, DOCK7, FHL2, NEDD9, NEXN, PIK3R2, RPL6, AKAP12, PPP1CC, ADGRE5, MPRIP, EPB41L2, CTNNA1, TM4SF20, PTK2B, JAK1, LIMS4, DST, AFAP1, ADAM10, LMO7, PTPN12, HSPG2, RHOB, PTPRA, PEAK1, ARPC3, FAT1, ITGBL1, CD9, ADAM9, TEK, PHLDB2, FERMT2, LIMS2, PLEC	746	424	20472	2.39473	0.00148023	0.000296264	0.000290388
GOTERM_CC_DIRECT	GO:0005912~adherens junction	21	2.52404	5.20648	6.21617e-06	SYNM, OXTR, BMPR2, LAMA3, ADAM10, NEXN, SHROOM3, FRS2, LMO7, FMN1, PARD3B, TJP1, CDH6, MYO1E, AHI1, BAIAP2L1, APC, CDH10, CTNNA1, PDLIM5, FERMT2	746	175	20472	3.29308	0.00375373	0.000626797	0.000614364
GOTERM_CC_DIRECT	GO:0005634~nucleus	267	32.0913	4.52417	2.99107e-05	RB1, TFRC, CCNH, ZMYND8, ADARB1, SMC6, RPL6, RASSF2, CCNL2, CCNL1, ZNF841, ZNF160, RECQL, EBF1, ZNF10, DICER1, HCFC2, SRRM1, EID3, RUFY2, VDAC3, MXRA8, SIK1, TSPYL6, BLZF1, OPTN, ATF3, HSPA4L, DCUN1D1, PIK3R2, MEG8, NUAK1, PGBD3, ZNF708, HSPH1, HLTF, CDK17, PLK3, ZNF382, PLK2, INTS3, PHC3, MED13L, SETX, ZUP1, FUBP1, CREBRF, FAT1, ID4, REL, SNAI1, RAD17, PSMG2, CDK13, FERMT2, LDHAL6B, CSRNP1, ZNF1…	746	5930	20472	1.2356	0.0179335	0.00258514	0.00253387
GOTERM_CC_DIRECT	GO:0042995~cell projection	19	2.28365	3.88599	0.000130021	SLC12A2, MACF1, TENM3, DST, DENND1A, SLC2A3, PTPN12, PKD2, ZDHHC17, RHOB, TJP1, ODF2L, SMCR8, DMD, UTRN, PDLIM5, CEP43, SPTAN1, KCTD16	746	183	20472	2.84921	0.0756532	0.00983285	0.00963782
GOTERM_CC_DIRECT	GO:0005654~nucleoplasm	183	21.9952	3.66197	0.000217788	RB1, CCNT1, CCNH, ZMYND8, JADE1, JMJD1C, ARID4B, CBLB, SMC6, ADARB1, LIPA, CDH6, PPP1CC, RPS6KA6, RASSF2, BAIAP2L1, SESN1, FBXO3, DPF3, EP300, KPNA5, CCNL2, MACROD2, PITX2, HMGN1, MAP2K3, MBNL2, TLE1, RECQL, LMO7, RPGRIP1L, HCFC2, SRRM1, EID3, DMTF1, NCL, SRSF5, SREK1, LRIF1, UTRN, BLZF1, OPTN, ZNF432, ATF3, DDX5, MINDY2, TNKS, KMT2C, CTR9, UBR4, DCUN1D1, STK39, UAP1, FOXO1, GLIS2, NPAT, NUAK1, P…	746	3939	20472	1.27493	0.123463	0.0146402	0.0143498
GOTERM_CC_DIRECT	GO:0016607~nuclear speck	31	3.72596	3.224	0.000597042	RBM25, DDX5, DYRK3, CTR9, SRP54, JADE1, SMC6, GLIS2, PPP1CC, GRK5, CCNL2, CCNL1, SF3B1, ATP6V0A1, RBM39, CARMIL1, API5, CDC5L, SRRM1, NR4A2, CACNB4, PRPF18, STK17A, ZNF638, CRY2, LUC7L3, TRIP11, FAM76B, SREK1, SRSF5, CDK13	746	432	20472	1.96924	0.303243	0.036121	0.0354046
GOTERM_CC_DIRECT	GO:0030136~clathrin-coated vesicle	10	1.20192	3.06693	0.000857174	SNX3, MYO1E, LRP1, SORT1, DENND1A, VPS41, MALL, ADAM10, SNX9, BTBD8	746	69	20472	3.97715	0.404773	0.0471446	0.0462095
GOTERM_CC_DIRECT	GO:0005938~cell cortex	16	1.92308	3.00681	0.000984438	DST, NEDD9, FMN2, FRY, ADD3, FNBP1L, RHOB, PARD3B, AKAP12, NCL, EPB41L2, PTK2B, CCN2, MYH10, SPTAN1, FERMT2	746	164	20472	2.6773	0.448922	0.0496321	0.0486476
GOTERM_CC_DIRECT	GO:0005795~Golgi stack	7	0.841346	2.69508	0.00201799	CLIP3, PLK3, GOLGB1, LPCAT2, AKAP9, SULF1, SULF2	746	37	20472	5.1918	0.705394	0.0939141	0.0920513
GOTERM_CC_DIRECT	GO:0016020~membrane	120	14.4231	2.62501	0.00237132	GLTP, SEMA5A, SLC46A3, ITPRIP, TFRC, TMEM131L, RPL6, KIF5B, MAP2K3, MAGI2, RECQL, ADAM10, FRS2, DNAJB14, HSPG2, EML4, DAAM1, NCL, RUFY3, VDAC3, ADAM9, UTRN, NGEF, DGKI, MACF1, DDX5, TMEM87B, UBR4, GIGYF2, ZMPSTE24, ATXN2, MAN2A1, HLTF, STK38L, CERT1, ATP6V0A1, OSBPL9, API5, LRBA, HELZ, CNOT6, EPRS1, WNK1, ARPC3, PTPRA, REEP3, GOLGB1, FAT1, LAT, CLIC4, TENM3, DOCK9, SLC2A3, CMAHP, PCSK6, PKD2, BIC…	746	2547	20472	1.29293	0.762206	0.102475	0.100442
GOTERM_CC_DIRECT	GO:0015629~actin cytoskeleton	20	2.40385	2.52316	0.00299807	MACF1, CLIC4, DST, WIPF1, ARPC1A, NEXN, AFAP1, FMN2, MYO1E, BAIAP2L1, SIPA1L1, MPRIP, CALD1, ARPC3, PEAK1, CAPZA2, CTNNA1, RARA, STK38L, PDLIM5	746	258	20472	2.12731	0.837415	0.120922	0.118524
GOTERM_CC_DIRECT	GO:0005911~cell-cell junction	16	1.92308	2.34087	0.00456178	CLIC4, USP53, FZD4, TRPC4, MAGI2, FRS2, RPGRIP1L, ADD3, PKD2, AHI1, MYH2, FAT1, CTNNA1, TEK, LAT, LIMS2	746	192	20472	2.28686	0.937099	0.172492	0.169071
GOTERM_CC_DIRECT	GO:0016323~basolateral plasma membrane	18	2.16346	2.18263	0.00656711	DSP, SLC12A2, SLC23A2, SLC38A1, LRP1, TFRC, STXBP3, TRPC4, ABCC5, STK39, PKD2, TJP1, SLC6A6, SLC7A6, ADAM9, TEK, SLC12A6, SLC29A1	746	238	20472	2.07547	0.98143	0.233712	0.229076
GOTERM_CC_DIRECT	GO:0034451~centriolar satellite	11	1.32212	1.98352	0.0103867	RBM39, ODF2L, TAF1D, KIF5B, SASS6, DDHD2, CEP162, TEK, LRIF1, FNIP2, MID1	746	117	20472	2.58005	0.998194	0.312045	0.305856
GOTERM_CC_DIRECT	GO:1990909~Wnt signalosome	4	0.480769	1.98103	0.0104465	APC, LRRK2, WNT2, RECK	746	13	20472	8.4438	0.998259	0.312045	0.305856
GOTERM_CC_DIRECT	GO:0030027~lamellipodium	15	1.80288	1.96821	0.0107595	CARMIL1, PLEKHH2, RAPH1, NEDD9, PKD2, SH3RF1, APC, PIK3CA, ARPC3, RUFY3, FAT1, CTNNA1, PTK2B, DMD, MYH10	746	192	20472	2.14393	0.998562	0.312045	0.305856
GOTERM_CC_DIRECT	GO:0000781~chromosome, telomeric region	14	1.68269	1.96532	0.0108313	CBX5, SSB, TNKS, ATRX, CBX1, SMC6, CDC73, SETX, PPP1CC, EID3, TEP1, HNRNPA2B1, RAD17, LRIF1	746	173	20472	2.22077	0.998624	0.312045	0.305856
GOTERM_CC_DIRECT	GO:1990531~Lem3p-Dnf1p complex	4	0.480769	1.88804	0.0129409	ATP8B1, ATP10D, ATP11C, ATP10A	746	14	20472	7.84067	0.999622	0.355875	0.348816
GOTERM_CC_DIRECT	GO:1990904~ribonucleoprotein complex	13	1.5625	1.78903	0.0162545	DDX5, CBX5, MYEF2, SSB, LRRK2, YBX1, ATXN2, ZFP36, EPRS1, TEP1, NCL, HNRNPA2B1, PABPC1L	746	163	20472	2.18865	0.999951	0.405935	0.397883
GOTERM_CC_DIRECT	GO:0032991~macromolecular complex	38	4.56731	1.7802	0.0165882	NPR3, LENG8, HTT, METTL21A, GIGYF2, ZMPSTE24, ATP5IF1, COMP, UFL1, PPP1CC, RASSF2, HSPH1, BTBD1, CAPN3, HES1, EPS8L2, DMD, MBP, SKIL, RBM39, SMAD1, CBX5, CDKN2A, NCOA3, MAGI2, ZNF10, PARD3B, NR4A2, TJP1, MYH2, WNK1, RARA, MDM2, CD9, LY6G5B, UTRN, DGKI, RAB3GAP1	746	703	20472	1.48337	0.99996	0.405935	0.397883
GOTERM_CC_DIRECT	GO:0001725~stress fiber	8	0.961538	1.77536	0.0167742	DAAM1, LIMCH1, ROR1, TEK, PDLIM5, MYH10, FERMT2, SEPTIN11	746	73	20472	3.00738	0.999964	0.405935	0.397883
GOTERM_CC_DIRECT	GO:0070062~extracellular exosome	100	12.0192	1.73872	0.0182505	SEMA5A, SLC46A3, TFRC, COMP, EFEMP1, BAIAP2L1, FAM3C, DYNC2H1, SLC38A1, CACNA2D1, ADAM10, DICER1, HSPG2, MID2, NCL, MXRA8, SMS, VDAC3, ADAM9, UTRN, DDX5, STXBP3, NPR3, LTBP3, ZMPSTE24, SNX3, VTN, HSPH1, MAN2A1, EPB41L2, IGFBP7, SNX9, MYH10, ATP6V0A1, WNT4, CARMIL1, CYBRD1, RASSF9, GGCT, BST1, ARPC3, PTPRA, FAT1, GNB4, NIT2, CLIC4, BTG2, ITGB5, LRRK2, ARPC1A, SLC2A3, YBX1, PKD2, N4BP2L2, PTPRF, EE…	746	2218	20472	1.23726	0.999986	0.424676	0.416252
GOTERM_CC_DIRECT	GO:0005783~endoplasmic reticulum	56	6.73077	1.68199	0.0207976	PHTF2, LRRK2, SRP54, YBX1, TMEM131L, FMN2, ARHGAP5, PCSK6, PKD2, PIK3C2B, IFIT2, UFL1, SERAC1, SLC36A1, SMIM14, STARD4, SLC30A9, PTGIS, ATP11C, DNAJB14, FOS, PTP4A1, OLFM1, RER1, MXRA7, CEMIP, INSIG2, YTHDC2, LAMA3, ATP10D, MOSPD2, TMTC3, TMTC2, HTT, ATP10A, HSD17B12, GIGYF2, VTN, ERLEC1, PGRMC2, AGA, MEST, CERT1, LNPK, TRPM4, TRAPPC3, NDFIP2, POU2F1, PNPLA7, ATP8B1, LRBA, ORMDL1, SULF1, SULF2, T…	746	1142	20472	1.34568	0.999997	0.465202	0.455975
GOTERM_CC_DIRECT	GO:0016010~dystrophin-associated glycoprotein complex	4	0.480769	1.65172	0.022299	KRT19, SGCB, DMD, UTRN	746	17	20472	6.45703	0.999999	0.465202	0.455975
GOTERM_CC_DIRECT	GO:0098797~plasma membrane protein complex	4	0.480769	1.65172	0.022299	SLC6A6, EVC, LRP1, HSPG2	746	17	20472	6.45703	0.999999	0.465202	0.455975
GOTERM_CC_DIRECT	GO:0030056~hemidesmosome	3	0.360577	1.60921	0.0245917	DST, LAMA3, PLEC	746	7	20472	11.761	1	0.492519	0.48275
GOTERM_CC_DIRECT	GO:0005798~Golgi-associated vesicle	4	0.480769	1.58418	0.0260506	AP1G2, LRRK2, VPS41, ADAM10	746	18	20472	6.0983	1	0.492519	0.48275
GOTERM_CC_DIRECT	GO:0043034~costamere	4	0.480769	1.58418	0.0260506	SYNM, KRT19, DMD, PLEC	746	18	20472	6.0983	1	0.492519	0.48275
GOTERM_CC_DIRECT	GO:0031410~cytoplasmic vesicle	20	2.40385	1.52498	0.0298554	SLC30A7, SLC30A9, STARD4, DST, TFRC, SORT1, WIPF1, DENND1A, LRRK2, FNBP1L, PKD2, PRSS12, BICD1, RHOB, TBC1D2, TP53INP1, MALL, JMY, SNX9, APPL1	746	325	20472	1.68876	1	0.54735	0.536493
GOTERM_CC_DIRECT	GO:0005814~centriole	12	1.44231	1.50706	0.0311128	NEDD1, AHI1, ODF2L, INTU, PLK2, CEP295, MAGI2, SASS6, CEP162, HTT, CEP170, CEP43	746	159	20472	2.07112	1	0.553278	0.542304
GOTERM_CC_DIRECT	GO:0016593~Cdc73/Paf1 complex	3	0.360577	1.49474	0.0320078	CTR9, LEO1, CDC73	746	8	20472	10.2909	1	0.553278	0.542304
GOTERM_CC_DIRECT	GO:0005811~lipid particle	9	1.08173	1.46521	0.0342603	SPART, PNPLA7, VPS13C, RDH10, LPCAT2, VPS13A, LDAF1, RAB3GAP1, ATG2B	746	103	20472	2.39788	1	0.575763	0.564342
GOTERM_CC_DIRECT	GO:0009925~basal plasma membrane	6	0.721154	1.4279	0.0373338	SLC12A2, SLC23A2, BMPR2, DST, TEK, PKD2	746	51	20472	3.22851	1	0.606033	0.594013
GOTERM_CC_DIRECT	GO:0005801~cis-Golgi network	7	0.841346	1.3787	0.0418114	GOLGA8B, MAN2A1, GOLGB1, AKAP9, TRIP11, CCN2, BLZF1	746	70	20472	2.74424	1	0.606033	0.594013
GOTERM_CC_DIRECT	GO:0030424~axon	21	2.52404	1.37056	0.0426032	SLC38A1, TENM3, BMPR2, DST, ANXA3, LRRK2, DOCK7, ADAM10, NEXN, HTT, PRSS12, BTBD8, SEPTIN11, SETX, OLFM1, RUFY3, DMD, RGS7BP, SLC12A6, DGKI, PLEC	746	361	20472	1.59637	1	0.606033	0.594013
GOTERM_CC_DIRECT	GO:0036064~ciliary basal body	12	1.44231	1.36016	0.0436352	NEDD1, AHI1, ODF2L, EVC, INTU, DAAM1, JADE1, NEDD9, RPGRIP1L, ERC1, IFT46, PKD2	746	168	20472	1.96017	1	0.606033	0.594013
GOTERM_CC_DIRECT	GO:0016604~nuclear body	20	2.40385	1.35886	0.0437666	CENPT, FOXC2, ZFHX3, PLEKHH2, TNKS, ATP8B1, ATRX, RAPH1, HCFC2, SETX, PGBD3, SLTM, BHLHE40, MDM2, CREBRF, SH3BP5, POLK, ERCC6, MAMLD1, ZNF300	746	339	20472	1.61902	1	0.606033	0.594013
GOTERM_CC_DIRECT	GO:0043025~neuronal cell body	23	2.76442	1.3587	0.0437823	SLC12A2, PLK3, SLC38A1, BMPR2, LRP1, NEGR1, SORT1, ANXA3, DENND1A, LRRK2, ADAM10, PTPRF, AKAP12, SLC6A6, OLFM1, RUFY3, AKAP9, EFHC1, PTK2B, MBP, DMD, DGKI, TRPM4	746	407	20472	1.5508	1	0.606033	0.594013
GOTERM_CC_DIRECT	GO:0005667~transcription factor complex	15	1.80288	1.35426	0.0442323	RB1, SMAD1, ZFHX3, TLE1, FOS, KLF4, NR4A2, MED23, NR4A1, REL, ANKRD1, RARA, EP300, PITX2, SKIL	746	231	20472	1.78197	1	0.606033	0.594013
GOTERM_CC_DIRECT	GO:0030054~cell junction	15	1.80288	1.34104	0.0455992	DSP, MACF1, ITGB5, PARD3B, TJP1, CDH6, TBC1D2, NFIA, EPB41L2, RUFY3, CTNNA1, DMD, UTRN, SPTAN1, FERMT2	746	232	20472	1.77429	1	0.606033	0.594013
GOTERM_CC_DIRECT	GO:0030659~cytoplasmic vesicle membrane	10	1.20192	1.33571	0.0461622	SLC12A2, CLIC4, GPRC5A, STING1, FZD6, SH3BP5, HTT, SNX9, FMN2, PKD2	746	129	20472	2.12731	1	0.606033	0.594013
GOTERM_CC_DIRECT	GO:0048471~perinuclear region of cytoplasm	38	4.56731	1.32741	0.0470529	CLIC4, TFRC, YTHDC2, HTT, AKAP6, FMN2, GDPD5, BICD1, SH3RF1, ATXN2, KIF5B, TLK2, PTK2B, DMD, CCN2, RHPN2, CERT1, ATP6V0A1, SLC30A7, UPF2, NDFIP2, SORT1, FUS, MAGI2, CDC5L, DICER1, MEIS2, APC, STING1, PIK3CA, TAOK1, FAT1, RARA, EXOC6, CEP43, DGKI, OPTN, PLEC	746	763	20472	1.36672	1	0.606033	0.594013
GOTERM_CC_DIRECT	GO:0005802~trans-Golgi network	13	1.5625	1.32716	0.0470803	POSTN, ATP8B1, LRRK2, GCNT1, ADAM10, ATP11C, BICD1, CLIP3, ATXN2, ARL5B, SNX9, BIRC6, OPTN	746	191	20472	1.8678	1	0.606033	0.594013
GOTERM_CC_DIRECT	GO:0034703~cation channel complex	3	0.360577	1.30953	0.0490308	TRPC4, TRPC1, PKD2	746	10	20472	8.23271	1	0.610985	0.598866
GOTERM_CC_DIRECT	GO:0035371~microtubule plus-end	4	0.480769	1.30553	0.0494847	CLIP3, DST, CLIP4, NCKAP5	746	23	20472	4.77258	1	0.610985	0.598866
GOTERM_CC_DIRECT	GO:0000139~Golgi membrane	33	3.96635	1.29483	0.0507191	GALNT12, TMEM87B, CHPF, TNKS, LRRK2, GCNT1, AP1G2, GNPTAB, MAN2A1, MGAT5, ST3GAL5, GCNT4, ERC1, GALNT7, TRAPPC3, NDFIP2, ABCA5, CHPF2, ABCA6, C1GALT1, PAQR3, ADAM10, PLEKHA3, ZDHHC17, GOLGA8B, STING1, GOLGB1, LPCAT2, MALL, TRIP11, OPTN, BLZF1, B4GALT4	746	648	20472	1.39753	1	0.613701	0.601528
GOTERM_CC_DIRECT	GO:0019898~extrinsic component of membrane	7	0.841346	1.28042	0.05243	BST1, OSR1, VPS13C, TPR, STK39, VPS13A, ATG2B	746	74	20472	2.5959	1	0.621964	0.609627
GOTERM_CC_DIRECT	GO:0043235~receptor complex	14	1.68269	1.25795	0.0552146	BMPR2, LRP1, ITGB5, PTPRQ, TRPC1, TGFBR1, ACVR2A, GPRC5A, PTPRA, OLR1, ROR1, TEK, CRLF1, KCTD16	746	217	20472	1.77047	1	0.642401	0.629659
GOTERM_CC_DIRECT	GO:0035097~histone methyltransferase complex	4	0.480769	1.215	0.0609541	CBX5, KMT2C, ASH2L, HCFC2	746	25	20472	4.39078	1	0.695797	0.681996
GOTERM_CC_DIRECT	GO:0005614~interstitial matrix	3	0.360577	1.16391	0.0685638	CCDC80, COL14A1, KAZALD1	746	12	20472	6.86059	1	0.768168	0.752932
GOTERM_CC_DIRECT	GO:0005681~spliceosomal complex	9	1.08173	1.08006	0.0831644	DDX5, PRPF18, API5, NCL, HNRNPA2B1, CDC5L, SREK1, SF3B1, SRRM1	746	124	20472	1.99178	1	0.914809	0.896664
GOTERM_CC_DIRECT	GO:0005721~pericentric heterochromatin	4	0.480769	1.05961	0.0871749	CBX5, ATRX, CBX1, SNAI1	746	29	20472	3.78515	1	0.93589	0.917327
GOTERM_CC_DIRECT	GO:0000785~chromatin	48	5.76923	1.04404	0.0903573	RB1, CSRNP1, FOXC2, FOXE1, JMJD1C, FOXO1, NSD3, MUC1, DPF3, HES1, PITX2, HES4, HMGN1, KLF10, SS18, SMAD1, ZFHX3, PBRM1, POU2F1, UBE2B, NFYB, OSR1, NCOA3, PLK2, CBX1, EBF1, NAP1L1, FOS, KLF4, MEIS2, KLF2, POU5F2, NR4A2, NR4A1, ELF1, ZEB1, MAF, NFIA, NFIB, BHLHE40, KLF9, REL, RARA, FOSB, SMCR8, TSPYL6, ATF3, LHX9	746	1057	20472	1.2462	1	0.93589	0.917327
GOTERM_CC_DIRECT	GO:0005796~Golgi lumen	8	0.961538	1.03638	0.091964	VTN, MUC1, VCAN, ABCC5, PCSK6, SOD3, HSPG2, WNT4	746	106	20472	2.07112	1	0.93589	0.917327
GOTERM_CC_DIRECT	GO:0016324~apical plasma membrane	20	2.40385	1.03478	0.0923045	SLC12A2, SLC23A2, OXTR, BMPR2, STXBP3, ATP8B1, ABCC5, FZD6, STK39, SHROOM3, CYBRD1, LMO7, PARD3B, TJP1, SLC6A6, MUC1, FAT1, CD9, TEK, SLC29A1	746	374	20472	1.46751	1	0.93589	0.917327
GOTERM_CC_DIRECT	GO:0009986~cell surface	31	3.72596	1.03213	0.0928692	CLIC4, BMPR2, INTU, ITGB5, TFRC, PCSK6, ATP5IF1, DMD, MBP, WNT4, TNFSF18, SORT1, FZD4, TRPC4, FZD6, F2R, ADAM10, LMO7, SULF1, TGFBR1, CEACAM19, ACVR2A, SULF2, RER1, RARA, MXRA8, ITGBL1, ADAM9, ROR1, TEK, FERMT2	746	638	20472	1.33341	1	0.93589	0.917327
GOTERM_CC_DIRECT	GO:0016514~SWI/SNF complex	4	0.480769	1.0252	0.0943625	RB1, SS18, PBRM1, DPF3	746	30	20472	3.65898	1	0.93589	0.917327

## Sheet: Up DEGs GO_BP
Table S4. GO enrichment analysis for the 126 upregulated DEGs based on the category Biological Process
Category	Term	Count	%	log10(p-value)	PValue	Genes	List Total	Pop Hits	Pop Total	Fold Enrichment	Bonferroni	Benjamini	FDR
GOTERM_BP_DIRECT	GO:0070098~chemokine-mediated signaling pathway	10	7.93651	9.61048	2.452e-10	CXCL6, CCL8, CXCL8, CCL7, CCL5, CCL2, CXCL1, CXCL3, CXCL5, PF4V1	112	70	19256	24.5612	2.3907e-07	2.3907e-07	2.35392e-07
GOTERM_BP_DIRECT	GO:0030593~neutrophil chemotaxis	10	7.93651	8.98158	1.04332e-09	CXCL6, CCL8, CXCL8, CCL7, CCL5, CCL2, CXCL1, CXCL3, CXCL5, PF4V1	112	82	19256	20.9669	1.01723e-06	5.08616e-07	5.00792e-07
GOTERM_BP_DIRECT	GO:0006954~inflammatory response	17	13.4921	8.74987	1.77882e-09	GBP5, CXCL6, IL1RN, CD40, CXCL8, TNFAIP6, LOXL3, CXCL1, CXCL3, TNFRSF1B, CXCL5, CCL8, CCL7, CCL5, ADORA1, CCL2, PF4V1	112	411	19256	7.1114	1.73435e-06	5.78117e-07	5.69223e-07
GOTERM_BP_DIRECT	GO:0061844~antimicrobial humoral immune response mediated by antimicrobial peptide	9	7.14286	6.65472	2.2145e-07	CXCL6, CCL8, CXCL8, H2BC10, H2BC4, CXCL1, CXCL3, CXCL5, PF4V1	112	109	19256	14.1959	0.00021589	5.39784e-05	5.3148e-05
GOTERM_BP_DIRECT	GO:0071222~cellular response to lipopolysaccharide	10	7.93651	5.75085	1.7748e-06	CXCL6, CSF3, CD40, CXCL8, CCL2, CXCL1, CXCL3, TNFRSF1B, CXCL5, PF4V1	112	193	19256	8.90822	0.00172893	0.000346085	0.000340761
GOTERM_BP_DIRECT	GO:0006342~chromatin silencing	6	4.7619	5.22842	5.90984e-06	H2AC11, H2AC13, H2AC4, H2AC21, H2AC16, H2AC17	112	45	19256	22.9238	0.00574554	0.000960349	0.000945574
GOTERM_BP_DIRECT	GO:0006935~chemotaxis	8	6.34921	5.14491	7.16287e-06	CXCL6, CCL8, CXCL8, CCL7, CCL5, CCL2, CXCL1, CXCL5	112	123	19256	11.1823	0.00695949	0.000997685	0.000982336
GOTERM_BP_DIRECT	GO:0006955~immune response	12	9.52381	3.89093	0.000128549	IL32, CXCL6, CSF3, ADAMDEC1, IL1RN, CCL8, CXCL8, CCL5, CCL2, TNFRSF1B, CTSS, CXCL5	112	492	19256	4.19338	0.117806	0.0125335	0.0123407
GOTERM_BP_DIRECT	GO:0071347~cellular response to interleukin-1	6	4.7619	3.76182	0.000173051	CD40, CCL8, CXCL8, CCL7, CCL5, CCL2	112	90	19256	11.4619	0.155271	0.0146493	0.0144239
GOTERM_BP_DIRECT	GO:0071356~cellular response to tumor necrosis factor	7	5.55556	3.74401	0.000180299	CD40, CCL8, CXCL8, CCL7, CCL5, CCL2, TNFRSF21	112	143	19256	8.41608	0.16122	0.0146493	0.0144239
GOTERM_BP_DIRECT	GO:0007267~cell-cell signaling	8	6.34921	3.42555	0.000375362	CXCL6, ADGRG1, CCL8, CCL7, TNFAIP6, CCL5, ADORA1, CXCL5	112	230	19256	5.98012	0.30653	0.0281522	0.0277191
GOTERM_BP_DIRECT	GO:0006334~nucleosome assembly	6	4.7619	3.13546	0.000732052	H2BC15, H3C11, H2BC10, H3C12, H2BC4, H3C2	112	123	19256	8.38676	0.510324	0.0503852	0.0496101
GOTERM_BP_DIRECT	GO:0043547~positive regulation of GTPase activity	7	5.55556	3.11061	0.000775157	GNAO1, CD40, CCL8, CCL7, CCL5, ARAP3, CCL2	112	188	19256	6.4016	0.530493	0.0503852	0.0496101
GOTERM_BP_DIRECT	GO:0071346~cellular response to interferon-gamma	5	3.96825	2.58743	0.00258566	GBP5, CCL8, CCL7, CCL5, CCL2	112	99	19256	8.68326	0.919885	0.126051	0.124112
GOTERM_BP_DIRECT	GO:0007155~cell adhesion	10	7.93651	2.30689	0.00493294	IL32, SRPX, PCDHGA11, SPON1, ADGRG1, TNFAIP6, TNC, CCL2, EMP2, PCDHAC2	112	557	19256	3.08669	0.991945	0.209114	0.205897
GOTERM_BP_DIRECT	GO:0007010~cytoskeleton organization	5	3.96825	2.02396	0.00946314	CCL7, EPB41L3, ARAP3, CCL2, APOE	112	143	19256	6.01149	0.999906	0.353738	0.348296
GOTERM_BP_DIRECT	GO:0007165~signal transduction	15	11.9048	1.85059	0.0141063	IL32, CXCL6, IL1RN, CXCL8, TNFAIP6, STAC, GMFG, ARAP3, CXCL1, CXCL5, CCL8, CCL7, ADORA1, CCL2, TNFRSF21	112	1267	19256	2.03546	0.999999	0.431127	0.424494
GOTERM_BP_DIRECT	GO:0045766~positive regulation of angiogenesis	5	3.96825	1.82324	0.0150232	RAMP2, CD40, CXCL8, CTSH, EMP2	112	164	19256	5.24172	1	0.431127	0.424494
GOTERM_BP_DIRECT	GO:0007186~G-protein coupled receptor signaling pathway	12	9.52381	1.684	0.0207012	GNAO1, ADGRG1, RAMP2, CCL8, CXCL8, CCL7, CCL5, ADORA1, CCL2, CXCL1, APOE, GPRC5C	112	947	19256	2.17861	1	0.545505	0.537112
GOTERM_BP_DIRECT	GO:0010628~positive regulation of gene expression	8	6.34921	1.53728	0.0290216	IL32, RAMP2, C1QTNF1, CXCL8, VDR, TNC, CTSH, PRDM1	112	513	19256	2.68115	1	0.673716	0.663351
GOTERM_BP_DIRECT	GO:0070374~positive regulation of ERK1 and ERK2 cascade	5	3.96825	1.36631	0.0430224	CCL8, CCL7, CCL5, CCL2, APOE	112	228	19256	3.77036	1	0.890374	0.876676
GOTERM_BP_DIRECT	GO:0030335~positive regulation of cell migration	5	3.96825	1.21582	0.0608387	CCL7, TNFAIP6, CCL5, CTSH, WASHC1	112	256	19256	3.35798	1	1	0.985626
GOTERM_BP_DIRECT	GO:0016477~cell migration	5	3.96825	1.15797	0.0695069	ADGRG1, LAMB3, LAMC3, WWC1, EMP2	112	268	19256	3.20762	1	1	0.985626

## Sheet: Up DEGs GO_MF
Table S4. GO enrichment analysis for the 126 upregulated DEGs based on the category Molecular Function
Category	Term	Count	%	log10(p-value)	PValue	Genes	List Total	Pop Hits	Pop Total	Fold Enrichment	Bonferroni	Benjamini	FDR
GOTERM_MF_DIRECT	GO:0008009~chemokine activity	10	7.93651	10.8231	1.50277e-11	CXCL6, CCL8, CXCL8, CCL7, CCL5, CCL2, CXCL1, CXCL3, CXCL5, PF4V1	114	50	18811	33.0018	3.89216e-09	2.34697e-09	2.31979e-09
GOTERM_MF_DIRECT	GO:0030527~structural constituent of chromatin	12	9.52381	10.7418	1.81234e-11	H2AC11, H2AC13, H2BC15, H3C11, H2BC10, H2AC4, H3C12, H2AC21, H2BC4, H3C2, H2AC16, H2AC17	114	99	18811	20.0011	4.69396e-09	2.34697e-09	2.31979e-09
GOTERM_MF_DIRECT	GO:0045236~CXCR chemokine receptor binding	6	4.7619	7.68866	2.04805e-08	CXCL6, CXCL8, CXCL1, CXCL3, CXCL5, PF4V1	114	15	18811	66.0035	5.30443e-06	1.76815e-06	1.74767e-06
GOTERM_MF_DIRECT	GO:0046982~protein heterodimerization activity	14	11.1111	6.44474	3.5914e-07	BARD1, H2AC4, H2BC4, H2AC16, H2AC17, H2AC11, H2AC13, H2BC15, H3C11, H2BC10, H3C12, H2AC21, ADORA1, H3C2	114	371	18811	6.22675	9.30129e-05	2.32543e-05	2.2985e-05
GOTERM_MF_DIRECT	GO:0008201~heparin binding	7	5.55556	3.16698	0.000680802	CXCL6, ADGRG1, CCL8, CXCL8, CCL7, APOE, PF4V1	114	176	18811	6.56285	0.161707	0.0297091	0.0293649
GOTERM_MF_DIRECT	GO:0048020~CCR chemokine receptor binding	4	3.1746	3.16226	0.000688241	CCL8, CCL7, CCL5, CCL2	114	29	18811	22.7598	0.163322	0.0297091	0.0293649
GOTERM_MF_DIRECT	GO:0003677~DNA binding	18	14.2857	2.76805	0.00170589	VDR, H2AC4, H2BC4, ZNF22, POU2F2, H2AC16, H2AC17, NPAS2, H2AC11, H2AC13, H2BC15, H3C11, H2BC10, H3C12, H2AC21, DMC1, TRIM16, H3C2	114	1286	18811	2.30961	0.357381	0.063118	0.0623869
GOTERM_MF_DIRECT	GO:0005515~protein binding	90	71.4286	2.49003	0.00323572	RIPOR3, SRPX, CXCL6, SPON1, CD40, IL1RN, CXCL8, CD82, TNFAIP6, PTPRN, WWC1, QPRT, TNC, LOXL3, CIB2, AKR1B1, CXCL1, PRDM1, H2AC16, H2AC17, CXCL5, H2AC11, IL4I1, H2AC13, MAGED4B, SALL1, C1QTNF1, BASP1, ADORA1, CTSH, PHACTR1, CPNE2, WASHC1, PF4V1, GBP5, ARG2, DGAT2, S100A2, MMD, H2AC4, MMP3, ARHGEF19, ARAP3, EMP2, GTPBP2, TNFRSF1B, TUBA4A, IFI27, H2BC10, DMC1, RBP1, TRIB3, TRIM16, MDFI, TNFRSF21, MT…	114	12539	18811	1.18437	0.568035	0.104757	0.103543
GOTERM_MF_DIRECT	GO:0001968~fibronectin binding	3	2.38095	1.80204	0.0157746	TNFAIP6, LOXL3, CTSS	114	32	18811	15.4696	0.983726	0.453959	0.448701
GOTERM_MF_DIRECT	GO:0005198~structural molecule activity	5	3.96825	1.57918	0.0263526	LAMB3, LAMC3, EPB41L3, MAP7, APOE	114	187	18811	4.412	0.999009	0.682532	0.674627
GOTERM_MF_DIRECT	GO:0019899~enzyme binding	7	5.55556	1.51811	0.0303311	H2AC11, CSF3, H2AC13, CD40, APOE, H2AC16, H2AC17	114	390	18811	2.9617	0.999657	0.707477	0.699282
GOTERM_MF_DIRECT	GO:0031726~CCR1 chemokine receptor binding	2	1.5873	1.44964	0.0355104	CCL7, CCL5	114	6	18811	55.0029	0.999914	0.707477	0.699282
GOTERM_MF_DIRECT	GO:0031727~CCR2 chemokine receptor binding	2	1.5873	1.44964	0.0355104	CCL7, CCL2	114	6	18811	55.0029	0.999914	0.707477	0.699282
GOTERM_MF_DIRECT	GO:0005201~extracellular matrix structural constituent	4	3.1746	1.29668	0.0505028	SRPX, SPON1, LAMB3, TNC	114	138	18811	4.78286	0.999999	0.934301	0.923479
GOTERM_MF_DIRECT	GO:0005518~collagen binding	3	2.38095	1.20024	0.0630615	ADGRG1, C1QTNF1, CTSS	114	68	18811	7.2798	1	1	0.992248
GOTERM_MF_DIRECT	GO:0016004~phospholipase activator activity	2	1.5873	1.19283	0.0641455	CCL8, CCL5	114	11	18811	30.0016	1	1	0.992248
GOTERM_MF_DIRECT	GO:0008083~growth factor activity	4	3.1746	1.10564	0.0784079	CSF3, GMFG, CXCL1, INHBE	114	166	18811	3.97611	1	1	0.992248
GOTERM_MF_DIRECT	GO:0004672~protein kinase activity	6	4.7619	1.10551	0.0784321	CCL8, NUAK2, MMD, CCL5, CCL2, TRIB3	114	379	18811	2.61228	1	1	0.992248
GOTERM_MF_DIRECT	GO:0004175~endopeptidase activity	3	2.38095	1.01618	0.0963434	MMP1, MMP3, CTSH	114	87	18811	5.68996	1	1	0.992248

## Sheet: UP DEGs_GO_CC
Table S4. GO enrichment analysis for the 126 upregulated DEGs based on the category Cellular Component
Category	Term	Count	%	log10(p-value)	PValue	Genes	List Total	Pop Hits	Pop Total	Fold Enrichment	Bonferroni	Benjamini	FDR
GOTERM_CC_DIRECT	GO:0000786~nucleosome	12	9.52381	9.39162	4.05868e-10	H2AC11, H2AC13, H2BC15, H3C11, H2BC10, H2AC4, H3C12, H2AC21, H2BC4, H3C2, H2AC16, H2AC17	117	139	20472	15.1057	7.26504e-08	7.26504e-08	7.22445e-08
GOTERM_CC_DIRECT	GO:0005576~extracellular region	35	27.7778	7.8772	1.32678e-08	CXCL6, CSF3, ADAMDEC1, CXCL8, TNFAIP6, LAMC3, GMFG, LOXL3, TNC, CXCL1, CXCL3, CXCL5, CTSS, IL4I1, ADGRG1, C1QTNF1, CCL7, CCL5, H3C11, H3C12, CCL2, CTSH, ARSI, APOE, H3C2, PLTP, CD163, LAMB3, MMP1, MMP3, GTPBP2, TNFRSF1B, TUBA4A, INHBE, FIBIN	117	2127	20472	2.87922	2.37492e-06	1.18746e-06	1.18083e-06
GOTERM_CC_DIRECT	GO:0005615~extracellular space	28	22.2222	5.07917	8.33351e-06	CXCL6, CSF3, IL1RN, SPON1, CD40, CXCL8, TNFAIP6, LOXL3, TNC, AKR1B1, CXCL1, CXCL3, CXCL5, CTSS, C1QTNF1, CCL8, CCL7, CCL5, CCL2, CTSH, APOE, PLTP, PF4V1, IL32, MMP3, H2BC4, INHBE, H2BC10	117	1936	20472	2.53062	0.00149059	0.000497233	0.000494455
GOTERM_CC_DIRECT	GO:0070062~extracellular exosome	26	20.6349	3.23889	0.000576919	IL1RN, CD40, CD82, QPRT, AKR1B1, H2AC16, H2AC17, H2AC11, ADGRG1, H2AC13, BASP1, H3C11, H3C12, CTSH, CPNE2, APOE, H3C2, H2AC4, H2BC4, TMEM132A, TUBA4A, H2BC15, MLPH, H2BC10, H2AC21, GPRC5C	117	2218	20472	2.0511	0.098142	0.0258171	0.0256729
GOTERM_CC_DIRECT	GO:1904724~tertiary granule lumen	4	3.1746	2.42559	0.00375326	TNFAIP6, CTSH, CXCL1, CTSS	117	55	20472	12.7254	0.489874	0.134367	0.133616
GOTERM_CC_DIRECT	GO:0043025~neuronal cell body	8	6.34921	2.06911	0.00852877	NQO1, CD40, SV2A, PTPRN, ADORA1, SLC1A3, APOE, TNFRSF1B	117	407	20472	3.4393	0.784156	0.254442	0.25302
GOTERM_CC_DIRECT	GO:0005887~integral component of plasma membrane	17	13.4921	1.9588	0.0109952	HS3ST3B1, SLC22A4, CD163, RAMP2, CD40, CD82, MMD, KCNJ15, SLC1A3, PCDHGA11, ADGRG1, C1QTNF1, TSPAN18, ADORA1, GPRC5C, PCDHAC2, TNFRSF21	117	1508	20472	1.97252	0.861797	0.281162	0.279591
GOTERM_CC_DIRECT	GO:0005788~endoplasmic reticulum lumen	6	4.7619	1.51902	0.0302674	SPON1, TMEM132A, TNC, ARSI, APOE, CES1	117	306	20472	3.43087	0.99592	0.666873	0.663148
GOTERM_CC_DIRECT	GO:1904813~ficolin-1-rich granule lumen	4	3.1746	1.47457	0.0335299	TNFAIP6, GMFG, CTSH, CTSS	117	124	20472	5.64433	0.997768	0.666873	0.663148
GOTERM_CC_DIRECT	GO:0031012~extracellular matrix	5	3.96825	1.22241	0.0599232	SPON1, MMP1, LAMC3, MMP3, APOE	117	259	20472	3.37788	0.999984	0.825096	0.820487
