# Supplementary material for: RNA-Seq of Dermal Fibroblasts from Patients with Hypermobile Ehlers–Danlos Syndrome and Hypermobility Spectrum Disorders Supports Their Categorization as a Single Entity with Involvement of Extracellular Matrix Degrading and Proinflammatory Pathomechanisms
Source: Cells. 2022 Dec 14;11(24):4040. doi: 10.3390/cells11244040 (PMC9777098; doi:10.3390/cells11244040)
Supplement: Supplementary file 1 [file cells-11-04040-s001.zip › Supplementary materials/Table S5.xls]

## Sheet: ClueGO Results
Supplementary Table S5:ClueGO network analysis on the 952 DEGs identified in hEDS/HSD patient cells
ID	Term	Ontology Source	Term p-value	Term p-value Corrected with Benjamini-Hochberg	Group p-value	Group p-value Corrected with Benjamini-Hochberg	GOGroups	% Associated Genes	Nr. Genes	Cluster	Genes Cluster #1 (126 upregulated DEGs)	Genes Cluster #2 (826 downregulated DEGs)	%Genes Cluster #1	%Genes Cluster #2	%Genes Cluster #1.adjusted.to.input.list.size	%Genes Cluster #2.adjusted.to.input.list.size	Associated Genes Found
R-HSA:5663202	Diseases of signal transduction by growth factor receptors and second messengers	REACTOME_Pathways_25.05.2022	0.00255536	0.0026641	0.00255536	0.00271507	Group1	7.3903	32	Specific for Cluster #2	[]	[ADAM10, AKAP9, AP3B1, APC, BIRC6, CEP43, EML4, EP300, ERLEC1, FOXO1, FRS2, FZD4, FZD6, FZD8, GOLGB1, HES1, KDM7A, KIF5B, LMO7, LRRFIP1, MAMLD1, MDM2, MPRIP, NR4A1, PIK3CA, PIK3R2, PPP1CC, PTPN12, TGFBR1, TNKS, TPR, TRIP11]	0	100	0	100	[ADAM10, AKAP9, AP3B1, APC, BIRC6, CEP43, EML4, EP300, ERLEC1, FOXO1, FRS2, FZD4, FZD6, FZD8, GOLGB1, HES1, KDM7A, KIF5B, LMO7, LRRFIP1, MAMLD1, MDM2, MPRIP, NR4A1, PIK3CA, PIK3R2, PPP1CC, PTPN12, TGFBR1, TNKS, TPR, TRIP11]
R-HSA:9012999	RHO GTPase cycle	REACTOME_Pathways_25.05.2022	1.66052e-07	1.16236e-06	1.66052e-07	9.40959e-07	Group02	10.0223	45	Specific for Cluster #2	[ARAP3, ARHGEF19, BASP1, IL32, VANGL2]	[ADD3, AKAP12, ARHGAP12, ARHGAP20, ARHGAP5, BAIAP2L1, CHN2, DAAM1, DIAPH3, DOCK11, DOCK7, DOCK9, DSP, DST, FERMT2, FNBP1L, FRS2, LRRC1, MOSPD2, NGEF, PDE5A, PEAK1, PGRMC2, PIK3CA, PIK3R2, PLEKHG3, PTK2B, RALGAPA1, RHOB, RHOJ, RHPN2, SH3RF1, SPTAN1, SRRM1, STAM, STK38, SYDE2, TFRC, UACA, WIPF1]	11.1111	88.8889	17.0788	82.9212	[ADD3, AKAP12, ARAP3, ARHGAP12, ARHGAP20, ARHGAP5, ARHGEF19, BAIAP2L1, BASP1, CHN2, DAAM1, DIAPH3, DOCK11, DOCK7, DOCK9, DSP, DST, FERMT2, FNBP1L, FRS2, IL32, LRRC1, MOSPD2, NGEF, PDE5A, PEAK1, PGRMC2, PIK3CA, PIK3R2, PLEKHG3, PTK2B, RALGAPA1, RHOB, RHOJ, RHPN2, SH3RF1, SPTAN1, SRRM1, STAM, STK38, SYDE2, TFRC, UACA, VANGL2, WIPF1]
WP:3888	VEGFA-VEGFR2 signaling pathway	WikiPathways_23.02.2022	0.00175631	0.0019559	0.00175631	0.00199049	Group03	7.51708	33	Specific for Cluster #2	[CCL2, CXCL8]	[ADAM10, ADAM9, CACNA2D1, CCN2, CTNNA1, DNAJB4, EEA1, EPRS1, FHL2, FOXO1, FRS2, GIGYF2, IGFBP7, ITGB5, MAP2K3, MDM2, NAP1L1, NCL, NEXN, NR4A1, NR4A2, PIK3CA, PIK3R2, PTK2B, RBM39, RHOJ, SRP54, STAM, TNFRSF25, TNXB, TRPC1]	6.06061	93.9394	9.60896	90.391	[ADAM10, ADAM9, CACNA2D1, CCL2, CCN2, CTNNA1, CXCL8, DNAJB4, EEA1, EPRS1, FHL2, FOXO1, FRS2, GIGYF2, IGFBP7, ITGB5, MAP2K3, MDM2, NAP1L1, NCL, NEXN, NR4A1, NR4A2, PIK3CA, PIK3R2, PTK2B, RBM39, RHOJ, SRP54, STAM, TNFRSF25, TNXB, TRPC1]
GO:0016055	Wnt signaling pathway	GO_BiologicalProcess-EBI-UniProt-GOA-ACAP-ARAP_25.05.2022_00h00	5.04218e-06	1.54417e-05	5.04218e-06	1.07146e-05	Group04	9.01468	43	Specific for Cluster #2	[APOE, ARHGEF19, MDFI, SALL1, VANGL2]	[APC, AXIN2, CDC73, CMAHP, CTR9, DAAM1, FERMT2, FOXO1, FZD4, FZD6, FZD8, GRK5, JADE1, KLF4, LEO1, LRP1, LRRK2, MACF1, MAGI2, NCOA3, NR4A2, PKD2, RECK, ROR1, SEMA5A, SNX3, SULF1, SULF2, TLE1, TMEM131L, TNKS, TRPM4, TTC21B, UBE2B, WNK1, WNT2, WNT2B, WNT4]	11.6279	88.3721	17.8176	82.1824	[APC, APOE, ARHGEF19, AXIN2, CDC73, CMAHP, CTR9, DAAM1, FERMT2, FOXO1, FZD4, FZD6, FZD8, GRK5, JADE1, KLF4, LEO1, LRP1, LRRK2, MACF1, MAGI2, MDFI, NCOA3, NR4A2, PKD2, RECK, ROR1, SALL1, SEMA5A, SNX3, SULF1, SULF2, TLE1, TMEM131L, TNKS, TRPM4, TTC21B, UBE2B, VANGL2, WNK1, WNT2, WNT2B, WNT4]
GO:0030198	extracellular matrix organization	GO_BiologicalProcess-EBI-UniProt-GOA-ACAP-ARAP_25.05.2022_00h00	2.75495e-07	1.68741e-06	2.75495e-07	1.17086e-06	Group05	10.7558	37	Specific for Cluster #2	[CTSS, LAMB3, LOXL3, MMP1, MMP3, RAMP2, TNFRSF1B, WASHC1]	[ADAM10, ADAMTSL1, CCDC80, CCN2, COL14A1, COMP, DMTF1, FOXC2, HSD17B12, KAZALD1, LOX, LRP1, LTBP3, MYO1E, NTN4, PHLDB2, POSTN, PTPRQ, RB1, RECK, SERAC1, ST7, SULF1, SULF2, TGFBR1, THSD4, TNXA, TNXB, VTN]	21.6216	78.3784	31.2499	68.7501	[ADAM10, ADAMTSL1, CCDC80, CCN2, COL14A1, COMP, CTSS, DMTF1, FOXC2, HSD17B12, KAZALD1, LAMB3, LOX, LOXL3, LRP1, LTBP3, MMP1, MMP3, MYO1E, NTN4, PHLDB2, POSTN, PTPRQ, RAMP2, RB1, RECK, SERAC1, ST7, SULF1, SULF2, TGFBR1, THSD4, TNFRSF1B, TNXA, TNXB, VTN, WASHC1]
GO:0040017	positive regulation of locomotion	GO_BiologicalProcess-EBI-UniProt-GOA-ACAP-ARAP_25.05.2022_00h00	5.02413e-06	1.64121e-05	5.02413e-06	1.22014e-05	Group06	8.42975	51	Specific for Cluster #2	[CCL5, CCL7, CCL8, CD40, CTSH, CXCL8, TNFAIP6, WASHC1]	[ADAM10, ADAM9, AKAP12, ANXA3, APC, BMP4, BMPR2, CARMIL1, CEMIP, CEP43, CNOT6, DOCK7, F2R, FERMT2, FOXC2, FYCO1, FZD4, IGFBP5, MAP2K3, MCU, MGAT5, MOSPD2, MYO1E, NEDD9, PLK2, PTK2B, PTP4A1, RHOB, RHOJ, RUFY3, SEMA3C, SEMA4A, SEMA5A, SNAI1, STK39, TEK, TGFBR1, TJP1, TNFSF18, VTN, WNK1, XG, XGY2]	15.6863	84.3137	23.4627	76.5373	[ADAM10, ADAM9, AKAP12, ANXA3, APC, BMP4, BMPR2, CARMIL1, CCL5, CCL7, CCL8, CD40, CEMIP, CEP43, CNOT6, CTSH, CXCL8, DOCK7, F2R, FERMT2, FOXC2, FYCO1, FZD4, IGFBP5, MAP2K3, MCU, MGAT5, MOSPD2, MYO1E, NEDD9, PLK2, PTK2B, PTP4A1, RHOB, RHOJ, RUFY3, SEMA3C, SEMA4A, SEMA5A, SNAI1, STK39, TEK, TGFBR1, TJP1, TNFAIP6, TNFSF18, VTN, WASHC1, WNK1, XG, XGY2]
GO:0030335	positive regulation of cell migration	GO_BiologicalProcess-EBI-UniProt-GOA-ACAP-ARAP_25.05.2022_00h00	1.2844e-06	4.84121e-06	5.02413e-06	1.22014e-05	Group06	8.86525	50	Specific for Cluster #2	[CCL5, CCL7, CCL8, CD40, CTSH, CXCL8, TNFAIP6, WASHC1]	[ADAM10, ADAM9, AKAP12, ANXA3, APC, BMP4, BMPR2, CARMIL1, CEMIP, CEP43, DOCK7, F2R, FERMT2, FOXC2, FYCO1, FZD4, IGFBP5, MAP2K3, MCU, MGAT5, MOSPD2, MYO1E, NEDD9, PLK2, PTK2B, PTP4A1, RHOB, RHOJ, RUFY3, SEMA3C, SEMA4A, SEMA5A, SNAI1, STK39, TEK, TGFBR1, TJP1, TNFSF18, VTN, WNK1, XG, XGY2]	16	84	23.8879	76.1121	[ADAM10, ADAM9, AKAP12, ANXA3, APC, BMP4, BMPR2, CARMIL1, CCL5, CCL7, CCL8, CD40, CEMIP, CEP43, CTSH, CXCL8, DOCK7, F2R, FERMT2, FOXC2, FYCO1, FZD4, IGFBP5, MAP2K3, MCU, MGAT5, MOSPD2, MYO1E, NEDD9, PLK2, PTK2B, PTP4A1, RHOB, RHOJ, RUFY3, SEMA3C, SEMA4A, SEMA5A, SNAI1, STK39, TEK, TGFBR1, TJP1, TNFAIP6, TNFSF18, VTN, WASHC1, WNK1, XG, XGY2]
GO:0001654	eye development	GO_BiologicalProcess-EBI-UniProt-GOA-ACAP-ARAP_25.05.2022_00h00	0.000361846	0.000591015	0.000361846	0.000473183	Group07	8.09524	34	Specific for Cluster #2	[LAMC3, PRDM1]	[AHI1, BMP4, BMP6, BMPR2, CLIC4, CRYGS, EFEMP1, FAT1, FOXC2, FRS2, FZD4, HES1, HMGN1, KLF4, MAF, MAN2A1, MEIS2, OSR2, PITX2, RAB3GAP1, RARA, RDH10, RHOJ, RPGRIP1L, SKIL, TENM3, TENT2, TGFBR1, USP45, WNT2, WNT2B, ZEB1]	5.88235	94.1176	9.33671	90.6633	[AHI1, BMP4, BMP6, BMPR2, CLIC4, CRYGS, EFEMP1, FAT1, FOXC2, FRS2, FZD4, HES1, HMGN1, KLF4, LAMC3, MAF, MAN2A1, MEIS2, OSR2, PITX2, PRDM1, RAB3GAP1, RARA, RDH10, RHOJ, RPGRIP1L, SKIL, TENM3, TENT2, TGFBR1, USP45, WNT2, WNT2B, ZEB1]
GO:0043010	camera-type eye development	GO_BiologicalProcess-EBI-UniProt-GOA-ACAP-ARAP_25.05.2022_00h00	0.000381128	0.000602428	0.000361846	0.000473183	Group07	8.37838	31	Specific for Cluster #2	[LAMC3]	[AHI1, BMP4, BMPR2, CLIC4, CRYGS, EFEMP1, FAT1, FOXC2, FRS2, FZD4, HES1, HMGN1, KLF4, MAF, MAN2A1, OSR2, PITX2, RAB3GAP1, RARA, RDH10, RHOJ, RPGRIP1L, SKIL, TENM3, TENT2, TGFBR1, USP45, WNT2, WNT2B, ZEB1]	3.22581	96.7742	5.20643	94.7936	[AHI1, BMP4, BMPR2, CLIC4, CRYGS, EFEMP1, FAT1, FOXC2, FRS2, FZD4, HES1, HMGN1, KLF4, LAMC3, MAF, MAN2A1, OSR2, PITX2, RAB3GAP1, RARA, RDH10, RHOJ, RPGRIP1L, SKIL, TENM3, TENT2, TGFBR1, USP45, WNT2, WNT2B, ZEB1]
GO:0050839	cell adhesion molecule binding	GO_MolecularFunction-EBI-UniProt-GOA-ACAP-ARAP_25.05.2022_00h00	2.82121e-07	1.53599e-06	2.82121e-07	9.59211e-07	Group08	9.0301	54	Specific for Cluster #2	[CIB2, EMP2, H3C11, H3C12, H3C2]	[ADAM10, ADAM9, APC, BAIAP2L1, BMPR2, CALD1, CCN2, CD9, CDH10, CDH6, COMP, CTNNA1, DIAPH3, DMD, DMTF1, DOCK9, DSP, DST, EPS8L2, ERC1, FERMT2, FNBP1L, GIGYF2, GPRC5A, ITGB5, ITGBL1, KIF5B, LAMA3, LRRFIP1, MACF1, MFGE8, MPRIP, NEXN, PDLIM5, PHLDB2, PLEC, POSTN, PTPRF, RPL6, SNX9, SPTAN1, STK38, TBC1D2, TENM3, TJP1, TNXB, TRPC4, UTRN, VTN]	9.25926	90.7407	14.3934	85.6066	[ADAM10, ADAM9, APC, BAIAP2L1, BMPR2, CALD1, CCN2, CD9, CDH10, CDH6, CIB2, COMP, CTNNA1, DIAPH3, DMD, DMTF1, DOCK9, DSP, DST, EMP2, EPS8L2, ERC1, FERMT2, FNBP1L, GIGYF2, GPRC5A, H3C11, H3C12, H3C2, ITGB5, ITGBL1, KIF5B, LAMA3, LRRFIP1, MACF1, MFGE8, MPRIP, NEXN, PDLIM5, PHLDB2, PLEC, POSTN, PTPRF, RPL6, SNX9, SPTAN1, STK38, TBC1D2, TENM3, TJP1, TNXB, TRPC4, UTRN, VTN]
GO:0045296	cadherin binding	GO_MolecularFunction-EBI-UniProt-GOA-ACAP-ARAP_25.05.2022_00h00	0.000191594	0.000347707	2.82121e-07	9.59211e-07	Group08	8.65922	31	Specific for Cluster #2	[H3C11, H3C12, H3C2]	[APC, BAIAP2L1, BMPR2, CALD1, CDH10, CDH6, CTNNA1, DIAPH3, DOCK9, EPS8L2, ERC1, FNBP1L, GIGYF2, GPRC5A, KIF5B, LRRFIP1, MACF1, MPRIP, PDLIM5, PHLDB2, PLEC, RPL6, SNX9, SPTAN1, STK38, TBC1D2, TJP1, TRPC4]	9.67742	90.3226	15.0051	84.9949	[APC, BAIAP2L1, BMPR2, CALD1, CDH10, CDH6, CTNNA1, DIAPH3, DOCK9, EPS8L2, ERC1, FNBP1L, GIGYF2, GPRC5A, H3C11, H3C12, H3C2, KIF5B, LRRFIP1, MACF1, MPRIP, PDLIM5, PHLDB2, PLEC, RPL6, SNX9, SPTAN1, STK38, TBC1D2, TJP1, TRPC4]
GO:0051093	negative regulation of developmental process	GO_BiologicalProcess-EBI-UniProt-GOA-ACAP-ARAP_25.05.2022_00h00	4.47827e-07	2.19435e-06	4.47827e-07	1.26884e-06	Group09	7.7621	77	Specific for Cluster #2	[LOXL3, TMEM176B, TNFAIP6, TRIB3, WWC1]	[ABCA5, ARID4B, AXIN2, BMP4, BMPR2, CDC73, CDK13, CDKN2A, CRIM1, CTNNA1, CTR9, DICER1, DMD, EFEMP1, FERMT2, FGL2, FOXC2, FOXO1, FRS2, FSTL3, FYCO1, HES1, HSPG2, ID4, IGFBP5, KLF2, KLF4, LEO1, LTBP3, MBP, MEIS2, METAP2, METTL14, MGARP, N4BP2L2, NFIB, NGEF, OSR1, PDCD4, PI16, PLK2, PTK2B, RARA, RB1, RGS2, RPS6KA6, RUFY3, SEMA3C, SEMA4A, SEMA5A, SKIL, SLC12A2, SMAD1, SNAI1, SORT1, SPART, SRGN, SS18,…	6.49351	93.5065	10.2676	89.7324	[ABCA5, ARID4B, AXIN2, BMP4, BMPR2, CDC73, CDK13, CDKN2A, CRIM1, CTNNA1, CTR9, DICER1, DMD, EFEMP1, FERMT2, FGL2, FOXC2, FOXO1, FRS2, FSTL3, FYCO1, HES1, HSPG2, ID4, IGFBP5, KLF2, KLF4, LEO1, LOXL3, LTBP3, MBP, MEIS2, METAP2, METTL14, MGARP, N4BP2L2, NFIB, NGEF, OSR1, PDCD4, PI16, PLK2, PTK2B, RARA, RB1, RGS2, RPS6KA6, RUFY3, SEMA3C, SEMA4A, SEMA5A, SKIL, SLC12A2, SMAD1, SNAI1, SORT1, SPART, SRGN…
GO:0045596	negative regulation of cell differentiation	GO_BiologicalProcess-EBI-UniProt-GOA-ACAP-ARAP_25.05.2022_00h00	2.37149e-06	8.30022e-06	4.47827e-07	1.26884e-06	Group09	8.11554	59	Specific for Cluster #2	[LOXL3, TMEM176B, TNFAIP6, TRIB3]	[ABCA5, AXIN2, BMP4, BMPR2, CDC73, CDK13, CDKN2A, CRIM1, CTNNA1, CTR9, DICER1, DMD, EFEMP1, FERMT2, FGL2, FOXO1, FRS2, FSTL3, FYCO1, HES1, ID4, IGFBP5, LEO1, LTBP3, MBP, MEIS2, METAP2, METTL14, N4BP2L2, OSR1, PDCD4, PI16, PTK2B, RARA, RB1, RGS2, RUFY3, SEMA3C, SEMA4A, SEMA5A, SKIL, SMAD1, SNAI1, SORT1, SPART, SS18, TGFBR1, TMEM131L, TNFSF18, TP53INP1, TRPM4, WNT4, YBX1, ZEB1, ZFP36]	6.77966	93.2203	10.701	89.299	[ABCA5, AXIN2, BMP4, BMPR2, CDC73, CDK13, CDKN2A, CRIM1, CTNNA1, CTR9, DICER1, DMD, EFEMP1, FERMT2, FGL2, FOXO1, FRS2, FSTL3, FYCO1, HES1, ID4, IGFBP5, LEO1, LOXL3, LTBP3, MBP, MEIS2, METAP2, METTL14, N4BP2L2, OSR1, PDCD4, PI16, PTK2B, RARA, RB1, RGS2, RUFY3, SEMA3C, SEMA4A, SEMA5A, SKIL, SMAD1, SNAI1, SORT1, SPART, SS18, TGFBR1, TMEM131L, TMEM176B, TNFAIP6, TNFSF18, TP53INP1, TRIB3, TRPM4, WNT4,…
GO:0061061	muscle structure development	GO_BiologicalProcess-EBI-UniProt-GOA-ACAP-ARAP_25.05.2022_00h00	4.96562e-05	0.000115864	4.96562e-05	8.44155e-05	Group010	7.64791	53	Specific for Cluster #2	[BASP1, RAMP2]	[ADARB1, AKAP6, ANKRD1, ATF3, BMP4, BMPR2, BTBD1, BTG2, CACNB4, CAPN3, CD9, COMP, DDX5, DMD, DPF3, DSP, EP300, EVC, FHL2, FOS, FOXC2, FRS2, HES1, IGFBP5, KRT19, LOX, MDM2, MYEF2, NR4A1, PAXBP1, PBRM1, PDCD4, PDLIM5, PI16, PLEC, RARA, RB1, RGS2, SGCB, SIK1, SMAD1, SORT1, SYNE1, TGFBR1, UTRN, WNT2, WNT4, YBX1, ZEB1, ZFHX3, ZMPSTE24]	3.77358	96.2264	6.06945	93.9305	[ADARB1, AKAP6, ANKRD1, ATF3, BASP1, BMP4, BMPR2, BTBD1, BTG2, CACNB4, CAPN3, CD9, COMP, DDX5, DMD, DPF3, DSP, EP300, EVC, FHL2, FOS, FOXC2, FRS2, HES1, IGFBP5, KRT19, LOX, MDM2, MYEF2, NR4A1, PAXBP1, PBRM1, PDCD4, PDLIM5, PI16, PLEC, RAMP2, RARA, RB1, RGS2, SGCB, SIK1, SMAD1, SORT1, SYNE1, TGFBR1, UTRN, WNT2, WNT4, YBX1, ZEB1, ZFHX3, ZMPSTE24]
GO:0042692	muscle cell differentiation	GO_BiologicalProcess-EBI-UniProt-GOA-ACAP-ARAP_25.05.2022_00h00	0.000151055	0.000296069	4.96562e-05	8.44155e-05	Group010	8.4788	34	Specific for Cluster #2	[RAMP2]	[AKAP6, ANKRD1, BMP4, BMPR2, CACNB4, CAPN3, CD9, COMP, DMD, FHL2, FRS2, HES1, IGFBP5, KRT19, LOX, MDM2, MYEF2, PDCD4, PDLIM5, PI16, PLEC, RARA, RB1, RGS2, SGCB, SIK1, SMAD1, SORT1, SYNE1, WNT4, YBX1, ZEB1, ZMPSTE24]	2.94118	97.0588	4.75563	95.2444	[AKAP6, ANKRD1, BMP4, BMPR2, CACNB4, CAPN3, CD9, COMP, DMD, FHL2, FRS2, HES1, IGFBP5, KRT19, LOX, MDM2, MYEF2, PDCD4, PDLIM5, PI16, PLEC, RAMP2, RARA, RB1, RGS2, SGCB, SIK1, SMAD1, SORT1, SYNE1, WNT4, YBX1, ZEB1, ZMPSTE24]
GO:0001655	urogenital system development	GO_BiologicalProcess-EBI-UniProt-GOA-ACAP-ARAP_25.05.2022_00h00	2.04151e-09	5.00169e-08	2.04151e-09	1.73528e-08	Group11	11.4504	45	Specific for Cluster #2	[AKR1B1, ARG2, BASP1, CTSH, CYP7B1, HS3ST3B1, PRDM1, SALL1, TNC, VANGL2]	[AHI1, BMP4, BMP6, C1GALT1, CPLANE1, CRLF1, DYNC2H1, FMN1, FOXC2, FRAS1, FRS2, GCNT1, GCNT4, GDF6, GLIS2, HES1, ID4, LRRK2, MAGI2, MYO1E, NFIA, OSR1, OSR2, PKD2, RARA, RDH10, RPGRIP1L, SMAD1, SULF1, SULF2, TEK, TGFBR1, WNT2B, WNT4, ZMPSTE24]	22.2222	77.7778	32.0087	67.9913	[AHI1, AKR1B1, ARG2, BASP1, BMP4, BMP6, C1GALT1, CPLANE1, CRLF1, CTSH, CYP7B1, DYNC2H1, FMN1, FOXC2, FRAS1, FRS2, GCNT1, GCNT4, GDF6, GLIS2, HES1, HS3ST3B1, ID4, LRRK2, MAGI2, MYO1E, NFIA, OSR1, OSR2, PKD2, PRDM1, RARA, RDH10, RPGRIP1L, SALL1, SMAD1, SULF1, SULF2, TEK, TGFBR1, TNC, VANGL2, WNT2B, WNT4, ZMPSTE24]
GO:0072001	renal system development	GO_BiologicalProcess-EBI-UniProt-GOA-ACAP-ARAP_25.05.2022_00h00	3.04691e-09	4.97661e-08	2.04151e-09	1.73528e-08	Group11	11.9534	41	Specific for Cluster #2	[AKR1B1, ARG2, BASP1, CTSH, HS3ST3B1, PRDM1, SALL1, VANGL2]	[AHI1, BMP4, BMP6, C1GALT1, CPLANE1, CRLF1, DYNC2H1, FMN1, FOXC2, FRAS1, GCNT1, GCNT4, GDF6, GLIS2, HES1, LRRK2, MAGI2, MYO1E, NFIA, OSR1, OSR2, PKD2, RARA, RDH10, RPGRIP1L, SMAD1, SULF1, SULF2, TEK, TGFBR1, WNT2B, WNT4, ZMPSTE24]	19.5122	80.4878	28.5432	71.4568	[AHI1, AKR1B1, ARG2, BASP1, BMP4, BMP6, C1GALT1, CPLANE1, CRLF1, CTSH, DYNC2H1, FMN1, FOXC2, FRAS1, GCNT1, GCNT4, GDF6, GLIS2, HES1, HS3ST3B1, LRRK2, MAGI2, MYO1E, NFIA, OSR1, OSR2, PKD2, PRDM1, RARA, RDH10, RPGRIP1L, SALL1, SMAD1, SULF1, SULF2, TEK, TGFBR1, VANGL2, WNT2B, WNT4, ZMPSTE24]
GO:0031344	regulation of cell projection organization	GO_BiologicalProcess-EBI-UniProt-GOA-ACAP-ARAP_25.05.2022_00h00	0.000120072	0.000245146	0.000120072	0.000185565	Group12	7.35695	54	Specific for Cluster #2	[APOE, WASHC1]	[APC, ATP8B1, BMPR2, CARMIL1, DMD, DOCK11, EP300, EPS8L2, FBXO38, FNBP1L, FYCO1, FZD4, HECW2, HES1, HTT, INTU, KLF4, LRRK2, MACF1, MAGI2, MBP, METAP2, MGARP, NEDD9, NEGR1, NGEF, ODF2L, PAQR3, PDLIM5, PIK3CA, PLXNA2, PMP22, PTK2B, PTPRF, RGS2, ROR1, RUFY3, SEMA3C, SEMA4A, SEMA5A, SETX, SIPA1L1, SKIL, SNX3, SPART, TBC1D2, TBC1D3, TENM3, TGFBR1, TMEM106B, USP17L2, VDAC3]	3.7037	96.2963	5.95968	94.0403	[APC, APOE, ATP8B1, BMPR2, CARMIL1, DMD, DOCK11, EP300, EPS8L2, FBXO38, FNBP1L, FYCO1, FZD4, HECW2, HES1, HTT, INTU, KLF4, LRRK2, MACF1, MAGI2, MBP, METAP2, MGARP, NEDD9, NEGR1, NGEF, ODF2L, PAQR3, PDLIM5, PIK3CA, PLXNA2, PMP22, PTK2B, PTPRF, RGS2, ROR1, RUFY3, SEMA3C, SEMA4A, SEMA5A, SETX, SIPA1L1, SKIL, SNX3, SPART, TBC1D2, TBC1D3, TENM3, TGFBR1, TMEM106B, USP17L2, VDAC3, WASHC1]
GO:0031346	positive regulation of cell projection organization	GO_BiologicalProcess-EBI-UniProt-GOA-ACAP-ARAP_25.05.2022_00h00	0.000677037	0.000947852	0.000120072	0.000185565	Group12	8.24468	31	Specific for Cluster #2	[APOE, WASHC1]	[APC, BMPR2, CARMIL1, DMD, DOCK11, EP300, EPS8L2, FBXO38, FNBP1L, FYCO1, FZD4, HTT, MACF1, MAGI2, NEDD9, NEGR1, PIK3CA, PLXNA2, PTK2B, RGS2, ROR1, RUFY3, SEMA5A, SETX, SKIL, SNX3, TENM3, TGFBR1, TMEM106B]	6.45161	93.5484	10.204	89.796	[APC, APOE, BMPR2, CARMIL1, DMD, DOCK11, EP300, EPS8L2, FBXO38, FNBP1L, FYCO1, FZD4, HTT, MACF1, MAGI2, NEDD9, NEGR1, PIK3CA, PLXNA2, PTK2B, RGS2, ROR1, RUFY3, SEMA5A, SETX, SKIL, SNX3, TENM3, TGFBR1, TMEM106B, WASHC1]
GO:0010975	regulation of neuron projection development	GO_BiologicalProcess-EBI-UniProt-GOA-ACAP-ARAP_25.05.2022_00h00	0.00113898	0.00146869	0.000120072	0.000185565	Group12	7.59494	36	Specific for Cluster #2	[APOE]	[BMPR2, DMD, EP300, FBXO38, FYCO1, HECW2, HES1, KLF4, LRRK2, MACF1, MAGI2, MBP, METAP2, MGARP, NEGR1, NGEF, PAQR3, PDLIM5, PLXNA2, PMP22, PTK2B, PTPRF, RGS2, ROR1, RUFY3, SEMA3C, SEMA4A, SEMA5A, SETX, SIPA1L1, SKIL, SNX3, SPART, TENM3, TMEM106B]	2.77778	97.2222	4.4961	95.5039	[APOE, BMPR2, DMD, EP300, FBXO38, FYCO1, HECW2, HES1, KLF4, LRRK2, MACF1, MAGI2, MBP, METAP2, MGARP, NEGR1, NGEF, PAQR3, PDLIM5, PLXNA2, PMP22, PTK2B, PTPRF, RGS2, ROR1, RUFY3, SEMA3C, SEMA4A, SEMA5A, SETX, SIPA1L1, SKIL, SNX3, SPART, TENM3, TMEM106B]
GO:0061448	connective tissue development	GO_BiologicalProcess-EBI-UniProt-GOA-ACAP-ARAP_25.05.2022_00h00	1.62965e-08	1.59706e-07	6.61603e-06	1.24969e-05	Group13	12.2034	36	Specific for Cluster #2	[DGAT2]	[ARRDC3, AXIN2, BMP4, BMP6, BMPR2, CCN2, COMP, EFEMP1, EVC, FOXC2, GDF6, ID4, LNPK, LOX, LTBP3, MAF, NFIB, OSR1, OSR2, PGRMC2, PIK3CA, PKDCC, RARA, RB1, SMAD1, SNAI1, SPART, SULF1, SULF2, TGFBR1, TRIP11, TRPM4, WNT2B, ZEB1, ZMPSTE24]	2.77778	97.2222	4.4961	95.5039	[ARRDC3, AXIN2, BMP4, BMP6, BMPR2, CCN2, COMP, DGAT2, EFEMP1, EVC, FOXC2, GDF6, ID4, LNPK, LOX, LTBP3, MAF, NFIB, OSR1, OSR2, PGRMC2, PIK3CA, PKDCC, RARA, RB1, SMAD1, SNAI1, SPART, SULF1, SULF2, TGFBR1, TRIP11, TRPM4, WNT2B, ZEB1, ZMPSTE24]
GO:0001501	skeletal system development	GO_BiologicalProcess-EBI-UniProt-GOA-ACAP-ARAP_25.05.2022_00h00	5.8314e-05	0.000129881	6.61603e-06	1.24969e-05	Group13	7.97227	46	Specific for Cluster #2	[MDFI, VDR]	[ACVR2A, ANKH, AXIN2, BMP4, BMP6, BMPR2, CCN2, COMP, CSRNP1, EFEMP1, EP300, EVC, FMN1, FOXC2, GDF6, HAPLN3, INSIG2, LNPK, LOX, LTBP3, MAF, MTHFD1L, NFIB, NPR3, OSR1, OSR2, PAPSS2, PITX2, PKDCC, PLS3, RARA, RASSF2, RB1, RDH10, SMAD1, SNAI1, SULF1, SULF2, TGFBR1, TRIP11, VCAN, WNT2B, ZEB1, ZMPSTE24]	4.34783	95.6522	6.96776	93.0322	[ACVR2A, ANKH, AXIN2, BMP4, BMP6, BMPR2, CCN2, COMP, CSRNP1, EFEMP1, EP300, EVC, FMN1, FOXC2, GDF6, HAPLN3, INSIG2, LNPK, LOX, LTBP3, MAF, MDFI, MTHFD1L, NFIB, NPR3, OSR1, OSR2, PAPSS2, PITX2, PKDCC, PLS3, RARA, RASSF2, RB1, RDH10, SMAD1, SNAI1, SULF1, SULF2, TGFBR1, TRIP11, VCAN, VDR, WNT2B, ZEB1, ZMPSTE24]
GO:0051216	cartilage development	GO_BiologicalProcess-EBI-UniProt-GOA-ACAP-ARAP_25.05.2022_00h00	6.80497e-07	3.03131e-06	6.61603e-06	1.24969e-05	Group13	12.4424	27	Specific for Cluster #2	[]	[AXIN2, BMP4, BMP6, BMPR2, CCN2, COMP, EFEMP1, EVC, GDF6, LNPK, LTBP3, MAF, NFIB, OSR1, OSR2, PKDCC, RARA, RB1, SMAD1, SNAI1, SULF1, SULF2, TGFBR1, TRIP11, WNT2B, ZEB1, ZMPSTE24]	0	100	0	100	[AXIN2, BMP4, BMP6, BMPR2, CCN2, COMP, EFEMP1, EVC, GDF6, LNPK, LTBP3, MAF, NFIB, OSR1, OSR2, PKDCC, RARA, RB1, SMAD1, SNAI1, SULF1, SULF2, TGFBR1, TRIP11, WNT2B, ZEB1, ZMPSTE24]
GO:0045786	negative regulation of cell cycle	GO_BiologicalProcess-EBI-UniProt-GOA-ACAP-ARAP_25.05.2022_00h00	0.00124381	0.0014865	0.000546298	0.000663362	Group14	7.74818	32	Specific for Cluster #2	[BARD1, CCL2]	[APC, ATRX, BMP4, BTG2, CACNB4, CDC5L, CDC73, CDKN2A, CENATAC, DONSON, DUSP1, ERCC6, GIGYF2, INTS3, JADE1, KLF4, MDM2, MUC1, NR4A1, PKD2, PLK2, PLK3, PSMG2, RAD17, RB1, RHOB, TAOK1, TNKS, TPR, YTHDC2]	6.25	93.75	9.89755	90.1024	[APC, ATRX, BARD1, BMP4, BTG2, CACNB4, CCL2, CDC5L, CDC73, CDKN2A, CENATAC, DONSON, DUSP1, ERCC6, GIGYF2, INTS3, JADE1, KLF4, MDM2, MUC1, NR4A1, PKD2, PLK2, PLK3, PSMG2, RAD17, RB1, RHOB, TAOK1, TNKS, TPR, YTHDC2]
GO:1901987	regulation of cell cycle phase transition	GO_BiologicalProcess-EBI-UniProt-GOA-ACAP-ARAP_25.05.2022_00h00	0.000831184	0.00110076	0.000546298	0.000663362	Group14	7.77778	35	Specific for Cluster #2	[BARD1, CCL2]	[APC, APPL1, CACNB4, CCNH, CDC5L, CDC73, CDKN2A, CUL4B, DONSON, DPF3, DUSP1, DYRK3, ERCC6, GIGYF2, HECW2, INTS3, JADE1, KLF4, MDM2, MUC1, NEK10, PBRM1, PKD2, PLK2, PLK3, PSMG2, RAD17, RB1, RIOK2, SASS6, TAOK1, TPR, USP17L2]	5.71429	94.2857	9.07947	90.9205	[APC, APPL1, BARD1, CACNB4, CCL2, CCNH, CDC5L, CDC73, CDKN2A, CUL4B, DONSON, DPF3, DUSP1, DYRK3, ERCC6, GIGYF2, HECW2, INTS3, JADE1, KLF4, MDM2, MUC1, NEK10, PBRM1, PKD2, PLK2, PLK3, PSMG2, RAD17, RB1, RIOK2, SASS6, TAOK1, TPR, USP17L2]
GO:1901990	regulation of mitotic cell cycle phase transition	GO_BiologicalProcess-EBI-UniProt-GOA-ACAP-ARAP_25.05.2022_00h00	0.000226661	0.000396657	0.000546298	0.000663362	Group14	8.72093	30	Specific for Cluster #2	[BARD1, CCL2]	[APC, APPL1, CACNB4, CCNH, CDC73, CDKN2A, CUL4B, DONSON, DPF3, DUSP1, GIGYF2, HECW2, INTS3, JADE1, KLF4, MDM2, MUC1, PBRM1, PKD2, PLK2, PLK3, PSMG2, RAD17, RB1, RIOK2, SASS6, TAOK1, TPR]	6.66667	93.3333	10.5301	89.4699	[APC, APPL1, BARD1, CACNB4, CCL2, CCNH, CDC73, CDKN2A, CUL4B, DONSON, DPF3, DUSP1, GIGYF2, HECW2, INTS3, JADE1, KLF4, MDM2, MUC1, PBRM1, PKD2, PLK2, PLK3, PSMG2, RAD17, RB1, RIOK2, SASS6, TAOK1, TPR]
KEGG:05322	Systemic lupus erythematosus	KEGG_25.05.2022	0.00211512	0.00225306	0.0776752	0.0776752	Group15	10.2941	14	Specific for Cluster #1	[CD40, H2AC11, H2AC13, H2AC16, H2AC17, H2AC21, H2AC4, H2BC10, H2BC15, H2BC4, H3C11, H3C12, H3C2]	[SSB]	92.8571	7.14286	95.5398	4.46024	[CD40, H2AC11, H2AC13, H2AC16, H2AC17, H2AC21, H2AC4, H2BC10, H2BC15, H2BC4, H3C11, H3C12, H3C2, SSB]
R-HSA:3214815	HDACs deacetylate histones	REACTOME_Pathways_25.05.2022	0.000181446	0.000341957	0.0776752	0.0776752	Group15	13.8298	13	Specific for Cluster #1	[H2AC11, H2AC13, H2AC16, H2AC17, H2AC21, H2AC4, H2BC10, H2BC15, H2BC4, H3C11, H3C12, H3C2]	[ARID4B]	92.3077	7.69231	95.186	4.81403	[ARID4B, H2AC11, H2AC13, H2AC16, H2AC17, H2AC21, H2AC4, H2BC10, H2BC15, H2BC4, H3C11, H3C12, H3C2]
R-HSA:3214847	HATs acetylate histones	REACTOME_Pathways_25.05.2022	0.00114958	0.00144434	0.0776752	0.0776752	Group15	10.5634	15	Specific for Cluster #1	[H2AC11, H2AC13, H2AC16, H2AC17, H2AC21, H2AC4, H2BC10, H2BC15, H2BC4, H3C11, H3C12, H3C2]	[ELP1, EP300, JADE1]	80	20	86.8263	13.1737	[ELP1, EP300, H2AC11, H2AC13, H2AC16, H2AC17, H2AC21, H2AC4, H2BC10, H2BC15, H2BC4, H3C11, H3C12, H3C2, JADE1]
R-HSA:9609646	HCMV Infection	REACTOME_Pathways_25.05.2022	0.00459277	0.00459277	0.0776752	0.0776752	Group15	9.375	15	Specific for Cluster #1	[H2AC11, H2AC13, H2AC16, H2AC17, H2AC21, H2AC4, H2BC10, H2BC15, H2BC4, H3C11, H3C12, H3C2, TUBA4A]	[CBX1, TPR]	86.6667	13.3333	91.4604	8.53959	[CBX1, H2AC11, H2AC13, H2AC16, H2AC17, H2AC21, H2AC4, H2BC10, H2BC15, H2BC4, H3C11, H3C12, H3C2, TPR, TUBA4A]
GO:0090066	regulation of anatomical structure size	GO_BiologicalProcess-EBI-UniProt-GOA-ACAP-ARAP_25.05.2022_00h00	0.000496634	0.000737426	5.50625e-12	9.36062e-11	Group16	7.56458	41	Specific for Cluster #2	[ADORA1, APOE, CSF3]	[ADD3, ARHGAP5, ARPC1A, ARPC3, BAIAP2L1, BMPR2, CAPZA2, CARMIL1, COMP, DEPTOR, F2R, FMN1, FOXC2, FYCO1, KLF2, LRRK2, MACF1, METAP2, NPR3, OLFM1, OXTR, PIK3CA, PIK3R2, PLEKHH2, PTK2B, RASA1, RGS2, RUFY3, SEMA3C, SEMA4A, SEMA5A, SLC12A2, SLC12A6, SNX9, SOD3, SPART, SPTAN1, TRPM4]	7.31707	92.6829	11.5109	88.4891	[ADD3, ADORA1, APOE, ARHGAP5, ARPC1A, ARPC3, BAIAP2L1, BMPR2, CAPZA2, CARMIL1, COMP, CSF3, DEPTOR, F2R, FMN1, FOXC2, FYCO1, KLF2, LRRK2, MACF1, METAP2, NPR3, OLFM1, OXTR, PIK3CA, PIK3R2, PLEKHH2, PTK2B, RASA1, RGS2, RUFY3, SEMA3C, SEMA4A, SEMA5A, SLC12A2, SLC12A6, SNX9, SOD3, SPART, SPTAN1, TRPM4]
GO:0032535	regulation of cellular component size	GO_BiologicalProcess-EBI-UniProt-GOA-ACAP-ARAP_25.05.2022_00h00	0.00200274	0.00218076	5.50625e-12	9.36062e-11	Group16	7.77202	30	Specific for Cluster #2	[APOE, CSF3]	[ADD3, ARHGAP5, ARPC1A, ARPC3, BAIAP2L1, BMPR2, CAPZA2, CARMIL1, DEPTOR, FMN1, FYCO1, MACF1, METAP2, OLFM1, PIK3CA, PIK3R2, PLEKHH2, PTK2B, RASA1, RUFY3, SEMA3C, SEMA4A, SEMA5A, SLC12A2, SLC12A6, SNX9, SPART, SPTAN1]	6.66667	93.3333	10.5301	89.4699	[ADD3, APOE, ARHGAP5, ARPC1A, ARPC3, BAIAP2L1, BMPR2, CAPZA2, CARMIL1, CSF3, DEPTOR, FMN1, FYCO1, MACF1, METAP2, OLFM1, PIK3CA, PIK3R2, PLEKHH2, PTK2B, RASA1, RUFY3, SEMA3C, SEMA4A, SEMA5A, SLC12A2, SLC12A6, SNX9, SPART, SPTAN1]
GO:0032970	regulation of actin filament-based process	GO_BiologicalProcess-EBI-UniProt-GOA-ACAP-ARAP_25.05.2022_00h00	2.99515e-05	8.15347e-05	5.50625e-12	9.36062e-11	Group17	8.81671	38	Specific for Cluster #2	[ADORA1, ARHGEF19, CSF3, GMFG, WASHC1]	[ADD3, AKAP9, ARPC1A, ARPC3, BAIAP2L1, BST1, CAPZA2, CARMIL1, CCN2, DSP, FERMT2, FMN1, LIMCH1, LRP1, NCOA3, NEDD9, PHLDB2, PIK3CA, PIK3R2, PLEKHH2, PTK2B, RASA1, RHOB, RHPN2, SEMA5A, SNX9, SPTAN1, TAOK1, TEK, TGFBR1, TJP1, TRPM4, WNT4]	13.1579	86.8421	19.9779	80.0221	[ADD3, ADORA1, AKAP9, ARHGEF19, ARPC1A, ARPC3, BAIAP2L1, BST1, CAPZA2, CARMIL1, CCN2, CSF3, DSP, FERMT2, FMN1, GMFG, LIMCH1, LRP1, NCOA3, NEDD9, PHLDB2, PIK3CA, PIK3R2, PLEKHH2, PTK2B, RASA1, RHOB, RHPN2, SEMA5A, SNX9, SPTAN1, TAOK1, TEK, TGFBR1, TJP1, TRPM4, WASHC1, WNT4]
GO:0097435	supramolecular fiber organization	GO_BiologicalProcess-EBI-UniProt-GOA-ACAP-ARAP_25.05.2022_00h00	5.83919e-11	2.8612e-09	5.50625e-12	9.36062e-11	Group17	9.36768	80	Specific for Cluster #2	[APOE, CSF3, EMP2, GMFG, LOXL3, PHACTR1, TNFAIP6, WASHC1]	[ADD3, AKAP9, ANKRD1, APC, ARHGAP12, ARPC1A, ARPC3, BAIAP2L1, CALD1, CAPN3, CAPZA2, CARMIL1, CCN2, CDKN2A, CEP126, CLIP3, CLIP4, COL14A1, COMP, CTNNA1, DIAPH3, DMD, DSP, DST, FAT1, FERMT2, FMN1, FMN2, FOXC2, FYCO1, ITGB5, JMY, KRT19, LIMCH1, LOX, LTBP3, MCU, MDM2, METAP2, MID1, MPRIP, MYO1E, NCKAP5, NCOA3, NEDD1, NEDD9, PHLDB2, PIK3CA, PIK3R2, PLEC, PLEKHH2, PLK3, PLS3, PTK2B, PTPRQ, RASA1, RB1, …	10	90	15.4748	84.5252	[ADD3, AKAP9, ANKRD1, APC, APOE, ARHGAP12, ARPC1A, ARPC3, BAIAP2L1, CALD1, CAPN3, CAPZA2, CARMIL1, CCN2, CDKN2A, CEP126, CLIP3, CLIP4, COL14A1, COMP, CSF3, CTNNA1, DIAPH3, DMD, DSP, DST, EMP2, FAT1, FERMT2, FMN1, FMN2, FOXC2, FYCO1, GMFG, ITGB5, JMY, KRT19, LIMCH1, LOX, LOXL3, LTBP3, MCU, MDM2, METAP2, MID1, MPRIP, MYO1E, NCKAP5, NCOA3, NEDD1, NEDD9, PHACTR1, PHLDB2, PIK3CA, PIK3R2, PLEC, PLEKHH2…
GO:0030036	actin cytoskeleton organization	GO_BiologicalProcess-EBI-UniProt-GOA-ACAP-ARAP_25.05.2022_00h00	9.81569e-09	1.20242e-07	5.50625e-12	9.36062e-11	Group17	8.92626	69	Specific for Cluster #2	[ARHGEF19, CSF3, CXCL1, EMP2, EPB41L3, GMFG, NUAK2, PHACTR1, WASHC1]	[ADD3, ANKRD1, ARHGAP12, ARPC1A, ARPC3, BAIAP2L1, BST1, CALD1, CAPN3, CAPZA2, CARMIL1, CCN2, CTNNA1, DAAM1, DIAPH3, DMD, EPB41L2, FAT1, FERMT2, FMN1, FMN2, FYCO1, ITGB5, JMY, KRT19, LIMCH1, LRP1, MCU, MPRIP, MYH10, MYO1E, NCOA3, NEDD9, PDLIM5, PHLDB2, PIK3CA, PIK3R2, PLEC, PLEKHH2, PLS3, PTK2B, RASA1, RHOB, RHOJ, RHPN2, RUFY3, SEMA5A, SHROOM3, SIPA1L1, SNX9, SPTAN1, TAOK1, TBCK, TEK, TGFBR1, TJP1…	13.0435	86.9565	19.8177	80.1823	[ADD3, ANKRD1, ARHGAP12, ARHGEF19, ARPC1A, ARPC3, BAIAP2L1, BST1, CALD1, CAPN3, CAPZA2, CARMIL1, CCN2, CSF3, CTNNA1, CXCL1, DAAM1, DIAPH3, DMD, EMP2, EPB41L2, EPB41L3, FAT1, FERMT2, FMN1, FMN2, FYCO1, GMFG, ITGB5, JMY, KRT19, LIMCH1, LRP1, MCU, MPRIP, MYH10, MYO1E, NCOA3, NEDD9, NUAK2, PDLIM5, PHACTR1, PHLDB2, PIK3CA, PIK3R2, PLEC, PLEKHH2, PLS3, PTK2B, RASA1, RHOB, RHOJ, RHPN2, RUFY3, SEMA5A, SH…
GO:0007015	actin filament organization	GO_BiologicalProcess-EBI-UniProt-GOA-ACAP-ARAP_25.05.2022_00h00	1.94329e-08	1.58702e-07	5.50625e-12	9.36062e-11	Group17	10.1871	49	Specific for Cluster #2	[CSF3, EMP2, GMFG, PHACTR1, WASHC1]	[ADD3, ARHGAP12, ARPC1A, ARPC3, BAIAP2L1, CALD1, CAPZA2, CARMIL1, CCN2, CTNNA1, DIAPH3, DMD, FAT1, FERMT2, FMN1, FMN2, FYCO1, ITGB5, JMY, LIMCH1, MCU, MPRIP, MYO1E, NCOA3, NEDD9, PHLDB2, PIK3CA, PIK3R2, PLEC, PLEKHH2, PLS3, PTK2B, RASA1, RHOB, RHPN2, RUFY3, SEMA5A, SHROOM3, SNX9, SPTAN1, TGFBR1, TJP1, WIPF1, WNT4]	10.2041	89.7959	15.7711	84.2289	[ADD3, ARHGAP12, ARPC1A, ARPC3, BAIAP2L1, CALD1, CAPZA2, CARMIL1, CCN2, CSF3, CTNNA1, DIAPH3, DMD, EMP2, FAT1, FERMT2, FMN1, FMN2, FYCO1, GMFG, ITGB5, JMY, LIMCH1, MCU, MPRIP, MYO1E, NCOA3, NEDD9, PHACTR1, PHLDB2, PIK3CA, PIK3R2, PLEC, PLEKHH2, PLS3, PTK2B, RASA1, RHOB, RHPN2, RUFY3, SEMA5A, SHROOM3, SNX9, SPTAN1, TGFBR1, TJP1, WASHC1, WIPF1, WNT4]
GO:0032956	regulation of actin cytoskeleton organization	GO_BiologicalProcess-EBI-UniProt-GOA-ACAP-ARAP_25.05.2022_00h00	0.000105683	0.000225151	5.50625e-12	9.36062e-11	Group17	8.76289	34	Specific for Cluster #2	[ARHGEF19, CSF3, GMFG, WASHC1]	[ADD3, ARPC1A, ARPC3, BAIAP2L1, BST1, CAPZA2, CARMIL1, CCN2, FERMT2, FMN1, LIMCH1, LRP1, NCOA3, NEDD9, PHLDB2, PIK3CA, PIK3R2, PLEKHH2, PTK2B, RASA1, RHOB, RHPN2, SEMA5A, SNX9, SPTAN1, TAOK1, TEK, TGFBR1, TJP1, WNT4]	11.7647	88.2353	18.0123	81.9877	[ADD3, ARHGEF19, ARPC1A, ARPC3, BAIAP2L1, BST1, CAPZA2, CARMIL1, CCN2, CSF3, FERMT2, FMN1, GMFG, LIMCH1, LRP1, NCOA3, NEDD9, PHLDB2, PIK3CA, PIK3R2, PLEKHH2, PTK2B, RASA1, RHOB, RHPN2, SEMA5A, SNX9, SPTAN1, TAOK1, TEK, TGFBR1, TJP1, WASHC1, WNT4]
GO:0051493	regulation of cytoskeleton organization	GO_BiologicalProcess-EBI-UniProt-GOA-ACAP-ARAP_25.05.2022_00h00	1.28121e-05	3.69291e-05	5.50625e-12	9.36062e-11	Group17	8.37696	48	Specific for Cluster #2	[ARHGEF19, CSF3, GMFG, WASHC1]	[ADD3, AFAP1, AKAP9, APC, ARPC1A, ARPC3, BAIAP2L1, BICD1, BST1, CAPZA2, CARMIL1, CCN2, CENATAC, CEP295, CHMP1B, CLIC4, CLIP3, FERMT2, FMN1, LIMCH1, LRP1, METAP2, MID1, NCOA3, NEDD9, NEXN, PHLDB2, PIK3CA, PIK3R2, PLEKHH2, PTK2B, RASA1, RHOB, RHPN2, SASS6, SEMA5A, SNX9, SPTAN1, TAOK1, TEK, TGFBR1, TJP1, TPR, WNT4]	8.33333	91.6667	13.0278	86.9722	[ADD3, AFAP1, AKAP9, APC, ARHGEF19, ARPC1A, ARPC3, BAIAP2L1, BICD1, BST1, CAPZA2, CARMIL1, CCN2, CENATAC, CEP295, CHMP1B, CLIC4, CLIP3, CSF3, FERMT2, FMN1, GMFG, LIMCH1, LRP1, METAP2, MID1, NCOA3, NEDD9, NEXN, PHLDB2, PIK3CA, PIK3R2, PLEKHH2, PTK2B, RASA1, RHOB, RHPN2, SASS6, SEMA5A, SNX9, SPTAN1, TAOK1, TEK, TGFBR1, TJP1, TPR, WASHC1, WNT4]
KEGG:04061	Viral protein interaction with cytokine and cytokine receptor	KEGG_25.05.2022	0.0036734	0.00374993	0.000141251	0.000200105	Group18	11	11	Specific for Cluster #1	[CCL2, CCL5, CCL7, CCL8, CXCL1, CXCL3, CXCL5, CXCL6, CXCL8, PF4V1, TNFRSF1B]	[]	100	0	100	0	[CCL2, CCL5, CCL7, CCL8, CXCL1, CXCL3, CXCL5, CXCL6, CXCL8, PF4V1, TNFRSF1B]
KEGG:04657	IL-17 signaling pathway	KEGG_25.05.2022	0.000668497	0.000963422	0.000141251	0.000200105	Group18	12.766	12	Specific for Cluster #1	[CCL2, CCL7, CSF3, CXCL1, CXCL3, CXCL5, CXCL6, CXCL8, MMP1, MMP3]	[FOS, FOSB]	83.3333	16.6667	89.1758	10.8242	[CCL2, CCL7, CSF3, CXCL1, CXCL3, CXCL5, CXCL6, CXCL8, FOS, FOSB, MMP1, MMP3]
WP:5095	Overview of proinflammatory and profibrotic mediators	WikiPathways_23.02.2022	0.0012771	0.00148995	0.000141251	0.000200105	Group18	10.8527	14	Specific for Cluster #1	[CCL2, CCL5, CCL7, CCL8, CSF3, CXCL1, CXCL3, CXCL5, CXCL6, CXCL8, IL1RN, MMP1, MMP3, PF4V1]	[]	100	0	100	0	[CCL2, CCL5, CCL7, CCL8, CSF3, CXCL1, CXCL3, CXCL5, CXCL6, CXCL8, IL1RN, MMP1, MMP3, PF4V1]
GO:0042379	chemokine receptor binding	GO_MolecularFunction-EBI-UniProt-GOA-ACAP-ARAP_25.05.2022_00h00	0.000261936	0.000442581	0.000141251	0.000200105	Group18	15.0685	11	Specific for Cluster #1	[CCL2, CCL5, CCL7, CCL8, CXCL1, CXCL3, CXCL5, CXCL6, CXCL8, PF4V1]	[JAK1]	90.9091	9.09091	94.2782	5.72175	[CCL2, CCL5, CCL7, CCL8, CXCL1, CXCL3, CXCL5, CXCL6, CXCL8, JAK1, PF4V1]
GO:0071621	granulocyte chemotaxis	GO_BiologicalProcess-EBI-UniProt-GOA-ACAP-ARAP_25.05.2022_00h00	0.000423191	0.000648012	0.000141251	0.000200105	Group18	11.1888	16	Specific for Cluster #1	[CCL2, CCL5, CCL7, CCL8, CXCL1, CXCL3, CXCL5, CXCL6, CXCL8, PF4V1, TNFAIP6]	[BST1, MCU, MOSPD2, SRP54, TNFSF18]	68.75	31.25	78.3783	21.6217	[BST1, CCL2, CCL5, CCL7, CCL8, CXCL1, CXCL3, CXCL5, CXCL6, CXCL8, MCU, MOSPD2, PF4V1, SRP54, TNFAIP6, TNFSF18]
GO:0070098	chemokine-mediated signaling pathway	GO_BiologicalProcess-EBI-UniProt-GOA-ACAP-ARAP_25.05.2022_00h00	3.54573e-05	8.68703e-05	0.000141251	0.000200105	Group18	15.2174	14	Specific for Cluster #1	[CCL2, CCL5, CCL7, CCL8, CXCL1, CXCL3, CXCL5, CXCL6, CXCL8, PF4V1]	[CNOT6, PTK2B, STK39, WNK1]	71.4286	28.5714	80.466	19.534	[CCL2, CCL5, CCL7, CCL8, CNOT6, CXCL1, CXCL3, CXCL5, CXCL6, CXCL8, PF4V1, PTK2B, STK39, WNK1]
GO:1990266	neutrophil migration	GO_BiologicalProcess-EBI-UniProt-GOA-ACAP-ARAP_25.05.2022_00h00	3.38623e-05	8.73291e-05	0.000141251	0.000200105	Group18	12.766	18	Specific for Cluster #1	[CCL2, CCL5, CCL7, CCL8, CXCL1, CXCL3, CXCL5, CXCL6, CXCL8, EMP2, PF4V1, TNFAIP6]	[BST1, MCU, MOSPD2, SRP54, XG, XGY2]	66.6667	33.3333	76.7195	23.2805	[BST1, CCL2, CCL5, CCL7, CCL8, CXCL1, CXCL3, CXCL5, CXCL6, CXCL8, EMP2, MCU, MOSPD2, PF4V1, SRP54, TNFAIP6, XG, XGY2]
GO:1990869	cellular response to chemokine	GO_BiologicalProcess-EBI-UniProt-GOA-ACAP-ARAP_25.05.2022_00h00	1.2758e-06	5.20951e-06	0.000141251	0.000200105	Group18	16.8317	17	Specific for Cluster #1	[CCL2, CCL5, CCL7, CCL8, CXCL1, CXCL3, CXCL5, CXCL6, CXCL8, PF4V1]	[CNOT6, DUSP1, LOX, PTK2B, SLC12A2, STK39, WNK1]	58.8235	41.1765	70.1838	29.8162	[CCL2, CCL5, CCL7, CCL8, CNOT6, CXCL1, CXCL3, CXCL5, CXCL6, CXCL8, DUSP1, LOX, PF4V1, PTK2B, SLC12A2, STK39, WNK1]
